# Supplementary material for: Genome-Wide DNA Methylation Changes Associated With High-Altitude Acclimatization During an Everest Base Camp Trek
Source: Front Physiol. 2021 Jun 28;12:660906. doi: 10.3389/fphys.2021.660906 (PMC8273439; doi:10.3389/fphys.2021.660906)
Supplement: Supplementary file 1 [file Data_Sheet_1.xlsx]

## Sheet: Sup. Table 1 
Supplementary Table S1. Significant Differentially methylated positions
	SNP	p.value	q.value	beta.High	beta.Low	beta.Diff	chr	Position (hg38)	strand	Relation to Island	UCSC_RefGene_Name	Phantom4_Enhancers	Phantom5_Enhancers	DMR	X450k_Enhancer
1998	cg05095110	0.00025113	0.0826503	0.039537	0.0360409	0.00349608	1	934390	-	Island	HES4;HES4
1637	cg25552017	0.000184878	0.0742054	0.54593	0.619196	-0.0732661	1	945416	+	N_Shelf				CDMR
2430	cg15825373	0.000336336	0.091014	0.689764	0.731364	-0.0415996	1	947153	-	N_Shore				CDMR
1495	cg24475622	0.000159074	0.0699679	0.0450278	0.0377705	0.0072573	1	1003851	+	Island
1001	cg17840536	8.07e-05	0.0529612	0.965758	0.973601	-0.00784293	1	1018254	+	Island	C1orf159
952	cg06778273	7.51e-05	0.0518534	0.0598935	0.0346059	0.0252876	1	1137117	-	Island			chr1:1136667-1136667
2390	cg13649172	0.000326324	0.0897599	0.0352054	0.0264164	0.00878897	1	1260152	-	Island	CPSF3L;CPSF3L;CPSF3L;CPSF3L;CPSF3L;CPTP;CPTP
219	cg22622472	7.15e-06	0.0214411	0.916063	0.952599	-0.0365362	1	1262818	+	Island	GLTPD1
448	cg12439834	2.31e-05	0.0339774	0.870404	0.915111	-0.0447078	1	1410849	+	N_Shelf	ATAD3B
1719	cg08376055	0.000197188	0.0754301	0.026059	0.0214654	0.00459361	1	1447341	+	Island	ATAD3A;ATAD3A;ATAD3A
2117	cg06128920	0.000279219	0.0867292	0.0206713	0.0176277	0.00304363	1	1447374	+	Island	ATAD3A;ATAD3A;ATAD3A
1558	cg12632610	0.000170791	0.0720841	0.907344	0.931541	-0.0241968	1	1474224	-	N_Shore	C1orf70
1470	cg14953148	0.000156398	0.0699366	0.840939	0.83614	0.0047992	1	1792846	-	OpenSea	GNB1;GNB1;GNB1
181	cg26252027	5.28e-06	0.0191802	0.890495	0.930965	-0.0404702	1	2012218	+	OpenSea	PRKCZ;PRKCZ
2643	cg09225489	0.00038687	0.0962488	0.920532	0.942135	-0.0216024	1	2099891	+	OpenSea	PRKCZ;PRKCZ;PRKCZ
1492	cg02283181	0.000158923	0.0699679	0.0405002	0.0337851	0.00671504	1	2165868	-	OpenSea	SKI
48	cg00954996	5.4e-07	0.00708837	0.683333	0.771622	-0.0882885	1	2193454	+	OpenSea	SKI
2230	cg21404476	0.000298654	0.0880095	0.952918	0.95874	-0.00582264	1	2218549	+	N_Shelf	SKI
1286	cg20406347	0.000124361	0.063508	0.970304	0.978723	-0.00841849	1	2288463	-	OpenSea	MORN1
2713	cg17444015	0.000401896	0.0973593	0.0188253	0.0153791	0.00344627	1	2322981	+	Island	MORN1;RER1;MORN1
2154	cg27442054	0.000285801	0.0872488	0.953807	0.968029	-0.014222	1	2449541	-	N_Shore	PANK4
1284	cg06988547	0.000123772	0.0633865	0.920932	0.93809	-0.0171586	1	2839763	+	OpenSea
95	cg07795402	1.5e-06	0.0103947	0.914238	0.946437	-0.0321988	1	2938954	-	Island	ACTRT2
328	cg21682432	1.38e-05	0.0275386	0.94858	0.960096	-0.0115156	1	3207419	-	S_Shelf	PRDM16;PRDM16
360	cg25783497	1.61e-05	0.029361	0.756723	0.813052	-0.0563289	1	3307070	-	Island	PRDM16;PRDM16
1252	cg15120141	0.000119553	0.0627908	0.0225448	0.0190349	0.00350998	1	3566485	+	Island	WDR8
2112	cg06086922	0.000278517	0.0866908	0.865078	0.858961	0.00611734	1	5907118	+	OpenSea
750	cg00011717	5.24e-05	0.0459021	0.934465	0.956077	-0.0216127	1	5918462	-	OpenSea
363	cg03734402	1.62e-05	0.029361	0.0427572	0.0330867	0.00967049	1	6265417	-	N_Shore	RNF207
1871	cg14565431	0.00022479	0.0790031	0.893865	0.903844	-0.00997942	1	6278393	-	OpenSea	RNF207
1005	cg26257210	8.12e-05	0.0531435	0.0429738	0.0308	0.0121737	1	6305348	+	Island	HES3
1939	cg04813818	0.00024019	0.081382	0.036095	0.0263631	0.00973196	1	6663004	-	Island	KLHL21	high-CpG:6585268-6585831
655	cg20285559	4.1e-05	0.041155	0.873044	0.920734	-0.04769	1	6688542	+	S_Shelf	THAP3
290	cg07344096	1.13e-05	0.0254933	0.874966	0.918537	-0.0435715	1	7724122	-	Island	CAMTA1
2632	cg03849780	0.000384421	0.0960125	0.863498	0.899046	-0.035548	1	7816037	-	OpenSea	CAMTA1
523	cg02563827	2.91e-05	0.0366141	0.820685	0.858492	-0.0378072	1	8003721	+	S_Shore	TNFRSF9
2084	cg21381136	0.000272189	0.0858844	0.729179	0.774141	-0.0449624	1	8445818	-	OpenSea	RERE;RERE;RERE		chr1:8445817-8445817
273	cg12009809	1.05e-05	0.025161	0.804972	0.867045	-0.0620726	1	10007284	-	S_Shelf	NMNAT1;NMNAT1;NMNAT1
1129	cg11196904	9.94e-05	0.0578751	0.0333783	0.0268679	0.00651043	1	10491304	-	S_Shore	APITD1;APITD1;APITD1;APITD1
395	cg16100063	1.93e-05	0.0319076	0.922236	0.951906	-0.0296697	1	10690011	-	OpenSea	PEX14
2839	cg10456583	0.000427949	0.0990808	0.0200675	0.02049	-0.000422509	1	11097990	+	OpenSea	MASP2
1118	cg16681977	9.75e-05	0.0573527	0.0730686	0.0521352	0.0209334	1	11332969	+	N_Shore	UBIAD1
823	cg07803781	6.01e-05	0.0479671	0.0299491	0.0218007	0.00814847	1	11333577	+	S_Shore	UBIAD1;UBIAD1	high-CpG:11255831-11256167
1759	cg08055132	0.000205281	0.0767042	0.939638	0.950892	-0.0112544	1	12587564	-	OpenSea
2453	cg11694418	0.000340133	0.0911481	0.0181355	0.0152122	0.0029233	1	12678208	-	Island	DHRS3
1849	cg09826587	0.000221631	0.0787734	0.0295708	0.0249602	0.00461064	1	14026817	-	Island	PRDM2	high-CpG:13899272-13899566
703	cg17451046	4.62e-05	0.0431954	0.82346	0.854177	-0.030717	1	14746224	-	OpenSea
1440	cg17725211	0.000150067	0.0684932	0.0187285	0.0158237	0.0029048	1	15480236	+	Island	TMEM51;TMEM51;TMEM51;TMEM51;TMEM51;TMEM51;C1orf126	high-CpG:15352795-15352856
1163	cg27187669	0.000104827	0.0591738	0.971852	0.977285	-0.0054331	1	16058427	+	Island	PLEKHM2
271	cg26036626	1.04e-05	0.025161	0.060125	0.0387954	0.0213296	1	16085597	-	Island	FBLIM1
2335	cg00924622	0.000317001	0.0891098	0.897627	0.913825	-0.016198	1	16819693	-	OpenSea	CROCCL2
2116	cg20810288	0.000279054	0.0867188	0.0258033	0.0198312	0.00597213	1	19638859	-	Island	PQLC2;AKR7A2;PQLC2;PQLC2;PQLC2
1257	cg19886206	0.000120568	0.062983	0.0377199	0.032547	0.0051729	1	19811223	-	N_Shore	CAPZB;CAPZB;CAPZB;CAPZB
1576	cg02804706	0.000173855	0.07253	0.769151	0.797839	-0.0286888	1	19836404	+	OpenSea
1847	cg15930811	0.000221312	0.0787734	0.820639	0.865907	-0.0452677	1	19922369	-	N_Shore	C1orf151
1540	cg20141851	0.00016742	0.0714025	0.0152135	0.0126847	0.00252874	1	19970517	-	Island	NBL1;NBL1;MINOS1-NBL1;MINOS1-NBL1;NBL1;NBL1;NBL1;NBL1
2147	cg03056854	0.000284322	0.0870414	0.861235	0.88974	-0.0285047	1	20005414	+	N_Shore	HTR6
369	cg27137902	1.66e-05	0.0293849	0.0270194	0.0198119	0.0072074	1	21044357	-	Island	KIF17;KIF17;KIF17;KIF17;KIF17;KIF17
755	cg22685052	5.31e-05	0.0461814	0.840413	0.890735	-0.0503218	1	22777719	+	N_Shore	ZBTB40;ZBTB40
459	cg14271400	2.39e-05	0.0342126	0.0209584	0.0170456	0.00391284	1	23036980	+	Island	EPHB2;EPHB2
2246	cg00966078	0.000302663	0.088359	0.78654	0.846851	-0.0603104	1	23079320	-	OpenSea	EPHB2;EPHB2				TRUE
2197	cg18474038	0.000294252	0.087922	0.0165667	0.0140393	0.00252745	1	23751374	-	Island	TCEA3
1636	cg17901687	0.000184822	0.0742054	0.782197	0.834145	-0.0519484	1	24062089	-	OpenSea
916	cg06774618	7.12e-05	0.0511482	0.0157029	0.0138914	0.00181149	1	24117530	+	Island	LYPLA2
213	cg06156260	6.98e-06	0.0214411	0.878063	0.918823	-0.0407597	1	25292412	+	OpenSea	RUNX3
1840	cg04194362	0.000220212	0.0786595	0.93118	0.940816	-0.00963555	1	25694081	+	OpenSea	RHCE;RHCE;RHCE;RHCE
2114	cg01136232	0.000278811	0.0867188	0.0975206	0.127571	-0.0300507	1	25756842	-	Island	TMEM57
471	cg20188324	2.49e-05	0.0346252	0.756745	0.819659	-0.0629142	1	25926739	+	OpenSea
1452	cg14284699	0.000153522	0.0695258	0.942478	0.953908	-0.0114295	1	26139164	+	OpenSea	SEPN1;SEPN1;SEPN1;SEPN1
1190	cg15118519	0.000109033	0.0601829	0.628283	0.666598	-0.038315	1	26699617	-	OpenSea	ZNF683;ZNF683
1308	cg17739026	0.000128224	0.064456	0.0194845	0.0168164	0.00266807	1	27114420	-	Island	PIGV	high-CpG:26986996-26987090
2126	cg16740167	0.000281518	0.0869799	0.00948312	0.00875201	0.000731114	1	27560800	+	Island	WDTC1
2484	cg10294400	0.000348213	0.0921316	0.912759	0.925471	-0.0127127	1	27618115	+	OpenSea	WDTC1;WDTC1
1241	cg02152399	0.000116515	0.0617379	0.859163	0.891096	-0.0319334	1	27710270	+	S_Shore	CD164L2
2818	cg11934849	0.000423977	0.0989334	0.726176	0.770423	-0.0442464	1	27769243	-	OpenSea	WASF2;WASF2
70	cg17602823	8.69e-07	0.00816036	0.0295968	0.0217353	0.00786147	1	28586543	-	Island	SESN2
1807	cg23333032	0.000215435	0.0783541	0.816914	0.84019	-0.0232761	1	29360821	-	OpenSea	EPB41;EPB41;EPB41;EPB41;EPB41;EPB41
2170	cg06703062	0.000288598	0.0874195	0.0141468	0.0110459	0.00310093	1	31191648	-	Island	MATN1	high-CpG:30964199-30964237
237	cg09261992	8.29e-06	0.0230097	0.746806	0.83627	-0.0894637	1	31510528	+	OpenSea	PUM1;PUM1				TRUE
2679	cg03116642	0.00039477	0.0968446	0.0127117	0.0109086	0.00180315	1	32230162	+	Island	BAI2
310	cg08757017	1.24e-05	0.0260124	0.782589	0.834872	-0.0522824	1	32386418	+	OpenSea	PTP4A2;PTP4A2;PTP4A2
2538	cg13173369	0.00035864	0.0929197	0.800954	0.855177	-0.0542237	1	32444348	-	OpenSea					TRUE
2544	cg02048475	0.00036036	0.0931453	0.0193876	0.0166346	0.00275307	1	33283666	-	Island	S100PBP;S100PBP;YARS
718	cg00821567	4.82e-05	0.0441157	0.962969	0.969794	-0.00682486	1	33625438	+	Island	TRIM62
2330	cg25005345	0.00031622	0.0891098	0.0328677	0.0267351	0.00613261	1	33815686	-	Island	PHC2;PHC2
1382	cg07939646	0.000141973	0.0675522	0.424343	0.480555	-0.056211	1	35961660	+	OpenSea	KIAA0319L
1095	cg08349306	9.49e-05	0.0569676	0.0266929	0.0222944	0.00439848	1	36772690	-	Island	SH3D21;SH3D21
207	cg12388052	6.45e-06	0.0204998	0.714895	0.830587	-0.115693	1	37739921	+	OpenSea					TRUE
2167	cg08739385	0.000288211	0.0874195	0.544245	0.665955	-0.121711	1	38201818	-	S_Shore	EPHA10
1122	cg09148975	9.86e-05	0.0576483	0.0447375	0.0303998	0.0143376	1	38274245	-	Island	C1orf122;C1orf122;YRDC
2009	cg03900366	0.000253866	0.0830568	0.750577	0.790544	-0.0399679	1	39587573	-	OpenSea	MACF1
1910	cg04923576	0.000233342	0.0803342	0.0260531	0.0209429	0.00511025	1	39956807	-	Island	BMP8A
1405	cg16407604	0.000145178	0.0679465	0.0296966	0.0240173	0.00567929	1	40724172	+	S_Shore	ZMPSTE24
2699	cg09484076	0.000399347	0.097275	0.0244738	0.0207297	0.00374411	1	41446134	+	S_Shore	CTPS1;CTPS1
1575	cg00345123	0.000173702	0.0725213	0.0484346	0.0472689	0.00116565	1	41446245	+	S_Shore	CTPS1;CTPS1
305	cg19649012	1.22e-05	0.0260124	0.81452	0.864056	-0.0495357	1	41626802	-	OpenSea	SCMH1;SCMH1;SCMH1;SCMH1;SCMH1;SCMH1;SCMH1
1089	cg15012766	9.38e-05	0.0566686	0.0125245	0.0100337	0.00249077	1	41832369	+	Island					TRUE
2370	cg09322386	0.000321868	0.089296	0.906416	0.938276	-0.0318603	1	41863226	+	OpenSea					TRUE
1987	cg12666727	0.000248572	0.0822409	0.0196177	0.015813	0.00380464	1	42128487	+	Island	HIVEP3;HIVEP3	high-CpG:41900415-41901211	chr1:42127851-42127851
1821	cg02254315	0.000217926	0.0785976	0.0338363	0.0236814	0.0101549	1	42800772	+	Island	FOXJ3;FOXJ3;FOXJ3;FOXJ3;FOXJ3;FOXJ3	high-CpG:42573210-42573583
847	cg16080420	6.4e-05	0.0496566	0.891588	0.936691	-0.0451028	1	43252323	+	S_Shore	LOC100129924
2615	cg19086488	0.000378703	0.0952287	0.685473	0.749962	-0.0644897	1	43752185	-	OpenSea	C1orf210;C1orf210
2680	cg24695281	0.000395137	0.0968446	0.822425	0.867278	-0.0448533	1	43760803	+	OpenSea					TRUE
1822	cg15524063	0.000217943	0.0785976	0.0207302	0.0178398	0.00289043	1	43832916	+	Island	ELOVL1
1965	cg17494855	0.000244929	0.0819151	0.0283724	0.0225341	0.00583831	1	43855675	-	Island	C1orf84;MED8;MED8
2514	cg01624937	0.000353068	0.0922645	0.0310102	0.0224763	0.00853396	1	43997446	+	Island	PTPRF;PTPRF
375	cg12188398	1.69e-05	0.0297076	0.822754	0.842201	-0.019447	1	44434504	-	N_Shore	DPH2;DPH2
618	cg25605771	3.7e-05	0.039321	0.90534	0.93986	-0.0345196	1	44466601	-	OpenSea	SLC6A9;SLC6A9;SLC6A9
260	cg21573263	9.85e-06	0.024908	0.77138	0.831974	-0.0605941	1	44482918	+	OpenSea	SLC6A9;SLC6A9;SLC6A9;SLC6A9;SLC6A9				TRUE
771	cg26275242	5.44e-05	0.0461814	0.0294269	0.0244902	0.00493672	1	44820858	+	Island	ERI3;ERI3	high-CpG:44593410-44593571
456	cg06766016	2.37e-05	0.0341701	0.941721	0.956716	-0.0149952	1	45278971	-	Island	BTBD19
2771	cg05393563	0.000415436	0.0983804	0.0225048	0.0183171	0.0041877	1	45672071	-	Island	ZSWIM5;ZSWIM5	high-CpG:45444621-45444865
538	cg13841901	3.04e-05	0.0371345	0.0192031	0.0156403	0.00356287	1	45805975	+	Island	MUTYH;TOE1;MUTYH;MUTYH;MUTYH;MUTYH;MUTYH;MUTYH;MUTYH;MUTYH
2288	cg11224062	0.000307942	0.0885023	0.87009	0.903105	-0.0330158	1	45963190	-	N_Shelf	CCDC163P
2404	cg03939875	0.000330867	0.0904461	0.0201655	0.0165453	0.00362025	1	46016565	+	Island	AKR1A1;AKR1A1;AKR1A1;AKR1A1	high-CpG:45789048-45789362
141	cg03057182	3.46e-06	0.0161273	0.705314	0.807603	-0.10229	1	46252470	-	OpenSea
1085	cg12800095	9.33e-05	0.0565294	0.84156	0.883275	-0.0417151	1	46594087	+	OpenSea	PIK3R3;PIK3R3;PIK3R3;PIK3R3;PIK3R3
2825	cg10955297	0.000425533	0.0989762	0.762364	0.850681	-0.0883169	1	46709406	+	S_Shelf
1310	cg05363350	0.000128658	0.0645814	0.69103	0.744381	-0.0533506	1	46727745	+	OpenSea	RAD54L;RAD54L
2332	cg25382472	0.000316419	0.0891098	0.0194608	0.0152212	0.00423957	1	47779932	-	Island	STIL;STIL
2199	cg06187843	0.000294714	0.087922	0.0254864	0.0194021	0.00608434	1	47973794	+	Island
2724	cg06523144	0.000405132	0.0977584	0.735737	0.77822	-0.0424831	1	48137147	-	OpenSea
422	cg22234394	2.12e-05	0.0328311	0.924729	0.948211	-0.0234813	1	49224936	+	OpenSea	BEND5;BEND5;BEND5;AGBL4
2087	cg00963169	0.000273588	0.0861609	0.0298917	0.0215385	0.00835321	1	50513927	+	Island	ELAVL4				TRUE
928	cg10120574	7.24e-05	0.0512108	0.792602	0.829985	-0.0373824	1	51073568	+	OpenSea	FAF1
1662	cg23095642	0.000188349	0.0744816	0.843176	0.879512	-0.0363362	1	52081938	+	OpenSea	OSBPL9;OSBPL9;OSBPL9;OSBPL9;OSBPL9
2043	cg24713343	0.000261784	0.0841967	0.0643539	0.0394134	0.0249406	1	52082692	+	OpenSea	OSBPL9;OSBPL9;OSBPL9;OSBPL9
1224	cg16117789	0.000113625	0.061005	0.970702	0.978878	-0.00817581	1	53904634	-	Island	FLJ40434
1444	cg22820285	0.000150425	0.0685004	0.0212029	0.0190075	0.0021954	1	55008241	+	Island					TRUE
1708	cg04797274	0.000195328	0.0752001	0.653871	0.692079	-0.0382076	1	57432416	+	OpenSea	C8B;C8B;C8B
286	cg03677161	1.11e-05	0.0254933	0.679621	0.745422	-0.0658016	1	59278958	+	N_Shore
1755	cg03009196	0.000204685	0.0766919	0.0287625	0.0240543	0.00470829	1	60392511	+	Island	CYP2J2				TRUE
765	cg11531787	5.41e-05	0.0461814	0.0709537	0.0846055	-0.0136518	1	61548783	-	Island	NFIA;NFIA;NFIA;NFIA
2018	cg08008065	0.000256227	0.0834865	0.796909	0.845485	-0.0485761	1	62673941	-	OpenSea	L1TD1;L1TD1
1099	cg10748669	9.59e-05	0.0572647	0.805394	0.846973	-0.041579	1	63544720	-	OpenSea
1686	cg17734803	0.000191869	0.074708	0.0301894	0.0222624	0.00792702	1	63789404	-	Island	FOXD3-AS1;FOXD3-AS1;FOXD3-AS1;FOXD3;FOXD3-AS1			DMR
711	cg09726328	4.7e-05	0.0434389	0.0256217	0.0185425	0.00707917	1	63833127	+	Island	ALG6
1263	cg27303880	0.000121066	0.0629942	0.016425	0.0132994	0.00312565	1	64240188	+	Island	ROR1;ROR1
1824	cg13757506	0.00021818	0.0785976	0.724196	0.720965	0.00323131	1	64639425	+	OpenSea	ROR1
2557	cg26698115	0.000365116	0.0938593	0.13525	0.111199	0.0240509	1	67390377	-	N_Shore	WDR78;WDR78;MIER1;MIER1;MIER1;MIER1;MIER1;MIER1;MIER1;MIER1;MIER1
2796	cg16429999	0.000419047	0.0984813	0.0427742	0.0351176	0.00765653	1	76251815	-	OpenSea	SNORD45C;RABGGTB;RABGGTB
1312	cg20932762	0.000128996	0.0646043	0.744442	0.789426	-0.0449837	1	76261299	+	N_Shore	MSH4
2696	cg05862479	0.000398538	0.097157	0.606126	0.679305	-0.0731791	1	77614273	+	OpenSea	PIGK
2783	cg13133000	0.000416568	0.0984161	0.711049	0.744714	-0.0336646	1	78463620	+	OpenSea
2166	cg04011353	0.000288093	0.0874195	0.0358435	0.031165	0.00467853	1	85155872	+	Island	SSX2IP;SSX2IP;SSX2IP;SSX2IP;SSX2IP;SSX2IP;SSX2IP
277	cg04976850	1.06e-05	0.025161	0.591973	0.643645	-0.0516726	1	86905492	+	OpenSea	CLCA2
1879	cg09290554	0.000226722	0.079343	0.0307375	0.0238648	0.00687278	1	87170564	+	Island	SH3GLB1;SH3GLB1;SH3GLB1;SH3GLB1;SH3GLB1;SH3GLB1;SH3GLB1;SH3GLB1	high-CpG:86942810-86943182
1081	cg05711542	9.27e-05	0.0564144	0.0172281	0.0138902	0.00333791	1	90460799	+	Island	LOC492303;ZNF326;ZNF326;ZNF326;ZNF326	high-CpG:90233238-90233602
2326	cg19731044	0.000315797	0.0891098	0.0314646	0.0258948	0.00556981	1	91172982	+	S_Shore				DMR
2053	cg20463526	0.000264124	0.0845783	0.0203076	0.0153346	0.00497295	1	91191001	+	Island			chr1:91190991-91190991	DMR	TRUE
603	cg24714742	3.56e-05	0.0387783	0.0481221	0.0381847	0.00993738	1	91487571	-	Island	ZNF644;ZNF644;ZNF644;ZNF644;ZNF644	high-CpG:91259607-91260441
659	cg09408023	4.15e-05	0.0414102	0.52551	0.595617	-0.0701073	1	91873278	-	S_Shelf
892	cg23845507	6.85e-05	0.0504947	0.0159781	0.0134239	0.00255425	1	91966731	-	Island	CDC7;CDC7;CDC7;CDC7
1611	cg02292720	0.000179973	0.0734098	0.742005	0.771139	-0.0291347	1	92099528	+	OpenSea	HSP90B3P
2705	cg06647562	0.000400352	0.0973231	0.020144	0.0164194	0.00372462	1	92950369	-	Island	GFI1;GFI1;GFI1
835	cg04838747	6.24e-05	0.0491708	0.0249662	0.0207977	0.00416851	1	92950450	-	Island	GFI1;GFI1;GFI1
1894	cg06907479	0.000229857	0.0798029	0.0314986	0.0259845	0.00551405	1	93250741	-	Island	EVI5	high-CpG:93023157-93023650
2587	cg08117436	0.000373563	0.0949378	0.569979	0.629711	-0.0597321	1	93293756	+	N_Shelf
126	cg10387458	2.7e-06	0.0139844	0.0269556	0.0211707	0.00578497	1	93645817	+	Island	TMED5;TMED5;TMED5;CCDC18;TMED5;TMED5
1290	cg01894644	0.000124788	0.063508	0.0188077	0.0158991	0.00290857	1	94147101	-	Island	BCAR3;BCAR3;BCAR3
1859	cg02993630	0.000222719	0.0787757	0.0321151	0.0272458	0.00486937	1	94311961	-	Island	MIR760	high-CpG:94084549-94084918
1386	cg24329521	0.000142474	0.0675777	0.0373983	0.0292743	0.00812394	1	97187516	+	Island	PTBP2
2460	cg24794734	0.00034258	0.0915733	0.0242771	0.0207669	0.00351021	1	100316114	+	S_Shore	AGL;AGL;AGL;AGL;AGL;AGL;AGL;AGL
2752	cg12727462	0.000410684	0.0981299	0.0204875	0.0174496	0.00303794	1	108742820	-	Island	SLC25A24;SLC25A24	high-CpG:108544308-108544558
947	cg12100751	7.45e-05	0.0517449	0.0328394	0.016961	0.0158784	1	109203672	-	Island	C1orf59;C1orf59;C1orf59
880	cg11284811	6.7e-05	0.0499455	0.0214983	0.0179749	0.00352348	1	109203856	+	Island	HENMT1;HENMT1;HENMT1	high-CpG:109005216-109005594
2085	cg14065576	0.000272328	0.085887	0.0175457	0.0150993	0.00244647	1	110210635	-	Island	GSTM2;GSTM2				TRUE
1268	cg10704147	0.000121818	0.0631736	0.586762	0.651914	-0.0651529	1	111488730	+	OpenSea
2101	cg22780428	0.000276125	0.0864213	0.0398466	0.0331387	0.0067079	1	111682262	-	Island	CEPT1;CEPT1;DRAM2;CEPT1
2138	cg25355888	0.000282901	0.0869799	0.0119922	0.0104163	0.00157586	1	112162642	-	Island	RAP1A;RAP1A;RAP1A
1254	cg06201907	0.000119777	0.0628081	0.0369681	0.0270316	0.00993652	1	113249974	-	Island	RHOC;RHOC;RHOC;RHOC;RHOC	high-CpG:113051225-113051554
1166	cg19743613	0.000105239	0.0591738	0.83188	0.864292	-0.0324128	1	113450182	+	OpenSea
2099	cg14912723	0.000275561	0.086327	0.0244185	0.0214266	0.00299192	1	113616077	+	Island	LRIG2
2103	cg07212644	0.000276633	0.0864431	0.0164521	0.0145569	0.00189527	1	114301956	+	Island	PHTF1	high-CpG:114103276-114103711
186	cg16145701	5.66e-06	0.0197875	0.0856047	0.0479093	0.0376953	1	114472499	+	Island	HIPK1;HIPK1
190	cg16124571	5.75e-06	0.0199167	0.0485148	0.0340167	0.0144982	1	115212670	+	Island	DENND2C;DENND2C	high-CpG:115014151-115014256
1633	cg04533810	0.00018376	0.0739956	0.0299867	0.024092	0.00589467	1	116184601	-	Island	VANGL1;VANGL1;VANGL1;VANGL1;VANGL1
661	cg02862748	4.19e-05	0.0414401	0.920646	0.946218	-0.0255726	1	119426493	-	OpenSea	TBX15
1200	cg21868703	0.000110307	0.0604258	0.0182789	0.0148992	0.00337968	1	145516067	-	Island	GNRHR2;PEX11B
1349	cg18021393	0.000135194	0.0659002	0.0250825	0.0198849	0.00519764	1	145516084	+	Island	GNRHR2;PEX11B
373	cg03987003	1.67e-05	0.0295087	0.10227	0.0677671	0.0345033	1	145516092	+	Island	GNRHR2;PEX11B
1489	cg23373718	0.000158794	0.0699679	0.0306537	0.0226595	0.00799414	1	145575946	-	Island	PIAS3;NBPF20;NBPF10;NBPF10
792	cg26313349	5.57e-05	0.0462698	0.0457468	0.0323299	0.013417	1	145589328	+	Island	NUDT17	high-CpG:144300676-144300855			TRUE
621	cg06531250	3.71e-05	0.039321	0.948284	0.96598	-0.0176959	1	147380445	-	Island	GJA8
2777	cg14601938	0.000415655	0.0983804	0.0195811	0.0159107	0.00367035	1	150122016	+	Island	PLEKHO1
1198	cg23115219	0.000110159	0.0604258	0.0237048	0.0197563	0.00394849	1	150459717	+	OpenSea	TARS2
2010	cg09804220	0.000253881	0.0830568	0.0224222	0.0182004	0.00422183	1	150551983	+	Island	MCL1;MCL1	high-CpG:148818304-148818755
1639	cg02037976	0.000184958	0.0742054	0.633527	0.670177	-0.0366499	1	150693868	+	OpenSea	HORMAD1;HORMAD1
1841	cg02970925	0.000220223	0.0786595	0.895135	0.899338	-0.00420275	1	151338813	-	OpenSea	SELENBP1;SELENBP1;SELENBP1
1182	cg17947121	0.000106491	0.0591738	0.858911	0.889962	-0.031051	1	152733140	+	Island	KPRP
2552	cg15108991	0.000363328	0.093618	0.678696	0.721314	-0.0426183	1	153349296	+	OpenSea	S100A12
1632	cg16479798	0.000183664	0.0739956	0.8055	0.844918	-0.0394182	1	153738754	+	OpenSea	INTS3
993	cg15893127	7.98e-05	0.0527569	0.0445002	0.0343227	0.0101775	1	153756397	-	S_Shore
13	cg16684608	8.4e-08	0.00424779	0.618305	0.788583	-0.170278	1	153758749	-	S_Shelf
1555	cg17513182	0.000170598	0.0720841	0.0635294	0.0468594	0.01667	1	153894941	-	Island	GATAD2B
1390	cg02223139	0.000143015	0.0675777	0.0162371	0.0138241	0.00241303	1	153935935	+	Island	MIR6737;SLC39A1;SLC39A1;SLC39A1;SLC39A1;SLC39A1;SLC39A1;SLC39A1
2000	cg23233141	0.00025199	0.0828501	0.0216904	0.0174323	0.00425805	1	154297874	+	N_Shore	ATP8B2			DMR
1077	cg17127816	9.21e-05	0.0562157	0.97583	0.979893	-0.00406231	1	154544538	-	Island	CHRNB2
2022	cg27576241	0.00025769	0.0837184	0.83104	0.825356	0.00568384	1	155034570	-	N_Shore	ADAM15;ADAM15;ADAM15;ADAM15;ADAM15;ADAM15
208	cg06058618	6.65e-06	0.0210276	0.0404384	0.0345396	0.00589882	1	155057452	-	Island	EFNA3
1314	cg12620771	0.000129144	0.0646277	0.0727616	0.0467767	0.0259849	1	155108759	+	S_Shore	SLC50A1;SLC50A1;SLC50A1;SLC50A1;SLC50A1;SLC50A1;SLC50A1;SLC50A1;SLC50A1;SLC50A1;SLC50A1;SLC50A1;SLC50A1;SLC50A1;SLC50A1;SLC50A1;SLC50A1;SLC50A1;SLC50A1
170	cg06216400	4.71e-06	0.0181625	0.768461	0.83564	-0.0671785	1	155161161	-	N_Shelf	MUC1;MUC1;MUC1;MUC1;MUC1;MUC1;MUC1
2120	cg13420845	0.000280347	0.0869489	0.0349581	0.0287839	0.00617419	1	155220231	-	Island	FAM189B;FAM189B
1595	cg16546681	0.000177107	0.0730159	0.908075	0.93764	-0.0295655	1	155244518	-	S_Shore	CLK2
16	cg13486309	1.23e-07	0.0048394	0.611895	0.72187	-0.109975	1	155329113	-	OpenSea	ASH1L
65	cg21211696	7.52e-07	0.00752611	0.815695	0.872446	-0.0567505	1	155741125	-	OpenSea	GON4L;GON4L;GON4L;GON4L;GON4L
1629	cg18216292	0.000183217	0.073958	0.958304	0.970606	-0.0123026	1	155920810	+	Island	ARHGEF2;ARHGEF2;ARHGEF2
2188	cg20447259	0.000292089	0.0877826	0.0122412	0.0101981	0.00204307	1	155947878	+	Island	ARHGEF2;ARHGEF2;ARHGEF2;ARHGEF2
339	cg00383735	1.47e-05	0.0284601	0.887863	0.917954	-0.0300906	1	157050854	-	OpenSea					TRUE
483	cg08812177	2.57e-05	0.0348363	0.842587	0.898862	-0.0562748	1	159772156	+	OpenSea	FCRL6;FCRL6
526	cg20928554	2.95e-05	0.036795	0.718509	0.794271	-0.0757623	1	160760300	+	OpenSea			chr1:160760229-160760229
2446	cg10511264	0.000338858	0.0910968	0.849855	0.893156	-0.0433009	1	161013623	+	OpenSea	USF1;USF1;USF1
1738	cg24167624	0.000200764	0.0759172	0.0369217	0.0279702	0.00895158	1	161993686	-	Island	OLFML2B;OLFML2B;OLFML2B;OLFML2B
736	cg05381183	5.1e-05	0.0455322	0.644734	0.684662	-0.0399279	1	162025719	+	OpenSea					TRUE
2673	cg16660899	0.000393507	0.0968044	0.86879	0.920011	-0.0512212	1	167095593	-	OpenSea	DUSP27
937	cg26839871	7.36e-05	0.0514617	0.0348088	0.0264904	0.00831833	1	171811299	+	Island	DNM3;DNM3			DMR
1453	cg04562976	0.000153657	0.0695392	0.0141713	0.0122149	0.00195638	1	172501996	-	Island	C1orf9;C1orf9
262	cg18508448	9.94e-06	0.0249518	0.734945	0.788286	-0.0533409	1	173612055	+	OpenSea	ANKRD45
2527	cg17465886	0.000355381	0.0924763	0.019046	0.0164582	0.00258781	1	179262956	-	Island	SOAT1	high-CpG:177529487-177529609
100	cg20242752	1.89e-06	0.0124014	0.025597	0.0204786	0.00511842	1	179713091	-	Island	FAM163A			DMR	TRUE
2788	cg09228562	0.000417672	0.0984771	0.0211436	0.0177016	0.003442	1	182808478	+	Island	DHX9;DHX9	high-CpG:181075059-181075456
1242	cg20317417	0.000116882	0.0618347	0.0124816	0.0109034	0.00157811	1	182992454	-	Island	LAMC1	high-CpG:181258952-181259376
866	cg10581625	6.59e-05	0.0499208	0.728931	0.79658	-0.0676485	1	183208626	-	OpenSea	LAMC2;LAMC2
635	cg04109663	3.9e-05	0.0402417	0.745121	0.800608	-0.0554872	1	184594687	-	OpenSea	C1orf21
1892	cg26428191	0.000229515	0.0797683	0.769601	0.6705	0.0991006	1	185380011	+	OpenSea					TRUE
839	cg20487890	6.33e-05	0.0494944	0.843662	0.883214	-0.0395521	1	185402344	+	OpenSea
1596	cg13107428	0.000177541	0.0731239	0.0346055	0.0293865	0.00521895	1	197744541	+	Island	DENND1B;DENND1B;DENND1B;DENND1B	high-CpG:196010757-196011580
731	cg17939001	5.03e-05	0.0452307	0.0257217	0.0197912	0.00593055	1	197871836	+	Island	C1orf53
2323	cg05949385	0.000315277	0.0891098	0.686057	0.750476	-0.0644189	1	199984216	+	OpenSea
1782	cg11718780	0.000210563	0.0776768	0.665094	0.708438	-0.0433438	1	200728684	+	OpenSea	CAMSAP1L1				TRUE
1364	cg26344104	0.000138434	0.0666419	0.0291313	0.0242383	0.00489308	1	201951974	-	Island	RNPEP
154	cg04245630	4.24e-06	0.0175502	0.683914	0.571657	0.112257	1	202317365	-	N_Shore	PPP1R12B;PPP1R12B;PPP1R12B;PPP1R12B
87	cg01548178	1.29e-06	0.00969642	0.0271693	0.0185738	0.00859547	1	202679728	+	Island	SYT2			DMR	TRUE
1619	cg17823829	0.000181287	0.0736312	0.902784	0.878671	0.0241131	1	202765754	-	OpenSea	KDM5B				TRUE
2616	cg24744425	0.000379436	0.0953639	0.0177587	0.0153538	0.0024049	1	202858153	+	Island	RABIF
639	cg19824396	3.91e-05	0.0402417	0.689651	0.788704	-0.0990526	1	203018871	-	OpenSea	PPFIA4
826	cg10017641	6.05e-05	0.048158	0.700231	0.768464	-0.0682327	1	203606297	-	OpenSea	ATP2B4;ATP2B4				TRUE
1205	cg11461761	0.000111257	0.0606743	0.721457	0.608848	0.112609	1	203783946	-	OpenSea	ZC3H11A
1358	cg24546153	0.000137773	0.0666419	0.0417657	0.0369389	0.00482681	1	203830887	-	Island	SNRPE	high-CpG:202097346-202097622
1989	cg20136584	0.000248951	0.0823039	0.0260967	0.0226326	0.00346414	1	204121503	+	S_Shore	ETNK2
454	cg25320668	2.37e-05	0.0341701	0.0377477	0.0275613	0.0101864	1	205196970	+	Island	TMCC2
384	cg07924540	1.79e-05	0.0305908	0.732531	0.787277	-0.0547464	1	211731629	+	OpenSea
1502	cg13658070	0.000160426	0.0701776	0.0162321	0.0131681	0.00306398	1	211752298	-	Island	SLC30A1	high-CpG:209818426-209819260
1016	cg22513166	8.29e-05	0.0536278	0.279001	0.30945	-0.030449	1	212476869	-	OpenSea	PPP2R5A;PPP2R5A
2050	cg13408549	0.00026293	0.0843114	0.0233494	0.0181951	0.00515426	1	212781792	-	Island	ATF3;ATF3;ATF3;ATF3;ATF3
2186	cg26381322	0.000291478	0.0876793	0.0757166	0.0494334	0.0262832	1	212873244	+	Island	BATF3;BATF3	high-CpG:210939733-210939957
548	cg17906245	3.16e-05	0.0378323	0.75621	0.812926	-0.0567159	1	213021979	-	OpenSea	C1orf227
1407	cg01770831	0.000145627	0.0680186	0.0750394	0.0531559	0.0218835	1	214454661	+	Island	SMYD2
2858	cg17130063	0.000432749	0.0995669	0.0315997	0.0260219	0.00557784	1	215256448	+	Island	KCNK2;KCNK2;KCNK2
573	cg11380323	3.33e-05	0.0382042	0.837173	0.880816	-0.0436427	1	220534666	+	OpenSea
2592	cg14985987	0.000375066	0.0951189	0.0183501	0.0150277	0.0033224	1	222763457	+	S_Shore	TAF1A;TAF1A
828	cg16028934	6.11e-05	0.0484996	0.038839	0.0293907	0.0094483	1	224034222	+	Island	TP53BP2;TP53BP2
721	cg02874296	4.85e-05	0.0441904	0.0198825	0.0139407	0.0059418	1	224370786	-	Island	DEGS1
1031	cg25195309	8.51e-05	0.054306	0.672706	0.732579	-0.0598736	1	225766155	-	OpenSea	ENAH;ENAH				TRUE
2361	cg16291455	0.000320453	0.0892229	0.752197	0.777235	-0.0250386	1	225990432	+	OpenSea
2196	cg25345767	0.000293971	0.087922	0.0528507	0.0386062	0.0142445	1	226070210	+	Island	TMEM63A;TMEM63A
1786	cg13572638	0.000211724	0.077906	0.894468	0.929754	-0.0352857	1	227173653	+	OpenSea	CABC1
278	cg24070990	1.06e-05	0.025161	0.774216	0.808298	-0.0340818	1	228634724	-	S_Shore
1881	cg12052812	0.00022722	0.0794328	0.0512748	0.0486891	0.00258566	1	230778592	+	Island	COG2;COG2
2329	cg09308842	0.00031606	0.0891098	0.0764157	0.0622175	0.0141982	1	231297968	-	Island	TRIM67			DMR
2190	cg10222947	0.000292834	0.0879188	0.0928285	0.0950363	-0.0022077	1	231472757	+	N_Shore	EXOC8;SPRTN;SPRTN;SPRTN
2837	cg26422975	0.000427517	0.0990808	0.0276795	0.0221242	0.00555533	1	231473532	+	Island	EXOC8;C1orf124;EXOC8;C1orf124
617	cg18859459	3.7e-05	0.039321	0.71587	0.750988	-0.0351176	1	233753276	+	S_Shelf	KCNK1
164	cg04786142	4.38e-06	0.0175502	0.154605	0.0846326	0.0699721	1	234908381	+	OpenSea			chr1:234908151-234908151	DMR
1217	cg24846594	0.000112922	0.0609618	0.0140661	0.0122738	0.0017923	1	236687271	+	Island	LGALS8;LGALS8;LGALS8;LGALS8;LGALS8	high-CpG:234753864-234753946
2202	cg19140682	0.000294914	0.087922	0.0311403	0.0207499	0.0103904	1	236849656	-	Island	ACTN2;ACTN2;ACTN2
2194	cg17418304	0.000293879	0.087922	0.0142986	0.0120216	0.00227701	1	236958601	-	Island	MTR;MTR	high-CpG:235025162-235025573
2386	cg24690236	0.000325957	0.0897599	0.956579	0.967941	-0.0113625	1	237729917	-	OpenSea	RYR2
1080	cg07437492	9.25e-05	0.0562901	0.661121	0.722782	-0.0616608	1	240434057	+	OpenSea	FMN2;FMN2		chr1:240433849-240433849
1278	cg18894526	0.000123065	0.0633207	0.0275407	0.0217867	0.00575396	1	241682667	+	Island	FH
742	cg21397993	5.15e-05	0.0456744	0.0445869	0.0343268	0.0102602	1	243418055	-	Island	CEP170;SDCCAG8;CEP170;CEP170
2466	cg00081019	0.000343958	0.0916811	0.974466	0.97937	-0.00490368	1	243658800	+	OpenSea	SDCCAG8;AKT3
854	cg01177928	6.47e-05	0.0497386	0.0307229	0.0243231	0.00639981	1	244893571	+	Island					TRUE
2718	cg01084500	0.000402693	0.097424	0.84643	0.862175	-0.015745	1	244973602	-	OpenSea
203	cg00315628	6.28e-06	0.0202391	0.747061	0.786184	-0.0391229	1	245297880	+	OpenSea
551	cg01787565	3.17e-05	0.0378323	0.0138654	0.01143	0.00243534	1	245318209	+	Island	KIF26B	high-CpG:243384542-243385077
322	cg10588706	1.31e-05	0.0266919	0.755959	0.824724	-0.0687652	1	246305649	-	OpenSea	SMYD3;SMYD3
401	cg25726269	1.95e-05	0.0319076	0.96614	0.974042	-0.00790186	1	246943745	-	OpenSea
2205	cg10155695	0.000295006	0.087922	0.931284	0.946584	-0.0152997	1	247582028	+	OpenSea	NLRP3;NLRP3;NLRP3;NLRP3;NLRP3;NLRP3;NLRP3;NLRP3;NLRP3;NLRP3
2438	cg18109879	0.000337643	0.0910651	0.73218	0.560209	0.171971	1	247979148	-	OpenSea	OR14A16
1348	cg20434529	0.000134886	0.0657991	0.168514	0.158392	0.0101225	1	248100345	+	Island	OR2L13
1207	cg02899039	0.0001115	0.0607448	0.012248	0.0109092	0.00133873	1	249152378	-	N_Shore	ZNF692;ZNF692	high-CpG:247118926-247119942			TRUE
1779	cg14984664	0.000210156	0.0776768	0.866098	0.907578	-0.0414804	2	443338	+	OpenSea
787	cg21463554	5.54e-05	0.0461814	0.946595	0.957957	-0.0113627	2	495912	-	N_Shore
117	cg04726702	2.47e-06	0.0138498	0.911233	0.941551	-0.030318	2	557669	+	N_Shore
175	cg18438461	4.9e-06	0.0183446	0.758164	0.852051	-0.0938867	2	1606016	+	OpenSea
2829	cg25181651	0.000426003	0.0989762	0.0254697	0.0201477	0.005322	2	1748132	+	Island	PXDN			DMR
2702	cg01821656	0.000399922	0.097275	0.730541	0.786637	-0.0560964	2	2190118	+	Island	MYT1L
799	cg20324516	5.72e-05	0.0470833	0.687273	0.750196	-0.0629236	2	3137154	+	OpenSea
1283	cg14813458	0.00012356	0.0633276	0.912123	0.935344	-0.0232204	2	3493699	+	OpenSea
374	cg22119716	1.68e-05	0.0295178	0.65732	0.596954	0.0603663	2	3497214	+	OpenSea					TRUE
733	cg27218469	5.05e-05	0.0453038	0.0432771	0.0329781	0.010299	2	7005960	-	Island	CMPK2	high-CpG:6923374-6923422
2211	cg13432421	0.000295849	0.0879714	0.874442	0.836909	0.0375326	2	8357649	+	OpenSea	LINC00299		chr2:8357542-8357542		TRUE
2536	cg21382589	0.00035818	0.0928739	0.977352	0.980626	-0.00327399	2	8785969	+	Island
2581	cg21772679	0.000371797	0.0947238	0.0290556	0.0220276	0.00702801	2	8819227	-	Island	ID2-AS1
831	cg02699694	6.14e-05	0.0486097	0.01153	0.0103002	0.0012298	2	9144246	+	Island	MBOAT2
236	cg06201173	8.29e-06	0.0230097	0.72553	0.778329	-0.0527992	2	9240855	-	OpenSea
1777	cg19105810	0.000209965	0.0776768	0.0145609	0.0116829	0.00287802	2	9346698	-	Island	ASAP2;ASAP2
2320	cg13802740	0.000314957	0.0891098	0.168587	0.126829	0.0417581	2	9770727	+	Island	YWHAQ	high-CpG:9687956-9688692
1012	cg06349981	8.22e-05	0.053403	0.0427707	0.0286797	0.0140909	2	10443745	-	Island	HPCAL1;HPCAL1
1347	cg25472172	0.000134866	0.0657991	0.614588	0.701507	-0.0869185	2	11685235	+	OpenSea	GREB1;GREB1;GREB1
2501	cg13488090	0.000350497	0.0921536	0.704011	0.789968	-0.0859574	2	11898503	-	OpenSea	LPIN1;LPIN1;LPIN1;LPIN1
727	cg25074809	4.92e-05	0.0445445	0.861633	0.838415	0.0232183	2	16086016	+	S_Shelf	MYCN
654	cg15101447	4.1e-05	0.041155	0.704824	0.759887	-0.0550636	2	17305318	-	OpenSea
660	cg01674818	4.19e-05	0.0414401	0.696713	0.756849	-0.0601363	2	17966329	+	OpenSea	GEN1;GEN1
2349	cg18705408	0.000318875	0.089179	0.020697	0.0173597	0.00333727	2	20212524	+	Island	MATN3	high-CpG:20075904-20076384			TRUE
1790	cg18740718	0.000212161	0.077906	0.0197595	0.0165475	0.00321207	2	24346220	+	Island	PFN4;LOC375190
2561	cg19988770	0.000366606	0.0941307	0.0164283	0.0136315	0.00279687	2	25016434	+	Island	CENPO;C2orf79
2279	cg08471319	0.000306344	0.0883907	0.909271	0.943033	-0.0337616	2	25141735	-	N_Shore	ADCY3
2052	cg25044635	0.00026335	0.0843912	0.0281188	0.0239362	0.00418259	2	25565267	+	Island	DNMT3A;DNMT3A;DNMT3A
630	cg21708767	3.83e-05	0.0400114	0.0207054	0.0179822	0.0027232	2	25565514	+	Island	DNMT3A;DNMT3A;DNMT3A	high-CpG:25418819-25419319
2350	cg11359770	0.00031892	0.089179	0.679925	0.714202	-0.0342764	2	26304137	-	OpenSea	RAB10
302	cg02096396	1.19e-05	0.0260086	0.0302828	0.0220197	0.00826312	2	26395556	+	Island	FAM59B
552	cg06740598	3.18e-05	0.0378802	0.012713	0.0107335	0.00197957	2	26467551	+	Island	HADHB;HADHA;HADHA	high-CpG:26320972-26321168
223	cg01192325	7.29e-06	0.0214951	0.665782	0.753931	-0.0881483	2	26689235	-	OpenSea	OTOF;OTOF;OTOF;OTOF;OTOF
2360	cg22908266	0.000320433	0.0892229	0.0143369	0.0119718	0.00236509	2	27273008	+	Island	AGBL5;AGBL5
2102	cg11897304	0.000276466	0.0864431	0.0316044	0.025638	0.00596639	2	27546037	+	OpenSea	MPV17
520	cg07150314	2.87e-05	0.0363459	0.0122903	0.00997975	0.00231054	2	27579984	+	Island	GTF3C2;GTF3C2
1090	cg06716807	9.43e-05	0.0568383	0.0291947	0.022179	0.00701569	2	27632449	-	Island	PPM1G;PPM1G;PPM1G	high-CpG:27485817-27486067
2611	cg15243024	0.000378053	0.0951883	0.0154539	0.0125627	0.00289127	2	27651571	-	Island	NRBP1;NRBP1	high-CpG:27504953-27505431
349	cg15781375	1.54e-05	0.0290024	0.0701444	0.0477936	0.0223508	2	27651918	-	Island	NRBP1	high-CpG:27504953-27505431
2303	cg22732812	0.000312171	0.0891098	0.0167996	0.0146115	0.00218806	2	27717801	-	Island	FNDC4;FNDC4
1426	cg04015759	0.000147926	0.0682129	0.0331131	0.0267568	0.00635629	2	27718181	+	Island	FNDC4
1926	cg26251429	0.000237278	0.0810107	0.053082	0.0399228	0.0131592	2	28113398	+	Island	BRE;BRE;BRE;RBKS;BRE;LOC100302650;BRE
1752	cg21583226	0.000203877	0.07652	0.0264944	0.0215216	0.00497284	2	31360693	+	Island	GALNT14			DMR	TRUE
43	cg04525212	4.65e-07	0.00708837	0.0459498	0.0382666	0.00768317	2	36582931	-	Island	CRIM1	high-CpG:36436316-36436616
85	cg13898875	1.27e-06	0.00969642	0.876257	0.886328	-0.0100704	2	36980923	-	OpenSea	VIT				TRUE
2221	cg03648789	0.000297395	0.087994	0.0324908	0.0249363	0.00755447	2	38304037	-	Island	CYP1B1				TRUE
957	cg24745207	7.58e-05	0.0520818	0.864978	0.891889	-0.0269118	2	38366225	-	OpenSea	CYP1B1-AS1
1186	cg01906032	0.000107007	0.0593291	0.777453	0.831295	-0.0538423	2	38743425	+	OpenSea	LOC101929596
1572	cg09286090	0.000173287	0.0724546	0.0385618	0.0282446	0.0103172	2	39351732	+	Island
608	cg09493654	3.61e-05	0.0390684	0.709307	0.767954	-0.0586469	2	39715532	-	OpenSea	LOC728730
114	cg13471352	2.43e-06	0.0138498	0.934445	0.94982	-0.0153745	2	39944470	-	OpenSea	TMEM178;TMEM178
564	cg12271759	3.26e-05	0.0379527	0.806459	0.853827	-0.0473676	2	40468548	-	OpenSea	SLC8A1;SLC8A1;SLC8A1;SLC8A1				TRUE
2848	cg06493695	0.000430189	0.0992983	0.940777	0.954501	-0.0137233	2	42565378	+	OpenSea
2051	cg10571901	0.000262973	0.0843114	0.851599	0.875716	-0.0241173	2	43295303	-	Island					TRUE
106	cg03443205	2.13e-06	0.0132099	0.0672587	0.0425023	0.0247563	2	43454133	+	Island	LOC100129726;ZFP36L2	high-CpG:43305097-43307854
821	cg05961294	6.01e-05	0.0479671	0.43696	0.276876	0.160084	2	45028264	-	N_Shore				RDMR
549	cg20881074	3.17e-05	0.0378323	0.052139	0.034874	0.017265	2	45236659	+	Island	SIX2			DMR
2304	cg09526912	0.000312724	0.0891098	0.0410211	0.0291205	0.0119006	2	45237431	+	Island	SIX2		chr2:45237112-45237112	DMR
2346	cg02711647	0.000318555	0.089179	0.0309842	0.0247764	0.00620787	2	45237689	-	Island	SIX2			DMR
1212	cg15194439	0.000112033	0.0607835	0.027154	0.0236052	0.00354882	2	47168622	+	Island	TTC7A;TTC7A;TTC7A;TTC7A;TTC7A;MCFD2;MCFD2;TTC7A;TTC7A
214	cg00423987	7.06e-06	0.0214411	0.715416	0.793753	-0.0783367	2	47712095	+	OpenSea
433	cg16595246	2.2e-05	0.0333145	0.0365842	0.0274053	0.00917885	2	48009933	+	Island	MSH6
2695	cg09919124	0.00039786	0.0970763	0.029562	0.0258491	0.00371287	2	48132411	-	N_Shore	FBXO11
2096	cg23652927	0.000275504	0.086327	0.656972	0.707979	-0.0510065	2	55479688	+	OpenSea	MTIF2;MTIF2
2835	cg18675644	0.000427056	0.0990542	0.793534	0.824699	-0.0311645	2	61634300	+	OpenSea	USP34
348	cg08949862	1.53e-05	0.0289869	0.0728048	0.0423683	0.0304365	2	63277672	+	Island	OTX1
2483	cg01739965	0.000347403	0.0920021	0.0852813	0.060868	0.0244132	2	64246297	+	Island	VPS54;VPS54
1474	cg10159582	0.000156932	0.0699679	0.0214222	0.0176871	0.00373511	2	65283322	-	Island	CEP68
2566	cg00451501	0.000369319	0.0946425	0.838601	0.857702	-0.0191008	2	65334388	+	OpenSea	RAB1A;RAB1A
1664	cg15811753	0.000188537	0.0745048	0.0196883	0.0169802	0.00270809	2	65454775	-	Island	ACTR2;ACTR2
50	cg07458698	5.73e-07	0.00708837	0.0306852	0.0251507	0.00553441	2	67624494	+	Island	ETAA1;ETAA1
461	cg14944152	2.4e-05	0.0342126	0.794458	0.849872	-0.0554139	2	68394955	-	OpenSea	PNO1
2607	cg23021855	0.000377601	0.0951883	0.0269806	0.0234001	0.00358049	2	68695071	+	Island	APLF;FBXO48
1569	cg25719132	0.000173163	0.0724546	0.0197104	0.0163517	0.00335863	2	70520671	+	Island	SNRPG
2020	cg22976360	0.000256515	0.0835033	0.0409341	0.0317281	0.009206	2	70528671	-	Island	FAM136A
2692	cg04670005	0.000396652	0.0968894	0.0176837	0.0151292	0.00255443	2	70780908	-	Island	TGFA;TGFA;TGFA;TGFA				TRUE
1189	cg16781647	0.000108946	0.0601829	0.0501032	0.0272477	0.0228556	2	73151595	-	Island	EMX1			DMR
1425	cg06863239	0.000147685	0.0681494	0.816468	0.870659	-0.0541914	2	73301011	+	S_Shore	RAB11FIP5
240	cg12789718	8.66e-06	0.0236475	0.860784	0.888118	-0.0273342	2	74119362	+	OpenSea	ACTG2;ACTG2
2317	cg01269456	0.000314397	0.0891098	0.0111082	0.0094357	0.00167245	2	74154221	-	Island	DGUOK;DGUOK
362	cg17053845	1.62e-05	0.029361	0.0334535	0.0268856	0.00656794	2	74375133	+	Island	BOLA3;BOLA3
586	cg17961057	3.42e-05	0.0383038	0.793946	0.830162	-0.0362157	2	74645699	-	Island	C2orf81
2798	cg12928619	0.000419273	0.0984813	0.0116617	0.00966219	0.0019995	2	74648754	-	Island	WDR54	high-CpG:74502217-74502345
1903	cg18686108	0.000231159	0.0798754	0.0234263	0.0169257	0.00650055	2	74756712	+	Island	AUP1;AUP1;HTRA2;HTRA2;HTRA2;HTRA2;AUP1
897	cg23857238	6.93e-05	0.0507359	0.927616	0.943106	-0.0154901	2	75720345	+	OpenSea	FAM176A;FAM176A
1966	cg16751938	0.000244985	0.0819151	0.0352589	0.0278891	0.00736989	2	75788295	+	Island	FAM176A;FAM176A
1128	cg10365657	9.91e-05	0.0577557	0.93538	0.961409	-0.0260288	2	85051143	+	OpenSea	C2orf89
1806	cg18780276	0.000215349	0.0783541	0.0450736	0.0369177	0.00815597	2	85829672	+	Island	TMEM150A;TMEM150A;TMEM150A	high-CpG:85683111-85683307
576	cg07759770	3.35e-05	0.0382042	0.0359094	0.0312443	0.00466516	2	85839318	-	S_Shore	C2orf68;USP39;USP39;USP39;USP39;USP39
281	cg00002743	1.08e-05	0.025161	0.812405	0.87659	-0.0641845	2	86742476	-	OpenSea	CHMP3;CHMP3;CHMP3;CHMP3;RNF103-CHMP3
7	cg09985075	6.44e-08	0.00411324	0.746835	0.819586	-0.0727508	2	86743517	+	OpenSea	CHMP3;CHMP3;CHMP3;CHMP3;RNF103-CHMP3
2233	cg26894509	0.000298866	0.0880095	0.0301208	0.0246808	0.00543995	2	86851090	-	Island	RNF103;RNF103;RNF103;RNF103-CHMP3
93	cg27158243	1.48e-06	0.0103947	0.833286	0.869402	-0.0361167	2	88823616	-	OpenSea	TEX37
856	cg07032414	6.5e-05	0.0497997	0.606662	0.705086	-0.0984235	2	89137427	+	OpenSea
753	cg21179914	5.3e-05	0.0461814	0.837927	0.870385	-0.0324579	2	90248207	+	OpenSea
579	cg00710180	3.37e-05	0.038221	0.829946	0.844328	-0.014382	2	95723453	-	OpenSea
514	cg13825663	2.82e-05	0.0360111	0.0212576	0.0173241	0.00393349	2	96873994	-	Island	STARD7	high-CpG:96237720-96237824
1193	cg02858320	0.000109714	0.0604203	0.0243735	0.0193368	0.00503671	2	96874801	+	Island	STARD7
2431	cg17149980	0.000336755	0.0910303	0.107984	0.0635467	0.044437	2	97426598	-	N_Shore	CNNM4	high-CpG:96790298-96790655
2715	cg14232643	0.000401981	0.0973593	0.0228866	0.0179573	0.00492933	2	97481853	+	Island	CNNM3;CNNM3
1387	cg03974985	0.000142633	0.0675777	0.0121806	0.0105229	0.00165773	2	98612359	-	Island	TMEM131	high-CpG:97978454-97979159
1574	cg14661464	0.000173555	0.0725062	0.0149455	0.0131734	0.00177201	2	99953763	+	Island	TXNDC9;EIF5B	high-CpG:99320181-99320351
1071	cg10529075	9.13e-05	0.056045	0.0359971	0.0271299	0.00886718	2	101436412	-	Island	NPAS2
1403	cg02805052	0.000145065	0.0679465	0.75722	0.782041	-0.0248213	2	104973361	-	OpenSea
2866	cg03414474	0.000434775	0.0997539	0.0257448	0.0173589	0.00838581	2	105488932	-	Island
1672	cg25665203	0.000190186	0.074708	0.79512	0.818907	-0.0237873	2	106577910	+	OpenSea
543	cg12987799	3.12e-05	0.037731	0.8756	0.91029	-0.03469	2	106889860	+	S_Shelf
2016	cg04391610	0.00025599	0.0834865	0.703698	0.769573	-0.0658747	2	109223537	+	OpenSea	LIMS1;LIMS1;LIMS1;LIMS1
457	cg06983551	2.37e-05	0.0341701	0.109388	0.0805917	0.0287964	2	111435583	-	Island	BUB1;BUB1
884	cg21571602	6.71e-05	0.0499455	0.72251	0.777075	-0.0545649	2	113035598	-	S_Shelf	ZC3H6
2291	cg19120943	0.000309077	0.0887078	0.762895	0.798441	-0.0355461	2	113304419	+	OpenSea	POLR1B;POLR1B;POLR1B;POLR1B;POLR1B;POLR1B;POLR1B
677	cg04260930	4.35e-05	0.0421546	0.814737	0.859153	-0.0444151	2	114461702	+	OpenSea
888	cg20804050	6.78e-05	0.0501965	0.0263782	0.0170216	0.00935666	2	119605441	-	Island	EN1;EN1			DMR
1741	cg20971967	0.000201142	0.0759706	0.0143922	0.0118499	0.0025423	2	120770454	+	Island	EPB41L5;EPB41L5;EPB41L5;EPB41L5
1457	cg09077819	0.000154187	0.0695873	0.723097	0.771591	-0.0484935	2	120776501	+	OpenSea	EPB41L5;EPB41L5;EPB41L5;EPB41L5
977	cg00278785	7.85e-05	0.0526705	0.833303	0.872338	-0.0390358	2	121139431	-	OpenSea
1873	cg16745091	0.000225381	0.0790958	0.918962	0.943316	-0.0243547	2	122176233	+	OpenSea	CLASP1;CLASP1;CLASP1
999	cg02473600	8.05e-05	0.0529612	0.0166768	0.0139639	0.00271286	2	128173750	-	Island			chr2:128173465-128173465		TRUE
2704	cg17144508	0.000400006	0.097275	0.0368273	0.0314323	0.00539506	2	128283727	+	Island	IWS1
2863	cg25898483	0.000434233	0.0997339	0.0342593	0.0308428	0.00341643	2	128848595	-	N_Shore	UGGT1;UGGT1
1668	cg05156062	0.000189289	0.0746225	0.0284928	0.023694	0.00479879	2	135676290	-	Island	CCNT2-AS1;CCNT2;CCNT2;CCNT2
25	cg17300353	2.34e-07	0.00614193	0.0836303	0.0554187	0.0282116	2	137522211	+	N_Shore				DMR
2352	cg09724271	0.000319087	0.089179	0.722628	0.765077	-0.0424491	2	144969767	-	OpenSea	GTDC1;GTDC1;GTDC1;GTDC1;GTDC1;GTDC1;GTDC1
2403	cg04612985	0.000330639	0.0904461	0.881735	0.880519	0.00121668	2	145929476	+	OpenSea
2801	cg08385422	0.000419623	0.0984813	0.0235354	0.018599	0.00493638	2	148602078	-	Island	ACVR2A;ACVR2A;ACVR2A	high-CpG:148318486-148318803;high-CpG:148318520-148318770
2082	cg12931682	0.000271864	0.0858641	0.0254662	0.0216842	0.00378207	2	149895553	-	Island	LYPD6B
185	cg24046770	5.64e-06	0.0197875	0.846078	0.885454	-0.0393758	2	152263618	-	N_Shelf
1890	cg21338532	0.000229477	0.0797683	0.0195516	0.0173362	0.00221545	2	154335348	-	Island	RPRM			DMR	TRUE
443	cg14230859	2.29e-05	0.0339545	0.653385	0.72812	-0.0747347	2	157291402	-	N_Shore	GPD2;GPD2
1140	cg18009959	0.000100652	0.0580578	0.652798	0.704202	-0.0514044	2	158711965	+	OpenSea	ACVR1;ACVR1
84	cg05835573	1.25e-06	0.00969642	0.724317	0.791348	-0.0670314	2	159650648	-	OpenSea	DAPL1
691	cg24664570	4.5e-05	0.0427519	0.0502499	0.0367129	0.013537	2	159825143	-	Island	TANC1;TANC1	high-CpG:159533329-159533458
1045	cg06911002	8.71e-05	0.0548202	0.723011	0.765035	-0.0420238	2	160408618	-	OpenSea	BAZ2B;BAZ2B
1673	cg09248944	0.000190387	0.074708	0.0481581	0.0324477	0.0157104	2	160654499	-	Island	CD302
1293	cg10985993	0.000124971	0.063508	0.0176165	0.0146384	0.00297807	2	166810260	+	Island	TTC21B;TTC21B	high-CpG:166518504-166518595
295	cg03241046	1.14e-05	0.0254933	0.562076	0.656231	-0.0941556	2	166881390	-	OpenSea	SCN1A;SCN1A;SCN1A
1644	cg13644846	0.000185561	0.0742211	0.545327	0.643936	-0.0986091	2	169311373	+	N_Shore	CERS6;CERS6
2065	cg11513485	0.000266607	0.084897	0.708418	0.616914	0.0915047	2	169496681	+	OpenSea	LASS6				TRUE
1773	cg15617548	0.00020954	0.0776764	0.169966	0.0981068	0.071859	2	171785815	-	Island	GORASP2;GORASP2	high-CpG:171493870-171494082
515	cg20361600	2.82e-05	0.0360111	0.0300513	0.0249548	0.0050965	2	172967608	-	Island	DLX2	high-CpG:172675300-172675878			TRUE
592	cg08721076	3.48e-05	0.0385384	0.0116742	0.0104557	0.00121847	2	172967670	+	Island	DLX2				TRUE
989	cg13462525	7.98e-05	0.0527569	0.627929	0.556556	0.0713729	2	173420046	+	N_Shore	PDK1;PDK1;PDK1;PDK1
705	cg11703569	4.63e-05	0.0431954	0.0224673	0.017646	0.00482125	2	173421320	-	Island	PDK1;PDK1;PDK1;PDK1
1523	cg25075147	0.000164942	0.0712154	0.0139394	0.0115662	0.00237322	2	175547399	+	Island	WIPF1	high-CpG:175255629-175256284
2574	cg26082400	0.000371058	0.0946956	0.0236597	0.0194304	0.00422923	2	178483837	+	S_Shore	TTC30A
1023	cg05191651	8.39e-05	0.0539211	0.60929	0.675577	-0.0662868	2	178540201	+	OpenSea	PDE11A;PDE11A;PDE11A;PDE11A;PDE11A;PDE11A;PDE11A;PDE11A
679	cg13151361	4.39e-05	0.0424111	0.643841	0.718038	-0.0741972	2	179298300	+	OpenSea	PRKRA;MIR548N;PRKRA;PRKRA
1154	cg03355952	0.000103194	0.0588018	0.0695963	0.0474339	0.0221624	2	179316072	+	Island	PRKRA;PRKRA;PRKRA;DFNB59;MIR548N
1025	cg17819702	8.44e-05	0.0541105	0.0172697	0.0146825	0.00258723	2	180128907	-	Island	SESTD1
2613	cg27184646	0.000378347	0.0952122	0.553511	0.701536	-0.148025	2	181919236	+	OpenSea	UBE2E3;UBE2E3;UBE2E3;UBE2E3
865	cg01101876	6.58e-05	0.0499208	0.0250341	0.0188687	0.00616533	2	183580910	+	Island	DNAJC10	high-CpG:183289064-183289434
744	cg14997582	5.18e-05	0.0457585	0.6884	0.767362	-0.078961	2	190611870	+	OpenSea	OSGEPL1
2115	cg02090437	0.000278951	0.0867188	0.0505598	0.0349296	0.0156303	2	191208625	+	Island	INPP1;INPP1;INPP1;INPP1	high-CpG:190916515-190917020
1429	cg09237843	0.000148523	0.0683445	0.0218149	0.018336	0.00347887	2	193060603	-	Island	TMEFF2;TMEFF2;TMEFF2			CDMR
1961	cg12995897	0.000243936	0.0817975	0.721934	0.786153	-0.0642188	2	196372688	+	OpenSea
1311	cg26535835	0.000128983	0.0646043	0.0181839	0.0158811	0.0023028	2	197036297	-	Island	STK17B;STK17B	high-CpG:196744525-196744567
447	cg25114580	2.31e-05	0.0339774	0.0310773	0.0213032	0.00977419	2	198364757	+	Island	HSPE1;HSPE1;HSPD1;HSPD1
2781	cg26995744	0.00041618	0.0983804	0.0117768	0.0105316	0.00124516	2	200322034	+	Island	SATB2
2136	cg04508851	0.000282827	0.0869799	0.901122	0.93947	-0.0383479	2	201334576	-	OpenSea	SPATS2L;SPATS2L;SPATS2L;SPATS2L;SPATS2L;SPATS2L;SPATS2L
1400	cg03429512	0.000144544	0.0678914	0.684894	0.601334	0.0835605	2	203140700	+	OpenSea	NOP58;SNORD70
1446	cg10258931	0.000151511	0.0688431	0.88334	0.899145	-0.015805	2	203639072	+	Island	ICA1L
2619	cg23888375	0.000380011	0.0953639	0.12913	0.0936728	0.0354568	2	203776317	-	N_Shore	ALS2CR8;WDR12;ALS2CR8;WDR12
2280	cg01556888	0.000307013	0.0884971	0.0175061	0.0143047	0.00320139	2	204192982	-	Island	ABI2;ABI2;ABI2;ABI2;ABI2;ABI2;ABI2;ABI2	high-CpG:203901160-203901600
1774	cg06752549	0.000209557	0.0776764	0.816135	0.833605	-0.0174702	2	206848820	-	OpenSea
1428	cg22238304	0.000148441	0.0683445	0.625341	0.671177	-0.0458356	2	206981412	+	OpenSea	LOC100329109
400	cg01399068	1.95e-05	0.0319076	0.0380732	0.0269953	0.0110779	2	207630025	-	Island	FASTKD2;MDH1B;MDH1B;FASTKD2;FASTKD2
1695	cg09120749	0.000192573	0.074708	0.208833	0.161704	0.047129	2	211442722	-	OpenSea	CPS1;CPS1
1094	cg20618167	9.48e-05	0.0569592	0.75697	0.800105	-0.0431353	2	215823747	+	OpenSea	ABCA12;ABCA12;ABCA12;LOC101928103;ABCA12;ABCA12;ABCA12
2693	cg21595549	0.000396822	0.0968939	0.779061	0.813804	-0.0347425	2	217045817	+	OpenSea	XRCC5				TRUE
257	cg01571560	9.77e-06	0.024908	0.901019	0.929367	-0.0283473	2	217517178	+	OpenSea	IGFBP2				TRUE
264	cg10165071	1.01e-05	0.0250081	0.0308212	0.0434402	-0.012619	2	217557160	+	Island	IGFBP5
67	cg23409591	7.91e-07	0.00769013	0.880212	0.921121	-0.040909	2	217675198	-	Island
1927	cg04381898	0.00023746	0.0810307	0.0225457	0.0186547	0.00389102	2	219082190	+	S_Shore	ARPC2;ARPC2;ARPC2
2710	cg01231021	0.000401642	0.0973593	0.725709	0.785499	-0.0597898	2	219211456	+	OpenSea	PNKD;PNKD;CATIP-AS2
2037	cg01506492	0.000260192	0.0839391	0.0436294	0.0294829	0.0141465	2	219232590	+	Island	C2orf62
1648	cg16870607	0.000186739	0.0743365	0.694715	0.753738	-0.0590222	2	219246302	-	OpenSea	SLC11A1
1516	cg05314776	0.000162908	0.070648	0.892448	0.910431	-0.0179837	2	219575073	-	N_Shore	TTLL4
994	cg15680624	7.98e-05	0.0527569	0.0156401	0.0129432	0.00269687	2	219858132	-	Island	CRYBA2;CRYBA2;CRYBA2				TRUE
1469	cg03546879	0.000156069	0.0698611	0.0443014	0.0371746	0.00712681	2	220094399	+	Island	ATG9A;ANKZF1;ANKZF1;ATG9A
2455	cg18338495	0.000340547	0.0912079	0.0233196	0.0192521	0.00406747	2	220110107	+	Island	STK16;GLB1L;GLB1L;STK16
1694	cg03927520	0.000192475	0.074708	0.0259724	0.0184478	0.00752452	2	220110237	-	Island	GLB1L;GLB1L;STK16;STK16;STK16
1905	cg21332408	0.000231869	0.0800366	0.0106223	0.00862318	0.00199911	2	220118883	-	Island	TUBA4A;TUBA4B;TUBA4A;TUBA4A
494	cg24411913	2.64e-05	0.0349968	0.0166705	0.0138772	0.00279332	2	220159774	+	Island	PTPRN;MIR153-1
2234	cg20305095	0.000299138	0.0880493	0.235278	0.163093	0.0721846	2	225388487	+	OpenSea	CUL3;CUL3;CUL3
2497	cg04730276	0.000350129	0.0921536	0.855595	0.885053	-0.0294587	2	228586426	+	S_Shelf
652	cg12339238	4.06e-05	0.0409776	0.145231	0.0927769	0.0524546	2	231729690	-	Island	ITM2C;ITM2C;ITM2C;ITM2C;ITM2C;ITM2C;ITM2C;ITM2C	high-CpG:231437745-231437987
2407	cg11657535	0.00033133	0.0904817	0.619418	0.636594	-0.0171752	2	231925683	+	S_Shelf	PSMD1
535	cg02204630	3.03e-05	0.0371345	0.0225978	0.0180919	0.00450588	2	232394896	+	Island	NMUR1
2595	cg24267344	0.000375373	0.0951189	0.0151425	0.0129487	0.00219378	2	232791147	+	Island	NPPC
1327	cg23904854	0.000131587	0.0652021	0.0355519	0.041681	-0.00612911	2	233498098	-	Island	EFHD1;EFHD1	high-CpG:233206184-233206583		DMR
381	cg04084600	1.76e-05	0.0303284	0.603014	0.638731	-0.0357174	2	235016302	-	OpenSea
756	cg04856858	5.33e-05	0.0461814	0.128126	0.0911051	0.0370204	2	236402015	+	Island	AGAP1;AGAP1
1935	cg26655076	0.000239509	0.0813567	0.855861	0.882658	-0.0267975	2	236720373	+	OpenSea	AGAP1;AGAP1
1478	cg02905251	0.00015761	0.0699679	0.662034	0.729211	-0.0671765	2	237118186	+	N_Shore	ASB18				TRUE
1971	cg02078279	0.000245725	0.0819283	0.682277	0.720293	-0.0380163	2	237298584	+	OpenSea	IQCA1;IQCA1;IQCA1;IQCA1
2135	cg06289479	0.000282626	0.0869799	0.0382488	0.0290842	0.00916464	2	238536058	+	Island	LRRFIP1
1509	cg18844589	0.000161291	0.0702827	0.930436	0.957467	-0.0270304	2	238707052	-	Island	RBM44
299	cg03438090	1.18e-05	0.0258903	0.0277746	0.0194791	0.00829548	2	239143093	+	S_Shelf
964	cg21088485	7.69e-05	0.0524699	0.117398	0.0795651	0.0378331	2	239335541	-	Island	ASB1	high-CpG:239000076-239000462
541	cg08138480	3.08e-05	0.0374283	0.798162	0.841756	-0.0435935	2	239751743	-	N_Shelf
314	cg03395088	1.25e-05	0.0260124	0.963226	0.973097	-0.0098714	2	239959377	+	OpenSea
1475	cg16202803	0.000157338	0.0699679	0.877799	0.914421	-0.0366222	2	240014758	-	OpenSea	HDAC4
855	cg04011897	6.47e-05	0.0497386	0.859865	0.908573	-0.0487079	2	240014762	-	OpenSea	HDAC4
2164	cg10258395	0.000287276	0.0872939	0.938811	0.960147	-0.0213367	2	240026647	-	N_Shelf	HDAC4
1580	cg08356102	0.000175184	0.0728642	0.929208	0.956239	-0.0270309	2	240099720	+	N_Shore	HDAC4
1964	cg22296756	0.000244486	0.0818566	0.950507	0.950843	-0.000336215	2	240305369	-	OpenSea	HDAC4
1136	cg14795697	0.000100097	0.0579407	0.0222386	0.0189057	0.00333291	2	240323028	+	Island	HDAC4
1638	cg25823214	0.000184954	0.0742054	0.0165679	0.0133758	0.00319206	2	241076058	+	S_Shore	MYEOV2;MYEOV2
918	cg26381970	7.17e-05	0.0512108	0.951057	0.965423	-0.0143655	2	241326952	-	OpenSea					TRUE
844	cg16903517	6.36e-05	0.0495407	0.906498	0.934685	-0.0281873	2	241512563	-	Island	RNPEPL1
1299	cg06363516	0.000125616	0.0635715	0.962567	0.971853	-0.00928664	2	241530274	-	Island	CAPN10;CAPN10;CAPN10;CAPN10
656	cg08200420	4.11e-05	0.0412456	0.975318	0.980219	-0.0049008	2	241896967	-	OpenSea
1993	cg24682458	0.000249986	0.0824802	0.149668	0.141177	0.00849149	2	241900099	-	OpenSea	LOC200772		chr2:241899989-241899989		TRUE
243	cg19838074	8.74e-06	0.0236475	0.955463	0.968026	-0.0125629	2	242149865	+	Island	ANO7
2725	cg15456820	0.000405214	0.0977584	0.85165	0.888754	-0.0371041	2	242350781	-	OpenSea	FARP2;FARP2;FARP2				TRUE
557	cg00744550	3.22e-05	0.0379527	0.958291	0.971088	-0.0127964	2	242609941	-	S_Shelf	ATG4B;ATG4B
1928	cg17148467	0.000237757	0.0810902	0.0218213	0.0169852	0.00483615	2	242641476	+	Island	ING5;ING5
1067	cg26226254	9.06e-05	0.0557963	0.84508	0.867346	-0.022266	3	2319891	-	OpenSea	CNTN4				TRUE
103	cg18768347	2.05e-06	0.0130254	0.963511	0.974424	-0.0109134	3	5024849	-	Island	BHLHE40
2541	cg15152958	0.000359383	0.092996	0.825503	0.851967	-0.0264643	3	9369039	-	OpenSea
498	cg09217023	2.65e-05	0.0349979	0.609711	0.681027	-0.0713161	3	9394237	+	OpenSea					TRUE
284	cg04475307	1.09e-05	0.025161	0.847086	0.895148	-0.0480627	3	9694905	+	S_Shelf	MTMR14;MTMR14;MTMR14
2719	cg17285536	0.00040314	0.0974962	0.0133129	0.0114121	0.00190086	3	9791531	+	Island	OGG1;OGG1;OGG1;OGG1;OGG1;OGG1;OGG1;OGG1
153	cg12340314	4.23e-06	0.0175502	0.797916	0.882409	-0.0844939	3	10105099	+	OpenSea	FANCD2;FANCD2
1318	cg14227821	0.00012995	0.0647993	0.945959	0.956038	-0.0100788	3	11135720	-	OpenSea
722	cg19989989	4.88e-05	0.0444475	0.707572	0.626755	0.0808168	3	11588555	-	OpenSea	ATG7;ATG7;ATG7
2227	cg16937078	0.000298404	0.0880095	0.889944	0.899237	-0.00929335	3	12044724	+	N_Shore	SYN2;SYN2
2191	cg10676442	0.000292943	0.0879188	0.0230962	0.017527	0.00556922	3	12525808	-	Island	TSEN2;TSEN2;TSEN2;TSEN2;TSEN2
1378	cg26785250	0.000141703	0.0675522	0.0153841	0.0126976	0.00268657	3	13461660	-	Island	NUP210	high-CpG:13436559-13436892
2387	cg10061496	0.000326029	0.0897599	0.0211587	0.0169446	0.00421402	3	13521655	-	Island	HDAC11;HDAC11-AS1;HDAC11
1584	cg23620315	0.000175685	0.0728642	0.517725	0.684824	-0.167099	3	13572380	+	OpenSea
720	cg00730653	4.84e-05	0.0441667	0.0182978	0.0145514	0.00374649	3	13920053	+	Island	WNT7A			DMR
2644	cg04214801	0.000387021	0.0962488	0.846472	0.8804	-0.0339282	3	14468430	-	OpenSea	SLC6A6;SLC6A6;SLC6A6;SLC6A6
769	cg23259384	5.44e-05	0.0461814	0.921932	0.952983	-0.0310513	3	14545312	-	OpenSea	GRIP2
1729	cg15609410	0.000199287	0.0757925	0.821067	0.876106	-0.0550393	3	15328890	-	OpenSea	SH3BP5;SH3BP5				TRUE
2578	cg23479892	0.000371352	0.0946956	0.025116	0.0210433	0.00407264	3	15469033	+	Island	METTL6;EAF1;METTL6	high-CpG:15443985-15444060
2128	cg02129737	0.000281755	0.0869799	0.76687	0.815146	-0.0482752	3	17131888	+	OpenSea	PLCL2;PLCL2
920	cg16291750	7.18e-05	0.0512108	0.876457	0.898953	-0.0224962	3	18003561	+	OpenSea
2598	cg15887260	0.000375944	0.0951513	0.557745	0.655835	-0.0980899	3	23772718	-	OpenSea
1820	cg12306156	0.000217913	0.0785976	0.0262005	0.021795	0.00440559	3	24536327	+	Island	THRB;THRB;THRB	high-CpG:24511255-24511733			TRUE
2104	cg23571990	0.000276707	0.0864431	0.735126	0.782291	-0.047165	3	27307575	+	OpenSea	NEK10;NEK10
2232	cg24500226	0.000298831	0.0880095	0.0245521	0.0195085	0.00504366	3	27525991	+	Island	SLC4A7
351	cg07485279	1.55e-05	0.029071	0.0359039	0.0308838	0.00502016	3	31574058	-	Island	STT3B;STT3B	high-CpG:31548975-31549494
2321	cg15635052	0.000315252	0.0891098	0.033367	0.0273666	0.00600046	3	32433105	+	Island	CMTM7;CMTM7
2066	cg26280526	0.00026694	0.084962	0.0338487	0.027232	0.00661669	3	32543926	-	N_Shore	CMTM6
2652	cg06656092	0.000389859	0.0966664	0.552846	0.536597	0.0162485	3	33074571	-	OpenSea	GLB1;GLB1;GLB1
610	cg25354716	3.63e-05	0.0390881	0.707169	0.787408	-0.0802387	3	33159475	-	S_Shelf	CRTAP
786	cg07696485	5.52e-05	0.0461814	0.0394154	0.0289278	0.0104876	3	36986642	+	Island	TRANK1			DMR
956	cg09352908	7.55e-05	0.0519087	0.93049	0.952298	-0.0218083	3	37017749	-	OpenSea
1911	cg19132762	0.000233667	0.0803846	0.0197446	0.0161335	0.00361112	3	37034739	+	Island	EPM2AIP1;MLH1;MLH1;MLH1;MLH1;EPM2AIP1
1795	cg05878115	0.000213012	0.0779718	0.743266	0.796678	-0.0534115	3	38054983	+	OpenSea	PLCD1;PLCD1;PLCD1
1851	cg08278194	0.000221953	0.0787734	0.916517	0.944827	-0.0283097	3	39497860	+	OpenSea
352	cg21801428	1.57e-05	0.0292505	0.866171	0.894202	-0.0280314	3	42061633	+	OpenSea					TRUE
134	cg07090470	2.98e-06	0.0146037	0.765181	0.82815	-0.0629698	3	43437351	+	OpenSea	ANO10;ANO10;ANO10;ANO10;ANO10		chr3:43437259-43437259
1925	cg11632238	0.000237029	0.0809679	0.0873321	0.0689848	0.0183473	3	44040539	+	Island				DMR
169	cg19182075	4.64e-06	0.018043	0.160074	0.0979371	0.0621368	3	44552139	+	OpenSea	ZNF852
512	cg22502448	2.81e-05	0.0360111	0.788182	0.858453	-0.0702709	3	44622831	+	Island	ZNF167
1823	cg25160593	0.000218067	0.0785976	0.0325509	0.0258438	0.0067071	3	44666684	-	Island	ZNF197;ZNF197
676	cg04604638	4.34e-05	0.0421546	0.65723	0.744998	-0.0877676	3	44688991	+	N_Shore	ZNF197;ZNF35
2215	cg24173921	0.000296487	0.0879718	0.0238656	0.0185194	0.00534621	3	44690229	+	Island	ZNF35
991	cg19301602	7.98e-05	0.0527569	0.539734	0.661217	-0.121483	3	46855194	+	S_Shore
1330	cg21548772	0.000132268	0.0653746	0.0161781	0.0124056	0.00377254	3	47422338	-	Island	PTPN23
1121	cg16509829	9.84e-05	0.0576483	0.0381587	0.0298968	0.00826188	3	48130378	-	Island	MAP4;MAP4;MAP4;MAP4;MAP4;MAP4	high-CpG:48105287-48105766
1413	cg01140579	0.000146425	0.0681421	0.0358138	0.0297968	0.00601693	3	48541502	-	Island	SHISA5	high-CpG:48516497-48516670
1159	cg24569018	0.0001042	0.0590713	0.972482	0.977344	-0.00486232	3	48659211	-	OpenSea	TMEM89
882	cg22934568	6.71e-05	0.0499455	0.0218702	0.0180534	0.00381682	3	48884614	+	Island	PRKAR2A
930	cg26679668	7.25e-05	0.0512108	0.653844	0.731381	-0.0775377	3	49218951	-	OpenSea	C3orf84		chr3:49218772-49218772
2648	cg16872172	0.00038906	0.096614	0.0306482	0.0258733	0.00477484	3	49449542	+	Island	TCTA;RHOA	high-CpG:49424257-49424558
288	cg14918243	1.12e-05	0.0254933	0.833608	0.872463	-0.0388549	3	49504689	-	N_Shelf	DAG1
1117	cg17309592	9.75e-05	0.0573527	0.228188	0.152048	0.07614	3	49591741	+	Island	BSN
986	cg00291981	7.9e-05	0.0527003	0.0258011	0.0212642	0.0045369	3	49591748	+	Island	BSN
2073	cg16324015	0.000268926	0.0852935	0.776598	0.813453	-0.0368548	3	50245092	-	S_Shore	SLC38A3
1273	cg15247793	0.000122384	0.0632175	0.018855	0.0158805	0.00297458	3	50297552	-	Island					TRUE
2812	cg23581009	0.000422416	0.0987793	0.071611	0.0461742	0.0254368	3	50310506	+	Island	SEMA3B;SEMA3B;SEMA3B;SEMA3B;SEMA3B;SEMA3B;SEMA3B;MIR6872
2358	cg25486143	0.000320139	0.0892229	0.0156952	0.0133492	0.00234595	3	50378527	+	Island	RASSF1;RASSF1
900	cg26325335	6.97e-05	0.0509598	0.0322116	0.0155386	0.016673	3	50402333	+	Island	CACNA2D2;CACNA2D2				TRUE
2540	cg01044394	0.000359367	0.092996	0.0210842	0.0179555	0.00312864	3	51422497	+	Island	MANF	high-CpG:51397425-51397608
2301	cg18363564	0.000311772	0.0890967	0.651736	0.744009	-0.0922728	3	51861905	-	OpenSea	IQCF3;IQCF3
294	cg03949181	1.14e-05	0.0254933	0.0255674	0.0212841	0.00428333	3	52017281	-	Island	ACY1;ACY1;ACY1;ACY1;ACY1;ABHD14A-ACY1
202	cg02240671	6.17e-06	0.0200919	0.549672	0.609908	-0.0602359	3	52149713	+	OpenSea	POC1A;POC1A;POC1A
2162	cg11056739	0.000287198	0.0872939	0.0204635	0.0167863	0.00367719	3	52280059	+	Island	PPM1M;PPM1M				TRUE
2046	cg03869063	0.00026233	0.0843051	0.0238827	0.0205085	0.0033742	3	52312834	-	Island	WDR82
332	cg01856141	1.39e-05	0.0275386	0.0242699	0.0202037	0.00406622	3	52804944	+	Island	NEK4;NEK4	high-CpG:52779961-52780035
36	cg25531473	3.78e-07	0.00670651	0.862718	0.91001	-0.047292	3	52810463	-	OpenSea	ITIH1
1432	cg15787377	0.000148857	0.0683545	0.83658	0.884226	-0.0476459	3	52810468	-	OpenSea	ITIH1
6	cg13612365	5.26e-08	0.00411324	0.750045	0.822503	-0.0724586	3	53021495	-	OpenSea	SFMBT1
244	cg23660805	8.91e-06	0.0240099	0.048274	0.0357462	0.0125279	3	53195174	-	Island	PRKCD;PRKCD
1791	cg06035161	0.000212238	0.077906	0.0126794	0.0108728	0.0018066	3	53915801	-	Island	ACTR8
1564	cg07100595	0.000172105	0.0723485	0.904615	0.916934	-0.0123191	3	56503840	+	S_Shore	ERC2
759	cg10636163	5.38e-05	0.0461814	0.724954	0.786022	-0.0610682	3	59049804	-	OpenSea
2076	cg01395402	0.000269396	0.0852935	0.0271405	0.0225693	0.00457123	3	63898123	-	Island	ATXN7;ATXN7	high-CpG:63872767-63873392
1351	cg01999998	0.00013636	0.066337	0.812839	0.860517	-0.0476781	3	64599036	-	OpenSea	ADAMTS9;ADAMTS9
726	cg25112966	4.92e-05	0.0445411	0.729886	0.781015	-0.0511292	3	72792066	+	S_Shelf
1587	cg07757701	0.000176011	0.0728939	0.74264	0.771384	-0.028744	3	84822086	+	OpenSea	LINC00971
1593	cg23544545	0.000176866	0.073008	0.0237159	0.0203021	0.00341382	3	88199123	-	Island	C3orf38;C3orf38	high-CpG:88281732-88281854
532	cg05893674	3e-05	0.0370254	0.881458	0.91629	-0.0348313	3	96495966	-	Island
2481	cg21040807	0.000346475	0.0918305	0.0259386	0.0228652	0.00307343	3	98451371	+	Island	ST3GAL6;ST3GAL6;ST3GAL6;ST3GAL6;ST3GAL6;ST3GAL6;ST3GAL6;ST3GAL6;ST3GAL6;ST3GAL6;ST3GAL6-AS1	high-CpG:99933768-99934736		DMR
1650	cg25034288	0.000186857	0.0743365	0.7783	0.796506	-0.0182055	3	99834822	+	OpenSea	FILIP1L;FILIP1L;CMSS1;CMSS1
2067	cg14691964	0.000267446	0.0850817	0.900008	0.913262	-0.0132538	3	99897459	+	OpenSea	CMSS1;CMSS1
2727	cg04342737	0.000405809	0.0977584	0.0632358	0.0459793	0.0172565	3	99979591	+	N_Shore	TBC1D23
510	cg05496360	2.77e-05	0.0357685	0.805726	0.845967	-0.0402411	3	100920635	-	OpenSea
88	cg14930241	1.3e-06	0.00969642	0.567269	0.633595	-0.0663259	3	101334481	+	OpenSea
1601	cg02321062	0.000178746	0.0733726	0.0194233	0.017538	0.00188524	3	107244746	+	S_Shelf	BBX;BBX
1769	cg09643587	0.000208417	0.0774297	0.0304854	0.0277227	0.0027627	3	107809710	-	Island	CD47;CD47;CD47
188	cg10249489	5.67e-06	0.0197875	0.0293042	0.0223165	0.00698767	3	110790945	+	Island	PVRL3;PVRL3;PVRL3
1653	cg18114756	0.000187092	0.0743365	0.852604	0.87971	-0.0271061	3	114024972	-	OpenSea	TIGIT
1941	cg10960118	0.000240545	0.081382	0.805058	0.734204	0.0708535	3	115386082	+	OpenSea	GAP43;GAP43				TRUE
463	cg05008406	2.42e-05	0.0343625	0.0247575	0.0208462	0.00391132	3	118959563	+	Island	B4GALT4;B4GALT4
597	cg24446128	3.51e-05	0.0386063	0.448691	0.511036	-0.0623445	3	119656458	+	OpenSea	GSK3B;GSK3B
476	cg20569145	2.51e-05	0.0346822	0.933301	0.949096	-0.0157953	3	121253002	+	OpenSea	POLQ
1930	cg11384718	0.000238801	0.0813093	0.0360745	0.0293299	0.00674464	3	121553940	+	Island	IQCB1;IQCB1;EAF2	high-CpG:123036526-123036637
416	cg00197692	2.07e-05	0.032758	0.0140332	0.012253	0.00178028	3	122102920	-	Island	CCDC58;CCDC58;FAM162A
1698	cg03808840	0.000193319	0.0748296	0.714114	0.771476	-0.0573612	3	122201002	-	OpenSea	KPNA1;KPNA1
1401	cg03642425	0.000144797	0.0679465	0.0231566	0.0206065	0.00255003	3	122746419	-	Island	SEMA5B;SEMA5B	high-CpG:124228999-124229297
136	cg13308143	3.14e-06	0.0151685	0.926561	0.946596	-0.0200358	3	123813419	+	OpenSea	KALRN;KALRN;KALRN
737	cg15128638	5.11e-05	0.0456174	0.604296	0.685934	-0.0816379	3	124493484	+	OpenSea	ITGB5				TRUE
300	cg01684233	1.18e-05	0.0259185	0.452753	0.39436	0.0583937	3	125896282	+	N_Shelf	ALDH1L1
1765	cg11528839	0.000207517	0.0773124	0.0136911	0.0120258	0.00166534	3	126076361	+	Island	KLF15	high-CpG:127558747-127559226
1825	cg20997239	0.00021841	0.0785976	0.826603	0.852553	-0.0259504	3	126960539	-	OpenSea
2487	cg10739087	0.00034853	0.0921316	0.954255	0.96284	-0.0085846	3	128181482	+	OpenSea	DNAJB8
1749	cg24334648	0.000203176	0.0763877	0.09189	0.0607634	0.0311266	3	128202036	+	N_Shelf	GATA2;GATA2;GATA2				TRUE
1359	cg19497709	0.000137803	0.0666419	0.759855	0.674647	0.0852075	3	128994810	-	N_Shelf	COPG
2521	cg01060026	0.000354118	0.092367	0.0168476	0.0142691	0.00257859	3	129324501	-	Island	PLXND1			DMR	TRUE
2860	cg02724127	0.000433475	0.0996396	0.0712683	0.041246	0.0300222	3	129325706	+	S_Shore	PLXND1	high-CpG:130807524-130808774
2651	cg23330828	0.000389668	0.0966555	0.028151	0.0243611	0.00378991	3	129611968	+	Island	TMCC1;TMCC1
704	cg12816829	4.63e-05	0.0431954	0.770569	0.815619	-0.0450504	3	129703175	+	OpenSea
1203	cg25031371	0.000110648	0.060481	0.705876	0.791285	-0.085409	3	131263063	+	OpenSea	CPNE4;CPNE4;CPNE4
2309	cg24433685	0.000313262	0.0891098	0.302361	0.343597	-0.0412361	3	132151724	-	OpenSea	DNAJC13
2021	cg02738677	0.00025682	0.0835611	0.927857	0.947697	-0.0198393	3	133265129	+	OpenSea
2003	cg12331704	0.000252413	0.0828501	0.841543	0.880385	-0.0388413	3	133383640	+	S_Shelf
2582	cg22889573	0.000372082	0.0947596	0.0216567	0.0185152	0.00314144	3	134369939	+	Island	KY			DMR	TRUE
2036	cg18572609	0.000259937	0.0839391	0.834057	0.854589	-0.0205325	3	136150391	+	OpenSea	STAG1
1158	cg06194885	0.000104084	0.0590713	0.676996	0.74722	-0.0702246	3	138150379	-	N_Shelf
1771	cg09429345	0.000208935	0.0775773	0.0268901	0.0225959	0.00429412	3	138327826	+	Island	FAIM;FAIM;FAIM;FAIM				TRUE
1008	cg00076998	8.17e-05	0.0532936	0.0202204	0.0158381	0.00438224	3	138553170	-	Island
1689	cg01379240	0.000192065	0.074708	0.0190527	0.0162289	0.00282374	3	138666144	+	Island	C3orf72;FOXL2;C3orf72
938	cg14914739	7.37e-05	0.0514617	0.956035	0.971714	-0.0156796	3	141497321	+	Island	GRK7
450	cg16526479	2.33e-05	0.0340466	0.763199	0.819322	-0.0561228	3	141902352	-	OpenSea	GK5;GK5
467	cg07552157	2.47e-05	0.0346252	0.0247164	0.020035	0.00468138	3	142720316	-	Island	SR140
1818	cg08858437	0.000217317	0.078568	0.0189962	0.0163893	0.00260689	3	142838938	+	Island	CHST2;CHST2			DMR
1647	cg13065169	0.000186088	0.0742962	0.02617	0.0192482	0.00692176	3	145878979	-	Island	PLOD2;PLOD2;PLOD2;PLOD2	high-CpG:147361489-147361913
913	cg01612290	7.1e-05	0.0511286	0.0691538	0.0458284	0.0233254	3	148709334	+	Island	GYG1;GYG1;GYG1;GYG1;GYG1;GYG1	high-CpG:150191830-150192070
127	cg11981600	2.73e-06	0.0139844	0.699984	0.610257	0.0897262	3	148726579	-	OpenSea	GYG1;GYG1;GYG1
28	cg24196351	2.79e-07	0.00655192	0.931695	0.956989	-0.0252944	3	149182962	+	OpenSea
1240	cg24255728	0.00011618	0.0616101	0.0196307	0.0162219	0.00340876	3	150804063	+	Island	MED12L			DMR
816	cg20795139	5.92e-05	0.0476841	0.0439196	0.0320939	0.0118257	3	153839142	-	Island	SGEF	high-CpG:155321826-155322309
1521	cg09452751	0.00016392	0.0708668	0.0249815	0.0222097	0.00277181	3	155572485	-	Island	SLC33A1
2846	cg15061302	0.000429863	0.0992983	0.0158996	0.0132871	0.00261255	3	156392435	-	Island	TIPARP-AS1;TIPARP;TIPARP;TIPARP	high-CpG:157875069-157875129
389	cg12811797	1.87e-05	0.0316122	0.0425438	0.0273637	0.0151801	3	156392549	+	Island	TIPARP-AS1;TIPARP;TIPARP;TIPARP
2723	cg07255810	0.000404582	0.0977012	0.914516	0.925377	-0.0108606	3	158161558	-	OpenSea	RSRC1;RSRC1;RSRC1
1645	cg23851169	0.000185689	0.0742268	0.0146711	0.0116986	0.00297256	3	159943318	-	Island	C3orf80	high-CpG:161425902-161426018
2469	cg04479354	0.000344534	0.0916811	0.0234759	0.0197474	0.00372851	3	160118184	-	Island	SMC4;SMC4;IFT80
1954	cg05147070	0.000242391	0.0815706	0.0439366	0.0355603	0.00837629	3	160283469	-	Island	KPNA4	high-CpG:161766163-161766326
238	cg02373061	8.41e-06	0.0232404	0.685179	0.749758	-0.0645796	3	163021252	+	OpenSea	LINC01192
530	cg21937593	2.97e-05	0.0368003	0.0361424	0.0294467	0.00669573	3	167098088	+	Island	ZBBX
1022	cg15578615	8.38e-05	0.0539045	0.0309779	0.0268957	0.0040822	3	170074599	-	N_Shore	SKIL;SKIL
2830	cg10089796	0.000426037	0.0989762	0.0310693	0.0245042	0.00656506	3	170076067	-	Island	SKIL;SKIL;SKIL
230	cg15237829	7.77e-06	0.022206	0.65753	0.543577	0.113952	3	171102373	+	OpenSea	TNIK;TNIK;TNIK;TNIK;TNIK;TNIK;TNIK;TNIK;TNIK				TRUE
397	cg18724032	1.94e-05	0.0319076	0.0509088	0.0369487	0.0139601	3	171758176	+	Island	FNDC3B;FNDC3B	high-CpG:173240802-173241069
2086	cg13522051	0.000273255	0.0861381	0.613632	0.647886	-0.0342542	3	172033145	+	OpenSea	FNDC3B;FNDC3B
2803	cg05294250	0.000419793	0.0984813	0.013159	0.0113122	0.00184681	3	172468745	+	Island		high-CpG:173951163-173951507
2372	cg09711970	0.000322111	0.089296	0.0280358	0.02476	0.00327585	3	179065677	-	Island	MFN1	high-CpG:180548204-180548392
2734	cg12872693	0.00040751	0.0980124	0.0287912	0.0226231	0.0061681	3	179168798	-	Island	GNB4
1713	cg01816191	0.000196288	0.075349	0.760168	0.676004	0.084164	3	180629523	+	N_Shore	FXR1;FXR1;FXR1
1303	cg01457183	0.000126058	0.0636162	0.053895	0.0441313	0.00976377	3	180707371	-	Island	DNAJC19
776	cg17323383	5.48e-05	0.0461814	0.0240638	0.0201198	0.00394406	3	182896670	+	N_Shore	MCF2L2
1754	cg19100138	0.000204673	0.0766919	0.0336015	0.0286644	0.00493711	3	183993995	-	Island	ECE2;ECE2;ECE2;ECE2			DMR	TRUE
1868	cg16657164	0.00022417	0.0788901	0.0221953	0.0194589	0.00273632	3	184243411	+	S_Shore				DMR	TRUE
1053	cg09645126	8.9e-05	0.0555777	0.0248547	0.0191058	0.00574888	3	184870685	-	Island	C3orf70;C3orf70	high-CpG:186353321-186353563
2184	cg04442328	0.000291389	0.0876793	0.0718947	0.0512226	0.0206722	3	185304136	-	Island	SENP2;SENP2	high-CpG:186786688-186786840
2545	cg13483916	0.000362027	0.0935338	0.0287848	0.0254512	0.00333359	3	187456579	-	Island	BCL6
1565	cg12126519	0.000172188	0.0723485	0.544901	0.604384	-0.0594835	3	188447502	-	OpenSea	LPP;LPP;LPP
2237	cg05935283	0.000299948	0.08817	0.0115005	0.00972445	0.00177601	3	190231667	-	Island	IL1RAP;IL1RAP;IL1RAP;IL1RAP;IL1RAP;IL1RAP
2456	cg18149689	0.00034079	0.0912079	0.0145798	0.0121998	0.00237996	3	193721164	+	Island					TRUE
1983	cg18735798	0.00024826	0.0822409	0.027307	0.0229618	0.00434521	3	194392871	+	Island	LSG1
1615	cg08493265	0.000180314	0.0734173	0.922202	0.942155	-0.019953	3	195539297	+	OpenSea	MUC4;MUC4;MUC4
2429	cg17913255	0.000335839	0.090917	0.914409	0.938102	-0.0236934	3	195595244	-	Island	TNK2;TNK2
1356	cg16053281	0.000137292	0.0665774	0.968241	0.972578	-0.00433667	3	196387058	-	Island	LRRC33
91	cg02319016	1.34e-06	0.00970241	0.788215	0.877647	-0.0894323	3	196469777	+	S_Shelf	PAK2
567	cg11631334	3.28e-05	0.0379868	0.0620432	0.0365583	0.0254849	3	196730272	-	Island	MFI2	high-CpG:198214173-198214993			TRUE
2498	cg03784611	0.000350185	0.0921536	0.953715	0.968744	-0.0150292	3	196754501	-	N_Shore	MFI2;MFI2
133	cg23587044	2.9e-06	0.0143382	0.406283	0.498876	-0.0925933	3	196777478	+	OpenSea	DLG1;DLG1;DLG1;DLG1;DLG1;DLG1
922	cg16598007	7.18e-05	0.0512108	0.0478556	0.036092	0.0117636	3	197025014	+	Island	DLG1;DLG1;DLG1;DLG1;DLG1-AS1	high-CpG:198509157-198509934
2743	cg05721281	0.000410032	0.0981299	0.0505932	0.0455942	0.00499899	3	197477555	+	Island	FYTTD1;FYTTD1;FYTTD1;KIAA0226	high-CpG:198961782-198961966
2549	cg17641861	0.000363164	0.093618	0.0398364	0.030203	0.00963335	4	570361	+	Island
1334	cg12094170	0.000132775	0.0654454	0.0538511	0.0451836	0.00866747	4	668131	-	Island	ATP5I;ATP5I
2769	cg09595537	0.000414987	0.0983804	0.01841	0.0146662	0.00374378	4	668144	-	Island	ATP5I
2580	cg23986975	0.000371651	0.0947233	0.0624017	0.0528995	0.00950226	4	699288	+	N_Shore	PCGF3
2526	cg06595176	0.000355319	0.0924763	0.927029	0.94938	-0.0223518	4	943562	+	S_Shelf	TMEM175
970	cg02552079	7.77e-05	0.0526705	0.835348	0.780681	0.0546669	4	1220951	-	N_Shore	CTBP1;CTBP1
2621	cg10903826	0.000380178	0.0953639	0.0269448	0.0234396	0.00350522	4	1242276	+	Island	CTBP1;CTBP1	high-CpG:1232107-1234012
932	cg14864292	7.26e-05	0.0512108	0.0157584	0.0138471	0.00191131	4	1340084	+	N_Shore	KIAA1530		chr4:1339592-1339592
2261	cg14029580	0.000304514	0.088359	0.852447	0.892465	-0.0400181	4	1363708	+	N_Shore	KIAA1530
1518	cg07306659	0.000163091	0.070648	0.0096723	0.00881833	0.000853973	4	1713762	-	Island	SLBP;SLBP;SLBP
2338	cg14241672	0.000317123	0.0891098	0.0161412	0.0129372	0.00320399	4	1714399	-	Island	SLBP	high-CpG:1683881-1684435
1598	cg06545742	0.000178017	0.0732532	0.0172346	0.0151101	0.00212449	4	1723058	-	Island	TMEM129;TACC3;TMEM129;TMEM129;TMEM129	high-CpG:1692574-1692883
1218	cg18548362	0.000113123	0.0609618	0.0378703	0.02924	0.00863028	4	1857197	+	Island	LETM1
2503	cg21380375	0.000350993	0.0922083	0.817667	0.836065	-0.0183979	4	2097857	+	OpenSea	POLN
415	cg17370785	2.07e-05	0.032758	0.747365	0.827734	-0.0803687	4	2252266	-	OpenSea	MXD4
2168	cg04589118	0.000288444	0.0874195	0.69349	0.745525	-0.0520355	4	2848840	-	S_Shelf	ADD1;ADD1;ADD1;ADD1
606	cg24084459	3.59e-05	0.0389224	0.920153	0.93352	-0.0133667	4	2928179	-	Island	ADD1;ADD1;ADD1;ADD1
2741	cg09693228	0.000409244	0.0981299	0.031775	0.0252412	0.00653381	4	2965311	-	Island	GRK4;GRK4;GRK4;NOP14	high-CpG:2935065-2935196
883	cg00559635	6.71e-05	0.0499455	0.960982	0.968379	-0.0073976	4	3415930	+	S_Shore	RGS12;RGS12;RGS12
2824	cg04930921	0.000425363	0.0989762	0.851301	0.902816	-0.0515154	4	3447796	+	N_Shore	HGFAC
2473	cg00800634	0.000345188	0.0917511	0.0346812	0.0292256	0.00545558	4	3882420	+	OpenSea
1124	cg00650856	9.87e-05	0.0576483	0.025159	0.0224347	0.00272436	4	4389720	-	Island	D4S234E;D4S234E			DMR
1199	cg05732832	0.000110226	0.0604258	0.0317177	0.026509	0.00520868	4	4868723	-	Island				DMR
2260	cg22290744	0.000304444	0.088359	0.0168096	0.0141784	0.0026312	4	5710016	-	Island	EVC2;EVC2			DMR
2001	cg26128456	0.000252136	0.0828501	0.848745	0.816912	0.0318331	4	6055575	-	OpenSea	JAKMIP1;JAKMIP1
1945	cg06007323	0.000240934	0.081382	0.053001	0.0443778	0.0086232	4	6784769	-	Island	KIAA0232;KIAA0232
1544	cg19223129	0.000167706	0.0714025	0.939839	0.951975	-0.0121354	4	7052403	-	Island	TADA2B
1196	cg00733838	0.000109938	0.0604203	0.949752	0.959591	-0.009839	4	7473297	+	OpenSea	SORCS2
572	cg17823807	3.32e-05	0.0381564	0.869947	0.907974	-0.0380271	4	8121992	+	OpenSea	ABLIM2;ABLIM2;ABLIM2;ABLIM2;ABLIM2;ABLIM2;ABLIM2
2588	cg01116460	0.000373688	0.0949378	0.765802	0.807029	-0.0412279	4	15879824	-	OpenSea
1764	cg11026330	0.000207417	0.0773124	0.0340012	0.0277842	0.006217	4	18023101	+	Island	LCORL;LCORL
963	cg10274108	7.67e-05	0.0523528	0.825039	0.868453	-0.0434147	4	38082931	-	OpenSea	TBC1D1
1763	cg14094333	0.000207043	0.0772234	0.144483	0.0941575	0.0503257	4	38666051	-	Island	KLF3;KLF3;FLJ13197
2657	cg13888710	0.000390761	0.0967078	0.0627797	0.0455255	0.0172542	4	39699558	-	Island	UBE2K;UBE2K;UBE2K
2491	cg07282076	0.000349303	0.0921536	0.789088	0.835235	-0.0461461	4	40380864	-	OpenSea
1167	cg23681495	0.00010542	0.0591738	0.785412	0.815949	-0.0305363	4	40982188	+	OpenSea	APBB2;APBB2;APBB2
1096	cg26987697	9.5e-05	0.056989	0.103572	0.068191	0.0353808	4	47916498	-	Island	NFXL1	high-CpG:47611255-47611449
408	cg03384609	1.98e-05	0.0319234	0.531504	0.624459	-0.092955	4	48863897	+	OpenSea
1063	cg27183602	9.02e-05	0.0557857	0.0181217	0.0145098	0.00361195	4	52709200	-	Island	DCUN1D4;DCUN1D4
2626	cg25019777	0.000382475	0.0957744	0.121679	0.0683177	0.0533612	4	53525403	-	Island	USP46;USP46	high-CpG:53220158-53220329
2789	cg18378453	0.000417679	0.0984771	0.0363776	0.0266927	0.00968485	4	53617443	-	Island				DMR	TRUE
667	cg07906239	4.22e-05	0.0414401	0.748752	0.79309	-0.0443376	4	54549172	+	OpenSea
981	cg18471927	7.87e-05	0.0526705	0.0126395	0.0103152	0.0023243	4	54966805	-	Island	GSX2			DMR	TRUE
417	cg08101859	2.08e-05	0.032778	0.82593	0.875307	-0.0493772	4	56280173	-	OpenSea	TMEM165;TMEM165
178	cg13086586	5.14e-06	0.0190051	0.210544	0.150237	0.0603064	4	57303149	+	S_Shore	PAICS;PAICS;PAICS;PPAT
206	cg02193513	6.41e-06	0.0204751	0.661364	0.73774	-0.0763768	4	57395012	+	N_Shore
1957	cg16210014	0.000243284	0.0817114	0.900223	0.912942	-0.0127198	4	57459439	-	S_Shore	THEGL
2392	cg01197891	0.000326574	0.0897763	0.017545	0.0146714	0.00287359	4	57843787	-	Island	C4orf14;POLR2B;C4orf14	high-CpG:57538463-57538551
1454	cg24087678	0.000153803	0.0695571	0.598273	0.625683	-0.0274099	4	68830059	-	OpenSea	TMPRSS11A;TMPRSS11A
167	cg12486486	4.58e-06	0.0179581	0.7138	0.769825	-0.0560252	4	69179905	+	OpenSea	YTHDC1;YTHDC1
797	cg10368518	5.68e-05	0.0468331	0.0232187	0.0191103	0.00410836	4	71859343	-	Island	DCK;DCK	high-CpG:72078107-72078352
2479	cg02029926	0.00034606	0.0917945	0.0547127	0.0439599	0.0107528	4	74734874	+	N_Shore	CXCL1
1417	cg03191889	0.00014726	0.0681494	0.0479132	0.0403283	0.0075849	4	75858262	-	N_Shore	PARM1	high-CpG:76077229-76077666
978	cg15540044	7.86e-05	0.0526705	0.0166746	0.0148201	0.00185448	4	76439595	+	Island	RCHY1;THAP6;RCHY1;RCHY1;RCHY1;RCHY1;RCHY1	high-CpG:76658503-76658671
584	cg03757145	3.42e-05	0.0383038	0.0348792	0.0248058	0.0100735	4	76555832	+	Island	CDKL2				TRUE
1431	cg27624381	0.000148817	0.0683545	0.709555	0.636654	0.0729014	4	77917883	+	OpenSea	2020-09-11				TRUE
1781	cg16506959	0.000210526	0.0776768	0.742493	0.779946	-0.0374531	4	83404135	+	OpenSea
2671	cg25071831	0.000393304	0.0967949	0.776544	0.847513	-0.0709686	4	83878621	-	OpenSea	LIN54;LIN54;LIN54;LIN54;LIN54;LIN54;LIN54
2636	cg23704733	0.000384968	0.0960331	0.00965616	0.00858471	0.00107144	4	84031142	-	Island	PLAC8;PLAC8;PLAC8
747	cg24644049	5.2e-05	0.0457585	0.0444833	0.0327412	0.0117421	4	85504048	-	Island	CDS1
464	cg04355093	2.44e-05	0.0346218	0.073789	0.0470249	0.0267641	4	85887382	-	Island	WDFY3;C4orf12;WDFY3
1955	cg03886687	0.000242632	0.0816098	0.539258	0.440922	0.0983352	4	87281409	+	OpenSea	MAPK10;MAPK10;MAPK10
1223	cg03388189	0.000113498	0.061005	0.839324	0.872739	-0.0334152	4	87468672	+	OpenSea
1842	cg01243968	0.000220721	0.078768	0.045966	0.0350003	0.0109657	4	87515433	-	Island	PTPN13;PTPN13;PTPN13;PTPN13
109	cg12588470	2.23e-06	0.0134467	0.0500842	0.0282572	0.021827	4	89444909	+	Island	PIGY;PIGY;PIGY;PIGY	high-CpG:89663870-89663997
2686	cg20079523	0.000395585	0.0968446	0.792947	0.832794	-0.0398469	4	89929546	+	OpenSea	FAM13A
2249	cg14689953	0.000302809	0.088359	0.0395259	0.0329013	0.00662456	4	91048823	+	Island	FAM190A;FAM190A
790	cg14021572	5.55e-05	0.0461814	0.0657186	0.0479796	0.017739	4	105416420	+	Island
2623	cg13121061	0.000380435	0.0953725	0.903906	0.910102	-0.00619634	4	105828553	-	OpenSea
2285	cg08406981	0.000307657	0.0885005	0.711897	0.782268	-0.0703702	4	106729860	-	OpenSea	GSTCD;GSTCD				TRUE
2027	cg20025135	0.000258302	0.083755	0.848729	0.880674	-0.0319454	4	107446698	-	OpenSea
2006	cg23200970	0.000252856	0.0828864	0.0237673	0.0193825	0.0043848	4	111119917	-	Island	ELOVL6;ELOVL6
2156	cg14611892	0.000286597	0.0872939	0.0225865	0.0183679	0.00421867	4	113067071	-	Island	C4orf32
1609	cg24071582	0.000179686	0.0734098	0.025964	0.0233548	0.00260918	4	113430656	-	N_Shore				DMR	TRUE
547	cg24110229	3.15e-05	0.0378323	0.573604	0.412404	0.161199	4	125624536	+	OpenSea	ANKRD50;ANKRD50
973	cg14139551	7.8e-05	0.0526705	0.882788	0.920167	-0.0373794	4	126202309	+	OpenSea
2620	cg13077762	0.000380077	0.0953639	0.0212944	0.0175179	0.00377651	4	128982454	+	Island	LARP1B;LARP1B;LARP1B	high-CpG:129201854-129202143
2002	cg15831663	0.000252334	0.0828501	0.767781	0.800576	-0.0327953	4	131729521	-	OpenSea
269	cg14561596	1.03e-05	0.025161	0.928941	0.941233	-0.0122921	4	133045178	+	OpenSea
1301	cg17720390	0.000125906	0.0635983	0.866746	0.893864	-0.0271176	4	140100698	+	S_Shore
517	cg05402288	2.84e-05	0.0360956	0.734039	0.790189	-0.0561504	4	140152404	-	OpenSea
2161	cg16675230	0.000287155	0.0872939	0.0468381	0.0310869	0.0157512	4	140477536	+	Island	SETD7;SETD7;SETD7;SETD7;SETD7;SETD7;SETD7
1557	cg03135535	0.000170708	0.0720841	0.961002	0.970749	-0.0097474	4	141564017	+	OpenSea	TBC1D9
1675	cg27080206	0.000190524	0.074708	0.907156	0.921233	-0.0140774	4	141624601	+	OpenSea	TBC1D9
245	cg25540078	8.98e-06	0.0240099	0.654637	0.69953	-0.0448926	4	144102007	-	N_Shelf
2604	cg14459319	0.000377074	0.0951883	0.450931	0.517919	-0.0669882	4	144206376	-	OpenSea
2520	cg24244452	0.000353585	0.0922645	0.778325	0.795126	-0.0168012	4	144284260	-	OpenSea	GAB1;GAB1
1246	cg15042811	0.000117594	0.0620594	0.0349019	0.0239205	0.0109813	4	144621971	-	Island	FREM3
2081	cg11271346	0.000271676	0.0858462	0.923324	0.933246	-0.00992196	4	146267367	-	OpenSea
14	cg00399861	1.08e-07	0.0048394	0.648935	0.787105	-0.138169	4	146879597	-	OpenSea
2398	cg19214222	0.000329543	0.0903658	0.0217765	0.0192394	0.00253711	4	147867081	-	Island	TTC29				TRUE
1929	cg09777578	0.000238539	0.0813093	0.0102693	0.00927768	0.000991591	4	148653439	+	Island	ARHGAP10
2861	cg01389445	0.000433642	0.0996396	0.0301148	0.0260901	0.00402474	4	155665106	+	Island	LRAT	high-CpG:155884550-155884603		DMR
1119	cg16700392	9.82e-05	0.0576483	0.129814	0.0802483	0.0495661	4	156680207	+	Island	GUCY1B3;GUCY1B3	high-CpG:156899590-156900053		DMR
297	ch.4.161272230R	1.17e-05	0.0258794	0.0316577	0.03776	-0.00610229	4	161052780	+	OpenSea
2461	cg16004439	0.000342923	0.0916277	0.776224	0.811672	-0.0354484	4	165851186	-	OpenSea
697	cg12303736	4.56e-05	0.0430072	0.947668	0.95953	-0.011862	4	165953306	-	OpenSea	TRIM60
1249	cg25399000	0.00011822	0.0622402	0.0288265	0.025043	0.00378352	4	166248820	+	Island	SC4MOL;SC4MOL;SC4MOL;SC4MOL	high-CpG:166468266-166468502
210	cg24627737	6.82e-06	0.0213659	0.754047	0.806219	-0.0521722	4	166272578	-	OpenSea
2306	cg18900772	0.000312848	0.0891098	0.891894	0.903296	-0.0114024	4	166703048	+	OpenSea
2672	cg17218137	0.000393322	0.0967949	0.0257082	0.0211069	0.00460125	4	169752830	-	N_Shore	PALLD;PALLD;PALLD;PALLD
1139	cg24887416	0.000100587	0.0580578	0.0180069	0.0150519	0.00295495	4	169753210	-	Island	PALLD;PALLD;PALLD;PALLD;PALLD	high-CpG:169989680-169989825
1975	cg15945785	0.000246263	0.0819924	0.970339	0.975749	-0.00541005	4	170304303	+	OpenSea
2791	cg20761678	0.000418108	0.0984813	0.0209362	0.0179374	0.00299877	4	170541503	-	Island	CLCN3;CLCN3;CLCN3
1087	cg03372076	9.36e-05	0.0566048	0.941702	0.949612	-0.00791056	4	171964403	-	OpenSea
2504	cg13513349	0.000351126	0.0922083	0.878523	0.888921	-0.0103975	4	175851061	+	OpenSea	ADAM29;ADAM29;ADAM29;ADAM29
2219	cg23256401	0.000297182	0.087994	0.654342	0.7036	-0.0492573	4	180203472	+	OpenSea					TRUE
1999	cg21042627	0.000251834	0.0828405	0.934233	0.950174	-0.0159404	4	183193100	+	OpenSea					TRUE
738	cg09767602	5.12e-05	0.0456174	0.0169007	0.0133443	0.00355643	4	183370138	+	Island	ODZ3	high-CpG:183607121-183607354		DMR
11	cg06262352	7.45e-08	0.00411324	0.867976	0.901808	-0.0338317	4	183418483	+	OpenSea	TENM3		chr4:183418367-183418367
2371	cg19423735	0.000322092	0.089296	0.0196191	0.0087371	0.010882	4	184366198	+	Island	CDKN2AIP
931	cg15444153	7.25e-05	0.0512108	0.0535552	0.0361497	0.0174055	4	184366221	+	Island	CDKN2AIP
632	cg20852378	3.86e-05	0.0401262	0.632428	0.696203	-0.0637758	4	184680264	-	S_Shore
1783	cg20989553	0.000210621	0.0776768	0.0277288	0.0240661	0.00366265	4	185458775	-	OpenSea				RDMR
1809	cg03354744	0.000215748	0.0783541	0.0204971	0.0179811	0.00251598	4	185655229	+	Island	MLF1IP;MLF1IP	high-CpG:185892211-185892286
570	cg08395298	3.31e-05	0.0381564	0.52346	0.571618	-0.0481587	4	185827243	-	OpenSea
110	cg03933991	2.28e-06	0.013573	0.0953101	0.0618809	0.0334293	4	186125346	-	Island	CFAP97;CFAP97
2235	cg06286962	0.000299269	0.0880493	0.0189578	0.0146935	0.00426425	4	187645685	+	Island	FAT1
633	cg08199544	3.87e-05	0.0402316	0.921756	0.946482	-0.0247262	5	140418	-	OpenSea	PLEKHG4B;PLEKHG4B
2437	cg24883374	0.000337365	0.0910303	0.967847	0.97393	-0.00608264	5	195171	+	Island	LRRC14B
509	cg13707777	2.77e-05	0.0357628	0.810794	0.86634	-0.0555452	5	308627	+	N_Shore	AHRR;PDCD6
1324	cg06999799	0.000131231	0.0651355	0.94962	0.960377	-0.0107567	5	1177305	+	OpenSea
647	cg11842953	4e-05	0.0405989	0.947187	0.960011	-0.0128237	5	1218561	-	Island	SLC6A19
364	cg10896616	1.63e-05	0.0293849	0.0428532	0.0306895	0.0121636	5	1295267	-	Island	TERT;TERT
131	cg11270834	2.85e-06	0.0142317	0.880778	0.923438	-0.0426593	5	1463488	-	Island	LPCAT1
64	cg08878447	7.35e-07	0.00752611	0.962443	0.97393	-0.0114869	5	1769471	-	Island
1748	cg01314143	0.000202432	0.0761515	0.0223936	0.0187337	0.00365989	5	1799486	+	Island	MRPL36
1021	cg25378916	8.37e-05	0.0538959	0.17746	0.192139	-0.0146789	5	1875013	-	Island				DMR	TRUE
382	cg26894484	1.77e-05	0.0303985	0.953004	0.961541	-0.0085366	5	1912101	-	OpenSea
645	cg21093166	3.99e-05	0.0405989	0.0586375	0.0409353	0.0177021	5	2752145	+	Island	IRX2;IRX2;C5orf38
2259	cg25714432	0.000304434	0.088359	0.811431	0.831699	-0.0202674	5	2887968	+	OpenSea
1333	cg15713280	0.000132525	0.0653746	0.938408	0.950175	-0.0117675	5	4866446	+	Island
253	cg07127534	9.62e-06	0.024908	0.952343	0.96122	-0.00887696	5	9119105	+	OpenSea	SEMA5A
1146	cg23516981	0.000101835	0.0584261	0.866535	0.88331	-0.0167751	5	14356625	+	OpenSea	TRIO
72	cg09546895	9.17e-07	0.00837817	0.0442622	0.0243043	0.0199579	5	32174322	-	Island	GOLPH3;GOLPH3	high-CpG:32209608-32210588
1267	cg24164873	0.000121604	0.0631122	0.0323863	0.0276104	0.00477597	5	32711151	-	Island	NPR3			DMR	TRUE
411	cg23430771	2.04e-05	0.0326539	0.890669	0.910822	-0.0201531	5	33984781	-	OpenSea	SLC45A2;SLC45A2
2110	cg27130364	0.000277601	0.0865127	0.0373941	0.0262348	0.0111593	5	36151796	+	Island	LMBRD2;SKP2;SKP2;LMBRD2
1982	cg08345179	0.00024806	0.0822409	0.0116091	0.00971525	0.00189388	5	37249405	-	Island	C5orf42;C5orf42	high-CpG:37285160-37285259
155	cg09597829	4.26e-06	0.0175502	0.759577	0.806181	-0.0466047	5	37575993	+	OpenSea	WDR70
1606	cg25017985	0.000179543	0.0734098	0.614888	0.523901	0.0909872	5	40406395	+	OpenSea			chr5:40406129-40406129
2125	cg22327282	0.000281257	0.0869799	0.0264588	0.0211537	0.00530507	5	40798309	-	Island	PRKAA1;PRKAA1	high-CpG:40833788-40834286
177	cg00675940	5.13e-06	0.0190051	0.649313	0.738259	-0.0889468	5	42923550	+	N_Shore
2	cg12578536	7.39e-09	0.0024284	0.650819	0.777133	-0.126314	5	43003251	+	S_Shelf
2158	cg20085065	0.000286719	0.0872939	0.605128	0.649995	-0.0448667	5	43084721	+	OpenSea	LOC100506639
285	cg17383793	1.09e-05	0.025161	0.0720424	0.0453437	0.0266987	5	52405638	+	Island	MOCS2;MOCS2	high-CpG:52441306-52441401
860	cg08921588	6.53e-05	0.0499208	0.950763	0.961458	-0.0106947	5	53945154	+	OpenSea
2629	cg25626508	0.000383759	0.0959846	0.0179301	0.0153322	0.00259789	5	54469057	-	Island	CDC20B;MIR449C;CDC20B;CDC20B				TRUE
1075	cg01639496	9.2e-05	0.0562157	0.0310852	0.0285325	0.00255267	5	54523091	-	Island	MCIDAS;MCIDAS
2039	cg12310673	0.000260326	0.0839391	0.0112377	0.0091865	0.00205117	5	54529452	-	Island	CCNO;CCNO
568	cg07589143	3.29e-05	0.0380587	0.0316109	0.026667	0.00494395	5	54603461	+	Island	DHX29;SKIV2L2;DHX29	high-CpG:54639195-54639330
200	cg19744051	6.12e-06	0.0200604	0.579485	0.670674	-0.0911892	5	55294284	-	S_Shelf
158	cg06320606	4.3e-06	0.0175502	0.0297953	0.0226497	0.00714554	5	60139941	+	Island	ELOVL7;ELOVL7
123	cg26789319	2.64e-06	0.0139844	0.875187	0.909555	-0.0343682	5	60995472	-	OpenSea	FLJ37543
2661	cg10380506	0.000391568	0.0967617	0.027675	0.021547	0.00612802	5	61602054	+	Island	KIF2A;KIF2A;KIF2A;KIF2A;KIF2A;KIF2A;KIF2A;KIF2A	high-CpG:61637701-61638182
1044	cg14123879	8.71e-05	0.0548202	0.0375356	0.0311858	0.00634984	5	61602127	+	Island	KIF2A;KIF2A;KIF2A;KIF2A	high-CpG:61637701-61638182
1409	cg13445128	0.000145746	0.0680186	0.863392	0.875701	-0.0123093	5	61856336	-	OpenSea	IPO11;IPO11
275	cg05902997	1.05e-05	0.025161	0.0209258	0.017521	0.00340476	5	65440515	-	Island	SFRS12;SFRS12
1805	cg09432409	0.000215092	0.0783541	0.734452	0.774023	-0.0395711	5	66540037	+	OpenSea
258	cg03256616	9.79e-06	0.024908	0.787443	0.840884	-0.0534418	5	68658355	-	OpenSea	AK6;AK6
2477	cg18054654	0.000345751	0.0917635	0.782998	0.822691	-0.0396929	5	70246896	-	OpenSea	SMN2;SMN1;SMN2;SMN2;SMN2;SMN1
2767	cg12849046	0.000414031	0.0983804	0.788637	0.812206	-0.023569	5	72063769	+	OpenSea
2004	cg17136794	0.000252493	0.0828501	0.715815	0.756195	-0.0403797	5	72131603	-	OpenSea	TNPO1
144	cg25916527	3.62e-06	0.0164201	0.879079	0.920656	-0.0415769	5	72292534	+	OpenSea	FCHO2;FCHO2
1270	cg08971592	0.000122173	0.0632175	0.627104	0.668347	-0.0412432	5	74904484	+	N_Shelf
1904	cg19245259	0.000231593	0.0799835	0.0369293	0.0297245	0.00720486	5	76788057	+	Island	WDR41;WDR41	high-CpG:76823773-76824146
996	cg08572394	7.99e-05	0.0527569	0.0387009	0.0368393	0.00186159	5	76932996	+	Island	OTP
2240	cg21742728	0.000301542	0.088359	0.825005	0.853189	-0.0281843	5	77286055	+	OpenSea
2631	cg05019671	0.000384067	0.0959904	0.0424552	0.0363259	0.00612925	5	77943786	+	N_Shore	LHFPL2
1498	cg06774087	0.000159857	0.0701717	0.888679	0.90263	-0.0139515	5	79647614	-	OpenSea	LOC441089
252	cg08071689	9.55e-06	0.024908	0.888713	0.907694	-0.018981	5	87517073	-	OpenSea	TMEM161B;TMEM161B;TMEM161B;TMEM161B
2506	cg26430167	0.000351453	0.0922206	0.0954951	0.0732047	0.0222904	5	87984943	+	N_Shore
1335	cg02611097	0.000132868	0.0654454	0.0181771	0.0162755	0.00190161	5	88179196	+	N_Shore	MEF2C;MEF2C;MEF2C;MEF2C;MEF2C;MEF2C;MEF2C-AS1
804	cg03603918	5.78e-05	0.0472721	0.687501	0.715254	-0.0277531	5	96293389	+	OpenSea	LNPEP;LNPEP
2032	cg13505794	0.000259013	0.0837817	0.0304325	0.0293398	0.00109269	5	110075158	-	Island	SLC25A46
336	cg05797914	1.43e-05	0.0279674	0.465159	0.528392	-0.0632327	5	110702850	-	OpenSea	CAMK4
1450	cg14447564	0.000152165	0.0690063	0.0151885	0.0127519	0.0024366	5	110848247	-	Island	STARD4;STARD4;STARD4;STARD4;STARD4;STARD4;STARD4;STARD4;STARD4;STARD4;STARD4;STARD4;STARD4;STARD4;STARD4;STARD4;STARD4;STARD4-AS1	high-CpG:110876059-110876200
1857	cg09835486	0.000222514	0.0787757	0.0356083	0.0255358	0.0100725	5	112257968	-	Island	REEP5;REEP5	high-CpG:112285796-112285997
1656	cg09681877	0.000187207	0.0743365	0.0405075	0.0278935	0.0126139	5	113391671	+	Island				DMR
875	cg11022944	6.66e-05	0.0499455	0.226346	0.168573	0.0577739	5	114598438	-	Island	PGGT1B
365	cg08941873	1.64e-05	0.0293849	0.550532	0.645889	-0.0953568	5	118308850	-	N_Shore	DTWD2
2192	cg01395111	0.000293679	0.087922	0.0740982	0.0711433	0.00295493	5	122371727	-	Island	PPIC
2451	cg02384682	0.00033962	0.0911152	0.0124362	0.00989602	0.00254015	5	122372479	+	Island	PPIC
31	cg01495834	3.34e-07	0.00670651	0.616658	0.712991	-0.0963328	5	125965934	-	OpenSea	TEX43
954	cg10143189	7.53e-05	0.0519087	0.619921	0.704477	-0.0845558	5	130964910	-	OpenSea	RAPGEF6;RAPGEF6;RAPGEF6;RAPGEF6;RAPGEF6;RAPGEF6
1363	cg05533233	0.000138369	0.0666419	0.800677	0.837481	-0.0368042	5	131625241	-	N_Shelf
1947	cg25470731	0.000240964	0.081382	0.028296	0.0204502	0.00784584	5	132112891	-	Island	SEPT8;SEPT8;SEPT8;SEPT8;SEPT8;SEPT8;SEPT8	high-CpG:132140786-132141020
505	cg02717486	2.73e-05	0.0356118	0.13572	0.0760915	0.0596285	5	133512833	-	Island	SKP1;SKP1
2139	cg22075671	0.000283191	0.0869799	0.0207177	0.0165293	0.00418838	5	133747798	-	Island	CDKN2AIPNL
1658	cg03991533	0.000187598	0.0743707	0.568678	0.618945	-0.0502669	5	133988402	+	S_Shelf	SEC24A
939	cg13624320	7.37e-05	0.0514617	0.0360746	0.0305329	0.00554163	5	134734938	+	Island	H2AFY;H2AFY;H2AFY;H2AFY	high-CpG:134762695-134763582
306	cg05521474	1.23e-05	0.0260124	0.935225	0.949691	-0.0144665	5	135082196	-	OpenSea
2297	cg15648832	0.000310586	0.0889123	0.806415	0.836088	-0.0296729	5	135322425	+	OpenSea					TRUE
820	cg03625177	5.99e-05	0.0479671	0.0187215	0.014472	0.0042495	5	135364556	-	Island	TGFBI	high-CpG:135392392-135392640
354	cg05578152	1.58e-05	0.0292505	0.836669	0.785124	0.051545	5	137270997	+	OpenSea	PKD2L2;PKD2L2;PKD2L2;PKD2L2
2014	cg14028022	0.000255369	0.0833778	0.869515	0.896224	-0.0267088	5	137686637	+	N_Shore
1272	cg01213128	0.000122338	0.0632175	0.0635171	0.0416012	0.0219159	5	138629571	-	Island	MATR3;MATR3	high-CpG:138657229-138657573
1350	cg17811228	0.000135882	0.0661866	0.0263278	0.0206096	0.00571823	5	139175116	-	Island	PSD2
2426	cg01534424	0.000335082	0.0908241	0.0593355	0.0434395	0.015896	5	139175399	+	Island	PSD2				TRUE
2770	cg25228995	0.000415258	0.0983804	0.959466	0.96966	-0.0101941	5	139260468	+	OpenSea	NRG2;NRG2;NRG2;NRG2				TRUE
2171	cg27111970	0.00028862	0.0874195	0.0201803	0.0164913	0.003689	5	139492957	+	Island	PURA
2669	cg09112262	0.000393229	0.0967949	0.716884	0.776357	-0.0594735	5	140049507	+	N_Shelf	WDR55
1343	cg23421926	0.000134271	0.0657426	0.0184511	0.0152648	0.00318629	5	141016472	+	Island	RELL2;RELL2;HDAC3
249	cg09254969	9.29e-06	0.0244409	0.0596424	0.0393029	0.0203395	5	141303622	-	Island	KIAA0141;KIAA0141
1594	cg00156633	0.00017706	0.0730159	0.714096	0.686775	0.0273208	5	148034578	-	S_Shore	HTR4;HTR4;HTR4;HTR4;HTR4;HTR4;HTR4			RDMR
1064	cg02716123	9.03e-05	0.0557857	0.0391408	0.0316417	0.00749902	5	148930628	-	Island	CSNK1A1;CSNK1A1;CSNK1A1;CSNK1A1
1655	cg25039547	0.000187203	0.0743365	0.751877	0.60748	0.144397	5	149333234	-	OpenSea			chr5:149333175-149333175
1414	cg21545248	0.000146822	0.0681494	0.671061	0.755969	-0.0849079	5	149402498	+	OpenSea	HMGXB3				TRUE
1618	cg13933692	0.000181065	0.0735863	0.0252985	0.0218983	0.00340019	5	149865429	-	Island		high-CpG:149845425-149846103
451	cg16440442	2.34e-05	0.0340466	0.694386	0.792669	-0.0982829	5	149980671	-	OpenSea	SYNPO;SYNPO	low-CpG:149960820-149960907
477	cg14838070	2.52e-05	0.0347214	0.912574	0.942276	-0.0297015	5	150030486	+	S_Shore	SYNPO;SYNPO;SYNPO;SYNPO				TRUE
2666	cg15817341	0.00039256	0.0967949	0.766481	0.812232	-0.0457515	5	150538450	+	S_Shore	ANXA6
2070	cg03822038	0.000268307	0.0852322	0.63803	0.73774	-0.0997105	5	151030721	+	OpenSea
1458	cg14341929	0.000154505	0.0696828	0.0990761	0.0612173	0.0378589	5	151031828	-	OpenSea
2113	cg18747105	0.000278568	0.0866908	0.84538	0.865259	-0.0198799	5	151129446	+	OpenSea	ATOX1		chr5:151129219-151129219
533	cg13950403	3.01e-05	0.0371345	0.0362032	0.0281926	0.00801066	5	153418565	-	Island	MFAP3;MFAP3;MFAP3;MFAP3;FAM114A2;MFAP3	high-CpG:153398715-153398779
500	cg01301842	2.66e-05	0.0350155	0.729815	0.781574	-0.0517593	5	156815746	-	OpenSea	CYFIP2;CYFIP2;CYFIP2;CYFIP2
86	cg12195133	1.28e-06	0.00969642	0.674149	0.546274	0.127875	5	158758075	+	N_Shore	LOC285626;IL12B				TRUE
2265	cg14803350	0.000304785	0.088359	0.129316	0.0980946	0.0312212	5	159545855	-	Island	PWWP2A;PWWP2A
2063	cg14658804	0.000266098	0.0848173	0.0189078	0.0168529	0.00205487	5	168728213	+	Island	SLIT3
1885	cg23338503	0.000228111	0.079575	0.0400925	0.0289882	0.0111043	5	169064530	-	Island	DOCK2			DMR
2562	cg04248157	0.000368198	0.0945026	0.0344311	0.0301001	0.004331	5	169930938	-	N_Shore	KCNIP1;KCNIP1;KCNIP1
2807	cg27294288	0.000421036	0.0986321	0.731822	0.786225	-0.0544029	5	170750725	-	OpenSea					TRUE
122	cg26561207	2.63e-06	0.0139844	0.14258	0.0906296	0.0519504	5	171615258	+	Island	STK10;STK10	high-CpG:171547764-171548030
921	cg25338204	7.18e-05	0.0512108	0.854549	0.908215	-0.0536661	5	175955105	+	OpenSea	RNF44	low-CpG:175887184-175888333
1796	cg05022341	0.000213069	0.0779718	0.0254062	0.023268	0.00213828	5	176074015	-	N_Shore	TSPAN17;TSPAN17;TSPAN17				TRUE
2634	cg17091196	0.000384708	0.0960331	0.838425	0.887344	-0.0489195	5	176584833	-	OpenSea	NSD1;NSD1
714	cg27139941	4.72e-05	0.0434598	0.952231	0.965998	-0.0137677	5	176894950	-	S_Shore	DBN1;DBN1
1261	cg25379854	0.000120868	0.062983	0.0122753	0.0100243	0.00225096	5	176900283	+	OpenSea	DBN1;DBN1
1244	cg19479828	0.000117033	0.0618626	0.872531	0.905961	-0.03343	5	177555469	-	N_Shelf
1093	cg16257040	9.47e-05	0.0569592	0.0131892	0.0112265	0.00196268	5	177557700	-	Island	RMND5B
513	cg23977063	2.81e-05	0.0360111	0.0681735	0.0567632	0.0114104	5	177659926	+	Island	AGXT2L2
623	cg07831432	3.77e-05	0.0398402	0.0122283	0.00995222	0.00227604	5	179125659	-	Island	CANX;CANX	high-CpG:179057968-179058852
197	cg01084379	6.02e-06	0.0199337	0.0743854	0.0484399	0.0259455	5	179160712	+	S_Shore	MAML1
2656	cg15609150	0.000390654	0.0967078	0.496121	0.566691	-0.0705701	5	179197801	-	OpenSea	MAML1
466	cg05578452	2.46e-05	0.0346252	0.839758	0.884229	-0.0444715	5	179255653	+	OpenSea	SQSTM1;SQSTM1;SQSTM1				TRUE
492	cg12684744	2.62e-05	0.0349904	0.489911	0.566748	-0.0768366	5	179636617	+	S_Shore	RASGEF1C
782	cg01860805	5.51e-05	0.0461814	0.843262	0.911236	-0.0679738	5	180659749	-	N_Shore	TRIM41;TRIM41
1893	cg08985338	0.000229667	0.0797791	0.758198	0.808758	-0.0505595	6	2390886	+	OpenSea	GMDS-AS1
778	cg27001747	5.5e-05	0.0461814	0.0588365	0.0413874	0.017449	6	2971685	+	Island	SERPINB6;SERPINB6;SERPINB6;SERPINB6;SERPINB6;SERPINB6;SERPINB6;SERPINB6	high-CpG:2916418-2916982
1977	cg21526654	0.000247247	0.0821872	0.0249195	0.0212269	0.00369263	6	3157927	-	Island	TUBB2A	high-CpG:3102894-3102947
1812	cg08754725	0.000215913	0.0783541	0.969016	0.979038	-0.0100223	6	3293098	-	OpenSea	SLC22A23;SLC22A23
2489	cg04050020	0.00034925	0.0921536	0.0211542	0.0171968	0.00395737	6	4776995	+	Island	CDYL;CDYL;CDYL	high-CpG:4721983-4722006
615	cg23213758	3.66e-05	0.0391253	0.80186	0.837053	-0.0351931	6	6605918	-	OpenSea	LOC285780;LY86
283	cg09866303	1.09e-05	0.025161	0.956383	0.964698	-0.0083149	6	7142638	+	S_Shore	RREB1;RREB1;RREB1;RREB1
682	cg22804502	4.4e-05	0.0424111	0.0211905	0.016667	0.00452343	6	7389831	+	Island	CAGE1;CAGE1;CAGE1;CAGE1;CAGE1;CAGE1;RIOK1	high-CpG:7334700-7335184
2229	cg05896563	0.00029845	0.0880095	0.0188305	0.0161232	0.00270726	6	7390048	-	Island	CAGE1;CAGE1;RIOK1;CAGE1	high-CpG:7334700-7335184
2277	cg07136949	0.000306098	0.0883667	0.723594	0.763699	-0.0401057	6	7986672	+	Island	MGC26597
990	cg26165406	7.98e-05	0.0527569	0.0262132	0.0206965	0.0055167	6	8435716	+	Island	SLC35B3;SLC35B3;SLC35B3;SLC35B3;SLC35B3;SLC35B3	high-CpG:8380699-8380877
276	cg22489991	1.06e-05	0.025161	0.652169	0.7312	-0.0790317	6	11383195	+	OpenSea	NEDD9;NEDD9
550	cg19005620	3.17e-05	0.0378323	0.799755	0.850224	-0.050469	6	11417343	-	OpenSea
1978	cg20011562	0.000247277	0.0821872	0.0254152	0.0196647	0.00575048	6	12749352	-	N_Shore	PHACTR1
1919	cg00273754	0.000235293	0.080626	0.850989	0.89503	-0.044041	6	14305310	+	OpenSea					TRUE
1996	cg19147499	0.000250839	0.082624	0.657769	0.717106	-0.0593377	6	16234615	-	N_Shelf
453	cg00952573	2.37e-05	0.0341701	0.533471	0.60847	-0.0749983	6	18210046	-	OpenSea	KDM1B
357	cg11483359	1.59e-05	0.0292505	0.628575	0.710714	-0.082139	6	19712715	-	OpenSea
1169	cg18595624	0.000105502	0.0591738	0.92314	0.93819	-0.0150504	6	20319415	+	OpenSea
822	cg18761994	6.01e-05	0.0479671	0.0301835	0.0236883	0.00649526	6	24911326	-	S_Shore	FAM65B			DMR
41	cg21367769	4.32e-07	0.00682638	0.719267	0.813537	-0.0942694	6	25651194	-	N_Shore	SCGN
2143	cg27209395	0.000283551	0.0869799	0.0110441	0.00944466	0.00159949	6	26172397	-	Island
775	cg08135787	5.46e-05	0.0461814	0.0326766	0.024888	0.00778859	6	26538969	-	Island	HMGN4
2799	cg26584966	0.000419351	0.0984813	0.788559	0.838369	-0.0498104	6	26541538	+	S_Shelf	HMGN4
60	cg08782481	6.75e-07	0.00734889	0.0721718	0.0442746	0.0278971	6	27839916	-	Island	HIST1H3I			DMR
2204	cg21380365	0.000294952	0.087922	0.781576	0.810436	-0.0288605	6	27865980	-	OpenSea
217	cg18649503	7.14e-06	0.0214411	0.808262	0.867093	-0.0588309	6	28187510	+	S_Shore	LOC222699
2579	cg23936402	0.000371398	0.0946956	0.652684	0.621803	0.0308811	6	28499703	-	OpenSea	GPX5;GPX5
1869	cg13187764	0.000224228	0.0788901	0.138142	0.12299	0.0151524	6	28677521	+	OpenSea
1385	cg07266126	0.000142462	0.0675777	0.0210931	0.0177017	0.00339138	6	28710766	-	OpenSea
1608	cg21568286	0.000179599	0.0734098	0.0137757	0.0117533	0.00202241	6	28891111	-	Island	TRIM27
1898	cg07652774	0.000230432	0.0798341	0.936536	0.954017	-0.0174803	6	29003922	+	OpenSea
693	cg18344922	4.51e-05	0.0427519	0.0271213	0.0216941	0.00542719	6	29595661	-	Island	GABBR1;GABBR1;GABBR1;GABBR1
388	cg19456996	1.86e-05	0.0315026	0.156055	0.101293	0.0547614	6	29600642	+	Island	GABBR1;GABBR1;GABBR1;GABBR1
766	cg23027574	5.41e-05	0.0461814	0.0226454	0.0163613	0.00628406	6	30043194	-	Island	RNF39;RNF39
430	cg24846791	2.18e-05	0.0333145	0.584986	0.692861	-0.107875	6	30074616	-	S_Shelf	TRIM31
1649	cg16257013	0.000186834	0.0743365	0.747288	0.785401	-0.0381133	6	30167403	-	OpenSea	TRIM26
1591	cg10793756	0.000176584	0.072983	0.0203847	0.0173618	0.00302289	6	30181014	+	Island	TRIM26
2025	cg11363197	0.00025788	0.0837184	0.855706	0.886664	-0.0309575	6	30610729	+	N_Shelf	C6orf134
1990	cg07660862	0.000249568	0.0824666	0.0277289	0.0238257	0.00390316	6	30615405	-	Island	C6orf136;C6orf136;C6orf136
370	cg21412928	1.66e-05	0.0293849	0.0309193	0.022579	0.00834032	6	30640498	-	Island	DHX16;DHX16
1111	cg19504658	9.7e-05	0.0572969	0.0233456	0.0193183	0.00402731	6	30655197	+	Island	KIAA1949;KIAA1949;KIAA1949
1447	cg03791799	0.000151575	0.0688431	0.885491	0.9134	-0.0279092	6	30686368	+	N_Shore	MDC1
2471	cg09179723	0.000344649	0.0916811	0.78494	0.838539	-0.0535984	6	30704955	+	OpenSea	FLOT1
902	cg25796098	7.02e-05	0.0510953	0.0289484	0.018923	0.0100254	6	30710373	-	Island	FLOT1;FLOT1	high-CpG:30818198-30818657
1721	cg25005633	0.000197468	0.0754361	0.0146231	0.0122852	0.00233793	6	30882094	-	Island	VARS2;VARS2;VARS2;VARS2;VARS2
145	cg14362428	3.64e-06	0.0164201	0.918221	0.952291	-0.0340705	6	31116408	+	OpenSea	CCHCR1;CCHCR1;CCHCR1
1316	cg14331998	0.000129341	0.064628	0.93777	0.959557	-0.0217869	6	31122388	+	N_Shelf	CCHCR1;CCHCR1;CCHCR1
2804	cg01373932	0.000420151	0.0985301	0.937536	0.963799	-0.0262635	6	31502462	+	OpenSea	BAT1;BAT1
2800	cg04016730	0.000419376	0.0984813	0.581714	0.712111	-0.130397	6	31513886	+	S_Shelf	NFKBIL1;NFKBIL1;ATP6V1G2;NFKBIL1;NFKBIL1;ATP6V1G2
698	cg24540603	4.57e-05	0.043022	0.766986	0.817556	-0.0505702	6	31547917	+	N_Shore
1313	cg15132055	0.000128999	0.0646043	0.858486	0.890791	-0.0323052	6	31624649	-	N_Shelf	APOM
1635	cg03560996	0.000184164	0.0740675	0.699088	0.754389	-0.0553008	6	31733908	-	OpenSea	C6orf27
2072	cg27021666	0.000268794	0.0852935	0.593083	0.689297	-0.0962136	6	31794278	+	N_Shore	HSPA1B			DMR
234	cg05680710	8.14e-06	0.0228474	0.786904	0.850968	-0.0640635	6	31868144	+	N_Shore	ZBTB12
2365	cg24009362	0.000321023	0.0892229	0.752866	0.824356	-0.0714901	6	32051584	+	N_Shelf	TNXB
1372	cg10010480	0.000140101	0.0671473	0.0214867	0.0168789	0.00460777	6	33160969	-	Island	COL11A2;COL11A2;COL11A2;COL11A2
925	cg23581489	7.21e-05	0.0512108	0.774708	0.850317	-0.0756094	6	33164210	+	N_Shelf	RXRB
508	cg18020679	2.77e-05	0.0357628	0.0265696	0.021231	0.00533862	6	33168031	+	Island	SLC39A7;SLC39A7;RXRB
1710	cg16199665	0.000195729	0.075224	0.032099	0.0247527	0.00734633	6	33168045	+	Island	SLC39A7;SLC39A7;RXRB
2475	cg04318435	0.000345578	0.0917635	0.0190055	0.0160411	0.00296445	6	33217193	-	Island
2635	cg19241689	0.000384865	0.0960331	0.0162852	0.0132953	0.00298993	6	33245516	-	Island	B3GALT4				TRUE
715	cg08312215	4.75e-05	0.0436792	0.0296047	0.0233583	0.00624638	6	33266943	+	Island	RGL2;RGL2;RGL2	high-CpG:33374370-33375214
886	cg15166642	6.75e-05	0.0500851	0.861856	0.890219	-0.0283633	6	33278020	-	N_Shelf	TAPBP;TAPBP;TAPBP
396	cg14006309	1.93e-05	0.0319076	0.0253877	0.0197485	0.00563923	6	33281552	+	Island	TAPBP;TAPBP;TAPBP
1528	cg13962943	0.000166144	0.0714025	0.0215638	0.0179284	0.00363537	6	33385698	-	Island	CUTA;CUTA;CUTA;CUTA;CUTA;CUTA;CUTA	high-CpG:33493640-33494075
1932	cg16463733	0.000238957	0.0813093	0.0195739	0.0160631	0.00351077	6	33422266	+	Island	ZBTB9
1578	cg25192717	0.000174054	0.07253	0.569563	0.660017	-0.0904538	6	33423156	+	S_Shore	ZBTB9
1577	cg26717016	0.000173999	0.07253	0.952852	0.966493	-0.0136414	6	33424210	+	S_Shore	ZBTB9
575	cg12770425	3.34e-05	0.0382042	0.722824	0.643506	0.0793174	6	33585071	-	N_Shelf
1214	cg16739976	0.000112594	0.0609618	0.87897	0.904422	-0.0254513	6	34101401	-	OpenSea	GRM4;GRM4
47	cg08961047	5.13e-07	0.00708837	0.93407	0.964681	-0.0306116	6	34395138	+	S_Shore	RPS10
338	cg19355881	1.46e-05	0.0284601	0.0204239	0.0178039	0.00261995	6	34759549	+	Island	UHRF1BP1	high-CpG:34867290-34867884
1197	cg21877541	0.000109985	0.0604203	0.686823	0.724184	-0.0373604	6	37512857	-	OpenSea
1467	cg15119683	0.000155572	0.0697337	0.618925	0.656527	-0.037602	6	38533031	-	OpenSea	BTBD9;BTBD9;BTBD9;BTBD9
409	cg24199218	2e-05	0.0322004	0.0363589	0.030756	0.00560286	6	41702250	-	Island	TFEB;TFEB;TFEB;TFEB;TFEB
1108	cg17767659	9.65e-05	0.0572647	0.0223941	0.019763	0.00263112	6	41888922	+	Island	MED20;BYSL
1036	cg20646500	8.64e-05	0.0547469	0.508034	0.59643	-0.0883961	6	42536105	-	S_Shelf	UBR2
1497	cg04530460	0.000159621	0.070115	0.0155639	0.0124555	0.00310833	6	42858550	+	Island	C6orf226;C6orf226	high-CpG:42966515-42966574		RDMR
2668	cg00881883	0.000392864	0.0967949	0.0217479	0.0177688	0.00397912	6	42897299	+	Island	CNPY3;CNPY3
980	cg20434586	7.87e-05	0.0526705	0.0681141	0.0403103	0.0278038	6	43237511	+	Island	TTBK1
2187	cg18857062	0.000292045	0.0877826	0.0342673	0.0258089	0.00845836	6	43276478	+	Island	CRIP3				TRUE
2231	cg03166160	0.000298679	0.0880095	0.901144	0.919209	-0.0180652	6	43345603	+	OpenSea
2828	cg06664023	0.000425796	0.0989762	0.0166265	0.0143694	0.00225713	6	43395409	+	Island		high-CpG:43503239-43503602
2653	cg17526727	0.000390049	0.0966766	0.689429	0.731313	-0.0418838	6	43791674	-	OpenSea
1720	cg25494480	0.000197445	0.0754361	0.019758	0.0156946	0.00406337	6	45387917	+	Island	RUNX2;RUNX2			RDMR
1906	cg22219371	0.000232443	0.080183	0.880925	0.910971	-0.0300456	6	45621648	-	OpenSea
97	cg12894525	1.72e-06	0.0116613	0.85307	0.888519	-0.035449	6	52165602	-	OpenSea
673	cg03651852	4.27e-05	0.0417618	0.0202073	0.0163481	0.00385922	6	52285170	-	Island	EFHC1;EFHC1	high-CpG:52392907-52393163
1709	cg10369451	0.000195697	0.075224	0.0115683	0.0102203	0.00134808	6	53213754	+	Island	ELOVL5;ELOVL5	high-CpG:53321635-53321763		DMR
432	cg21442906	2.2e-05	0.0333145	0.02658	0.0212525	0.00532748	6	56820078	+	Island	BEND6;DST;BEND6
529	cg24390275	2.96e-05	0.036795	0.790577	0.844162	-0.0535856	6	56860507	-	OpenSea	BEND6
1799	cg06877701	0.00021396	0.0782066	0.709481	0.749943	-0.0404621	6	71103386	+	OpenSea	EVADR
1816	cg25909892	0.000216849	0.078486	0.905311	0.929751	-0.0244396	6	74105065	-	S_Shore	DDX43
1503	cg07582070	0.00016047	0.0701776	0.767368	0.798439	-0.0310702	6	75946061	-	OpenSea
2436	cg18729664	0.000337294	0.0910303	0.476381	0.559984	-0.0836032	6	76203675	-	OpenSea	FILIP1				TRUE
2155	cg02129147	0.000286194	0.0872939	0.780848	0.817047	-0.0361992	6	76639575	+	OpenSea	IMPG1;IMPG1
1462	cg12863418	0.000154954	0.0696888	0.799635	0.834838	-0.0352022	6	77559450	+	OpenSea
2176	cg17870270	0.000289862	0.087557	0.0318469	0.0268941	0.00495277	6	80247259	-	Island	LCA5;LCA5
709	cg15532991	4.69e-05	0.0434389	0.898875	0.914469	-0.0155938	6	81153220	+	OpenSea
386	cg04137380	1.81e-05	0.030783	0.0278595	0.020839	0.00702055	6	88182602	-	Island	SLC35A1;SLC35A1
1766	cg12073865	0.000207646	0.0773167	0.0355839	0.0248915	0.0106924	6	90121279	-	Island	RRAGD			DMR	TRUE
220	cg26521213	7.17e-06	0.0214411	0.0289583	0.0238516	0.00510672	6	90529568	+	Island	MDN1	high-CpG:90586133-90586308
1374	cg25614119	0.000140817	0.0673922	0.627294	0.583844	0.04345	6	97061750	+	OpenSea	FHL5;FHL5
2820	cg20797858	0.000424292	0.0989366	0.0207859	0.0174553	0.00333055	6	99283304	+	Island	POU3F2			DMR
1684	cg19650814	0.000191656	0.074708	0.0153357	0.0132901	0.00204564	6	100016539	+	Island	CCNC;CCNC;CCNC	high-CpG:100123208-100123282
222	cg23687258	7.28e-06	0.0214951	0.064726	0.036639	0.028087	6	106808749	-	Island					TRUE
1051	cg12448860	8.85e-05	0.0554012	0.0322076	0.028156	0.00405155	6	106959601	+	N_Shore	AIM1
2218	cg22885965	0.000297157	0.087994	0.0204294	0.0180532	0.00237623	6	107077115	-	OpenSea	QRSL1;RTN4IP1;RTN4IP1
982	cg27311710	7.87e-05	0.0526705	0.0235126	0.0190857	0.00442688	6	107349326	+	Island	C6orf203;C6orf203;C6orf203
1599	cg05830192	0.000178197	0.0732556	0.0215756	0.0178114	0.00376419	6	107436188	+	Island	BEND3
233	cg18035158	8.06e-06	0.0227482	0.0407138	0.0301363	0.0105775	6	107810971	-	Island	SOBP
2262	cg17969853	0.000304576	0.088359	0.962029	0.963044	-0.00101517	6	108615613	-	N_Shore	LACE1
1588	cg04255814	0.000176035	0.0728939	0.877418	0.89821	-0.0207928	6	109072980	-	OpenSea	LINC00222
2441	cg19414224	0.000338447	0.0910968	0.0138525	0.0116728	0.00217972	6	109415890	-	Island	CEP57L1;CEP57L1;CEP57L1;SESN1	high-CpG:109522351-109523322
2577	cg12793863	0.000371296	0.0946956	0.744962	0.80338	-0.0584179	6	109612628	+	S_Shore
2721	cg08390865	0.000404194	0.0976793	0.0132864	0.0103349	0.00295157	6	110299446	-	Island	GPR6;GPR6			DMR
27	cg01309418	2.77e-07	0.00655192	0.676945	0.771719	-0.094774	6	111278585	+	N_Shore	GTF3C6
2810	cg26557001	0.000421547	0.0986463	0.905069	0.917366	-0.0122973	6	113163252	-	OpenSea
2560	cg00533923	0.000366411	0.0941174	0.0336141	0.0307961	0.00281801	6	116892543	-	Island	RWDD1;RWDD1;RWDD1	high-CpG:116999045-116999363
944	cg17382198	7.41e-05	0.0516202	0.0215466	0.0178229	0.00372365	6	125284203	-	Island	STL			DMR
2058	cg01444279	0.000265545	0.0847885	0.105259	0.0638756	0.0413835	6	125420676	-	N_Shore			chr6:125420389-125420389		TRUE
1262	cg10683054	0.000120876	0.062983	0.0227271	0.019268	0.00345908	6	132129037	-	Island	ENPP1
2627	cg04068042	0.00038313	0.095902	0.0597621	0.0388526	0.0209095	6	132272342	-	Island	CTGF;CTGF
604	cg16626958	3.56e-05	0.0387783	0.62052	0.591205	0.0293146	6	136394502	+	OpenSea	PDE7B
846	cg19236700	6.39e-05	0.0496566	0.0465069	0.0330338	0.0134731	6	138428792	+	Island	PERP	high-CpG:138470243-138470715
218	cg15875995	7.15e-06	0.0214411	0.019874	0.0139844	0.00588961	6	139308823	-	Island	REPS1;REPS1;REPS1;REPS1;REPS1;REPS1;REPS1;REPS1
228	cg15281724	7.61e-06	0.0219476	0.813683	0.877403	-0.06372	6	139575994	-	OpenSea	TXLNB				TRUE
183	cg16559268	5.4e-06	0.0194047	0.234731	0.153673	0.0810584	6	143193224	+	OpenSea	HIVEP2		chr6:143192899-143192899
1024	cg21257371	8.41e-05	0.0540086	0.880261	0.895856	-0.0155941	6	143421149	+	OpenSea	AIG1;AIG1;AIG1;AIG1
1832	cg04292938	0.000218974	0.0785976	0.897037	0.859615	0.0374221	6	143838685	+	OpenSea					TRUE
1529	cg16079802	0.00016641	0.0714025	0.044128	0.0414746	0.00265335	6	143857657	-	N_Shore
1183	cg15380588	0.000106544	0.0591738	0.0197793	0.015445	0.00433431	6	144606480	-	Island		high-CpG:144647583-144648547
2401	cg23696752	0.000330073	0.0903981	0.0557425	0.0470059	0.00873665	6	146349312	-	N_Shore	GRM1;GRM1			CDMR
1103	cg08164950	9.63e-05	0.0572647	0.837599	0.880014	-0.0424157	6	147981771	-	OpenSea
2862	cg00166836	0.000433671	0.0996396	0.828636	0.88089	-0.0522538	6	149721425	+	OpenSea	MAP3K7IP2;SUMO4
2163	cg11399097	0.000287271	0.0872939	0.0176434	0.0152014	0.00244195	6	150390190	-	Island	ULBP3
724	cg17846723	4.91e-05	0.044509	0.702119	0.747339	-0.0452198	6	151380091	+	OpenSea	MTHFD1L;MTHFD1L;MTHFD1L
2766	cg20407861	0.000414003	0.0983804	0.684665	0.734043	-0.0493786	6	151612965	+	OpenSea	AKAP12				TRUE
2315	cg16746174	0.000314196	0.0891098	0.0178378	0.0149369	0.00290096	6	155635665	+	Island	TFB1M
1914	cg02079880	0.000234014	0.0803974	0.0144417	0.0119647	0.00247695	6	157802436	+	Island	ZDHHC14;ZDHHC14	high-CpG:157722150-157722728
23	cg17016703	1.73e-07	0.00494549	0.895136	0.935941	-0.040805	6	158211003	+	OpenSea
539	cg22229076	3.04e-05	0.0371345	0.029189	0.0239829	0.00520609	6	158589318	+	Island	SERAC1;GTF2H5
137	cg20364594	3.26e-06	0.0156235	0.0272237	0.0203423	0.00688138	6	158981615	+	Island	TMEM181
2689	cg23488616	0.000396296	0.0968894	0.0584316	0.0422467	0.0161849	6	159065864	+	S_Shore	DYNLT1
793	cg06562043	5.61e-05	0.0464499	0.0202801	0.0167931	0.00348709	6	159240453	+	Island	EZR-AS1;EZR;EZR;EZR	high-CpG:159160283-159160468
460	cg26992213	2.39e-05	0.0342126	0.0181088	0.0145401	0.00356866	6	159290838	-	Island					TRUE
1106	cg01374729	9.64e-05	0.0572647	0.0219272	0.0178847	0.00404254	6	159420963	+	Island	RSPH3	high-CpG:159340890-159340972
1295	cg18656310	0.000125209	0.0635685	0.927689	0.903772	0.0239162	6	160505244	+	OpenSea	IGF2R
2080	cg02647866	0.000271143	0.0857187	0.830187	0.833886	-0.00369843	6	161353323	-	S_Shore
2524	cg26217832	0.000354928	0.0924682	0.865121	0.884649	-0.0195283	6	161638008	+	OpenSea	AGPAT4
752	cg00319034	5.26e-05	0.0459573	0.663969	0.689369	-0.0254005	6	162670883	+	OpenSea	PARK2;PARK2;PARK2
712	cg21607700	4.71e-05	0.0434389	0.907884	0.934038	-0.0261542	6	166344313	-	OpenSea	C6orf176
229	cg26214765	7.75e-06	0.022206	0.566283	0.640322	-0.0740389	6	166797748	-	S_Shore	BRP44L
1302	cg18949300	0.000125926	0.0635983	0.0494504	0.0362196	0.0132308	6	167275778	-	Island	RPS6KA2			DMR
1038	cg27096477	8.65e-05	0.0547469	0.897652	0.93727	-0.0396186	6	168476553	+	Island	FRMD1;FRMD1
829	cg25389470	6.14e-05	0.0486097	0.0272945	0.0219679	0.00532659	6	170599392	+	Island	DLL1;DLL1
1306	cg18239372	0.000127554	0.0642234	0.0242304	0.0200062	0.00422417	6	170600562	-	Island	DLL1
1332	cg06893980	0.000132435	0.0653746	0.0255353	0.0229608	0.0025745	6	170862231	-	Island	PSMB1;TBP
2690	cg13649242	0.00039636	0.0968894	0.0311229	0.0235505	0.00757236	6	170893854	+	Island	PDCD2;PDCD2
770	cg08146698	5.44e-05	0.0461814	0.964862	0.97167	-0.0068081	7	178613	+	Island
1949	cg22466784	0.000241343	0.0814102	0.949326	0.96113	-0.0118035	7	540176	-	OpenSea	PDGFA;PDGFA
818	cg14526322	5.96e-05	0.0479201	0.917729	0.94334	-0.0256108	7	598979	-	N_Shore	PRKAR1B;PRKAR1B;PRKAR1B;PRKAR1B;PRKAR1B;PRKAR1B
1916	cg08482359	0.000234581	0.0805078	0.969515	0.975726	-0.00621132	7	622834	-	OpenSea	PRKAR1B;PRKAR1B;PRKAR1B;PRKAR1B;PRKAR1B;PRKAR1B
2784	cg23085023	0.000416814	0.0984161	0.939464	0.933085	0.00637934	7	780584	-	Island	HEATR2
559	cg23237765	3.24e-05	0.0379527	0.702973	0.795727	-0.0927545	7	921845	-	S_Shelf	C7orf20
2424	cg25423225	0.000334871	0.090805	0.927294	0.954841	-0.0275473	7	935108	-	Island	C7orf20
1459	cg23451063	0.000154711	0.0696888	0.874034	0.905399	-0.0313646	7	1059876	+	Island	C7orf50;C7orf50;C7orf50
1794	cg27205928	0.000212659	0.0779476	0.967197	0.971746	-0.00454831	7	1062652	+	Island	C7orf50;C7orf50;C7orf50;MIR339		chr7:1062588-1062588
2735	cg02133809	0.000408077	0.0980866	0.839633	0.918638	-0.0790055	7	1234925	+	OpenSea
1556	cg09373254	0.000170616	0.0720841	0.79255	0.844887	-0.0523365	7	1249475	-	N_Shore				RDMR
805	cg05974178	5.79e-05	0.047285	0.673806	0.609061	0.0647446	7	1694786	+	OpenSea
1341	cg27527798	0.000134041	0.0656888	0.85314	0.905396	-0.0522555	7	1773245	+	OpenSea	ELFN1			CDMR
1416	cg22700036	0.000147091	0.0681494	0.978498	0.982072	-0.00357349	7	2044181	-	N_Shore	MAD1L1;MAD1L1;MAD1L1
2060	cg20347042	0.000265731	0.0847885	0.84957	0.893573	-0.0440027	7	2122685	+	OpenSea	MAD1L1;MAD1L1;MAD1L1				TRUE
1994	cg00373376	0.000250304	0.0825085	0.952721	0.96408	-0.0113586	7	2130669	-	OpenSea	MAD1L1;MAD1L1;MAD1L1
1344	cg13571628	0.000134567	0.0657991	0.780126	0.819587	-0.0394613	7	2253713	+	S_Shelf	MAD1L1;MAD1L1;MAD1L1;MAD1L1;MAD1L1
1837	cg22086566	0.000219873	0.0786595	0.932264	0.940721	-0.00845667	7	3989097	+	OpenSea	SDK1				TRUE
971	cg09394666	7.79e-05	0.0526705	0.703346	0.741819	-0.0384738	7	4817726	-	S_Shelf	KIAA0415
506	cg25127850	2.75e-05	0.035697	0.0239989	0.018975	0.00502392	7	6144372	+	Island	USP42
2780	cg13977660	0.000415935	0.0983804	0.660692	0.719441	-0.058749	7	6147984	+	S_Shelf	USP42
1780	cg07651182	0.000210392	0.0776768	0.814186	0.845756	-0.0315694	7	6190632	+	N_Shelf	USP42
2757	cg26774430	0.000412159	0.0982737	0.0330594	0.0260017	0.00705763	7	6312054	+	Island	CYTH3	high-CpG:6278565-6278851
1184	cg17686236	0.000106547	0.0591738	0.824921	0.860609	-0.0356885	7	6444640	+	S_Shelf
2388	cg25289314	0.000326162	0.0897599	0.0503144	0.0381752	0.0121393	7	6570511	+	Island	GRID2IP
2356	cg20964328	0.000320066	0.0892229	0.022026	0.0192467	0.00277936	7	11013816	-	Island	PHF14;PHF14;PHF14;PHF14
2410	cg12171249	0.000332079	0.0906078	0.521846	0.587495	-0.0656497	7	11606963	+	OpenSea	THSD7A		chr7:11606918-11606918
468	cg10399970	2.47e-05	0.0346252	0.942612	0.959603	-0.0169917	7	12510772	-	OpenSea			chr7:12510735-12510735
2029	cg19744025	0.000258478	0.083769	0.453634	0.480674	-0.0270399	7	17884930	+	OpenSea	SNX13
1901	cg07994345	0.00023085	0.0798526	0.712176	0.769758	-0.0575829	7	19969042	-	OpenSea	LOC101927668
372	cg21710826	1.66e-05	0.0293849	0.218238	0.126878	0.0913599	7	20240145	+	OpenSea	MACC1		chr7:20239950-20239950		TRUE
2412	cg09256781	0.000332531	0.090656	0.0430435	0.0343316	0.00871192	7	23145220	-	Island	KLHL7;KLHL7
1157	cg10258962	0.000103835	0.0590135	0.684825	0.74096	-0.0561349	7	23526811	-	N_Shelf
2422	cg18857889	0.000334694	0.090805	0.320117	0.253909	0.0662087	7	23719661	-	Island	C7orf46;C7orf46;C7orf46
1410	cg04215179	0.000145939	0.0680232	0.128084	0.0834857	0.0445982	7	23719682	-	Island	C7orf46;C7orf46;C7orf46
2762	cg06807960	0.000413216	0.0983631	0.018048	0.0156445	0.0024035	7	26904159	-	Island	SKAP2;SKAP2
1192	cg10636403	0.000109096	0.0601829	0.0722302	0.046102	0.0261282	7	27136486	-	Island	HOXA1;HOXA1			DMR	TRUE
2045	cg05250768	0.000261847	0.0841967	0.0268188	0.0202993	0.00651952	7	27209270	+	Island	MIR196B
1239	cg24172570	0.000116115	0.0616101	0.741145	0.776601	-0.0354556	7	27561178	-	OpenSea					TRUE
280	cg25037274	1.07e-05	0.025161	0.769045	0.846613	-0.077568	7	29872894	+	OpenSea	WIPF3
1830	cg02943305	0.000218872	0.0785976	0.354153	0.430087	-0.0759335	7	31685368	-	OpenSea	CCDC129				TRUE
1716	cg24587796	0.000196655	0.075358	0.879822	0.90531	-0.0254873	7	32979849	+	N_Shelf	RP9P
2576	cg08427928	0.000371095	0.0946956	0.0126429	0.00987382	0.0027691	7	32997111	-	Island	FKBP9;FKBP9	high-CpG:32963486-32963739
246	cg19080138	8.98e-06	0.0240099	0.0386859	0.0288721	0.00981374	7	35734733	+	Island	HERPUD2;HERPUD2	high-CpG:35700997-35701320
1275	cg02650121	0.000122771	0.0633179	0.961543	0.966269	-0.00472654	7	36124562	+	OpenSea					TRUE
2856	cg00729291	0.000432427	0.0995625	0.838288	0.896854	-0.0585658	7	38725630	+	OpenSea	FAM183B
2094	cg19104112	0.000275389	0.086327	0.032438	0.0272298	0.00520821	7	39663043	+	Island	RALA
1309	cg12737854	0.00012831	0.064456	0.973716	0.97803	-0.00431406	7	42005612	-	Island	GLI3
1304	cg19742965	0.000126371	0.0637249	0.89121	0.921438	-0.0302273	7	42006083	-	Island	GLI3
1691	cg04504821	0.000192229	0.074708	0.0172856	0.0152583	0.00202731	7	43769172	+	Island	COA1;COA1
1988	cg24664079	0.000248635	0.0822409	0.149164	0.116531	0.0326338	7	43908858	+	N_Shore	MRPS24;URGCP-MRPS24
554	cg18126572	3.19e-05	0.0378802	0.0177236	0.0150612	0.0026624	7	43909213	-	Island	MRPS24
1048	cg06224889	8.83e-05	0.0553969	0.0238642	0.0203071	0.0035571	7	44084287	-	Island	DBNL;DBNL;DBNL;DBNL;DBNL;DBNL;DBNL;DBNL;DBNL;DBNL	high-CpG:44050792-44050881
1084	cg11282898	9.31e-05	0.0564903	0.0648744	0.047124	0.0177504	7	44185904	+	S_Shore	GCK;GCK;GCK				TRUE
2293	cg18987535	0.000309332	0.0887078	0.820436	0.853058	-0.0326215	7	44522280	-	OpenSea	NUDCD3
2209	cg06300969	0.000295531	0.0879714	0.798509	0.804666	-0.00615734	7	46526492	-	OpenSea					TRUE
838	cg26319127	6.32e-05	0.0494944	0.0243756	0.0194638	0.00491183	7	48128776	-	Island	UPP1;UPP1;UPP1;UPP1;UPP1;UPP1;UPP1	high-CpG:48094750-48095706
160	cg20250336	4.34e-06	0.0175502	0.914069	0.948213	-0.0341438	7	51545565	+	OpenSea
1761	ch.7.53629068R	0.000205566	0.0767596	0.0586651	0.0459075	0.0127576	7	53661574	+	OpenSea
1960	cg00134032	0.000243888	0.0817975	0.492441	0.42702	0.0654213	7	55372268	+	OpenSea
2337	cg01877967	0.000317065	0.0891098	0.966611	0.972324	-0.00571251	7	56148907	-	OpenSea	PHKG1
2490	cg02761061	0.000349267	0.0921536	0.816717	0.85504	-0.0383236	7	64253339	-	N_Shore	ZNF138;ZNF138;ZNF138;ZNF138;ZNF138;ZNF138;ZNF138;ZNF138;ZNF138
998	cg06420603	8.03e-05	0.0529396	0.17477	0.131224	0.0435461	7	66460076	+	N_Shore	SBDS
958	cg22794712	7.59e-05	0.0520871	0.832638	0.877669	-0.045031	7	68973036	-	OpenSea
1643	cg17241289	0.000185502	0.0742211	0.825473	0.863308	-0.0378349	7	71747632	+	OpenSea	CALN1;CALN1
2584	cg22483286	0.000372795	0.0948677	0.975002	0.978095	-0.00309276	7	72727303	+	Island	TRIM50
1788	cg24575065	0.000211918	0.077906	0.0144982	0.012277	0.00222127	7	72972219	-	Island	BCL7B	high-CpG:72609352-72610281
1243	cg23536509	0.000116886	0.0618347	0.692573	0.732465	-0.0398924	7	73078403	-	N_Shelf
412	cg26307355	2.05e-05	0.0326967	0.893631	0.91448	-0.020849	7	73938543	+	OpenSea	GTF2IRD1;GTF2IRD1
2353	cg11494213	0.000319112	0.089179	0.0167985	0.0138383	0.00296019	7	75115627	-	Island	POM121C
936	cg25324045	7.35e-05	0.0514617	0.020794	0.0166062	0.00418772	7	75508474	+	Island	RHBDD2;RHBDD2;RHBDD2
1717	cg05435065	0.000196863	0.0753938	0.0516301	0.0358376	0.0157926	7	75544030	-	Island	POR
1860	cg08466464	0.000222942	0.0787757	0.860899	0.864497	-0.00359762	7	75557956	+	OpenSea	POR
657	cg08147703	4.13e-05	0.0413083	0.0564907	0.0416505	0.0148402	7	75624098	-	Island	TMEM120A
1449	cg18713528	0.000152078	0.0690063	0.0268566	0.0215233	0.0053333	7	75912071	+	Island	SRRM3
2736	cg27417922	0.000408117	0.0980866	0.0167579	0.0143277	0.00243019	7	75988359	+	Island	YWHAG
2311	ch.7.1699328F	0.000313501	0.0891098	0.0936006	0.074289	0.0193116	7	77226715	+	OpenSea	PTPN12;PTPN12;PTPN12
862	cg08212713	6.56e-05	0.0499208	0.0176339	0.0134645	0.00416937	7	77428059	-	Island	PHTF2;PHTF2;TMEM60
2606	cg04976780	0.000377582	0.0951883	0.0240657	0.0205734	0.00349239	7	77649540	+	Island	MAGI2	high-CpG:77486760-77487519
812	cg13116816	5.88e-05	0.0475472	0.666745	0.748717	-0.081972	7	86839071	-	OpenSea	C7orf23
482	cg02254698	2.56e-05	0.0348363	0.803557	0.848754	-0.0451967	7	87508528	+	S_Shelf	DBF4
1231	cg03571927	0.000114933	0.0613942	0.0359291	0.0316859	0.00424322	7	89748238	+	Island	DPY19L2P4			DMR
832	cg20895785	6.17e-05	0.0487686	0.0360186	0.0302376	0.00578108	7	89840850	-	Island	STEAP2;STEAP2
1422	cg23283875	0.000147506	0.0681494	0.0370539	0.0319125	0.00514136	7	89874597	+	Island	C7orf63;C7orf63;C7orf63;C7orf63
646	cg13760339	3.99e-05	0.0405989	0.0404319	0.0257161	0.0147158	7	92219536	+	Island	FAM133B;FAM133B;FAM133B;FAM133DP;FAM133B
953	cg24145357	7.52e-05	0.0518629	0.0421279	0.0269162	0.0152117	7	92219539	+	Island	FAM133B;FAM133B;FAM133B;FAM133DP;FAM133B
2220	cg09021390	0.000297258	0.087994	0.491148	0.362988	0.12816	7	94185539	+	OpenSea	CASD1
2675	cg07769806	0.000394205	0.0968446	0.0164501	0.0139879	0.00246217	7	95064281	+	Island	PON2;PON2;PON2;PON2	high-CpG:94902149-94902401
594	cg10548492	3.49e-05	0.0385686	0.0347328	0.0287415	0.00599127	7	96746798	-	Island	ACN9;ACN9
2845	cg04010165	0.000429859	0.0992983	0.0383765	0.0281452	0.0102313	7	97910878	+	Island	BRI3;BRI3	high-CpG:97748727-97748980
1891	cg12659287	0.000229492	0.0797683	0.927587	0.934986	-0.00739893	7	98565247	+	OpenSea	TRRAP
2174	cg16012478	0.000289052	0.0874293	0.688385	0.739649	-0.0512641	7	98609764	-	Island	TRRAP
636	cg15061591	3.9e-05	0.0402417	0.950579	0.963572	-0.0129925	7	98625706	-	OpenSea	SMURF1;SMURF1
1872	cg07163811	0.000225061	0.079056	0.0202507	0.0168288	0.0034219	7	99036496	-	Island	CPSF4;PTCD1;CPSF4	high-CpG:98874253-98874879
1279	cg16409335	0.000123309	0.0633276	0.772972	0.736768	0.0362044	7	99042228	-	OpenSea	ATP5J2-PTCD1;CPSF4;CPSF4
858	cg12042864	6.5e-05	0.0497997	0.832352	0.88875	-0.056398	7	99066260	-	S_Shelf
1451	cg27080725	0.000153252	0.0694511	0.0206845	0.0164361	0.00424839	7	100075304	+	Island	TSC22D4
1760	cg23606385	0.000205301	0.0767042	0.0310253	0.0257446	0.00528065	7	100136742	-	Island	AGFG2
801	cg18195498	5.74e-05	0.0471155	0.945163	0.964289	-0.0191265	7	100281506	-	N_Shelf	GIGYF1
1250	cg06221861	0.000118393	0.0622814	0.147497	0.08642	0.0610773	7	100425075	-	Island	EPHB4;EPHB4	high-CpG:100262971-100263085
1846	cg12481734	0.000221305	0.0787734	0.0175288	0.0153543	0.00217449	7	100472507	-	Island	SRRT;SRRT;SRRT;SRRT
2015	cg12294585	0.000255574	0.0834032	0.0182958	0.0145123	0.0037835	7	100472739	-	Island	SRRT;SRRT;SRRT;SRRT;SRRT;SRRT;SRRT;SRRT	high-CpG:100310607-100310780
2290	cg16131903	0.000308703	0.0886434	0.954661	0.963839	-0.0091778	7	100732109	+	Island	TRIM56
345	cg25550564	1.51e-05	0.0287161	0.0751577	0.0549035	0.0202542	7	100951845	+	OpenSea
17	cg06775669	1.33e-07	0.0048394	0.802142	0.86627	-0.0641283	7	101582572	-	OpenSea	CUX1;CUX1;CUX1;CUX1;CUX1;CUX1;CUX1
2322	cg17713751	0.000315253	0.0891098	0.956358	0.968185	-0.0118272	7	101723568	+	OpenSea	CUX1;CUX1;CUX1
2849	cg01449302	0.000430349	0.0992983	0.861868	0.823879	0.0379892	7	105264728	-	OpenSea	ATXN7L1;ATXN7L1;ATXN7L1;ATXN7L1
2193	cg21810311	0.000293765	0.087922	0.0133516	0.0115805	0.0017711	7	107384783	+	Island	CBLL1;CBLL1
864	cg03456512	6.57e-05	0.0499208	0.0407731	0.0345219	0.00625115	7	107531689	+	Island	DLD;DLD
2827	cg23469188	0.000425696	0.0989762	0.0402544	0.0313185	0.00893595	7	108166441	+	Island	PNPLA8
1123	cg00636363	9.87e-05	0.0576483	0.857674	0.892749	-0.0350756	7	112474547	-	OpenSea	C7orf60
2733	cg11746225	0.000406752	0.0978659	0.0223002	0.019353	0.0029472	7	116139942	+	Island	CAV2;CAV2;CAV2;CAV2
2182	cg22822137	0.000291	0.0876793	0.015962	0.0134415	0.00252044	7	116594107	+	Island	ST7-AS1;ST7-OT4;ST7;ST7
495	cg14382976	2.64e-05	0.0349968	0.908231	0.908212	1.85e-05	7	117067624	-	Island	ASZ1;ASZ1
1803	cg25241964	0.000214924	0.0783541	0.0502536	0.0373115	0.0129421	7	119912723	+	N_Shore	KCND2			DMR
1276	cg20977111	0.00012294	0.0633207	0.0347813	0.0295068	0.00527443	7	121036534	+	Island	FAM3C;FAM3C
1631	cg14377278	0.000183556	0.0739956	0.863585	0.874028	-0.0104436	7	122340168	-	OpenSea	RNF133;CADPS2;CADPS2;CADPS2
1149	cg20617676	0.000102511	0.0586307	0.0474395	0.0321283	0.0153112	7	123389167	-	Island	WASL	high-CpG:123175947-123176473
1938	cg10124255	0.00023989	0.081382	0.872016	0.881529	-0.00951317	7	124286338	-	OpenSea
1547	cg13131519	0.000168133	0.0714319	0.0314285	0.023098	0.00833059	7	127032423	-	Island	ZNF800;ZNF800
398	cg26642667	1.94e-05	0.0319076	0.297127	0.163017	0.13411	7	127292389	+	Island	SND1;SND1
2571	cg22366710	0.000370456	0.0946956	0.868361	0.885243	-0.0168813	7	127570651	-	OpenSea	SND1
1062	cg15740366	9e-05	0.0557309	0.015791	0.0121072	0.00368386	7	128049868	-	Island	IMPDH1;IMPDH1;IMPDH1;IMPDH1
1445	cg03877058	0.000151211	0.0688107	0.871911	0.888056	-0.0161441	7	129094356	-	OpenSea	STRIP2;STRIP2;STRIP2;STRIP2
2305	cg02817988	0.000312811	0.0891098	0.66149	0.491808	0.169681	7	130350225	+	N_Shelf	COPG2
754	cg15278043	5.3e-05	0.0461814	0.0335415	0.0217064	0.0118351	7	130353539	-	Island	TSGA13;COPG2;COPG2
272	cg03775632	1.04e-05	0.025161	0.886611	0.911109	-0.0244975	7	134632344	-	OpenSea	CALD1;CALD1;CALD1;CALD1;CALD1
649	cg09901100	4.01e-05	0.0405989	0.78363	0.853599	-0.0699685	7	134867116	+	OpenSea
2078	cg03604796	0.000270555	0.0856152	0.0163048	0.0138128	0.002492	7	134896227	-	Island	WDR91	high-CpG:134546735-134546840
2054	cg06043142	0.000264191	0.0845783	0.0212283	0.0161695	0.00505883	7	134896415	+	Island	WDR91
490	cg15535370	2.6e-05	0.034882	0.801207	0.849422	-0.0482148	7	135422508	+	OpenSea	FAM180A
1137	cg13734282	0.000100278	0.0579944	0.727036	0.601287	0.125748	7	137125473	+	OpenSea	DGKI				TRUE
2470	cg19046642	0.000344535	0.0916811	0.95235	0.960405	-0.00805554	7	138141133	-	N_Shelf
885	cg07117660	6.73e-05	0.0499804	0.0437568	0.0335729	0.0101839	7	138916021	-	Island	UBN2
446	cg07819926	2.31e-05	0.0339774	0.0105246	0.00872557	0.00179901	7	139025145	-	Island	C7orf55
1683	cg23022819	0.000191625	0.074708	0.81282	0.84746	-0.0346399	7	139690908	-	OpenSea	TBXAS1;TBXAS1;TBXAS1;TBXAS1;TBXAS1;TBXAS1
1420	cg20675019	0.000147376	0.0681494	0.0134217	0.0113271	0.00209467	7	140097962	-	Island	SLC37A3;SLC37A3
2740	cg15561997	0.000409012	0.0981299	0.103111	0.109515	-0.00640459	7	140207996	-	OpenSea
216	cg24524451	7.12e-06	0.0214411	0.101749	0.0562164	0.0455326	7	140372725	+	N_Shore	ADCK2	high-CpG:140019172-140019446
1908	cg05561993	0.000232919	0.0802727	0.0143662	0.0123807	0.00198555	7	140373033	-	Island	ADCK2;ADCK2
2556	cg05958020	0.000364851	0.0938593	0.828158	0.897422	-0.0692643	7	140401455	-	OpenSea	NDUFB2
1630	cg00656411	0.000183524	0.0739956	0.0521392	0.0438087	0.00833052	7	140773422	+	Island				DMR
1430	cg23738624	0.000148704	0.0683545	0.0222851	0.0188655	0.00341962	7	142553157	-	Island	EPHB6			DMR
2486	cg15153026	0.000348446	0.0921316	0.0310503	0.0276448	0.00340547	7	143058944	+	Island	FAM131B;FAM131B
427	cg06100147	2.13e-05	0.0328311	0.158938	0.0913093	0.0676288	7	143059260	-	Island	FAM131B;FAM131B
1504	cg11490986	0.000160552	0.0701776	0.02895	0.0246062	0.00434378	7	143599184	-	Island	FAM115A
59	cg02854490	6.36e-07	0.00708837	0.84212	0.88846	-0.0463393	7	144108266	-	OpenSea
1808	cg11644394	0.000215564	0.0783541	0.384249	0.493443	-0.109194	7	144148615	+	OpenSea
489	cg24808111	2.6e-05	0.034882	0.71855	0.805541	-0.0869917	7	148889824	+	N_Shelf
1388	cg16480132	0.000142698	0.0675777	0.0209584	0.0174248	0.00353355	7	149571111	+	Island	LOC401431;ATP6V0E2;ATP6V0E2	high-CpG:149201962-149202066
30	cg07998558	3.17e-07	0.00670651	0.83578	0.895361	-0.0595815	7	150648497	+	Island	KCNH2;KCNH2;KCNH2
607	cg14587446	3.59e-05	0.0389224	0.0107204	0.00960328	0.00111715	7	150672364	-	Island	KCNH2;KCNH2
1969	cg00993710	0.000245284	0.0819151	0.759439	0.803622	-0.0441831	7	150722703	+	N_Shelf	ATG9B
1876	cg01685739	0.000225655	0.0790958	0.0288319	0.0239048	0.00492718	7	150756773	-	N_Shore	SLC4A2;SLC4A2	high-CpG:150387578-150387738
485	cg02367856	2.57e-05	0.0348363	0.89366	0.923562	-0.0299017	7	150773481	-	OpenSea	SLC4A2
1493	cg12627695	0.000158982	0.0699679	0.134517	0.0846977	0.0498191	7	150865291	+	Island	GBX1
627	cg09380357	3.83e-05	0.0400114	0.578172	0.652746	-0.074574	7	151042072	+	S_Shelf	NUB1
1162	cg25992738	0.00010452	0.0591472	0.650271	0.698627	-0.0483558	7	152589017	+	N_Shelf
2855	cg11263228	0.000431883	0.0994722	0.840898	0.870054	-0.029156	7	155046092	+	OpenSea
968	cg16687344	7.76e-05	0.0526705	0.858427	0.897695	-0.039268	7	155628331	-	OpenSea					TRUE
342	cg24925865	1.49e-05	0.0286569	0.0260724	0.0212487	0.00482367	7	156742601	-	Island	NOM1
403	cg12633766	1.96e-05	0.0319076	0.95807	0.96896	-0.01089	7	157083634	+	OpenSea
195	cg19237063	5.94e-06	0.0199337	0.944714	0.963256	-0.0185423	7	157666168	-	Island	PTPRN2;PTPRN2;PTPRN2
1814	cg26173773	0.00021622	0.0783591	0.718581	0.80706	-0.0884791	7	158075624	+	OpenSea	PTPRN2;PTPRN2;PTPRN2
255	cg08401938	9.75e-06	0.024908	0.852976	0.901232	-0.0482553	7	158155932	-	OpenSea	PTPRN2;PTPRN2;PTPRN2
1654	cg01370437	0.000187187	0.0743365	0.796065	0.846066	-0.0500008	7	158264691	+	OpenSea	PTPRN2;PTPRN2;PTPRN2
560	cg01075347	3.24e-05	0.0379527	0.863728	0.888639	-0.0249112	7	158947376	-	OpenSea
1101	cg14853194	9.6e-05	0.0572647	0.0160917	0.0140053	0.00208645	8	495822	-	Island	TDRP;TDRP			DMR
1237	cg16579144	0.000115591	0.0614464	0.733042	0.803504	-0.0704617	8	852569	-	S_Shelf					TRUE
1265	cg07612991	0.000121422	0.0631122	0.820107	0.844784	-0.0246775	8	1105035	+	N_Shore
1616	cg05283646	0.000180503	0.0734488	0.963719	0.972314	-0.00859463	8	1105957	-	Island
2129	cg11644755	0.000281787	0.0869799	0.83045	0.879318	-0.0488681	8	1307423	+	N_Shore
1524	cg16321109	0.000165205	0.0712819	0.952365	0.957003	-0.00463842	8	1732011	-	N_Shore	CLN8
2716	cg11559989	0.000402177	0.0973707	0.955215	0.961427	-0.00621171	8	1885083	-	OpenSea	ARHGEF10
2008	cg11243826	0.000253124	0.0828918	0.948708	0.957093	-0.00838509	8	2143767	-	OpenSea
1461	cg22016513	0.000154946	0.0696888	0.970897	0.972019	-0.00112244	8	3855577	-	OpenSea	CSMD1
800	cg00291316	5.74e-05	0.0471155	0.79708	0.863769	-0.0666884	8	10469891	+	Island	RP1L1
2243	cg27487839	0.000302002	0.088359	0.0298454	0.0253133	0.00453205	8	11058395	-	Island	XKR6			DMR
1602	cg15301489	0.000178845	0.0733726	0.0213108	0.0179894	0.00332137	8	11058770	+	Island	XKR6
1592	cg15411402	0.000176845	0.073008	0.0156178	0.0123367	0.00328102	8	11142072	-	Island	MTMR9;MTMR9	high-CpG:11179393-11179756
2252	cg20730280	0.000303179	0.088359	0.027064	0.0226443	0.00441972	8	11660568	-	Island	FDFT1;FDFT1;FDFT1;FDFT1;FDFT1;FDFT1;FDFT1;FDFT1;FDFT1
544	cg09050761	3.12e-05	0.0377463	0.819878	0.853591	-0.0337129	8	17272669	+	S_Shore				CDMR
896	cg24370247	6.9e-05	0.050651	0.0528633	0.0371008	0.0157624	8	21646946	-	Island	GFRA2;GFRA2;GFRA2
2177	cg07298985	0.00028994	0.087557	0.684246	0.758281	-0.0740353	8	22133076	-	Island	PIWIL2;PIWIL2
662	cg27004076	4.2e-05	0.0414401	0.0270269	0.0224987	0.00452828	8	22298571	-	Island	PPP3CC	high-CpG:22354414-22354759
421	cg26563553	2.11e-05	0.0328311	0.0658755	0.0397745	0.026101	8	23261731	+	Island	LOXL2			DMR
1455	cg13318091	0.000154124	0.0695873	0.963367	0.975664	-0.012297	8	27145541	-	Island	TRIM35
2665	cg09621945	0.000392522	0.0967949	0.637494	0.697887	-0.0603928	8	28463758	+	OpenSea
2826	cg16431095	0.000425689	0.0989762	0.0505642	0.0430514	0.00751284	8	28747829	+	N_Shore	HMBOX1;INTS9;INTS9;INTS9;INTS9;HMBOX1
877	cg06957003	6.68e-05	0.0499455	0.777555	0.829392	-0.0518371	8	30765641	-	N_Shelf
2646	cg24158595	0.0003873	0.0962497	0.548251	0.575378	-0.0271274	8	32298107	+	OpenSea	NRG1-IT3;NRG1
2359	cg13026596	0.000320331	0.0892229	0.773206	0.810069	-0.0368627	8	35951940	-	OpenSea
1264	cg24283889	0.00012109	0.0629942	0.0408132	0.0306697	0.0101436	8	37593899	+	Island	LOC102723701;ERLIN2;ERLIN2;ERLIN2
1933	cg17999743	0.000239018	0.0813093	0.0235783	0.0176667	0.00591163	8	38239693	+	Island	WHSC1L1;WHSC1L1;WHSC1L1;WHSC1L1	high-CpG:38358495-38358962
379	cg00676030	1.74e-05	0.030108	0.829252	0.883193	-0.0539406	8	38307962	+	OpenSea	FGFR1;FGFR1;FGFR1;FGFR1;FGFR1;FGFR1;FGFR1				TRUE
1287	cg16525461	0.000124452	0.063508	0.0316046	0.0259787	0.00562586	8	38645456	+	Island	TACC1;TACC1;TACC1
1483	cg01545281	0.000158498	0.0699679	0.0793353	0.054055	0.0252803	8	41436034	+	Island	LOC102723729;AGPAT6
2216	cg17331296	0.000296596	0.0879718	0.0451131	0.0279365	0.0171765	8	41754181	-	Island	ANK1;ANK1				TRUE
324	cg13347354	1.32e-05	0.0267939	0.920024	0.949752	-0.029728	8	42269559	+	S_Shore
1379	cg08453814	0.000141744	0.0675522	0.728855	0.784386	-0.0555311	8	42517271	-	OpenSea
1583	cg25437757	0.000175601	0.0728642	0.67972	0.731727	-0.0520067	8	42625222	+	OpenSea	CHRNA6;CHRNA6
385	cg01620486	1.79e-05	0.0306427	0.854208	0.902694	-0.0484858	8	47015640	+	OpenSea
1714	cg18923221	0.000196502	0.075358	0.0199327	0.0159768	0.00395587	8	48650727	+	Island	CEBPD	high-CpG:48812650-48813281
1525	cg23495695	0.000165958	0.0714025	0.0211531	0.0172382	0.00391489	8	48651311	-	Island	CEBPD
1839	cg10524283	0.000220133	0.0786595	0.657267	0.708166	-0.0508987	8	48785417	-	OpenSea	PRKDC;PRKDC
1753	cg11220133	0.000204484	0.0766919	0.0177624	0.0149095	0.00285295	8	48873533	-	Island	MCM4;MCM4;MCM4;MCM4;PRKDC;PRKDC	high-CpG:49035999-49036183
2478	cg24617612	0.000345804	0.0917635	0.815436	0.826613	-0.0111769	8	49043544	-	Island
1073	cg19647755	9.15e-05	0.056045	0.0249967	0.0210584	0.00393829	8	49293379	-	Island					TRUE
1801	cg17496421	0.00021474	0.0783541	0.74871	0.792269	-0.0435587	8	49595535	+	OpenSea
2012	cg24522339	0.000254988	0.0833361	0.826332	0.863649	-0.0373166	8	51576109	+	OpenSea	SNTG1				TRUE
1549	cg01211165	0.000168567	0.0715588	0.740018	0.800979	-0.0609612	8	53011019	+	OpenSea		low-CpG:53173569-53173573
2485	cg01774419	0.000348343	0.0921316	0.0329571	0.0245736	0.00838353	8	59572039	+	Island	NSMAF;NSMAF	high-CpG:59734305-59735114
1888	cg24607409	0.000229249	0.0797683	0.667908	0.729431	-0.0615227	8	60506468	+	OpenSea
1676	cg21207061	0.000190587	0.074708	0.593028	0.530567	0.0624609	8	60543135	+	OpenSea
80	cg00402311	1.14e-06	0.00937433	0.594908	0.697838	-0.102929	8	62282815	+	OpenSea	CLVS1
1958	cg08855288	0.000243341	0.0817114	0.0323841	0.0227916	0.00959243	8	63161589	-	Island	NKAIN3;NKAIN3				TRUE
870	cg00021237	6.62e-05	0.0499208	0.101919	0.0716195	0.0302991	8	67525849	+	Island	MYBL1;MYBL1
2474	cg05052501	0.000345199	0.0917511	0.722667	0.791519	-0.0688527	8	69240774	-	N_Shelf
2624	cg02064674	0.000381019	0.0954826	0.86279	0.890516	-0.0277256	8	70690124	-	OpenSea	SLCO5A1;SLCO5A1;SLCO5A1
2463	cg06190032	0.000343729	0.0916811	0.0336885	0.0269425	0.00674598	8	70745559	-	Island	SLCO5A1;SLCO5A1;SLCO5A1;SLCO5A1
2269	cg16516670	0.00030517	0.088359	0.729974	0.797944	-0.0679693	8	71382800	+	OpenSea	LOC101926892
1165	cg09378940	0.000105192	0.0591738	0.0367232	0.033773	0.0029502	8	71581306	-	Island	LACTB2;XKR9
1357	cg05398773	0.000137663	0.0666419	0.0504069	0.0345348	0.0158721	8	71581521	-	Island	XKR9;LACTB2
545	cg13280195	3.14e-05	0.0378323	0.626141	0.735186	-0.109045	8	74229083	+	OpenSea	RDH10;RDH10-AS1
1404	cg05514223	0.000145104	0.0679465	0.0136602	0.0121217	0.00153854	8	76320106	-	Island		high-CpG:76482370-76482702
867	cg08232264	6.6e-05	0.0499208	0.0222478	0.0188945	0.00335332	8	79578116	+	Island	FAM164A
1150	cg03319894	0.000102537	0.0586307	0.621874	0.70845	-0.0865761	8	81402617	+	S_Shelf	ZBTB10;ZBTB10
781	cg12168112	5.51e-05	0.0461814	0.953637	0.959868	-0.00623046	8	83353898	+	OpenSea
157	cg21182416	4.3e-06	0.0175502	0.972822	0.978001	-0.00517862	8	86065151	+	OpenSea
2169	cg10184889	0.000288535	0.0874195	0.0442293	0.0325157	0.0117136	8	86350919	+	Island	CA3
265	cg13153865	1.01e-05	0.0250081	0.0389733	0.0488315	-0.00985822	8	90914101	+	N_Shore	OSGIN2;OSGIN2;OSGIN2
1671	cg13588425	0.000190159	0.074708	0.794165	0.848041	-0.0538762	8	93483527	+	OpenSea
1604	cg08100421	0.000178998	0.0733813	0.79981	0.843875	-0.0440644	8	94435340	-	OpenSea					TRUE
227	cg00678712	7.6e-06	0.0219476	0.01097	0.00973522	0.00123475	8	94712808	+	Island	LINC00535;FAM92A1;FAM92A1;FAM92A1;FAM92A1;FAM92A1;FAM92A1	high-CpG:94781649-94782051
21	cg00991861	1.59e-07	0.0048394	0.659317	0.757807	-0.0984897	8	95716654	-	OpenSea	ESRP1;ESRP1;ESRP1;ESRP1;ESRP1
1607	cg01459673	0.000179566	0.0734098	0.0187778	0.0163642	0.00241358	8	95907442	+	Island	CCNE2;CCNE2
29	cg18100079	3.07e-07	0.00670651	0.700594	0.767761	-0.0671668	8	98640309	+	S_Shelf
333	cg24470929	1.4e-05	0.027566	0.614946	0.680512	-0.065566	8	98791446	-	S_Shelf	LAPTM4B
1057	cg08706670	8.98e-05	0.0557309	0.029263	0.0220623	0.00720068	8	99439119	-	Island	KCNS2				TRUE
2870	cg11044099	0.000436314	0.0999673	0.0239077	0.0199693	0.00393836	8	102092965	+	Island			chr8:102092753-102092753		TRUE
2380	cg02466711	0.000323819	0.0894679	0.0133822	0.0113835	0.00199867	8	102218365	+	Island	ZNF706;ZNF706;ZNF706
1006	cg18108022	8.13e-05	0.0531738	0.0233608	0.0131	0.0102607	8	103666233	-	Island	KLF10;KLF10
2459	cg16172099	0.000341557	0.0913367	0.137371	0.147416	-0.0100452	8	103750821	-	N_Shore
1229	cg26551688	0.000114374	0.0611953	0.0171491	0.0145135	0.00263559	8	103822898	+	Island
184	cg18221711	5.53e-06	0.019765	0.893389	0.915068	-0.0216782	8	103963195	+	OpenSea	AZIN1-AS1;AZIN1-AS1
1376	cg20800509	0.000141168	0.0674622	0.0288329	0.0245836	0.00424927	8	104513083	+	Island	RIMS2;RIMS2			DMR
2495	cg02362467	0.000349967	0.0921536	0.0231654	0.0205927	0.00257265	8	104513683	-	Island	RIMS2			DMR
641	cg26785025	3.93e-05	0.0403015	0.962961	0.970347	-0.00738647	8	106399822	-	OpenSea	ZFPM2
1711	cg09443479	0.000195734	0.075224	0.696808	0.567481	0.129328	8	108511174	+	OpenSea	ANGPT1
371	cg03012289	1.66e-05	0.0293849	0.780611	0.83091	-0.0502991	8	110374374	-	N_Shore	PKHD1L1				TRUE
1375	cg13647447	0.00014092	0.0673922	0.846737	0.87955	-0.0328124	8	120981162	-	OpenSea	DEPTOR;DEPTOR
774	cg19778650	5.45e-05	0.0461814	0.903863	0.918293	-0.0144293	8	124441717	+	OpenSea	WDYHV1;WDYHV1;WDYHV1
138	cg26653326	3.28e-06	0.0156235	0.491511	0.619821	-0.12831	8	124742606	+	OpenSea	ANXA13;ANXA13
1921	cg14830033	0.000235782	0.0806608	0.850995	0.872144	-0.0211489	8	125319777	-	OpenSea
1997	cg23542858	0.000250924	0.082624	0.013554	0.0119852	0.00156885	8	125486752	-	Island	RNF139	high-CpG:125555933-125556035
1907	cg08594696	0.000232537	0.080183	0.831098	0.842021	-0.0109223	8	125491085	+	S_Shelf	RNF139
960	cg12108029	7.62e-05	0.0522242	0.0295295	0.0211657	0.00836374	8	126010861	+	Island	SQLE;SQLE	high-CpG:126079900-126080217
648	cg27495636	4e-05	0.0405989	0.77374	0.660219	0.113521	8	128427572	+	OpenSea	POU5F1B
2872	cg14732699	0.000436872	0.0999968	0.0439389	0.0330792	0.0108597	8	128750039	-	Island	MYC
2842	cg11498487	0.000428552	0.0991563	0.752411	0.785554	-0.033143	8	131309621	-	OpenSea	ASAP1IT1;ASAP1
394	cg27071072	1.93e-05	0.0319076	0.0163043	0.0130546	0.00324978	8	131456011	+	Island	ASAP1;ASAP1	high-CpG:131525015-131525501		DMR
2419	cg17365845	0.000334115	0.090805	0.0225981	0.0177485	0.00484965	8	134309737	-	Island	NDRG1;NDRG1
1305	cg02503970	0.000127414	0.064202	0.0278499	0.02266	0.00518986	8	134584145	-	Island	ST3GAL1;ST3GAL1;ST3GAL1;ST3GAL1	high-CpG:134653279-134653530
569	cg22012693	3.29e-05	0.0380587	0.544724	0.633392	-0.088668	8	139919163	+	OpenSea	COL22A1
2468	cg16295231	0.000344164	0.0916811	0.876196	0.886521	-0.0103248	8	140710112	-	OpenSea	KCNK9;KCNK9
2342	cg23681110	0.000317374	0.0891098	0.863667	0.89169	-0.0280222	8	140847721	+	OpenSea	TRAPPC9;TRAPPC9
563	cg16798694	3.25e-05	0.0379527	0.979362	0.983104	-0.00374157	8	141557712	+	N_Shore	EIF2C2;EIF2C2
1918	cg17161202	0.000235286	0.080626	0.604173	0.65642	-0.0522475	8	141903388	-	OpenSea	PTK2;PTK2;PTK2
2294	cg25225379	0.000309739	0.0887859	0.740324	0.835605	-0.0952811	8	143509263	+	N_Shore
915	cg10895433	7.12e-05	0.0511482	0.78043	0.830789	-0.0503589	8	143821739	+	S_Shore
2449	cg21251926	0.000339544	0.0911152	0.928403	0.94592	-0.0175178	8	143916206	-	Island	GML
1371	cg21551210	0.000140025	0.0671473	0.799503	0.839439	-0.0399353	8	144333162	+	S_Shore	ZFP41;ZFP41
2409	cg20128188	0.000331479	0.0904817	0.975435	0.980601	-0.00516608	8	144386912	-	N_Shelf
2823	cg01869229	0.000424794	0.0989485	0.0863336	0.0743852	0.0119484	8	144417236	+	S_Shore	TOP1MT				TRUE
334	cg13191508	1.4e-05	0.0276128	0.954875	0.966993	-0.012118	8	144600686	+	N_Shore	ZC3H3
849	cg14491479	6.44e-05	0.0497386	0.0352289	0.0267884	0.00844048	8	144623711	-	Island	ZC3H3
413	cg13234188	2.06e-05	0.0327462	0.0211773	0.0163433	0.00483401	8	144679717	+	Island	EEF1D;EEF1D;TIGD5;EEF1D;EEF1D;EEF1D;EEF1D;EEF1D;EEF1D;EEF1D;EEF1D;EEF1D;EEF1D;EEF1D;EEF1D;EEF1D
1037	cg14824382	8.64e-05	0.0547469	0.0687447	0.0432697	0.0254751	8	144680115	+	Island	EEF1D;EEF1D;TIGD5;EEF1D;EEF1D;EEF1D;EEF1D;EEF1D
1131	cg20108204	9.96e-05	0.0579147	0.945112	0.964187	-0.0190746	8	144681846	-	Island	TIGD5				TRUE
1514	cg05876325	0.000161865	0.0702827	0.0196462	0.0166686	0.00297767	8	144699783	-	Island	TSTA3
1468	cg20036996	0.000155854	0.0698124	0.868112	0.906141	-0.0380292	8	144906376	+	OpenSea	PUF60;PUF60;PUF60				TRUE
2836	cg08242000	0.000427474	0.0990808	0.0233902	0.0194635	0.00392666	8	144922888	+	Island	NRBP2
1361	cg07172676	0.000138091	0.0666419	0.853974	0.902853	-0.048879	8	144997714	+	Island	PLEC1;PLEC1;PLEC1;PLEC1;PLEC1;PLEC1;PLEC1;PLEC1
1793	cg10319399	0.000212565	0.0779476	0.0391592	0.0282406	0.0109185	8	145018285	+	Island	PLEC1;PLEC1;PLEC1;PLEC1;PLEC1;PLEC1	high-CpG:145090082-145090317			TRUE
1612	cg10137990	0.000180054	0.0734098	0.0346401	0.0275048	0.00713528	8	145137203	+	Island	GPAA1
598	cg11547878	3.52e-05	0.0386063	0.035885	0.0269198	0.00896512	8	145138225	-	Island	GPAA1
1271	cg14964403	0.000122267	0.0632175	0.0440386	0.0314864	0.0125522	8	145149739	-	Island	CYC1
578	cg24806294	3.36e-05	0.038221	0.950892	0.962215	-0.0113225	8	145554322	-	N_Shore
1173	cg12390358	0.000106011	0.0591738	0.0231011	0.0183205	0.00478065	8	145597459	+	Island	ADCK5
2772	cg17161921	0.000415471	0.0983804	0.961658	0.9678	-0.00614284	8	145665910	+	N_Shore	NFKBIL2
1836	cg01906600	0.00021975	0.0786595	0.035721	0.0283579	0.00736301	8	145703049	+	Island	FOXH1
713	cg16848524	4.71e-05	0.0434389	0.0323652	0.027742	0.00462314	8	145806273	+	Island	KIAA1688
2044	cg27034985	0.000261828	0.0841967	0.0243582	0.0199189	0.00443925	8	146012877	-	Island	ZNF34;ZNF34;ZNF34
2302	cg09208919	0.000311986	0.0891098	0.696057	0.748311	-0.0522539	9	326599	-	OpenSea	DOCK8;DOCK8;DOCK8
341	cg14002772	1.49e-05	0.0286569	0.934433	0.961506	-0.027073	9	2047373	+	Island	SMARCA2;SMARCA2
1151	cg11864890	0.000102678	0.0586319	0.0175494	0.0146424	0.00290699	9	4793070	+	Island	RCL1;RCL1;RCL1;RCL1;RCL1;RCL1	high-CpG:4782833-4783093
292	cg09938027	1.14e-05	0.0254933	0.867111	0.895799	-0.028688	9	5429416	+	OpenSea	PLGRKT
119	cg14082959	2.52e-06	0.0139021	0.807291	0.876201	-0.0689097	9	11618283	+	Island
919	cg19233179	7.17e-05	0.0512108	0.0151378	0.0128943	0.00224346	9	22009470	-	Island	CDKN2B;CDKN2B;CDKN2B-AS1;CDKN2B-AS1;CDKN2B-AS1;CDKN2B-AS1;CDKN2B-AS1;CDKN2B-AS1;CDKN2B-AS1;CDKN2B-AS1;CDKN2B-AS1;CDKN2B-AS1;CDKN2B-AS1;CDKN2B-AS1;CDKN2B-AS1;CDKN2B-AS1
2472	cg13598152	0.000344657	0.0916811	0.0323548	0.0246916	0.00766322	9	29213880	+	N_Shore				DMR
1679	cg14050247	0.000190837	0.074708	0.758977	0.824488	-0.0655115	9	32756001	+	OpenSea
1097	cg08298766	9.51e-05	0.0570276	0.755155	0.813776	-0.058621	9	33353967	+	OpenSea	NFX1;NFX1				TRUE
912	cg19599647	7.09e-05	0.0510973	0.6618	0.698537	-0.0367369	9	33752790	-	S_Shore	PRSS3;PRSS3;PRSS3
985	cg14531310	7.9e-05	0.0527003	0.845107	0.897726	-0.0526192	9	34401237	+	S_Shore	C9orf25
1878	cg04273556	0.000226422	0.0792803	0.0415139	0.0372078	0.00430615	9	35096672	+	Island	PIGO;PIGO
1687	cg23528353	0.000191978	0.074708	0.106085	0.0761664	0.0299188	9	35605358	+	Island	TESK1;TESK1	high-CpG:35595231-35595809
1040	cg21182103	8.66e-05	0.0547655	0.535446	0.586414	-0.0509678	9	37798519	+	N_Shelf
1924	cg13889795	0.000236267	0.0807494	0.472832	0.526085	-0.0532527	9	45726443	+	OpenSea	FAM27A
1499	cg08635139	0.000160124	0.0701776	0.732594	0.822005	-0.089411	9	71943947	-	S_Shelf	FAM189A2;FAM189A2
1370	cg07972220	0.000139236	0.0668299	0.559287	0.487242	0.0720452	9	79332518	-	OpenSea	PRUNE2;PRUNE2;PRUNE2;PRUNE2
1116	cg21826292	9.73e-05	0.0573527	0.0235166	0.0193843	0.00413236	9	80850930	-	Island	CEP78;CEP78	high-CpG:80040734-80040783
1114	cg22839188	9.71e-05	0.0572969	0.726352	0.785015	-0.0586628	9	83454775	-	OpenSea
2706	cg12927772	0.000400613	0.0973312	0.0602204	0.0543342	0.00588614	9	86571585	-	Island	C9orf64;C9orf64				TRUE
2318	cg13024416	0.000314656	0.0891098	0.018605	0.0152276	0.00337745	9	88356898	+	Island	AGTPBP1;AGTPBP1;AGTPBP1;AGTPBP1;AGTPBP1;AGTPBP1	high-CpG:87546633-87546733
2427	cg14375531	0.000335359	0.0908617	0.0416699	0.0327992	0.00887067	9	89763432	-	Island	C9orf170			DMR	TRUE
63	cg04694477	7.27e-07	0.00752611	0.0420543	0.0303706	0.0116836	9	91606450	-	Island	C9orf47;C9orf47;S1PR3;S1PR3			DMR
2295	cg19177732	0.00031048	0.0889123	0.0179187	0.0154741	0.00244467	9	91925994	-	Island	MIR3153;CKS2
881	cg00868299	6.71e-05	0.0499455	0.827714	0.853686	-0.0259713	9	92306213	-	OpenSea	UNQ6494
739	cg13896861	5.13e-05	0.0456174	0.724798	0.772657	-0.0478591	9	94878241	+	S_Shore	SPTLC1;SPTLC1
231	cg05075963	7.95e-06	0.0226223	0.835428	0.877832	-0.0424039	9	96530326	-	OpenSea
1931	cg00722015	0.000238915	0.0813093	0.0207635	0.014069	0.00669449	9	96793401	+	Island	PTPDC1;PTPDC1;PTPDC1;PTPDC1
1605	cg00686780	0.000179168	0.0734052	0.0231929	0.0169772	0.00621571	9	98784217	+	Island	LINC00092			DMR
1238	cg27325395	0.000115834	0.0615255	0.815967	0.857653	-0.041686	9	99089615	-	OpenSea	SLC35D2;SLC35D2;SLC35D2
1551	cg03486287	0.000169172	0.0717213	0.0133124	0.0106681	0.00264422	9	99145998	+	S_Shore	SLC35D2;SLC35D2;SLC35D2	high-CpG:98185697-98185870
2391	cg22794860	0.000326378	0.0897599	0.0117774	0.0102087	0.00156872	9	99212339	-	Island	HABP4
1402	cg14416047	0.000144954	0.0679465	0.0459486	0.0364317	0.0095169	9	99329563	-	Island	CDC14B;CDC14B;CDC14B
2500	cg18117502	0.000350379	0.0921536	0.0300021	0.0248135	0.00518851	9	100395756	-	Island	TSTD2;TSTD2;NCBP1;NCBP1
405	cg03470837	1.97e-05	0.0319076	0.618137	0.664281	-0.0461438	9	101251353	-	OpenSea	GABBR2
2134	cg14569576	0.000282541	0.0869799	0.0272608	0.0226585	0.00460229	9	102585669	+	Island	NR4A3;NR4A3;NR4A3
2869	cg15204419	0.000435888	0.0999047	0.0254516	0.0198613	0.00559029	9	102861339	+	Island	INVS;INVS;INVS;ERP44	high-CpG:101901022-101901427
688	cg21493133	4.48e-05	0.0427519	0.0218834	0.0180822	0.00380123	9	102861349	+	Island	INVS;INVS;INVS;ERP44	high-CpG:101901022-101901427
2206	cg21523083	0.000295008	0.087922	0.020009	0.0166097	0.00339926	9	110045389	+	Island	RAD23B;RAD23B
1967	cg11512305	0.000245245	0.0819151	0.0284148	0.0232961	0.00511867	9	115095150	+	Island	PTBP3;PTBP3;MIR3134;PTBP3;PTBP3;PTBP3;PTBP3;PTBP3	high-CpG:114134942-114135978
2794	cg22751438	0.000418783	0.0984813	0.600977	0.659085	-0.0581077	9	115333218	+	OpenSea	KIAA1958;KIAA1958;KIAA1958
79	cg13821031	1.12e-06	0.00931098	0.763613	0.84447	-0.0808571	9	116035939	+	N_Shore	CDC26
1346	cg13985868	0.000134866	0.0657991	0.0468745	0.0346648	0.0122097	9	116102304	+	N_Shore	WDR31;WDR31
209	cg13783957	6.7e-06	0.0210926	0.598518	0.503145	0.0953728	9	116837795	+	OpenSea	AMBP
1112	cg02986878	9.71e-05	0.0572969	0.726252	0.781392	-0.05514	9	117275370	-	OpenSea
2278	cg13649036	0.000306127	0.0883667	0.754698	0.786318	-0.03162	9	123524355	-	OpenSea	FBXW2
642	cg11162741	3.96e-05	0.0404682	0.72573	0.788919	-0.0631887	9	123690455	+	N_Shore	TRAF1;TRAF1			CDMR
1864	cg13591497	0.000223567	0.0788685	0.868436	0.917488	-0.0490516	9	126129566	+	Island	CRB2				TRUE
1835	cg11014186	0.000219668	0.0786595	0.0145224	0.0120347	0.00248767	9	127703541	+	Island	GOLGA1
751	cg18781187	5.24e-05	0.0459021	0.018105	0.0146219	0.00348309	9	128510438	+	Island	PBX3;PBX3;PBX3;PBX3
2773	cg12738627	0.000415473	0.0983804	0.766218	0.819996	-0.0537771	9	128574324	+	OpenSea	PBX3;PBX3;PBX3;PBX3
1517	cg14355899	0.00016304	0.070648	0.0278539	0.0210847	0.00676918	9	129375993	-	Island	LMX1B
2385	cg17385208	0.000325904	0.0897599	0.0284458	0.0232761	0.00516968	9	129885104	+	OpenSea	ANGPTL2;RALGPS1;RALGPS1;RALGPS1;RALGPS1
1433	cg27343747	0.000149031	0.0683869	0.141848	0.100282	0.0415663	9	130548282	-	Island	CDK9;MIR2861	high-CpG:129587298-129588574;high-CpG:129588022-129588496
71	cg05363908	9.01e-07	0.00834826	0.955128	0.970056	-0.0149284	9	130649087	-	N_Shelf	ST6GALNAC6;ST6GALNAC6;ST6GALNAC6;ST6GALNAC6;ST6GALNAC6;ST6GALNAC6;ST6GALNAC6
1408	cg14204415	0.000145709	0.0680186	0.0269857	0.0201319	0.00685382	9	131464988	-	Island	PKN3;PKN3	high-CpG:130504591-130505476
1543	cg03045021	0.000167607	0.0714025	0.0491711	0.0352963	0.0138748	9	131644678	+	Island	LRRC8A;LRRC8A;LRRC8A;CCBL1;CCBL1;CCBL1;CCBL1;CCBL1
2871	cg00934791	0.000436488	0.0999724	0.0318745	0.024689	0.00718551	9	131790474	+	S_Shore	SH3GLB2;SH3GLB2;SH3GLB2;SH3GLB2;SH3GLB2;SH3GLB2	high-CpG:130830276-130830451
1058	cg13507888	8.98e-05	0.0557309	0.0415883	0.0323226	0.00926572	9	132199983	-	Island					TRUE
1362	cg05508099	0.000138326	0.0666419	0.684611	0.72084	-0.0362284	9	132353957	-	OpenSea
1056	cg01130655	8.96e-05	0.0557309	0.02099	0.0162402	0.00474984	9	132359879	-	Island			chr9:132359774-132359774		TRUE
414	cg13503179	2.06e-05	0.032758	0.758953	0.65705	0.101904	9	132695505	-	OpenSea	FNBP1				TRUE
681	cg13609937	4.4e-05	0.0424111	0.036459	0.0271167	0.00934232	9	133588314	-	Island	ABL1
83	cg23853020	1.21e-06	0.00962479	0.701117	0.742129	-0.0410121	9	134141052	+	OpenSea	FAM78A
78	cg14518098	1.11e-06	0.00931098	0.852582	0.909962	-0.0573801	9	135085065	-	OpenSea	NTNG2
1042	cg11116176	8.7e-05	0.0548202	0.673868	0.747284	-0.0734157	9	135805713	-	OpenSea	TSC1;TSC1;TSC1
768	cg13561918	5.43e-05	0.0461814	0.795754	0.865094	-0.0693398	9	136328561	+	S_Shelf	C9orf7;C9orf7
955	cg21276022	7.54e-05	0.0519087	0.793912	0.850823	-0.0569107	9	136390236	-	OpenSea	TMEM8C
1539	cg14157170	0.000167397	0.0714025	0.837763	0.901062	-0.0632992	9	136747711	+	OpenSea	VAV2;VAV2				TRUE
2492	cg24341498	0.000349311	0.0921536	0.030278	0.025656	0.00462206	9	137217390	+	Island	RXRA
687	cg14099812	4.48e-05	0.0427519	0.96742	0.975406	-0.00798612	9	137807097	+	OpenSea	FCN1
2276	cg01732397	0.00030592	0.0883667	0.0253918	0.0187	0.00669174	9	138392339	-	Island	C9orf116;C9orf116;MRPS2;MRPS2;MRPS2;MRPS2;MRPS2
611	cg21170007	3.64e-05	0.0391142	0.903617	0.925899	-0.0222816	9	138465739	+	OpenSea
474	cg20947088	2.5e-05	0.0346252	0.810974	0.846416	-0.0354421	9	138811046	+	OpenSea
591	cg01430633	3.46e-05	0.0384787	0.032372	0.0255724	0.00679967	9	138987312	-	Island	NACC2
387	cg14180839	1.81e-05	0.030783	0.810187	0.85362	-0.0434326	9	139142049	+	Island
440	cg13491959	2.23e-05	0.0333145	0.953996	0.969544	-0.0155475	9	139292811	-	N_Shore	SNAPC4
2517	cg07874283	0.000353529	0.0922645	0.0231061	0.0189213	0.0041848	9	139334396	+	Island	INPP5E
2130	cg13551229	0.000281939	0.0869799	0.894691	0.924478	-0.0297874	9	139762139	+	S_Shore	EDF1;EDF1
628	cg14447152	3.83e-05	0.0400114	0.744911	0.788508	-0.0435973	9	140153393	-	S_Shelf	COBRA1
420	cg14548038	2.1e-05	0.0328311	0.744995	0.825449	-0.0804546	9	140178418	+	S_Shelf
904	cg15275636	7.04e-05	0.0510953	0.0128954	0.00946735	0.003428	9	140446075	-	Island	MRPL41;PNPLA7;PNPLA7
319	cg06819235	1.29e-05	0.0265051	0.0113493	0.00891912	0.00243017	10	181229	+	Island	ZMYND11;ZMYND11;ZMYND11;ZMYND11;ZMYND11
2847	cg04630908	0.000429996	0.0992983	0.946845	0.949107	-0.00226196	10	321782	+	OpenSea	DIP2C				TRUE
1866	cg25737283	0.000223852	0.0788842	0.933577	0.95618	-0.0226031	10	533479	-	S_Shelf	DIP2C
845	cg10937807	6.37e-05	0.0495448	0.683969	0.762476	-0.0785075	10	682147	+	N_Shelf	DIP2C
491	cg15213732	2.6e-05	0.034882	0.965591	0.973646	-0.00805483	10	860677	-	OpenSea	LARP4B
690	cg08944086	4.5e-05	0.0427519	0.933649	0.944883	-0.0112336	10	1229080	+	N_Shore	ADARB2
2528	cg23248615	0.000355655	0.0925042	0.235966	0.331631	-0.0956649	10	2005709	+	OpenSea
1776	cg05518471	0.000209922	0.0776768	0.6251	0.71846	-0.0933597	10	2006740	-	OpenSea
992	cg02726847	7.98e-05	0.0527569	0.036666	0.0301575	0.0065085	10	3110273	-	Island	PFKP
1191	cg26300802	0.000109058	0.0601829	0.899627	0.92317	-0.0235431	10	4191562	+	OpenSea
2445	cg16388952	0.000338776	0.0910968	0.750229	0.787199	-0.0369701	10	5236551	+	OpenSea
2263	cg27176938	0.000304726	0.088359	0.945577	0.951236	-0.0056591	10	5681092	-	N_Shelf	ASB13;ASB13
251	cg11662609	9.36e-06	0.0245203	0.942784	0.956636	-0.0138519	10	5935006	-	S_Shelf	FBXO18;FBXO18
2341	cg03108606	0.000317361	0.0891098	0.0130559	0.0111108	0.00194514	10	6019772	+	Island	IL15RA;IL15RA;IL15RA;IL15RA;IL15RA;IL15RA
524	cg13319501	2.94e-05	0.036795	0.800442	0.863931	-0.0634894	10	7409695	+	Island	SFMBT2
2377	cg00804291	0.00032317	0.0894012	0.0310789	0.0276864	0.00339242	10	7830258	-	Island	KIN;KIN;ATP5C1;ATP5C1
1853	cg03795316	0.00022198	0.0787734	0.0392861	0.0327354	0.0065507	10	12110955	+	Island	DHTKD1;DHTKD1	high-CpG:12150927-12151053
666	cg01167366	4.22e-05	0.0414401	0.736526	0.800339	-0.0638128	10	12742170	-	OpenSea	CAMK1D;CAMK1D
32	cg06424550	3.35e-07	0.00670651	0.819867	0.889216	-0.0693491	10	12808422	-	OpenSea	CAMK1D;CAMK1D				TRUE
1829	cg06881611	0.000218692	0.0785976	0.909856	0.932394	-0.0225374	10	13342717	-	N_Shore	PHYH;PHYH
2283	cg00520540	0.000307328	0.0884971	0.0309921	0.0269586	0.00403354	10	14880887	-	Island	CDNF;HSPA14	high-CpG:14920891-14920894
1227	cg14487075	0.000114242	0.0611953	0.0783844	0.0652483	0.0131361	10	14921712	-	S_Shore	SUV39H2
1897	cg11248957	0.000230283	0.0798243	0.886261	0.914786	-0.0285253	10	15963599	+	OpenSea
343	cg17897505	1.5e-05	0.0287161	0.70151	0.76155	-0.0600394	10	17244376	+	S_Shore	TRDMT1
2568	cg01026803	0.000370067	0.0946956	0.608723	0.656591	-0.0478677	10	18299822	+	OpenSea	SLC39A12;SLC39A12;SLC39A12;SLC39A12;SLC39A12-AS1
1456	cg16747247	0.000154138	0.0695873	0.0124267	0.011121	0.0013057	10	20104806	-	Island	PLXDC2
1289	cg19730523	0.000124734	0.063508	0.652604	0.727306	-0.0747022	10	21553815	-	OpenSea
965	cg20710049	7.72e-05	0.0525997	0.72822	0.801991	-0.0737711	10	22875490	-	OpenSea	PIP4K2A
1669	cg05226279	0.000189516	0.0746675	0.703706	0.608084	0.0956226	10	23539747	-	OpenSea
2181	cg09882128	0.000290406	0.087557	0.0109674	0.00933883	0.00162857	10	23727984	-	Island	OTUD1	high-CpG:23767874-23768729
2061	cg04180868	0.000265849	0.0847885	0.0219795	0.0169248	0.00505472	10	25241462	+	Island	PRTFDC1				TRUE
2548	cg14224350	0.000363114	0.093618	0.524903	0.471401	0.0535022	10	26508450	+	S_Shore	GAD2;GAD2
2344	cg26743529	0.000318069	0.089179	0.619069	0.678337	-0.0592681	10	29134817	-	OpenSea	C10orf126
404	cg17096262	1.96e-05	0.0319076	0.930195	0.952011	-0.0218157	10	29759227	+	OpenSea	SVIL;SVIL
1867	cg09639837	0.000223977	0.0788861	0.0247157	0.0200038	0.00471191	10	30722502	+	Island	MAP3K8
149	cg02270053	3.99e-06	0.0175357	0.756803	0.822226	-0.0654238	10	30735101	+	OpenSea	MAP3K8				TRUE
889	cg14870636	6.81e-05	0.0503645	0.749954	0.814192	-0.0642381	10	32199021	+	OpenSea	ARHGAP12;ARHGAP12;ARHGAP12;ARHGAP12;ARHGAP12;ARHGAP12
1395	cg13779055	0.000143363	0.0675777	0.0294401	0.0217749	0.00766516	10	33623762	-	Island	NRP1;NRP1;NRP1;NRP1;NRP1;NRP1;NRP1;NRP1;NRP1;NRP1;NRP1	high-CpG:33663305-33664618
1589	cg09080721	0.000176482	0.072983	0.650511	0.686437	-0.0359261	10	35361575	+	OpenSea	CUL2;CUL2;CUL2;CUL2
1530	cg09937316	0.000166644	0.0714025	0.023863	0.0185705	0.00529249	10	35416239	-	Island	CREM;CREM;CREM;CREM;CREM;CREM
307	cg16003829	1.23e-05	0.0260124	0.0350146	0.024529	0.0104856	10	35416245	-	Island	CREM;CREM;CREM;CREM;CREM;CREM
1899	cg20363081	0.000230747	0.0798526	0.856453	0.863134	-0.00668159	10	36869562	+	OpenSea
224	cg18654954	7.36e-06	0.0215959	0.808859	0.848906	-0.0400471	10	38348493	+	OpenSea	ZNF33A;ZNF33A
2444	cg09823154	0.000338762	0.0910968	0.155735	0.122815	0.0329208	10	43332737	+	Island
287	cg21393846	1.11e-05	0.0254933	0.0124637	0.0106125	0.00185116	10	43601095	+	Island	RET;RET		chr10:43600895-43600895		TRUE
2327	cg27348090	0.000315932	0.0891098	0.0202854	0.0174995	0.00278596	10	43633757	+	Island	CSGALNACT2
1855	cg25771649	0.000222376	0.0787757	0.0409919	0.0287355	0.0122564	10	43725277	-	Island	RASGEF1A			DMR
1770	cg05650494	0.00020842	0.0774297	0.0230299	0.0193804	0.00364949	10	43904658	-	Island	HNRNPF;HNRNPF;HNRNPF;HNRNPF;HNRNPF	high-CpG:43224273-43224665
1209	cg25798771	0.000111775	0.0607835	0.0185726	0.0156274	0.00294525	10	44102035	-	Island	ZNF485
1342	cg19487745	0.000134061	0.0656888	0.808455	0.83462	-0.0261647	10	45567697	+	OpenSea
33	cg12216772	3.46e-07	0.00670651	0.774151	0.83073	-0.0565785	10	46164062	-	N_Shelf	ANUBL1;ANUBL1
872	cg07162498	6.63e-05	0.0499208	0.950789	0.964355	-0.0135661	10	47900640	-	OpenSea	FAM21B
19	cg00033396	1.54e-07	0.0048394	0.823732	0.887753	-0.0640216	10	48208808	+	OpenSea
2476	cg19101988	0.000345628	0.0917635	0.880274	0.917684	-0.03741	10	48208812	+	OpenSea
843	cg11576834	6.35e-05	0.0495407	0.0687648	0.0433912	0.0253736	10	50970258	-	Island	OGDHL;OGDHL;OGDHL	high-CpG:50640196-50640404
811	cg15826089	5.87e-05	0.0475472	0.690269	0.597044	0.0932246	10	52008504	+	OpenSea	ASAH2;ASAH2
1338	cg16404899	0.000133345	0.0655087	0.860734	0.886208	-0.0254739	10	60758165	-	OpenSea	LINC00844
984	cg00132616	7.88e-05	0.0526705	0.0277213	0.0243164	0.00340489	10	63663140	+	Island	ARID5B				TRUE
1512	cg27430682	0.000161743	0.0702827	0.0242165	0.0178633	0.00635319	10	65225552	-	Island	JMJD1C;JMJD1C;LOC84989	high-CpG:64895344-64895796
2160	cg10300729	0.000287047	0.0872939	0.654087	0.728856	-0.0747691	10	65284527	+	S_Shelf	REEP3
2133	cg12334937	0.000282444	0.0869799	0.786459	0.852719	-0.0662607	10	69543441	-	OpenSea
1282	cg03201337	0.000123533	0.0633276	0.64271	0.770561	-0.127851	10	69609995	-	S_Shore
2639	cg10388306	0.000386179	0.0962062	0.71461	0.755883	-0.0412728	10	69972916	-	OpenSea
2210	cg11163433	0.000295688	0.0879714	0.685406	0.76153	-0.0761242	10	70232471	-	S_Shore	DNA2
1381	cg12119218	0.000141947	0.0675522	0.0220542	0.017983	0.00407126	10	70287206	-	Island	SLC25A16;SLC25A16	high-CpG:69957157-69957295
842	cg23345864	6.34e-05	0.0494944	0.0226583	0.020222	0.00243627	10	70883530	+	N_Shore	VPS26A;VPS26A
2314	cg06506461	0.000314073	0.0891098	0.843367	0.87345	-0.0300837	10	71112319	+	OpenSea	HK1;HK1;HK1;HK1;HK1
2776	cg07647353	0.000415611	0.0983804	0.0160736	0.0137817	0.00229192	10	71333186	-	Island	NEUROG3
1802	cg25084101	0.000214806	0.0783541	0.0391892	0.0287834	0.0104058	10	71336562	-	N_Shore
1195	cg16018152	0.000109916	0.0604203	0.0109755	0.00969038	0.00128513	10	71930517	+	Island	SAR1A;SAR1A
1007	cg01125366	8.17e-05	0.0532936	0.0323384	0.0265455	0.00579293	10	72218306	-	Island					TRUE
878	cg25798987	6.69e-05	0.0499455	0.0303066	0.0220951	0.00821146	10	73157222	+	Island	CDH23;CDH23			DMR	TRUE
1548	cg12568633	0.00016816	0.0714319	0.0270153	0.0208034	0.00621186	10	73533407	-	Island	CDH23;C10orf54	high-CpG:73203244-73203681
1002	cg00502002	8.07e-05	0.0529612	0.741091	0.80493	-0.0638396	10	73976970	-	S_Shore	ANAPC16;ANAPC16;ANAPC16;ANAPC16;ASCC1;ASCC1;ASCC1;ASCC1;ANAPC16;ANAPC16
1233	cg11469325	0.000115285	0.0614129	0.0450904	0.031857	0.0132334	10	75012359	-	Island	MRPS16;MRPS16	high-CpG:74682326-74682460
2567	cg23016347	0.000369658	0.0946926	0.670237	0.719479	-0.0492421	10	75170966	+	N_Shelf	ANXA7;ANXA7
1986	cg26771998	0.000248526	0.0822409	0.142143	0.120035	0.0221083	10	75490334	+	Island	BMS1P4	high-CpG:75160314-75160400
1353	cg00372669	0.000136807	0.0664894	0.0378865	0.0311941	0.00669239	10	75571033	-	Island	NDST2
2857	cg04749074	0.000432581	0.0995632	0.0122801	0.0101265	0.0021536	10	75671296	+	Island	C10orf55;PLAU;PLAU;PLAU;PLAU
631	cg00995584	3.85e-05	0.0401262	0.0166916	0.0141119	0.00257973	10	75757877	+	Island	VCL;VCL;VCL;VCL	high-CpG:75427833-75427897
620	cg24671245	3.71e-05	0.039321	0.0810236	0.065257	0.0157666	10	76585406	-	Island	MYST4
2333	cg11906176	0.000316446	0.0891098	0.0173604	0.0148182	0.00254219	10	76970489	-	Island	VDAC2
2266	cg15437133	0.000304822	0.088359	0.0257256	0.018326	0.0073996	10	77160907	+	Island	ZNF503;C10orf41
165	cg05445097	4.49e-06	0.0179086	0.688008	0.783354	-0.0953458	10	79627932	+	OpenSea	DLG5				TRUE
480	cg16720687	2.55e-05	0.0348363	0.0287898	0.0204681	0.00832169	10	79686437	-	Island	LOC100128292;DLG5
2535	cg12144272	0.000358012	0.0928668	0.0419196	0.0312318	0.0106878	10	80828357	-	Island	ZMIZ1;LOC283050;LOC283050;LOC283050
2822	cg04428701	0.000424649	0.0989485	0.0410532	0.0354591	0.00559409	10	81892639	-	Island	PLAC9			DMR
1176	cg15339994	0.000106196	0.0591738	0.930214	0.938942	-0.00872827	10	82303217	+	OpenSea	SH2D4B;SH2D4B
2868	cg01099580	0.000435448	0.0998385	0.020405	0.0171866	0.00321835	10	89264946	+	Island	MINPP1
1877	cg27299538	0.000225844	0.0791197	0.023085	0.0198376	0.00324746	10	89622531	-	Island	PTEN;KILLIN;KILLIN
146	cg21250048	3.65e-06	0.0164201	0.608909	0.704992	-0.0960826	10	89667551	-	OpenSea	PTEN;PTEN;PTEN
1940	cg05810476	0.000240225	0.081382	0.515453	0.556321	-0.0408682	10	89872861	-	OpenSea
98	cg27002303	1.76e-06	0.011823	0.625402	0.507592	0.11781	10	93335196	-	OpenSea	LOC100188947
172	cg16850511	4.75e-06	0.0181625	0.0300221	0.023673	0.00634913	10	94050907	+	Island	CPEB3;MARCH5	high-CpG:94040838-94041123
2272	cg06506078	0.000305403	0.088359	0.0290979	0.0220305	0.00706745	10	94608258	+	Island	EXOC6;EXOC6;EXOC6	high-CpG:94598230-94598440
2108	cg19190632	0.000277397	0.0865127	0.59093	0.654345	-0.0634151	10	97022649	-	OpenSea	PDLIM1				TRUE
507	cg13196826	2.76e-05	0.0357628	0.0142248	0.00894285	0.00528199	10	98945664	-	Island	SLIT1;SLIT1	high-CpG:98935547-98935825		DMR
1482	cg10066305	0.000158081	0.0699679	0.0201151	0.0164696	0.00364545	10	99447085	+	Island	AVPI1
1778	cg24224884	0.000210141	0.0776768	0.0282358	0.0199763	0.00825949	10	99447166	-	Island	AVPI1
602	cg14233354	3.55e-05	0.0387783	0.0939948	0.066799	0.0271958	10	99790761	-	Island	CRTAC1
174	cg00941856	4.84e-06	0.0182894	0.673053	0.745648	-0.0725944	10	101674581	-	OpenSea	DNMBP
282	cg11415495	1.08e-05	0.025161	0.779337	0.719737	0.0595998	10	101723799	+	OpenSea	DNMBP
2778	cg25545507	0.000415775	0.0983804	0.602139	0.721372	-0.119233	10	102090310	-	OpenSea	PKD2L1;PKD2L1
706	cg11545863	4.67e-05	0.0434389	0.886475	0.912418	-0.0259424	10	102487168	+	N_Shelf
211	cg15448683	6.94e-06	0.0214411	0.722649	0.58489	0.137759	10	102671221	-	N_Shore	FAM178A;FAM178A;FAM178A
2841	cg03758181	0.000428074	0.0990808	0.0368379	0.0327434	0.00409449	10	102989325	+	Island	FLJ41350;LBX1			DMR
1206	cg08764167	0.000111278	0.0606743	0.0119819	0.0111601	0.000821787	10	103113933	+	Island	BTRC;BTRC;BTRC;BTRC
2132	cg26894311	0.000282417	0.0869799	0.252025	0.17776	0.0742646	10	104153930	+	Island	NFKB2;NFKB2
2738	cg07981845	0.00040879	0.0981299	0.021527	0.0188466	0.00268039	10	104154074	+	Island	NFKB2;NFKB2;NFKB2
2697	cg23606922	0.000398605	0.097157	0.031956	0.0265966	0.00535945	10	104155295	+	Island	NFKB2;NFKB2;NFKB2
813	cg18994254	5.88e-05	0.0475472	0.888557	0.925224	-0.036667	10	104495290	+	OpenSea	SFXN2				TRUE
1030	cg26722446	8.5e-05	0.054252	0.0192632	0.0160938	0.00316944	10	105156263	+	Island	PDCD11;USMG5
2042	cg14904586	0.000261584	0.0841967	0.834802	0.890568	-0.0557662	10	105238606	-	OpenSea	CALHM3
2416	cg15610777	0.000334028	0.090805	0.857519	0.911481	-0.053962	10	105238610	-	OpenSea	CALHM3
2755	cg22825631	0.00041179	0.0982737	0.0246232	0.0192597	0.00536351	10	105253538	-	Island	NEURL
2415	cg15434569	0.00033357	0.090805	0.0158885	0.0139488	0.00193972	10	105253716	+	Island	NEURL
967	cg07711556	7.74e-05	0.0526093	0.0541454	0.0441076	0.0100378	10	111767584	-	Island	ADD3;ADD3;ADD3
34	cg05366453	3.66e-07	0.00670651	0.571851	0.37828	0.193571	10	111829665	+	OpenSea	ADD3;ADD3;ADD3				TRUE
1054	cg18530282	8.92e-05	0.0556543	0.0196864	0.0158761	0.00381028	10	115439379	-	Island	CASP7;CASP7;CASP7;CASP7
2543	cg09632185	0.000360079	0.0931091	0.0191725	0.0158334	0.00333917	10	115934003	-	Island	MIR2110;C10orf118;C10orf118
672	cg18044663	4.23e-05	0.0414401	0.0261256	0.0220858	0.00403981	10	118032081	-	Island	GFRA1;GFRA1;GFRA1			DMR
10	cg02709100	7.18e-08	0.00411324	0.619613	0.731583	-0.11197	10	118442242	-	OpenSea	HSPA12A
2763	cg25078150	0.000413512	0.0983631	0.0261047	0.0202605	0.00584417	10	118922841	-	Island				DMR
1705	cg11729970	0.000194393	0.0749716	0.0299101	0.0238118	0.00609829	10	124639630	-	Island	FAM24B;LOC399815
2123	cg17642426	0.000280849	0.0869799	0.0390285	0.0310309	0.00799756	10	124739963	+	Island	PSTK;PSTK	high-CpG:124729899-124729959
2840	cg15016513	0.000427991	0.0990808	0.0327338	0.0280325	0.00470132	10	126150256	-	Island	LHPP;LHPP
1527	cg14466442	0.000166047	0.0714025	0.848093	0.865754	-0.0176613	10	126242636	+	OpenSea	LHPP;LHPP
2816	cg10567078	0.000423422	0.0988739	0.945808	0.957217	-0.0114086	10	126256344	-	OpenSea	LHPP;LHPP
2362	cg25699052	0.000320755	0.0892229	0.894401	0.927052	-0.0326503	10	126312068	-	OpenSea	FAM53B
1317	cg16355531	0.000129462	0.0646396	0.937082	0.950895	-0.013813	10	126370306	-	OpenSea	FAM53B
2376	cg16421726	0.000323041	0.0894012	0.764076	0.804406	-0.0403294	10	126629326	+	OpenSea	ZRANB1
2805	cg16697024	0.000420376	0.0985476	0.970115	0.977547	-0.00743142	10	126715891	-	Island	CTBP2;CTBP2;CTBP2
1854	cg02102829	0.000222207	0.0787757	0.0169085	0.0144611	0.0024474	10	126849762	-	Island	CTBP2;CTBP2
609	cg04754212	3.62e-05	0.0390881	0.619692	0.695516	-0.0758237	10	127506329	+	OpenSea	UROS
201	cg05804856	6.13e-06	0.0200604	0.545082	0.603187	-0.058105	10	127715083	-	OpenSea	ADAM12;ADAM12
1177	cg09556902	0.000106212	0.0591738	0.770601	0.706448	0.0641528	10	128776220	-	OpenSea	DOCK1
1245	cg24647506	0.000117161	0.0618808	0.794614	0.83294	-0.0383256	10	130366835	-	OpenSea
2555	cg26058778	0.000364573	0.0938286	0.969164	0.973289	-0.00412403	10	133376617	+	OpenSea
104	cg17243636	2.07e-06	0.0130254	0.933531	0.955462	-0.0219305	10	133835858	-	OpenSea
26	cg23035058	2.72e-07	0.00655192	0.920129	0.952886	-0.0327574	10	133982861	+	OpenSea	JAKMIP3
2179	cg05010219	0.000290191	0.087557	0.0287164	0.0216747	0.00704166	10	134210111	+	Island	PWWP2B;PWWP2B
2248	cg07647508	0.00030278	0.088359	0.826353	0.84824	-0.0218862	10	134419153	-	OpenSea	INPP5A
419	cg17215172	2.1e-05	0.0328311	0.931156	0.959072	-0.0279162	10	134549143	+	N_Shore	INPP5A
1288	cg05904135	0.000124612	0.063508	0.0264253	0.0226356	0.00378971	10	134599372	+	Island	NKX6-2			DMR
326	cg03801043	1.34e-05	0.0270249	0.944835	0.963675	-0.0188398	10	134890052	+	N_Shore
593	cg13751138	3.48e-05	0.0385384	0.849966	0.884725	-0.0347594	10	134970692	+	N_Shore
2411	cg25526061	0.000332526	0.090656	0.0313133	0.023084	0.0082293	10	135088451	-	N_Shore	ADAM8;ADAM8;ADAM8
2658	cg14614314	0.000391096	0.0967542	0.0177375	0.0149495	0.00278797	10	135150428	-	Island	CALY;CALY	high-CpG:135000358-135000555
438	cg00593699	2.23e-05	0.0333145	0.883084	0.916921	-0.0338368	11	472782	+	Island	PTDSS2
1377	cg21334682	0.000141492	0.0675522	0.0220323	0.0188958	0.00313654	11	561360	-	Island	RASSF7;LMNTD2;RASSF7;RASSF7
1950	cg15744637	0.000241419	0.0814102	0.0319251	0.0244356	0.00748956	11	809911	+	Island	RPLP2
1298	cg20801007	0.000125608	0.0635715	0.0184021	0.0157406	0.00266151	11	830320	-	Island	EFCAB4A			DMR
1486	cg12669354	0.000158612	0.0699679	0.810948	0.869968	-0.0590196	11	831584	-	Island	CD151;CD151;CD151;CD151;EFCAB4A				TRUE
198	cg27402845	6.03e-06	0.0199337	0.883785	0.922657	-0.0388723	11	1000533	+	OpenSea	AP2A2
1663	cg27380774	0.000188365	0.0744816	0.90649	0.939559	-0.0330698	11	1000560	+	OpenSea	AP2A2
2859	cg03267026	0.000433321	0.0996396	0.924536	0.940206	-0.0156706	11	1470086	-	Island	BRSK2
975	cg05809890	7.84e-05	0.0526705	0.898065	0.933664	-0.0355985	11	1491432	+	Island	HCCA2
1079	cg22387756	9.24e-05	0.0562863	0.937989	0.955374	-0.0173847	11	1495050	+	S_Shelf	HCCA2
2583	cg12614029	0.000372575	0.0948486	0.042957	0.0305375	0.0124195	11	2160564	-	Island	INS-IGF2;IGF2AS;IGF2;IGF2;IGF2AS;IGF2	high-CpG:2116060-2117232
644	cg24557020	3.98e-05	0.0405989	0.0129201	0.0106406	0.00227958	11	2422150	+	Island	TSSC4
5	cg23049234	5.03e-08	0.00411324	0.91943	0.960844	-0.041414	11	2595718	-	N_Shore	KCNQ1;KCNQ1
481	cg05989775	2.56e-05	0.0348363	0.0291173	0.0215024	0.00761486	11	2906934	+	Island	CDKN1C;CDKN1C;CDKN1C;CDKN1C;CDKN1C;CDKN1C
215	cg25093234	7.11e-06	0.0214411	0.947985	0.964761	-0.0167755	11	3114761	+	Island	OSBPL5;OSBPL5;OSBPL5
1369	cg04750265	0.000139102	0.0668144	0.539791	0.621059	-0.0812681	11	3127554	+	OpenSea	OSBPL5;OSBPL5;OSBPL5
2499	cg18650515	0.000350319	0.0921536	0.824311	0.800197	0.0241139	11	3837356	-	OpenSea	PGAP2;PGAP2;PGAP2;PGAP2;PGAP2;PGAP2;PGAP2;PGAP2;PGAP2;PGAP2;PGAP2;PGAP2;PGAP2;PGAP2;PGAP2;PGAP2;PGAP2;PGAP2;PGAP2;PGAP2;PGAP2;PGAP2				TRUE
2055	cg17510997	0.000264682	0.0846834	0.0263005	0.0226387	0.00366178	11	4116437	+	Island	RRM1
2575	cg26730416	0.000371077	0.0946956	0.0807432	0.0695467	0.0111965	11	4233502	+	OpenSea
2559	cg02780181	0.000365777	0.0939912	0.0165772	0.0139126	0.00266455	11	6704622	-	Island	MRPL17;MRPL17
1756	cg16437728	0.000204864	0.0767042	0.02044	0.0176915	0.00274857	11	7273046	+	Island	SYT9			DMR	TRUE
46	cg26121782	5.09e-07	0.00708837	0.018855	0.00972668	0.00912832	11	8284312	-	Island	LMO1			DMR	TRUE
1875	cg23500835	0.0002256	0.0790958	0.830063	0.859381	-0.0293176	11	8849195	-	OpenSea	ST5				TRUE
2597	cg21944027	0.000375863	0.0951513	0.0314287	0.0254622	0.00596645	11	8932512	+	N_Shore	C11orf17;ST5;C11orf17
1415	cg03323636	0.000147022	0.0681494	0.0325615	0.024654	0.0079076	11	9025502	+	Island	NRIP3;NRIP3
1141	cg13272676	0.000100749	0.0580628	0.735651	0.787319	-0.0516679	11	9404868	+	N_Shore	IPO7
1707	cg15003833	0.000194942	0.0750953	0.651256	0.699933	-0.0486769	11	9616835	+	OpenSea					TRUE
2602	cg07141824	0.000376626	0.0951797	0.0219364	0.0183525	0.00358389	11	9779714	-	Island
2589	cg23100152	0.000373792	0.0949378	0.0209031	0.0178691	0.003034	11	10472156	-	Island	AMPD3	high-CpG:10428689-10428828
194	cg16715129	5.94e-06	0.0199337	0.057841	0.0390278	0.0188131	11	10477821	+	OpenSea	AMPD3;AMPD3;AMPD3;AMPD3				TRUE
824	cg02052377	6.01e-05	0.0479671	0.62991	0.696685	-0.066775	11	10674182	-	OpenSea	MRVI1;MRVI1;MRVI1;MRVI1
2509	cg19496491	0.000352155	0.0922645	0.0155989	0.0134934	0.0021055	11	12695499	-	Island	TEAD1
1439	ch.11.340609R	0.000150038	0.0684932	0.0141067	0.0200142	-0.00590751	11	12831013	+	OpenSea	TEAD1				TRUE
1718	cg17760982	0.00019707	0.075429	0.723688	0.765377	-0.0416893	11	13740479	-	OpenSea	FAR1
2585	cg09068492	0.000373264	0.0949378	0.0675931	0.0802037	-0.0126106	11	14993658	-	Island	CALCA;CALCA;CALCA			DMR
2683	cg03174644	0.000395449	0.0968446	0.803748	0.841195	-0.0374468	11	15465937	+	OpenSea					TRUE
2774	cg22566500	0.000415554	0.0983804	0.871696	0.85885	0.0128459	11	15640579	+	OpenSea
2200	ch.11.444021F	0.000294877	0.087922	0.0582706	0.0599956	-0.00172503	11	18304952	+	OpenSea	HPS5;HPS5;HPS5
1920	cg04261192	0.000235774	0.0806608	0.0702861	0.0773252	-0.00703902	11	20691341	-	Island	NELL1;NELL1
2140	cg07601672	0.000283313	0.0869799	0.0138984	0.0114798	0.00241864	11	27384696	-	Island	CCDC34;CCDC34	high-CpG:27341261-27341426
1411	cg14002345	0.000145963	0.0680232	0.0156163	0.0123498	0.00326646	11	31833016	-	Island	PAX6;PAX6;PAX6			DMR
293	cg13202816	1.14e-05	0.0254933	0.0411682	0.029367	0.0118012	11	32605193	-	Island	EIF3M
2614	cg05004480	0.000378615	0.0952287	0.0204764	0.0173413	0.00313504	11	33757872	+	Island	CD59;CD59;CD59;CD59	high-CpG:33714448-33714595
825	cg27113480	6.02e-05	0.0479847	0.0244123	0.0189509	0.00546134	11	33757875	+	Island	CD59;CD59;CD59;CD59	high-CpG:33714448-33714595
1105	cg24458825	9.63e-05	0.0572647	0.902463	0.937178	-0.034715	11	34173913	+	OpenSea	ABTB2
1886	cg07399475	0.000228293	0.0795962	0.946086	0.950285	-0.00419876	11	34871676	+	OpenSea
1202	cg22019742	0.000110455	0.0604258	0.77973	0.808212	-0.0284821	11	44199815	+	OpenSea	EXT2;EXT2				TRUE
1266	cg15461516	0.000121538	0.0631122	0.0124571	0.0105599	0.00189724	11	45686369	-	Island	CHST1			DMR
2208	cg02030672	0.000295322	0.0879506	0.109405	0.0779046	0.0315008	11	45687055	-	Island	CHST1;CHST1			DMR
2141	cg13747109	0.000283474	0.0869799	0.903375	0.920258	-0.0168827	11	45933570	+	OpenSea	PEX16;PEX16
1074	cg11820818	9.18e-05	0.0561886	0.0272753	0.0233342	0.00394106	11	46141207	-	OpenSea	PHF21A;PHF21A
2325	cg05161278	0.000315667	0.0891098	0.896105	0.906982	-0.0108769	11	47326930	-	OpenSea	MADD;MADD;MADD;MADD;MADD;MADD;MADD;MADD;MADD;MADD
806	cg03824268	5.8e-05	0.047285	0.966969	0.974606	-0.00763666	11	47445642	+	N_Shelf	PSMC3
1519	cg15148879	0.000163807	0.0708668	0.0165681	0.0139642	0.00260386	11	47788577	+	Island	FNBP4
2173	cg04937561	0.000288999	0.0874293	0.0187457	0.0149434	0.00380231	11	57103057	+	Island	SSRP1
830	cg13582500	6.14e-05	0.0486097	0.564227	0.649767	-0.0855393	11	57436966	-	S_Shore	ZDHHC5
1125	cg14333691	9.88e-05	0.0576483	0.625311	0.684663	-0.0593514	11	59566266	+	OpenSea	STX3
1772	cg22627404	0.000209263	0.0776552	0.887335	0.910488	-0.023153	11	59705429	+	OpenSea
2307	cg24299813	0.000312938	0.0891098	0.701152	0.748079	-0.0469273	11	60685836	+	S_Shelf	TMEM109
622	cg02384811	3.73e-05	0.0394284	0.956263	0.974813	-0.0185499	11	60701068	-	N_Shore	TMEM132A;TMEM132A				TRUE
2744	cg17597374	0.000410044	0.0981299	0.976914	0.981813	-0.00489913	11	61106595	-	N_Shore	DAK
383	cg05587970	1.78e-05	0.0305448	0.704416	0.755113	-0.0506968	11	61187174	-	OpenSea	CPSF7;CPSF7;CPSF7
966	cg03949158	7.73e-05	0.0525997	0.037101	0.0273553	0.00974565	11	61447938	-	Island	DAGLA;DAGLA	high-CpG:61204392-61204633
675	cg25700938	4.34e-05	0.0421546	0.0455305	0.0267153	0.0188152	11	61658919	-	Island	FADS3;FADS3	high-CpG:61415492-61415632
730	cg21636168	5.02e-05	0.0452002	0.944187	0.960245	-0.0160579	11	61914232	-	OpenSea	INCENP;INCENP
1586	cg12069677	0.000175742	0.0728642	0.786915	0.83565	-0.0487346	11	62447985	-	S_Shore	UBXN1;UBXN1;UBXN1
2275	cg19905802	0.000305749	0.0883667	0.023111	0.0192188	0.00389217	11	62554200	+	Island	TMEM179B;TAF6L
2664	cg13559099	0.000392425	0.0967949	0.0207183	0.0174139	0.00330433	11	62554740	+	Island	TMEM179B;TAF6L
1789	cg18394496	0.000212083	0.077906	0.010596	0.00922293	0.00137304	11	62554881	-	Island	TMEM179B;TMEM179B	high-CpG:62311393-62311490
773	cg03790745	5.45e-05	0.0461814	0.948994	0.964321	-0.0153276	11	63679432	-	Island	RCOR2
1534	cg03457485	0.000166897	0.0714025	0.112467	0.0844604	0.0280067	11	63753251	-	N_Shore	OTUB1;OTUB1
1222	cg19924313	0.000113289	0.0609618	0.0303527	0.025336	0.00501668	11	64008353	+	Island	FKBP2;FKBP2;FKBP2
2253	cg12929567	0.000303281	0.088359	0.0216938	0.0182418	0.00345201	11	64059594	-	Island	KCNK4				TRUE
595	cg26107100	3.49e-05	0.0385686	0.882677	0.920284	-0.0376064	11	64112546	-	Island	CCDC88B
2601	cg11936089	0.000376532	0.0951797	0.651464	0.726016	-0.0745516	11	64270294	-	OpenSea
132	cg01748193	2.86e-06	0.0142317	0.906931	0.936562	-0.0296313	11	64335575	-	Island	SLC22A11
1699	cg21842222	0.000193398	0.0748296	0.00994178	0.00856165	0.00138013	11	64546304	+	Island	SF1;SF1;SF1;SF1
221	cg15323937	7.26e-06	0.0214951	0.940469	0.965375	-0.0249056	11	64599019	-	S_Shore	CDC42BPG
2382	cg04948875	0.000324696	0.0896349	0.815451	0.856231	-0.0407797	11	64622984	+	S_Shore	EHD1;EHD1;EHD1				TRUE
868	cg22060484	6.6e-05	0.0499208	0.0194457	0.0159566	0.00348917	11	64646415	+	Island	EHD1	high-CpG:64402501-64403083
976	cg15116488	7.84e-05	0.0526705	0.020725	0.0182404	0.00248461	11	64794988	+	Island	SNX15;SNX15;SNX15;SNX15	high-CpG:64551472-64551579
1175	cg21942282	0.000106129	0.0591738	0.353677	0.450411	-0.0967348	11	64868530	+	OpenSea	VPS51;VPS51
588	cg05781820	3.43e-05	0.0383038	0.751395	0.804794	-0.0533991	11	65090854	+	OpenSea					TRUE
946	cg19517014	7.44e-05	0.0516868	0.0418474	0.0259266	0.0159208	11	65101065	+	N_Shore	DPF2
1900	cg07143296	0.000230838	0.0798526	0.021412	0.0173964	0.00401559	11	65383706	-	Island	PCNXL3	high-CpG:65139723-65140285
112	cg04962756	2.35e-06	0.0137865	0.940622	0.963834	-0.0232114	11	65425928	-	OpenSea	RELA;RELA	low-CpG:65182495-65182804
761	cg27133880	5.39e-05	0.0461814	0.012064	0.0103188	0.00174528	11	65479836	+	Island	KAT5;KAT5;KAT5;KAT5;KAT5;KAT5
861	cg06190547	6.55e-05	0.0499208	0.0124511	0.0101595	0.00229161	11	65488312	-	Island	RNASEH2C;RNASEH2C	high-CpG:65244486-65244901
1984	cg06954540	0.000248413	0.0822409	0.0124295	0.0103586	0.0020709	11	65686660	-	Island	C11orf68;C11orf68;DRAP1
2534	cg07174979	0.000357388	0.0927415	0.0117741	0.0104243	0.00134983	11	65819836	-	Island	SF3B2;SF3B2	high-CpG:65576379-65576428
1396	cg03128921	0.000143481	0.0675851	0.0412066	0.0299289	0.0112777	11	66035086	+	N_Shore	KLC2;RAB1B;KLC2;KLC2;KLC2
2124	cg15082918	0.000281233	0.0869799	0.0220073	0.0188594	0.00314785	11	66104153	+	S_Shore	RIN1				TRUE
935	cg14522647	7.34e-05	0.0514617	0.636003	0.705404	-0.0694009	11	66382677	+	N_Shore	RBM14;RBM14-RBM4;RBM14-RBM4;RBM14;RBM14
905	cg08971859	7.04e-05	0.0510953	0.896543	0.931884	-0.0353409	11	66489022	-	OpenSea	SPTBN2
540	cg10151248	3.07e-05	0.0373239	0.873902	0.920256	-0.0463537	11	66639567	-	OpenSea	PC;PC;PC	low-CpG:66395878-66396179
2267	cg15693066	0.000304954	0.088359	0.0160199	0.0139216	0.00209829	11	66824189	-	Island	RHOD
1437	cg20968200	0.000149893	0.0684932	0.03404	0.043678	-0.00963806	11	67070164	+	N_Shore	SSH3
1216	cg08498597	0.000112761	0.0609618	0.874981	0.921107	-0.0461257	11	67163067	+	N_Shelf	RAD9A
2079	cg02466984	0.000271009	0.0857177	0.856015	0.894834	-0.038819	11	67378982	-	OpenSea	NDUFV1;NDUFV1
455	cg10206070	2.37e-05	0.0341701	0.692946	0.776035	-0.0830888	11	67791338	-	S_Shore	ALDH3B1;ALDH3B1;ALDH3B1;ALDH3B1;ALDH3B1
355	cg25367890	1.59e-05	0.0292505	0.960818	0.972566	-0.0117485	11	67815048	-	OpenSea	TCIRG1;TCIRG1
1563	cg26910867	0.000171997	0.0723485	0.0404466	0.0302299	0.0102167	11	68228179	-	Island	SAPS3;SAPS3;SAPS3;SAPS3;SAPS3;SAPS3
1690	cg11361442	0.000192073	0.074708	0.8618	0.914148	-0.0523484	11	68841024	+	OpenSea	TPCN2
1934	cg21205288	0.000239459	0.0813567	0.949127	0.949928	-0.000800748	11	69001516	-	OpenSea
2711	cg14513281	0.000401792	0.0973593	0.0189708	0.0184677	0.000503075	11	69455457	+	Island	CCND1
51	cg19060203	5.82e-07	0.00708837	0.743159	0.822539	-0.07938	11	70150660	-	OpenSea	PPFIA1;PPFIA1				TRUE
270	cg08975529	1.03e-05	0.025161	0.911309	0.941771	-0.0304625	11	70309722	-	Island
2813	cg06146607	0.000422786	0.0988309	0.883389	0.926588	-0.0431987	11	71167505	+	S_Shelf	NADSYN1
1750	cg16929187	0.000203293	0.0763879	0.0170677	0.0146073	0.00246043	11	71791555	+	Island	LRTOMT;NUMA1;LRTOMT;LRTOMT;LRTOMT;LRTOMT;LRTOMT;NUMA1;LRTOMT;LRTOMT;LRTOMT	high-CpG:71468925-71469413
2618	cg23186104	0.000379917	0.0953639	0.0522495	0.0384697	0.0137798	11	72353587	+	Island	PDE2A;PDE2A;PDE2A;PDE2A				TRUE
1326	cg01807303	0.00013149	0.0652021	0.409872	0.473425	-0.063553	11	73495319	+	N_Shelf
1143	cg02166290	0.000101571	0.0584261	0.644085	0.686184	-0.0420997	11	74138810	-	OpenSea
2399	cg04598719	0.000329934	0.0903981	0.0262988	0.0214002	0.00489855	11	74204211	+	Island	LIPT2
323	cg19656847	1.31e-05	0.0267087	0.727744	0.784823	-0.0570795	11	75996257	+	OpenSea					TRUE
377	cg07590922	1.72e-05	0.0300053	0.659221	0.722988	-0.0637666	11	76152669	+	N_Shelf
1570	cg26674199	0.000173176	0.0724546	0.0120457	0.0101543	0.00189138	11	76156040	+	Island	C11orf30
1884	cg06053850	0.000227938	0.0795569	0.543605	0.601783	-0.0581786	11	76510871	+	S_Shore					TRUE
2153	cg26996201	0.000285786	0.0872488	0.00953529	0.00796451	0.00157079	11	77122864	-	Island	PAK1;PAK1
1049	cg10395222	8.84e-05	0.0554012	0.0246634	0.0215694	0.00309405	11	82612636	+	Island	PRCP;C11orf82;PRCP
2250	cg05178338	0.000302848	0.088359	0.692314	0.565457	0.126857	11	92958696	+	OpenSea
2175	cg14602201	0.000289448	0.087509	0.739407	0.769425	-0.0300179	11	93521707	-	S_Shelf	MED17
817	cg18834652	5.93e-05	0.0476998	0.729658	0.776958	-0.0473001	11	94276072	+	N_Shore	FUT4			CDMR
2732	cg24462596	0.000406156	0.0977584	0.0421747	0.0326888	0.00948587	11	94706862	-	Island	KDM4D;KDM4D;CWC15	high-CpG:94346428-94346539
2462	cg14107975	0.000343201	0.0916647	0.0504686	0.0396217	0.0108468	11	96076498	-	OpenSea	MAML2
2062	cg19793131	0.000265879	0.0847885	0.765044	0.78034	-0.0152953	11	96209225	-	OpenSea	JRKL-AS1
779	cg00385983	5.5e-05	0.0461814	0.680545	0.734191	-0.053646	11	100306916	+	OpenSea					TRUE
2873	cg14774480	0.000436898	0.0999968	0.766912	0.817305	-0.0503928	11	102653516	+	OpenSea	WTAPP1
2213	cg26220419	0.00029617	0.0879718	0.0153842	0.0131037	0.00228049	11	107880052	+	Island	CUL5;CUL5	high-CpG:107384819-107385272
1292	cg00479770	0.00012482	0.063508	0.817848	0.851135	-0.0332878	11	111289721	-	OpenSea	LOC100132078
1746	cg21881253	0.000202109	0.0761171	0.0364734	0.0310879	0.00538557	11	111383576	-	Island	MIR34B;BTG4;MIR34C			DMR
248	cg15905960	9.14e-06	0.0242324	0.0195253	0.0154496	0.00407573	11	111473361	-	Island	SIK2	high-CpG:110978309-110978818
1032	cg08628232	8.55e-05	0.054502	0.0257917	0.0183555	0.00743624	11	112097546	+	Island	PTS
1168	cg01294198	0.000105491	0.0591738	0.963067	0.96931	-0.00624327	11	114069977	-	Island	ZBTB16;ZBTB16
1652	cg05457537	0.000187067	0.0743365	0.0251498	0.0219722	0.00317761	11	114271459	-	Island	RBM7;RBM7;RBM7;RBM7;RBM7;RBM7;RBM7;RBM7;C11orf71;C11orf71
161	cg03427636	4.34e-06	0.0175502	0.884958	0.926261	-0.041303	11	116981249	-	OpenSea
2406	cg17007365	0.000330936	0.0904461	0.0427201	0.0304516	0.0122684	11	117186700	-	Island	BACE1;BACE1;BACE1;BACE1;BACE1;BACE1;BACE1;BACE1	high-CpG:116691574-116692252
2310	cg20688757	0.00031331	0.0891098	0.0232897	0.0203857	0.00290402	11	117198527	-	Island	CEP164
1161	cg12985204	0.000104474	0.0591472	0.779484	0.855551	-0.0760673	11	117352939	-	Island	DSCAML1
1443	cg01651311	0.000150354	0.0685004	0.68698	0.816859	-0.129879	11	117704570	+	OpenSea	FXYD6-FXYD2;FXYD6-FXYD2
1424	cg04968900	0.000147638	0.0681494	0.0223414	0.0175527	0.00478871	11	117747390	-	Island	FXYD6;FXYD6;FXYD6;FXYD6;FXYD6;FXYD6;FXYD6;FXYD6;FXYD6	high-CpG:117252270-117252843		DMR
2282	cg18519694	0.000307228	0.0884971	0.0872619	0.0537931	0.0334688	11	118307647	-	Island	MLL
1494	cg05230647	0.000159038	0.0699679	0.0109244	0.00938935	0.00153508	11	118401801	-	Island	TMEM25;TMEM25;TMEM25;TMEM25;TMEM25;TMEM25	high-CpG:117906565-117907175
1107	cg10260050	9.64e-05	0.0572647	0.79779	0.802144	-0.00435408	11	118415431	+	OpenSea	C11orf60;TMEM25;TMEM25;C11orf60
1235	cg01565343	0.000115341	0.0614129	0.603847	0.676438	-0.0725913	11	118774003	+	OpenSea	BCL9L
1731	cg20349076	0.000199763	0.0758607	0.0327361	0.024105	0.00863112	11	118992192	+	Island	HINFP;HINFP
1889	cg25223263	0.000229385	0.0797683	0.0536768	0.0374217	0.0162551	11	119020168	-	Island	ABCG4;ABCG4
449	cg00395990	2.32e-05	0.0340296	0.58868	0.679861	-0.0911814	11	119054921	+	OpenSea	PDZD3;PDZD3
279	cg04890495	1.07e-05	0.025161	0.0164551	0.0127313	0.00372381	11	119187021	-	Island	MCAM
1211	cg26864130	0.000111996	0.0607835	0.0428013	0.029754	0.0130473	11	119187858	-	Island	MCAM	high-CpG:118693022-118693082
2726	cg09048129	0.00040545	0.0977584	0.0879688	0.0598347	0.0281341	11	119234607	-	Island	USP2;USP2			DMR
1260	cg19331885	0.000120745	0.062983	0.790313	0.832832	-0.0425192	11	119722305	+	OpenSea			chr11:119722087-119722087
1156	cg16966998	0.000103597	0.0589292	0.893681	0.909796	-0.016115	11	120673570	-	OpenSea	GRIK4;GRIK4;GRIK4;GRIK4;GRIK4;GRIK4
2150	cg26808852	0.000285067	0.0871866	0.690783	0.732353	-0.0415704	11	121998436	+	OpenSea	LOC399959				TRUE
82	cg15543154	1.21e-06	0.00962479	0.796893	0.849991	-0.0530978	11	123146856	-	OpenSea
2298	cg13921910	0.000310811	0.088938	0.00990969	0.00866365	0.00124604	11	123301758	+	Island		high-CpG:122806951-122806975		DMR
1340	cg02504716	0.00013377	0.0656442	0.949286	0.961354	-0.0120687	11	124071642	-	OpenSea
2343	cg10853556	0.000318035	0.089179	0.0203052	0.0175508	0.00275431	11	125462468	+	Island	STT3A
637	cg11060199	3.91e-05	0.0402417	0.868999	0.888196	-0.0191962	11	126200910	+	OpenSea	DCPS				TRUE
678	cg16685832	4.35e-05	0.0421546	0.841182	0.87356	-0.0323788	11	126284163	-	N_Shelf	ST3GAL4
1552	cg02443871	0.000169277	0.0717213	0.845493	0.859813	-0.01432	11	128738744	+	OpenSea	KCNJ1;KCNJ1;KCNJ1;KCNJ1
1115	cg19919303	9.72e-05	0.0572969	0.0181597	0.0150515	0.00310816	11	129245922	+	Island	BARX2;BARX2
42	cg12926137	4.36e-07	0.00682638	0.777672	0.828806	-0.0511345	11	129901261	-	N_Shore
1152	cg01465838	0.000102718	0.0586319	0.926193	0.939402	-0.0132095	11	129903191	+	S_Shore
1724	cg11691170	0.000198238	0.0756122	0.0249218	0.0192583	0.00566347	11	130318691	-	Island	ADAMTS15	high-CpG:129823586-129823991
2809	cg24364535	0.000421541	0.0986463	0.0426263	0.0379676	0.00465869	11	133098499	+	OpenSea	OPCML
9	cg13223329	7.12e-08	0.00411324	0.778551	0.845831	-0.0672805	11	133274220	-	OpenSea	OPCML
2417	cg16265283	0.000334073	0.090805	0.740435	0.634341	0.106094	11	134542450	+	OpenSea
1887	cg01104200	0.000228618	0.0796672	0.880566	0.907467	-0.0269012	12	562065	+	N_Shore
1155	cg06384694	0.000103405	0.058871	0.0189284	0.0149301	0.00399832	12	2986361	-	Island	RHNO1;RHNO1;RHNO1;RHNO1;RHNO1;RHNO1;FOXM1;FOXM1;FOXM1;FOXM1;FOXM1;RHNO1	high-CpG:2856356-2856876;high-CpG:2856622-2856679
1144	cg19263974	0.00010165	0.0584261	0.931046	0.950449	-0.0194031	12	3103878	+	OpenSea	TEAD4;TEAD4;TEAD4
1850	cg24891523	0.000221829	0.0787734	0.876719	0.903061	-0.0263422	12	4007934	+	OpenSea
2354	cg22678952	0.000319332	0.0892026	0.0116053	0.00972314	0.00188215	12	4382123	-	Island	CCND2				TRUE
2118	cg15264083	0.000279635	0.0868173	0.0225039	0.0186718	0.00383208	12	4382980	+	N_Shore	CCND2;CCND2
1419	cg02385840	0.000147336	0.0681494	0.0421583	0.0315876	0.0105707	12	5539588	-	N_Shore
596	cg05751616	3.5e-05	0.0386022	0.644261	0.71074	-0.0664787	12	6652601	+	S_Shelf	IFFO1;IFFO1;IFFO1
199	cg11745539	6.03e-06	0.0199337	0.766136	0.838244	-0.0721084	12	6652604	+	S_Shelf	IFFO1;IFFO1;IFFO1;IFFO1
289	cg15316734	1.13e-05	0.0254933	0.903922	0.938421	-0.0344989	12	6657949	+	Island	IFFO1;IFFO1;IFFO1				TRUE
458	cg06444189	2.38e-05	0.0341973	0.673136	0.741728	-0.0685919	12	6953740	+	OpenSea	GNB3;GNB3
1367	cg13587325	0.00013854	0.0666419	0.0292824	0.0189409	0.0103415	12	6977202	-	Island	TPI1;TPI1;TPI1
130	cg14224638	2.76e-06	0.0139844	0.686814	0.731394	-0.0445803	12	7171203	+	OpenSea	C1S;C1S
941	cg15803261	7.37e-05	0.0514617	0.763656	0.810267	-0.0466108	12	11049876	-	OpenSea	PRH1-PRR4;PRH1;PRH1
1688	cg12807090	0.000192025	0.074708	0.0352243	0.0284535	0.00677081	12	12940139	-	Island	APOLD1;APOLD1				TRUE
2519	cg05222840	0.000353545	0.0922645	0.0221367	0.0188526	0.00328414	12	15942164	+	Island	EPS8;EPS8	high-CpG:15833383-15833648
2214	cg17372451	0.000296454	0.0879718	0.644096	0.700429	-0.0563329	12	16275078	-	OpenSea
2040	cg03355286	0.000260407	0.0839391	0.553208	0.598557	-0.0453491	12	20962423	-	OpenSea	SLCO1B3
1004	cg04492191	8.1e-05	0.0530661	0.713907	0.758869	-0.0449623	12	21167330	+	OpenSea	SLCO1B7
1160	cg02659794	0.000104206	0.0590713	0.029122	0.0242466	0.00487543	12	21810750	-	Island	LDHB;LDHB	low-CpG:21701999-21702078		DMR
1701	cg05180270	0.000193678	0.0748715	0.909513	0.915955	-0.00644218	12	21918784	+	OpenSea	KCNJ8
232	cg02850821	8.03e-06	0.0227482	0.0574191	0.0506244	0.00679465	12	25403680	-	OpenSea	KRAS;KRAS
665	cg17643699	4.21e-05	0.0414401	0.0632601	0.0415579	0.0217022	12	27091484	+	Island	FGFR1OP2;C12orf11;FGFR1OP2
891	cg13246328	6.84e-05	0.0504947	0.598291	0.651403	-0.0531116	12	28179213	-	OpenSea
1034	cg20942933	8.59e-05	0.0546262	0.803281	0.832173	-0.0288916	12	29227192	+	OpenSea					TRUE
2749	cg03532709	0.000410547	0.0981299	0.0372031	0.0308356	0.00636749	12	31881951	+	Island	AMN1;AMN1;AMN1	high-CpG:31773216-31773300
2851	cg00237589	0.00043055	0.0993041	0.121082	0.170044	-0.0489617	12	32833447	-	S_Shore	DNM1L;DNM1L;DNM1L;DNM1L;DNM1L;DNM1L;DNM1L
361	cg14679607	1.62e-05	0.029361	0.801033	0.87716	-0.0761268	12	34527230	+	OpenSea
1831	cg05315595	0.000218945	0.0785976	0.700935	0.745927	-0.0449926	12	38450822	-	OpenSea
2019	cg07219978	0.000256337	0.0834865	0.917995	0.931236	-0.0132407	12	38548782	+	OpenSea
179	cg04962704	5.2e-06	0.0191069	0.645138	0.709861	-0.0647231	12	40202210	-	OpenSea	SLC2A13
1815	cg16896079	0.000216284	0.0783591	0.0168113	0.0146792	0.00213211	12	41582362	-	Island	PDZRN4
318	cg14084056	1.26e-05	0.0260124	0.0241838	0.0197064	0.00447731	12	48744539	+	Island	ZNF641
1917	cg19952067	0.000235279	0.080626	0.735545	0.68172	0.0538244	12	49062856	+	OpenSea	C12orf41;SNORA2B
599	cg03686090	3.52e-05	0.0386063	0.627522	0.733633	-0.106111	12	49172375	+	OpenSea	ADCY6
874	cg18186592	6.65e-05	0.0499455	0.0202918	0.0161818	0.00410997	12	49483821	-	Island	DHH
762	cg20456276	5.4e-05	0.0461814	0.0118384	0.0099944	0.00184397	12	51157683	+	Island	ATF1	high-CpG:49443903-49444542
1811	cg01739401	0.000215903	0.0783541	0.647882	0.723647	-0.0757652	12	51208362	+	OpenSea	ATF1
1460	cg03921179	0.000154889	0.0696888	0.0196113	0.0169641	0.00264727	12	51819019	+	Island	SLC4A8;SLC4A8
2662	cg09770068	0.000391821	0.0967878	0.802694	0.83425	-0.0315558	12	52294251	-	Island
1018	cg01259359	8.32e-05	0.0537125	0.0170665	0.0153203	0.0017462	12	52345074	-	N_Shore	ACVR1B;ACVR1B
1398	cg03733196	0.000144103	0.067781	0.0254246	0.0199768	0.00544784	12	52445075	+	Island	NR4A1;NR4A1
819	cg23548728	5.99e-05	0.0479671	0.688585	0.737612	-0.0490276	12	53559182	-	OpenSea	CSAD;CSAD;CSAD
2273	cg02390588	0.000305524	0.088359	0.897666	0.92648	-0.0288134	12	53722253	-	S_Shelf	SP7
1464	cg06006168	0.000155357	0.0697337	0.0847621	0.0562632	0.028499	12	53893448	+	Island	TARBP2;TARBP2;MAP3K12;MAP3K12	high-CpG:52179462-52179761
893	cg21837192	6.86e-05	0.0504947	0.0439978	0.0330584	0.0109394	12	54398765	+	N_Shore
1585	cg00659495	0.000175691	0.0728642	0.0424145	0.0384928	0.00392167	12	54520336	+	Island	LOC400043			DMR
2423	cg24811731	0.00033479	0.090805	0.0242549	0.0203297	0.00392519	12	56110231	+	Island	BLOC1S1;BLOC1S1;BLOC1S1;BLOC1S1;BLOC1S1-RDH5
624	cg11520665	3.81e-05	0.0400114	0.0190613	0.0159037	0.0031576	12	56223332	+	Island	DNAJC14;DNAJC14	high-CpG:54509558-54509702
2383	cg03833569	0.000325171	0.0897281	0.526567	0.573551	-0.0469847	12	56550708	+	OpenSea	MYL6B;MYL6B;MYL6;MYL6
1046	cg08214142	8.76e-05	0.0550683	0.702699	0.743839	-0.0411402	12	56623826	+	OpenSea	SLC39A5;SLC39A5;SLC39A5
2722	cg03122372	0.00040437	0.097686	0.0287122	0.0238984	0.00481379	12	56651912	-	Island	ANKRD52
1393	cg16928752	0.000143167	0.0675777	0.0180698	0.01479	0.00327986	12	57082304	+	Island	PTGES3;PTGES3;PTGES3;PTGES3;PTGES3;PTGES3;PTGES3
796	cg23267966	5.66e-05	0.0467649	0.0293752	0.0225329	0.00684227	12	57146137	-	Island	PRIM1;PRIM1	high-CpG:55432363-55432438
879	cg05919975	6.7e-05	0.0499455	0.660965	0.726882	-0.0659163	12	57148848	-	S_Shelf
997	cg21217812	8.03e-05	0.0529396	0.798041	0.842081	-0.0440396	12	57995934	-	OpenSea	PIP4K2C;PIP4K2C;PIP4K2C;PIP4K2C
1029	cg07122172	8.49e-05	0.054252	0.0455635	0.0335097	0.0120537	12	58026544	+	Island	B4GALNT1	high-CpG:56312649-56313310			TRUE
2433	cg25402979	0.000336935	0.0910303	0.965757	0.973393	-0.00763632	12	58068659	+	Island
1704	cg08877035	0.000194119	0.0749099	0.0314039	0.0239769	0.00742693	12	62829123	-	OpenSea					TRUE
2381	cg07875692	0.000323973	0.0894728	0.711125	0.641588	0.0695372	12	64173139	+	N_Shore	TMEM5
311	cg03947261	1.24e-05	0.0260124	0.717531	0.78107	-0.0635387	12	64515314	+	OpenSea	SRGAP1
669	cg25477905	4.22e-05	0.0414401	0.733235	0.803055	-0.0698197	12	65212496	+	OpenSea
911	cg08757142	7.08e-05	0.0510953	0.673412	0.75037	-0.0769584	12	66036823	-	OpenSea	LOC100507065;LOC100507065;LOC100507065;LOC100507065
910	cg24777315	7.08e-05	0.0510953	0.0268843	0.0218979	0.00498641	12	66135734	+	Island				DMR
815	cg04939480	5.91e-05	0.0476841	0.81983	0.860587	-0.0407572	12	66250466	-	OpenSea	HMGA2;HMGA2				TRUE
1083	cg09101657	9.29e-05	0.0564361	0.0153343	0.0122889	0.0030454	12	66563894	-	Island	TMBIM4
1256	cg11160386	0.000120282	0.0629725	0.0432155	0.0337948	0.00942069	12	68725932	-	Island	MDM1;MDM1
1861	cg00758412	0.000222968	0.0787757	0.571145	0.410578	0.160568	12	69033023	+	OpenSea	RAP1B;RAP1B;RAP1B;RAP1B;RAP1B;RAP1B
1510	cg19692836	0.000161602	0.0702827	0.700045	0.751252	-0.0512065	12	69127788	-	OpenSea	NUP107
995	cg26286479	7.99e-05	0.0527569	0.868881	0.91381	-0.0449297	12	69924501	+	OpenSea	FRS2;FRS2;FRS2;FRS2;FRS2;FRS2;FRS2;FRS2
1515	cg16544548	0.000161927	0.0702827	0.0265201	0.0189961	0.00752406	12	69979295	-	Island	MIR3913-1;CCT2;CCT2;CCT2
312	cg15604046	1.25e-05	0.0260124	0.553739	0.638459	-0.0847197	12	72740698	-	OpenSea	TRHDE				TRUE
406	cg25931282	1.97e-05	0.0319076	0.581359	0.681577	-0.100218	12	75604326	-	S_Shore	KCNC2;KCNC2;KCNC2;KCNC2;KCNC2;KCNC2
2393	cg19588213	0.000326915	0.0898326	0.0125159	0.011005	0.00151092	12	76953456	+	Island	OSBPL8;OSBPL8;OSBPL8;OSBPL8	high-CpG:75477400-75477786
1767	cg09112255	0.000207885	0.0773619	0.7737	0.811665	-0.0379654	12	83054862	-	OpenSea
66	cg00047843	7.55e-07	0.00752611	0.613214	0.65436	-0.0411454	12	83321412	+	OpenSea	TMTC2				TRUE
1247	cg14996220	0.000117764	0.0620992	0.0384592	0.0323814	0.00607782	12	85673270	+	N_Shore	ALX1			RDMR
1734	cg19586702	0.000200138	0.0758607	0.810268	0.842738	-0.0324709	12	88178203	+	OpenSea
876	cg22688836	6.67e-05	0.0499455	0.920543	0.933325	-0.0127823	12	88967594	+	OpenSea	KITLG;KITLG				TRUE
1622	cg15104066	0.000181956	0.0737661	0.0319068	0.0251763	0.00673045	12	90102578	-	Island	LOC338758
101	cg00015699	1.97e-06	0.0128052	0.916031	0.941501	-0.02547	12	90313589	-	OpenSea					TRUE
1682	cg22084165	0.00019156	0.074708	0.874936	0.895446	-0.0205106	12	92294605	+	OpenSea
2834	cg11227628	0.000426888	0.0990502	0.0118567	0.0103927	0.00146401	12	93964787	+	Island	SOCS2	high-CpG:92488880-92488971
1883	cg16252691	0.000227867	0.0795569	0.614221	0.677112	-0.0628913	12	94498285	-	S_Shelf
2852	cg24405664	0.000431367	0.0994577	0.0172826	0.0141374	0.00314525	12	95611285	+	Island	FGD6;VEZT	high-CpG:94135154-94135581
1485	cg27485605	0.000158593	0.0699679	0.650667	0.714353	-0.0636856	12	96430600	+	S_Shore	LTA4H;LTA4H;LTA4H
2011	cg26088244	0.000254597	0.0832498	0.0269395	0.02355	0.00338946	12	98897833	+	Island
1991	cg10568931	0.000249814	0.0824802	0.0255509	0.0191782	0.00637277	12	100536436	-	Island	UHRF1BP1L;UHRF1BP1L;UHRF1BP1L;UHRF1BP1L
1951	cg04939522	0.000241974	0.0815554	0.0159423	0.0136251	0.00231718	12	100660927	-	Island	SCYL2;DEPDC4	high-CpG:99184718-99185548
254	cg12449273	9.69e-06	0.024908	0.78418	0.845472	-0.0612921	12	100726277	+	OpenSea	SCYL2
1642	cg08314899	0.000185411	0.0742211	0.723718	0.777888	-0.0541703	12	102045493	+	OpenSea	MYBPC1;MYBPC1;MYBPC1;MYBPC1;MYBPC1;MYBPC1;MYBPC1;MYBPC1;MYBPC1;MYBPC1
1294	cg22324297	0.000124975	0.063508	0.626981	0.682541	-0.0555603	12	103508848	+	OpenSea
1368	cg20830389	0.000138804	0.0667204	0.0217639	0.0180804	0.00368349	12	105724410	-	Island	C12orf75	high-CpG:104248520-104248876
2247	cg24577940	0.000302733	0.088359	0.749268	0.808801	-0.0595329	12	106469246	-	OpenSea	NUAK1
2185	cg04637204	0.000291445	0.0876793	0.0213365	0.0168666	0.00446988	12	106532491	-	Island	NUAK1;NUAK1	high-CpG:105056577-105057446
1700	cg14566061	0.000193455	0.0748296	0.857776	0.887623	-0.0298465	12	106583254	-	OpenSea
2512	cg26212496	0.000352533	0.0922645	0.0241171	0.0211244	0.00299261	12	107487708	-	Island	CRY1
2178	cg16434195	0.000290146	0.087557	0.963432	0.972928	-0.00949641	12	109889508	+	OpenSea	KCTD10				TRUE
2765	cg11931667	0.000413605	0.0983631	0.011704	0.00966343	0.00204053	12	110151938	+	Island	C12orf34
1138	cg24986225	0.000100585	0.0580578	0.801874	0.854816	-0.052942	12	110640808	-	OpenSea	IFT81;IFT81
2111	cg19509829	0.000278344	0.0866908	0.796654	0.902551	-0.105897	12	110778665	-	OpenSea	ATP2A2;ATP2A2;ATP2A2
2537	cg11309456	0.000358604	0.0929197	0.604045	0.678313	-0.0742682	12	110942599	+	S_Shelf	RAD9B
785	cg00460689	5.52e-05	0.0461814	0.0353749	0.0295072	0.00586767	12	111021191	+	Island	PPTC7
907	cg23471890	7.06e-05	0.0510953	0.0319513	0.0252768	0.00667452	12	111051874	+	Island	TCTN1;TCTN1;TCTN1	high-CpG:109536250-109536403
135	cg26418363	3.12e-06	0.0151685	0.0159896	0.0129829	0.00300661	12	111284749	-	OpenSea	CCDC63;CCDC63;CCDC63			DMR
2405	cg00391320	0.00033089	0.0904461	0.615258	0.695017	-0.0797586	12	112127825	+	S_Shelf	ACAD10;ACAD10
2098	cg16207631	0.000275541	0.086327	0.0171454	0.0145799	0.00256552	12	112856603	-	Island	PTPN11;PTPN11;PTPN11;PTPN11
2378	cg11596863	0.000323373	0.0894197	0.0199986	0.0183934	0.00160519	12	113013215	-	Island					TRUE
1329	cg18807485	0.000131904	0.0652639	0.0514874	0.0358024	0.015685	12	113902885	-	Island	LHX5
2443	cg11357746	0.000338655	0.0910968	0.0250239	0.0216152	0.00340871	12	114837887	-	N_Shore	TBX5;TBX5;TBX5;TBX5			RDMR	TRUE
909	cg20249252	7.06e-05	0.0510953	0.0689575	0.0527664	0.0161911	12	114852308	+	Island				DMR	TRUE
1274	cg14012033	0.000122565	0.0632611	0.040334	0.0302746	0.0100594	12	117319188	+	Island	HRK;HRK
2172	cg03848697	0.000288935	0.0874293	0.0167378	0.0133921	0.00334574	12	117537264	-	Island	TESC;TESC;TESC	high-CpG:116021532-116021685
923	cg21642206	7.21e-05	0.0512108	0.845588	0.882025	-0.0364377	12	120017161	+	OpenSea
740	cg11935476	5.14e-05	0.0456704	0.941655	0.952107	-0.0104512	12	120530625	+	N_Shelf	CCDC64
259	cg02577078	9.85e-06	0.024908	0.715157	0.78726	-0.0721031	12	121092968	-	OpenSea	CABP1;CABP1;CABP1
2131	cg12418163	0.000282357	0.0869799	0.0727235	0.0444384	0.0282851	12	121341616	+	Island	SPPL3
1702	cg15259691	0.000193924	0.0749069	0.0611797	0.0393265	0.0218532	12	121647698	+	N_Shore	P2RX4;P2RX4;P2RX4;P2RX4;P2RX4;P2RX4;P2RX4;P2RX4;P2RX4;P2RX4
1913	cg12893361	0.000233993	0.0803974	0.0361012	0.0296671	0.00643413	12	122124854	+	Island			chr12:122124782-122124782
2379	cg25699593	0.000323685	0.0894679	0.0135874	0.011078	0.00250937	12	122231642	+	Island	RHOF
2236	cg01400952	0.000299732	0.0881459	0.0118047	0.00980482	0.00199984	12	122460473	-	OpenSea	BCL7A;BCL7A
2308	cg25574761	0.000313021	0.0891098	0.0133377	0.0114444	0.0018933	12	122688279	+	Island	B3GNT4;B3GNT4
1194	cg12800259	0.000109763	0.0604203	0.697687	0.643528	0.0541585	12	123007024	+	OpenSea	RSRC2;RSRC2;RSRC2;RSRC2
156	cg10279667	4.27e-06	0.0175502	0.608972	0.677693	-0.0687213	12	123043537	-	OpenSea	KNTC1
504	cg24828071	2.72e-05	0.0355055	0.876859	0.917612	-0.0407531	12	123128962	+	OpenSea
1188	cg24705741	0.000108808	0.0601829	0.0226512	0.0185148	0.00413643	12	123635215	+	Island
1895	cg20526432	0.000230003	0.0798092	0.681512	0.723823	-0.0423108	12	123925357	+	S_Shelf
2682	cg03983561	0.000395362	0.0968446	0.0141697	0.0120522	0.00211748	12	124086550	+	Island	DDX55
1406	cg13952636	0.000145312	0.0679605	0.0215264	0.0183744	0.00315194	12	124118264	+	Island	EIF2B1;GTF2H3;EIF2B1	high-CpG:122684085-122684238
2593	cg26427417	0.000375152	0.0951189	0.73458	0.787383	-0.0528028	12	124192819	+	N_Shelf	TCTN2;TCTN2
1307	cg27125645	0.000127885	0.0643409	0.0301793	0.0254564	0.00472293	12	124246434	+	N_Shore	DNAH10
2448	cg01224393	0.000339242	0.0911152	0.944728	0.966319	-0.0215908	12	124272266	-	Island	DNAH10
2396	cg16311883	0.000328511	0.0901581	0.555781	0.632993	-0.0772113	12	124481981	-	OpenSea	ZNF664				TRUE
587	cg11704463	3.42e-05	0.0383038	0.940482	0.957012	-0.0165309	12	124968399	+	OpenSea	NCOR2;NCOR2
619	cg19188370	3.71e-05	0.039321	0.774165	0.853359	-0.0791946	12	125103181	-	OpenSea
571	cg22944187	3.32e-05	0.0381564	0.789041	0.840554	-0.0515137	12	128306001	-	OpenSea
1962	cg18627442	0.000244211	0.0818478	0.946443	0.957695	-0.0112524	12	128899917	-	Island	TMEM132C
2751	cg19870125	0.000410631	0.0981299	0.737438	0.800883	-0.063445	12	129604022	+	OpenSea	TMEM132D
1963	cg03351713	0.000244368	0.0818566	0.726623	0.771336	-0.0447128	12	130866025	-	OpenSea
580	cg24390820	3.38e-05	0.0383038	0.782199	0.819299	-0.0371	12	131189380	+	S_Shore
2553	cg18193726	0.00036377	0.0936952	0.939269	0.946123	-0.00685424	12	131292130	+	OpenSea	STX2;STX2
534	cg22882539	3.02e-05	0.0371345	0.0455544	0.0395965	0.00595788	12	131438523	-	OpenSea	GPR133;GPR133	low-CpG:130004404-130004494
1321	cg04878869	0.000130815	0.0651174	0.840937	0.893753	-0.0528157	12	131917579	+	Island
650	cg17220960	4.02e-05	0.040682	0.922993	0.946807	-0.0238145	12	132284512	+	Island
2558	cg19693869	0.000365121	0.0938593	0.961652	0.967359	-0.00570725	12	132330383	+	S_Shore	MMP17
1735	cg07199894	0.000200159	0.0758607	0.431431	0.329354	0.102077	12	132379104	+	N_Shore	ULK1
1562	cg07341818	0.000171677	0.0722725	0.0263605	0.0227015	0.00365905	12	132379266	-	N_Shore	ULK1	high-CpG:130945072-130945237
863	cg15163603	6.56e-05	0.0499208	0.917701	0.941511	-0.0238103	12	132403897	-	OpenSea	ULK1
1725	cg17251152	0.0001984	0.0756299	0.104588	0.0722585	0.0323299	12	132434306	+	N_Shore	EP400
1181	cg25236904	0.00010645	0.0591738	0.0163172	0.0134064	0.00291077	12	132568643	-	Island	EP400NL
2024	cg01852522	0.00025776	0.0837184	0.897772	0.928968	-0.0311962	12	132686912	-	N_Shore	GALNT9;GALNT9
1902	cg12161887	0.000231047	0.0798754	0.680493	0.80803	-0.127537	12	132847907	+	Island	GALNT9
869	cg19325331	6.6e-05	0.0499208	0.832129	0.895103	-0.0629733	12	132849424	+	S_Shore	GALNT9
1533	cg24969187	0.000166828	0.0714025	0.933651	0.954016	-0.0203645	12	132870448	-	N_Shore	GALNT9
1026	cg14536812	8.45e-05	0.0541105	0.958391	0.963984	-0.00559381	12	132980631	-	N_Shelf
1909	cg20056593	0.000233126	0.0803019	0.936644	0.950027	-0.0133838	12	132993150	-	S_Shelf
2742	cg02905599	0.000409634	0.0981299	0.738177	0.793976	-0.0557982	12	133249096	-	N_Shore	POLE
1732	cg13492291	0.000199992	0.0758607	0.960869	0.970559	-0.00968985	12	133312126	+	S_Shore	ANKLE2
298	cg05207611	1.18e-05	0.0258903	0.795443	0.851244	-0.0558019	12	133333251	-	N_Shelf	ANKLE2
2397	cg16618634	0.000329491	0.0903658	0.0394367	0.0287182	0.0107184	12	133338725	-	Island	ANKLE2
45	cg15619333	5.06e-07	0.00708837	0.765323	0.824056	-0.0587329	12	133759653	-	S_Shore	ZNF268;ZNF268;ZNF268;ZNF268;ZNF268;ZNF268;ZNF268;ZNF268;ZNF268
2605	cg09559995	0.000377464	0.0951883	0.0238923	0.0202932	0.00359917	13	20207648	+	Island	MPHOSPH8
809	cg13475977	5.82e-05	0.0473418	0.930783	0.943892	-0.013109	13	21047397	-	OpenSea	CRYL1		chr13:21047390-21047390		TRUE
479	cg07132926	2.54e-05	0.0348363	0.573182	0.675372	-0.10219	13	21480411	-	S_Shelf
2685	cg21794428	0.000395507	0.0968446	0.0213775	0.0171167	0.00426078	13	21635420	+	Island	LATS2
518	cg24299873	2.85e-05	0.0360956	0.888792	0.913916	-0.0251237	13	21720464	+	OpenSea	SAP18
2146	cg22967319	0.000284123	0.0870414	0.6178	0.666591	-0.0487907	13	21807278	+	OpenSea	LINC01046
2007	cg04131736	0.000253102	0.0828918	0.0178256	0.0145637	0.00326188	13	22033638	-	Island	ZDHHC20;ZDHHC20;ZDHHC20;ZDHHC20
99	cg26015681	1.87e-06	0.0124014	0.516571	0.598922	-0.0823519	13	22329773	-	OpenSea					TRUE
732	cg18431324	5.04e-05	0.0453031	0.0264327	0.0230074	0.00342532	13	23949784	+	Island	SACS
2454	cg11250279	0.000340158	0.0911481	0.0162355	0.0136463	0.00258927	13	24463401	+	Island	C1QTNF9B-AS1;MIPEP;C1QTNF9B-AS1
1827	cg11334914	0.00021864	0.0785976	0.0426492	0.0335058	0.0091434	13	24553677	+	Island	SPATA13;SPATA13
924	cg10381113	7.21e-05	0.0512108	0.954122	0.969549	-0.0154275	13	24797136	+	OpenSea	SPATA13;SPATA13
516	cg12075849	2.84e-05	0.0360956	0.953498	0.966464	-0.0129666	13	25081063	-	OpenSea	PARP4
511	cg05719720	2.8e-05	0.0360111	0.0265503	0.021151	0.0053993	13	25254963	-	Island	ATP12A
1384	cg13986821	0.000142441	0.0675777	0.0181059	0.0162394	0.00186652	13	26828218	-	Island	CDK8
367	cg11428823	1.64e-05	0.0293849	0.831327	0.863837	-0.0325105	13	27593013	-	OpenSea
2226	cg18890751	0.000298012	0.0880095	0.0167547	0.0138431	0.00291168	13	28024809	-	Island	MTIF3;MTIF3;MTIF3;MTIF3
1153	cg13494229	0.000102916	0.0586942	0.611295	0.652253	-0.0409581	13	28681558	+	OpenSea
1973	cg16601590	0.000245821	0.0819283	0.748094	0.639942	0.108152	13	34782424	+	OpenSea					TRUE
1624	cg18348647	0.000182623	0.0738894	0.0232904	0.0198645	0.0034259	13	37006107	-	Island	CCNA1;CCNA1;CCNA1;CCNA1;CCNA1;CCNA1				TRUE
2531	cg13460389	0.000356147	0.092529	0.669716	0.717239	-0.0475221	13	41342941	-	N_Shelf	MRPS31
788	cg10909163	5.55e-05	0.0461814	0.0431753	0.0350598	0.00811549	13	41635251	+	Island	WBP4	high-CpG:40532929-40533657
1476	cg16110870	0.000157537	0.0699679	0.0281224	0.0240316	0.00409079	13	41635673	-	Island	WBP4	high-CpG:40533622-40533707
707	cg23416247	4.68e-05	0.0434389	0.0366766	0.0294348	0.00724173	13	42535382	-	Island	KIAA0564;KIAA0564
1435	cg16944820	0.000149654	0.0684932	0.0347036	0.0272049	0.00749866	13	45492071	-	OpenSea
1201	cg01367737	0.000110364	0.0604258	0.0293392	0.0240202	0.00531893	13	45563889	-	Island	NUFIP1;KIAA1704
1380	cg02279226	0.000141795	0.0675522	0.669655	0.713986	-0.0443309	13	49152283	+	OpenSea	LINC00462
2633	cg00758701	0.000384448	0.0960125	0.577899	0.71532	-0.137421	13	49879718	+	OpenSea
2518	cg09890241	0.000353533	0.0922645	0.0169575	0.0133397	0.00361781	13	51796281	+	N_Shore	FAM124A;FAM124A
1828	cg08028037	0.000218659	0.0785976	0.0247558	0.0183297	0.00642605	13	52027479	-	Island	INTS6;INTS6;INTS6	high-CpG:50925436-50925515
2542	cg14466075	0.0003595	0.092996	0.0299826	0.0257047	0.00427791	13	52703160	-	Island	NEK5
2005	cg10551809	0.000252803	0.0828864	0.619083	0.669994	-0.0509109	13	55408596	+	OpenSea					TRUE
1078	cg08344297	9.22e-05	0.0562157	0.948193	0.960133	-0.0119405	13	65500072	-	OpenSea
1442	cg06524757	0.000150241	0.0685004	0.091699	0.0737508	0.0179482	13	72441523	-	S_Shore	DACH1;DACH1;DACH1	high-CpG:71338558-71339558
943	cg15917241	7.4e-05	0.0515999	0.781211	0.8166	-0.0353887	13	79617519	-	OpenSea
139	cg27009091	3.44e-06	0.0161273	0.654279	0.720489	-0.0662101	13	83872859	-	OpenSea
1981	cg25457007	0.000248016	0.0822409	0.778629	0.80975	-0.0311211	13	87732961	+	OpenSea
1745	cg24399162	0.00020205	0.0761171	0.810927	0.857357	-0.0464302	13	98657512	-	OpenSea	IPO5
1943	cg08357012	0.000240768	0.081382	0.941519	0.953502	-0.011983	13	99090919	+	OpenSea	FARP1
613	cg22022001	3.65e-05	0.0391142	0.947487	0.959918	-0.0124311	13	99096806	-	OpenSea	FARP1
1170	cg11733266	0.000105531	0.0591738	0.883533	0.924531	-0.0409983	13	99096847	-	OpenSea	FARP1
1634	cg13147013	0.000184131	0.0740675	0.0188742	0.0162228	0.00265141	13	99852409	-	Island	UBAC2;UBAC2;UBAC2
2296	cg27461942	0.000310486	0.0889123	0.688029	0.747856	-0.0598272	13	100229148	+	OpenSea	LINC01039
472	cg17158649	2.49e-05	0.0346252	0.744188	0.789244	-0.0450561	13	100344193	+	OpenSea	CLYBL-AS2;CLYBL;CLYBL
1923	cg14684709	0.000235885	0.0806608	0.0311326	0.0267088	0.00442379	13	100547249	+	Island	CLYBL
561	cg27400447	3.24e-05	0.0379527	0.862031	0.880619	-0.0185872	13	100549017	+	S_Shore	CLYBL
1626	cg19815813	0.000182727	0.0738894	0.780136	0.847386	-0.06725	13	101186116	+	S_Shore	A2LD1
150	cg22958188	4e-06	0.0175357	0.936543	0.961517	-0.0249736	13	112238798	+	Island
1520	cg23107916	0.000163851	0.0708668	0.952475	0.955883	-0.00340781	13	112555972	+	OpenSea
129	cg02351840	2.76e-06	0.0139844	0.767652	0.843779	-0.0761268	13	112559707	-	OpenSea
344	cg02985139	1.51e-05	0.0287161	0.831081	0.895229	-0.0641481	13	112620260	+	OpenSea
1226	cg04047221	0.000113893	0.0610867	0.049193	0.0281251	0.0210679	13	112723477	+	Island	SOX1;SOX1			CDMR
1974	cg21719492	0.000245953	0.0819306	0.965728	0.970028	-0.0043003	13	112788669	-	OpenSea
1922	cg10421718	0.00023581	0.0806608	0.902204	0.928663	-0.026459	13	112906711	+	OpenSea
2508	cg22709985	0.000351965	0.0922645	0.914096	0.923601	-0.00950453	13	113199725	-	N_Shore	TUBGCP3
1208	cg27001137	0.000111613	0.0607562	0.771516	0.805347	-0.0338309	13	113455344	-	OpenSea	ATP11A;ATP11A
734	cg14001871	5.06e-05	0.0453563	0.777577	0.845862	-0.0682849	13	113488290	+	S_Shore	ATP11A;ATP11A
1027	cg00141447	8.45e-05	0.0541105	0.85962	0.89068	-0.0310596	13	113544658	-	N_Shelf
1068	cg11545340	9.06e-05	0.0557963	0.0250164	0.0198166	0.00519982	13	113951608	+	Island	LAMP1;LAMP1	high-CpG:112999406-112999789
2750	cg12648691	0.000410569	0.0981299	0.82766	0.847478	-0.0198186	13	114019684	+	Island	GRTP1
1003	cg10872847	8.08e-05	0.0529987	0.922903	0.940492	-0.0175885	13	114310925	-	OpenSea	ATP4B
2369	cg15471063	0.000321538	0.08925	0.970649	0.977915	-0.00726662	13	114313414	+	OpenSea	ATP4B
2864	cg20009378	0.000434499	0.0997432	0.977363	0.980635	-0.00327209	13	114325829	+	OpenSea	GRK1
1685	cg00427150	0.000191772	0.074708	0.909941	0.948369	-0.0384281	13	114770568	-	N_Shelf	RASA3
2100	cg13818243	0.000275705	0.0863308	0.913752	0.93179	-0.0180378	13	114789734	+	S_Shelf	RASA3
1838	cg20028528	0.000220035	0.0786595	0.900603	0.924694	-0.0240915	13	114812184	-	N_Shore	RASA3
1248	cg21364828	0.00011817	0.0622402	0.898126	0.929129	-0.0310025	13	114825608	-	OpenSea	RASA3
1255	cg04421280	0.000119928	0.0628373	0.0215576	0.0166721	0.00488556	13	114898225	-	Island	RASA3
191	cg13494121	5.79e-06	0.0199317	0.79831	0.842969	-0.0446587	13	114956266	+	OpenSea
2737	cg16037096	0.000408764	0.0981299	0.0198405	0.0170107	0.00282988	14	20881764	-	Island	TEP1
1065	cg00898190	9.04e-05	0.0557857	0.747248	0.786425	-0.0391771	14	22941183	+	OpenSea					TRUE
2525	cg00699996	0.000355213	0.0924763	0.550661	0.603009	-0.0523482	14	23298687	+	N_Shore	MRPL52;MRPL52;MRPL52;MRPL52;MRPL52;MRPL52
2779	cg16512711	0.00041588	0.0983804	0.808156	0.777469	0.030687	14	26642348	+	OpenSea
531	cg25950438	2.97e-05	0.0368003	0.490591	0.587846	-0.0972547	14	34077154	-	OpenSea	NPAS3;NPAS3;NPAS3;NPAS3
1768	cg00179087	0.000208039	0.0773755	0.022272	0.0170577	0.00521433	14	35183881	-	Island	CFL2;CFL2;CFL2;CFL2;CFL2;CFL2	high-CpG:34253473-34253767
22	cg09453280	1.62e-07	0.0048394	0.811745	0.866062	-0.054317	14	35403910	-	OpenSea
1613	cg14007757	0.000180072	0.0734098	0.0128429	0.0105369	0.00230599	14	37116408	-	Island				DMR	TRUE
2850	cg01021196	0.000430373	0.0992983	0.766562	0.865841	-0.0992785	14	38340164	+	OpenSea					TRUE
1389	cg07484315	0.000142937	0.0675777	0.0287173	0.024328	0.00438926	14	39572299	+	Island	SEC23A;SEC23A	high-CpG:38641959-38642203
2659	cg03858239	0.000391423	0.0967617	0.0238251	0.0200623	0.00376273	14	39736272	-	Island	CTAGE5;CTAGE5;CTAGE5;CTAGE5;CTAGE5;CTAGE5;LOC100288846;CTAGE5	high-CpG:38805622-38806360
486	cg21526847	2.58e-05	0.0348363	0.0372391	0.0276485	0.00959059	14	42075664	-	N_Shore	LRFN5		chr14:42075138-42075138	CDMR
692	cg02082203	4.5e-05	0.0427519	0.0267431	0.023165	0.00357806	14	45431795	+	Island	KLHL28;FAM179B
1098	cg18631948	9.56e-05	0.0572475	0.0133039	0.0116999	0.00160399	14	45605353	-	Island	FANCM
[truncated: 875 more rows]

## Sheet: Sup Table 2 MethylGometh
Supplementary Table S2. Pathway enrichment analysis
	Description	Gene Ontology	Size	p-value	p-adjustedα	ID
GO:0043161	BP	proteasome-mediated ubiquitin-dependent protein catabolic process	133	3.57e-08	0.000126646	GO:0043161
GO:0015629	CC	actin cytoskeleton	192	7.84e-07	0.00104628	GO:0015629
GO:0044212	MF	transcription regulatory region DNA binding	174	8.84e-07	0.00104628	GO:0044212
GO:0000790	CC	nuclear chromatin	167	1.72e-06	0.00126011	GO:0000790
GO:0005929	CC	cilium	187	1.78e-06	0.00126011	GO:0005929
GO:0008022	MF	protein C-terminus binding	186	2.15e-06	0.00127429	GO:0008022
GO:0016055	BP	Wnt signaling pathway	179	2.6e-06	0.00129986	GO:0016055
GO:0030496	CC	midbody	154	2.93e-06	0.00129986	GO:0030496
GO:0090090	BP	negative regulation of canonical Wnt signaling pathway	166	1e-05	0.00394598	GO:0090090
GO:1900034	BP	regulation of cellular response to heat	77	1.17e-05	0.00416302	GO:1900034
GO:0007420	BP	brain development	184	1.41e-05	0.00436971	GO:0007420
GO:0015630	CC	microtubule cytoskeleton	122	1.48e-05	0.00436971	GO:0015630
GO:0048013	BP	ephrin receptor signaling pathway	85	2.46e-05	0.00620233	GO:0048013
GO:0007411	BP	axon guidance	164	2.54e-05	0.00620233	GO:0007411
GO:0031146	BP	SCF-dependent proteasomal ubiquitin-dependent protein catabolic process	68	2.82e-05	0.00620233	GO:0031146
GO:0000977	MF	RNA polymerase II regulatory region sequence-specific DNA binding	162	2.89e-05	0.00620233	GO:0000977
GO:0007507	BP	heart development	167	2.97e-05	0.00620233	GO:0007507
GO:0007030	BP	Golgi organization	65	3.97e-05	0.00781926	GO:0007030
GO:0070498	BP	interleukin-1-mediated signaling pathway	97	4.3e-05	0.00802264	GO:0070498
GO:0007605	BP	sensory perception of sound	131	4.53e-05	0.00804088	GO:0007605
GO:0060071	BP	Wnt signaling pathway, planar cell polarity pathway	88	5.22e-05	0.00881611	GO:0060071
GO:0016925	BP	protein sumoylation	62	8.92e-05	0.0133403	GO:0016925
GO:0090263	BP	positive regulation of canonical Wnt signaling pathway	132	9.07e-05	0.0133403	GO:0090263
GO:0043197	CC	dendritic spine	123	9.24e-05	0.0133403	GO:0043197
GO:0035264	BP	multicellular organism growth	86	9.4e-05	0.0133403	GO:0035264
GO:0000086	BP	G2/M transition of mitotic cell cycle	126	9.79e-05	0.0133672	GO:0000086
GO:0018108	BP	peptidyl-tyrosine phosphorylation	120	0.000115616	0.0147587	GO:0018108
GO:0030027	CC	lamellipodium	175	0.00011644	0.0147587	GO:0030027
GO:0060271	BP	cilium assembly	152	0.000147678	0.0176259	GO:0060271
GO:0016236	BP	macroautophagy	90	0.000148993	0.0176259	GO:0016236
GO:0051087	MF	chaperone binding	91	0.000166164	0.0189252	GO:0051087
GO:0043130	MF	ubiquitin binding	53	0.000175167	0.0189252	GO:0043130
GO:0006351	BP	transcription, DNA-templated	101	0.000181252	0.0189252	GO:0006351
GO:0006110	BP	regulation of glycolytic process	41	0.000181653	0.0189252	GO:0006110
GO:0045815	BP	positive regulation of gene expression, epigenetic	32	0.000186639	0.0189252	GO:0045815
GO:0001933	BP	negative regulation of protein phosphorylation	72	0.000199025	0.0195784	GO:0001933
GO:0006281	BP	DNA repair	194	0.000207211	0.0195784	GO:0006281
GO:1990830	BP	cellular response to leukemia inhibitory factor	94	0.00020963	0.0195784	GO:1990830
GO:0005667	CC	transcription factor complex	145	0.000222347	0.020213	GO:0005667
GO:0010976	BP	positive regulation of neuron projection development	105	0.000228845	0.020213	GO:0010976
GO:0050821	BP	protein stabilization	171	0.000240727	0.020213	GO:0050821
GO:0045202	CC	synapse	177	0.000243009	0.020213	GO:0045202
GO:0000922	CC	spindle pole	112	0.000244903	0.020213	GO:0000922
GO:0030426	CC	growth cone	124	0.000254971	0.0205658	GO:0030426
GO:0001650	CC	fibrillar center	131	0.000273379	0.0215605	GO:0001650
GO:1901796	BP	regulation of signal transduction by p53 class mediator	131	0.000285227	0.0215767	GO:1901796
GO:0060021	BP	roof of mouth development	62	0.000285744	0.0215767	GO:0060021
GO:0070936	BP	protein K48-linked ubiquitination	52	0.000295295	0.0218333	GO:0070936
GO:0045665	BP	negative regulation of neuron differentiation	54	0.000310051	0.0224565	GO:0045665
GO:0007050	BP	cell cycle arrest	128	0.000348387	0.0247285	GO:0007050
GO:0005635	CC	nuclear envelope	161	0.000419017	0.0286801	GO:0005635
GO:0000784	CC	nuclear chromosome, telomeric region	120	0.000427871	0.0286801	GO:0000784
GO:0001843	BP	neural tube closure	76	0.000428302	0.0286801	GO:0001843
GO:0006406	BP	mRNA export from nucleus	99	0.000503216	0.0330725	GO:0006406
GO:0032587	CC	ruffle membrane	91	0.000595806	0.0376112	GO:0032587
GO:0045444	BP	fat cell differentiation	69	0.000598651	0.0376112	GO:0045444
GO:1902036	BP	regulation of hematopoietic stem cell differentiation	68	0.000604069	0.0376112	GO:1902036
GO:0035115	BP	embryonic forelimb morphogenesis	33	0.000626456	0.0383326	GO:0035115
GO:0001756	BP	somitogenesis	39	0.000702064	0.042231	GO:0001756
GO:0038128	BP	ERBB2 signaling pathway	31	0.000752228	0.0438961	GO:0038128
GO:0072686	CC	mitotic spindle	66	0.000761927	0.0438961	GO:0072686
GO:0006457	BP	protein folding	123	0.000767097	0.0438961	GO:0006457
GO:0032154	CC	cleavage furrow	54	0.000780546	0.0438961	GO:0032154
GO:0005815	CC	microtubule organizing center	142	0.000791589	0.0438961	GO:0005815
GO:0048701	BP	embryonic cranial skeleton morphogenesis	32	0.000821789	0.0440601	GO:0048701
GO:0005819	CC	spindle	114	0.000835532	0.0440601	GO:0005819
GO:0000724	BP	double-strand break repair via homologous recombination	72	0.000845377	0.0440601	GO:0000724
GO:1990904	CC	ribonucleoprotein complex	104	0.000849782	0.0440601	GO:1990904
GO:0006260	BP	DNA replication	129	0.000875608	0.0440601	GO:0006260
GO:0016477	BP	cell migration	147	0.000882758	0.0440601	GO:0016477
GO:0001822	BP	kidney development	91	0.00089065	0.0440601	GO:0001822
GO:0097546	CC	ciliary base	29	0.00090835	0.0440601	GO:0097546
GO:0061418	BP	regulation of transcription from RNA polymerase II promoter in response to hypoxia	71	0.000909953	0.0440601	GO:0061418
GO:0043524	BP	negative regulation of neuron apoptotic process	138	0.000918694	0.0440601	GO:0043524
GO:0008380	BP	RNA splicing	143	0.000942607	0.0446042	GO:0008380
GO:0005770	CC	late endosome	120	0.000979848	0.0447378	GO:0005770
GO:0099061	CC	integral component of postsynaptic density membrane	48	0.000981897	0.0447378	GO:0099061
GO:0006383	BP	transcription by RNA polymerase III	33	0.000990102	0.0447378	GO:0006383
GO:0001541	BP	ovarian follicle development	38	0.000995855	0.0447378	GO:0001541
GO:0042795	BP	snRNA transcription by RNA polymerase II	70	0.00102977	0.0456832	GO:0042795
GO:0006890	BP	retrograde vesicle-mediated transport, Golgi to ER	74	0.00104698	0.0458734	GO:0006890
GO:0048705	BP	skeletal system morphogenesis	29	0.00110983	0.0475697	GO:0048705
GO:0005694	CC	chromosome	113	0.00111359	0.0475697	GO:0005694
GO:0001649	BP	osteoblast differentiation	104	0.00112591	0.0475697	GO:0001649
GO:0008013	MF	beta-catenin binding	78	0.00115512	0.0479226	GO:0008013
GO:0019083	BP	viral transcription	109	0.00116613	0.0479226	GO:0019083
GO:0000723	BP	telomere maintenance	35	0.00118507	0.0479226	GO:0000723
GO:0005814	CC	centriole	124	0.00118827	0.0479226	GO:0005814
GO:0051056	BP	regulation of small GTPase mediated signal transduction	141	0.00123731	0.0493394	GO:0051056
GO:0043928	BP	exonucleolytic nuclear-transcribed mRNA catabolic process involved in deadenylation-dependent decay	33	0.00126895	0.0494528	GO:0043928
GO:0006361	BP	transcription initiation from RNA polymerase I promoter	31	0.0012715	0.0494528	GO:0006361
GO:0045765	BP	regulation of angiogenesis	28	0.00128195	0.0494528	GO:0045765
GO:0031145	BP	anaphase-promoting complex-dependent catabolic process	81	0.00129618	0.0494639	GO:0031145
GO:0030036	BP	actin cytoskeleton organization	111	0.00131091	0.049494	GO:0030036
GO:0006888	BP	ER to Golgi vesicle-mediated transport	144	0.00132596	0.0495353	GO:0006888
GO:0030672	CC	synaptic vesicle membrane	48	0.00135423	0.0500643	GO:0030672
GO:0016605	CC	PML body	99	0.00139659	0.0510035	GO:0016605
GO:0075733	BP	intracellular transport of virus	50	0.00140838	0.0510035	GO:0075733
GO:0097711	BP	ciliary basal body-plasma membrane docking	95	0.0014247	0.0510734	GO:0097711
GO:0030308	BP	negative regulation of cell growth	122	0.00144073	0.0510944	GO:0030308
GO:1904837	BP	beta-catenin-TCF complex assembly	29	0.00147388	0.0510944	GO:1904837
GO:0030324	BP	lung development	79	0.00147393	0.0510944	GO:0030324
GO:0000278	BP	mitotic cell cycle	90	0.00148635	0.0510944	GO:0000278
GO:0008017	MF	microtubule binding	157	0.00149727	0.0510944	GO:0008017
GO:0061630	MF	ubiquitin protein ligase activity	136	0.0015939	0.0538738	GO:0061630
GO:0060548	BP	negative regulation of cell death	51	0.00165784	0.055254	GO:0060548
GO:0006363	BP	termination of RNA polymerase I transcription	30	0.00167829	0.055254	GO:0006363
GO:0005793	CC	endoplasmic reticulum-Golgi intermediate compartment	64	0.00168144	0.055254	GO:0005793
GO:0071364	BP	cellular response to epidermal growth factor stimulus	43	0.00171603	0.0558734	GO:0071364
GO:0001657	BP	ureteric bud development	37	0.00175306	0.0565602	GO:0001657
GO:0043657	CC	host cell	55	0.00185138	0.0591942	GO:0043657
GO:0007409	BP	axonogenesis	62	0.00192756	0.0606492	GO:0007409
GO:0034446	BP	substrate adhesion-dependent cell spreading	38	0.00194622	0.0606492	GO:0034446
GO:0002039	MF	p53 binding	65	0.00194816	0.0606492	GO:0002039
GO:0000785	CC	chromatin	90	0.00212357	0.0635033	GO:0000785
GO:0051082	MF	unfolded protein binding	83	0.00213431	0.0635033	GO:0051082
GO:0006409	BP	tRNA export from nucleus	33	0.00213661	0.0635033	GO:0006409
GO:0006362	BP	transcription elongation from RNA polymerase I promoter	29	0.00215498	0.0635033	GO:0006362
GO:1901990	BP	regulation of mitotic cell cycle phase transition	80	0.00216811	0.0635033	GO:1901990
GO:0008021	CC	synaptic vesicle	87	0.00217472	0.0635033	GO:0008021
GO:0070125	BP	mitochondrial translational elongation	86	0.00218074	0.0635033	GO:0070125
GO:0034198	BP	cellular response to amino acid starvation	42	0.00218298	0.0635033	GO:0034198
GO:0042981	BP	regulation of apoptotic process	154	0.00220436	0.0636038	GO:0042981
GO:0034599	BP	cellular response to oxidative stress	87	0.00230459	0.0659596	GO:0034599
GO:0030165	MF	PDZ domain binding	79	0.00238608	0.0677456	GO:0030165
GO:0046777	BP	protein autophosphorylation	164	0.00242502	0.0683048	GO:0046777
GO:0036064	CC	ciliary basal body	109	0.00251547	0.0701585	GO:0036064
GO:0006521	BP	regulation of cellular amino acid metabolic process	51	0.00254753	0.0701585	GO:0006521
GO:0050681	MF	androgen receptor binding	44	0.00256118	0.0701585	GO:0050681
GO:0003697	MF	single-stranded DNA binding	82	0.00256991	0.0701585	GO:0003697
GO:0042393	MF	histone binding	99	0.00264875	0.0713743	GO:0042393
GO:0007040	BP	lysosome organization	34	0.00266839	0.0713743	GO:0007040
GO:0042826	MF	histone deacetylase binding	102	0.00267478	0.0713743	GO:0042826
GO:0051149	BP	positive regulation of muscle cell differentiation	25	0.00278695	0.0738125	GO:0051149
GO:0021510	BP	spinal cord development	32	0.00291861	0.0767269	GO:0021510
GO:0071300	BP	cellular response to retinoic acid	65	0.00313346	0.0817695	GO:0071300
GO:0005516	MF	calmodulin binding	168	0.00319268	0.0827067	GO:0005516
GO:0098685	CC	Schaffer collateral - CA1 synapse	82	0.00326868	0.0840533	GO:0098685
GO:0030659	CC	cytoplasmic vesicle membrane	133	0.00331727	0.0840533	GO:0030659
GO:0045184	BP	establishment of protein localization	39	0.00331875	0.0840533	GO:0045184
GO:0006367	BP	transcription initiation from RNA polymerase II promoter	161	0.0033394	0.0840533	GO:0006367
GO:0032391	CC	photoreceptor connecting cilium	36	0.0033665	0.0841387	GO:0032391
GO:0031966	CC	mitochondrial membrane	88	0.00351762	0.0872479	GO:0031966
GO:0030133	CC	transport vesicle	89	0.00354007	0.0872479	GO:0030133
GO:0018105	BP	peptidyl-serine phosphorylation	105	0.00360042	0.0879884	GO:0018105
GO:0005938	CC	cell cortex	111	0.0036197	0.0879884	GO:0005938
GO:0036258	BP	multivesicular body assembly	30	0.00370933	0.0895538	GO:0036258
GO:0031902	CC	late endosome membrane	110	0.00378742	0.0905515	GO:0031902
GO:0000082	BP	G1/S transition of mitotic cell cycle	95	0.00380168	0.0905515	GO:0000082
GO:0034644	BP	cellular response to UV	51	0.00385711	0.0912593	GO:0034644
GO:0010389	BP	regulation of G2/M transition of mitotic cell cycle	79	0.00396652	0.0932262	GO:0010389
GO:0017148	BP	negative regulation of translation	61	0.00401714	0.093795	GO:0017148
GO:0072659	BP	protein localization to plasma membrane	125	0.00406276	0.0942402	GO:0072659
GO:0032092	BP	positive regulation of protein binding	67	0.0041987	0.0955727	GO:0032092
GO:0006298	BP	mismatch repair	22	0.00421917	0.0955727	GO:0006298
GO:0044325	MF	ion channel binding	116	0.00422116	0.0955727	GO:0044325
GO:0006470	BP	protein dephosphorylation	127	0.00422793	0.0955727	GO:0006470
GO:0009952	BP	anterior/posterior pattern specification	62	0.00425988	0.0956855	GO:0009952
GO:1990090	BP	cellular response to nerve growth factor stimulus	33	0.0042944	0.0958543	GO:1990090
GO:0090316	BP	positive regulation of intracellular protein transport	22	0.00435728	0.0966499	GO:0090316
GO:0006364	BP	rRNA processing	124	0.00451498	0.0989645	GO:0006364
GO:0006338	BP	chromatin remodeling	80	0.0045174	0.0989645	GO:0006338
GO:0031124	BP	mRNA 3'-end processing	55	0.0047198	0.102043	GO:0031124
GO:0031016	BP	pancreas development	23	0.0047211	0.102043	GO:0031016
GO:0030176	CC	integral component of endoplasmic reticulum membrane	80	0.00481776	0.102043	GO:0030176
GO:0043488	BP	regulation of mRNA stability	106	0.00482935	0.102043	GO:0043488
GO:0006606	BP	protein import into nucleus	45	0.00484352	0.102043	GO:0006606
GO:0005604	CC	basement membrane	85	0.00484737	0.102043	GO:0005604
GO:0006886	BP	intracellular protein transport	126	0.00485918	0.102043	GO:0006886
GO:0045739	BP	positive regulation of DNA repair	29	0.00506249	0.105687	GO:0045739
GO:0000781	CC	chromosome, telomeric region	50	0.00517016	0.107303	GO:0000781
GO:0002053	BP	positive regulation of mesenchymal cell proliferation	24	0.0056342	0.115093	GO:0002053
GO:0042752	BP	regulation of circadian rhythm	65	0.00565551	0.115093	GO:0042752
GO:0060041	BP	retina development in camera-type eye	54	0.00573318	0.115093	GO:0060041
GO:0051117	MF	ATPase binding	77	0.00574919	0.115093	GO:0051117
GO:0030900	BP	forebrain development	45	0.00576696	0.115093	GO:0030900
GO:0000776	CC	kinetochore	84	0.00587646	0.115093	GO:0000776
GO:0097150	BP	neuronal stem cell population maintenance	23	0.00587778	0.115093	GO:0097150
GO:0006368	BP	transcription elongation from RNA polymerase II promoter	69	0.0058779	0.115093	GO:0006368
GO:0001889	BP	liver development	70	0.00589011	0.115093	GO:0001889
GO:0000502	CC	proteasome complex	54	0.00590618	0.115093	GO:0000502
GO:0007264	BP	small GTPase mediated signal transduction	72	0.00595277	0.115093	GO:0007264
GO:0001947	BP	heart looping	58	0.00597414	0.115093	GO:0001947
GO:0030032	BP	lamellipodium assembly	31	0.00599411	0.115093	GO:0030032
GO:0018107	BP	peptidyl-threonine phosphorylation	49	0.00603744	0.115093	GO:0018107
GO:0055037	CC	recycling endosome	104	0.0060461	0.115093	GO:0055037
GO:0016363	CC	nuclear matrix	106	0.00606435	0.115093	GO:0016363
GO:0070131	BP	positive regulation of mitochondrial translation	17	0.00615774	0.116244	GO:0070131
GO:0045785	BP	positive regulation of cell adhesion	47	0.00623087	0.117002	GO:0045785
GO:0021766	BP	hippocampus development	63	0.00631854	0.117289	GO:0021766
GO:0048714	BP	positive regulation of oligodendrocyte differentiation	22	0.00636417	0.117289	GO:0048714
GO:0043552	BP	positive regulation of phosphatidylinositol 3-kinase activity	30	0.00637329	0.117289	GO:0043552
GO:0000281	BP	mitotic cytokinesis	48	0.00639186	0.117289	GO:0000281
GO:1903561	CC	extracellular vesicle	55	0.00643992	0.117289	GO:1903561
GO:0016241	BP	regulation of macroautophagy	70	0.00644443	0.117289	GO:0016241
GO:0042733	BP	embryonic digit morphogenesis	56	0.00648659	0.117454	GO:0042733
GO:0008092	MF	cytoskeletal protein binding	45	0.00653993	0.117469	GO:0008092
GO:0042493	BP	response to drug	189	0.00655366	0.117469	GO:0042493
GO:0006633	BP	fatty acid biosynthetic process	30	0.00667615	0.118733	GO:0006633
GO:0019894	MF	kinesin binding	40	0.00669281	0.118733	GO:0019894
GO:0031397	BP	negative regulation of protein ubiquitination	52	0.0067245	0.118733	GO:0031397
GO:0005801	CC	cis-Golgi network	36	0.0067817	0.11915	GO:0005801
GO:0043010	BP	camera-type eye development	42	0.00685682	0.119455	GO:0043010
GO:0033138	BP	positive regulation of peptidyl-serine phosphorylation	82	0.00686637	0.119455	GO:0033138
GO:0007269	BP	neurotransmitter secretion	45	0.00694729	0.119825	GO:0007269
GO:0000151	CC	ubiquitin ligase complex	89	0.00695517	0.119825	GO:0000151
GO:0030010	BP	establishment of cell polarity	33	0.00705519	0.120961	GO:0030010
GO:0004672	MF	protein kinase activity	186	0.00716324	0.122223	GO:0004672
GO:0043967	BP	histone H4 acetylation	30	0.00723379	0.122288	GO:0043967
GO:1904813	CC	ficolin-1-rich granule lumen	124	0.00723595	0.122288	GO:1904813
GO:0007179	BP	transforming growth factor beta receptor signaling pathway	92	0.00744157	0.124642	GO:0007179
GO:0001103	MF	RNA polymerase II repressing transcription factor binding	29	0.00747335	0.124642	GO:0001103
GO:0001666	BP	response to hypoxia	157	0.00748065	0.124642	GO:0001666
GO:0070888	MF	E-box binding	49	0.00771332	0.127717	GO:0070888
GO:2000145	BP	regulation of cell motility	29	0.00773713	0.127717	GO:2000145
GO:0000045	BP	autophagosome assembly	35	0.00782179	0.128516	GO:0000045
GO:0001701	BP	in utero embryonic development	168	0.00788133	0.128898	GO:0001701
GO:0031175	BP	neuron projection development	97	0.00795024	0.129428	GO:0031175
GO:0047485	MF	protein N-terminus binding	106	0.00801198	0.129838	GO:0047485
GO:0010506	BP	regulation of autophagy	57	0.00806317	0.129993	GO:0010506
GO:0070126	BP	mitochondrial translational termination	88	0.00813963	0.129993	GO:0070126
GO:0048156	MF	tau protein binding	45	0.00815521	0.129993	GO:0048156
GO:0032880	BP	regulation of protein localization	46	0.00817034	0.129993	GO:0032880
GO:0032436	BP	positive regulation of proteasomal ubiquitin-dependent protein catabolic process	59	0.00820468	0.129993	GO:0032436
GO:0005085	MF	guanyl-nucleotide exchange factor activity	93	0.00827609	0.130167	GO:0005085
GO:0006275	BP	regulation of DNA replication	19	0.00832303	0.130167	GO:0006275
GO:0035091	MF	phosphatidylinositol binding	69	0.0083399	0.130167	GO:0035091
GO:0048469	BP	cell maturation	37	0.008399	0.130167	GO:0048469
GO:0007098	BP	centrosome cycle	37	0.00839905	0.130167	GO:0007098
GO:0006977	BP	DNA damage response, signal transduction by p53 class mediator resulting in cell cycle arrest	56	0.00851888	0.130645	GO:0006977
GO:0050905	BP	neuromuscular process	19	0.00852567	0.130645	GO:0050905
GO:0005930	CC	axoneme	82	0.00857054	0.130645	GO:0005930
GO:0051897	BP	positive regulation of protein kinase B signaling	173	0.00857713	0.130645	GO:0051897
GO:0048754	BP	branching morphogenesis of an epithelial tube	21	0.00864982	0.130696	GO:0048754
GO:0008333	BP	endosome to lysosome transport	43	0.00865418	0.130696	GO:0008333
GO:0006302	BP	double-strand break repair	54	0.00876353	0.131787	GO:0006302
GO:0019985	BP	translesion synthesis	35	0.00895309	0.133493	GO:0019985
GO:0003151	BP	outflow tract morphogenesis	49	0.00895598	0.133493	GO:0003151
GO:0003684	MF	damaged DNA binding	53	0.00902374	0.133493	GO:0003684
GO:0036297	BP	interstrand cross-link repair	48	0.00904686	0.133493	GO:0036297
GO:0043005	CC	neuron projection	182	0.00906506	0.133493	GO:0043005
GO:0071479	BP	cellular response to ionizing radiation	33	0.0091222	0.133693	GO:0071479
GO:0000184	BP	nuclear-transcribed mRNA catabolic process, nonsense-mediated decay	115	0.00918901	0.133693	GO:0000184
GO:0006486	BP	protein glycosylation	69	0.00923984	0.133693	GO:0006486
GO:0006283	BP	transcription-coupled nucleotide-excision repair	73	0.00924948	0.133693	GO:0006283
GO:0006986	BP	response to unfolded protein	43	0.00926697	0.133693	GO:0006986
GO:0034976	BP	response to endoplasmic reticulum stress	68	0.00936489	0.134559	GO:0034976
GO:0050321	MF	tau-protein kinase activity	21	0.00953435	0.135592	GO:0050321
GO:0017124	MF	SH3 domain binding	122	0.00955112	0.135592	GO:0017124
GO:0006611	BP	protein export from nucleus	20	0.00955143	0.135592	GO:0006611
GO:0050767	BP	regulation of neurogenesis	19	0.00967735	0.136832	GO:0050767
GO:0017147	MF	Wnt-protein binding	27	0.00988197	0.139171	GO:0017147
GO:0005546	MF	phosphatidylinositol-4,5-bisphosphate binding	65	0.0100665	0.14088	GO:0005546
GO:0030544	MF	Hsp70 protein binding	41	0.0100827	0.14088	GO:0030544
GO:0005839	CC	proteasome core complex	18	0.0101894	0.141813	GO:0005839
GO:0006369	BP	termination of RNA polymerase II transcription	30	0.0103092	0.142058	GO:0006369
GO:0030097	BP	hemopoiesis	49	0.0103392	0.142058	GO:0030097
GO:0042383	CC	sarcolemma	87	0.0103421	0.142058	GO:0042383
GO:0006397	BP	mRNA processing	147	0.0103672	0.142058	GO:0006397
GO:0035335	BP	peptidyl-tyrosine dephosphorylation	99	0.0105353	0.143806	GO:0035335
GO:0045171	CC	intercellular bridge	59	0.0105848	0.143928	GO:0045171
GO:0035904	BP	aorta development	21	0.0106512	0.144279	GO:0035904
GO:0034504	BP	protein localization to nucleus	34	0.0109089	0.147101	GO:0034504
GO:0001707	BP	mesoderm formation	27	0.0109424	0.147101	GO:0001707
GO:0030332	MF	cyclin binding	28	0.0112202	0.150266	GO:0030332
GO:0043204	CC	perikaryon	127	0.0113429	0.151339	GO:0043204
GO:0006979	BP	response to oxidative stress	95	0.011488	0.152699	GO:0006979
GO:0031901	CC	early endosome membrane	146	0.0116078	0.152735	GO:0031901
GO:0048568	BP	embryonic organ development	20	0.0116398	0.152735	GO:0048568
GO:0019900	MF	kinase binding	90	0.0116805	0.152735	GO:0019900
GO:0035116	BP	embryonic hindlimb morphogenesis	27	0.011711	0.152735	GO:0035116
GO:0043392	BP	negative regulation of DNA binding	27	0.0117521	0.152735	GO:0043392
GO:0006413	BP	translational initiation	130	0.0117585	0.152735	GO:0006413
GO:0051090	BP	regulation of DNA-binding transcription factor activity	27	0.0117919	0.152735	GO:0051090
GO:0051973	BP	positive regulation of telomerase activity	34	0.0119406	0.154099	GO:0051973
GO:0001726	CC	ruffle	91	0.0121203	0.155537	GO:0001726
GO:0031641	BP	regulation of myelination	19	0.0121397	0.155537	GO:0031641
GO:0098794	CC	postsynapse	69	0.0121915	0.155639	GO:0098794
GO:0005637	CC	nuclear inner membrane	38	0.0123633	0.156091	GO:0005637
GO:0008585	BP	female gonad development	17	0.0124409	0.156091	GO:0008585
GO:0048663	BP	neuron fate commitment	18	0.0124488	0.156091	GO:0048663
GO:0070588	BP	calcium ion transmembrane transport	109	0.0124597	0.156091	GO:0070588
GO:0017053	CC	transcriptional repressor complex	52	0.0124755	0.156091	GO:0017053
GO:0045740	BP	positive regulation of DNA replication	25	0.0125015	0.156091	GO:0045740
GO:0065003	BP	protein-containing complex assembly	116	0.0125348	0.156091	GO:0065003
GO:0051721	MF	protein phosphatase 2A binding	29	0.0127373	0.158058	GO:0051721
GO:1901215	BP	negative regulation of neuron death	52	0.012871	0.158623	GO:1901215
GO:1903078	BP	positive regulation of protein localization to plasma membrane	51	0.012897	0.158623	GO:1903078
GO:0036464	CC	cytoplasmic ribonucleoprotein granule	66	0.0129169	0.158623	GO:0036464
GO:0003729	MF	mRNA binding	84	0.0132777	0.162491	GO:0003729
GO:0043393	BP	regulation of protein binding	19	0.0133875	0.162798	GO:0043393
GO:0000987	MF	proximal promoter sequence-specific DNA binding	31	0.0133945	0.162798	GO:0000987
GO:0007422	BP	peripheral nervous system development	19	0.0134755	0.163223	GO:0007422
GO:0030331	MF	estrogen receptor binding	41	0.0136647	0.164952	GO:0030331
GO:0006914	BP	autophagy	109	0.0137314	0.165196	GO:0006914
GO:0007286	BP	spermatid development	72	0.0138096	0.1654	GO:0007286
GO:0005762	CC	mitochondrial large ribosomal subunit	55	0.0138416	0.1654	GO:0005762
GO:0005901	CC	caveola	72	0.0139401	0.166018	GO:0005901
GO:0006614	BP	SRP-dependent cotranslational protein targeting to membrane	89	0.0141312	0.167731	GO:0006614
GO:0000079	BP	regulation of cyclin-dependent protein serine/threonine kinase activity	35	0.0144091	0.170091	GO:0000079
GO:0030326	BP	embryonic limb morphogenesis	36	0.0144258	0.170091	GO:0030326
GO:0031290	BP	retinal ganglion cell axon guidance	19	0.0145293	0.170743	GO:0031290
GO:0008536	MF	Ran GTPase binding	26	0.0146972	0.171775	GO:0008536
GO:0051015	MF	actin filament binding	143	0.0147336	0.171775	GO:0051015
GO:0030218	BP	erythrocyte differentiation	43	0.0147889	0.171775	GO:0030218
GO:0060070	BP	canonical Wnt signaling pathway	62	0.0148107	0.171775	GO:0060070
GO:1900182	BP	positive regulation of protein localization to nucleus	25	0.0148638	0.17183	GO:1900182
GO:0034656	BP	nucleobase-containing small molecule catabolic process	15	0.0151173	0.17326	GO:0034656
GO:0006897	BP	endocytosis	113	0.0151309	0.17326	GO:0006897
GO:0042769	BP	DNA damage response, detection of DNA damage	37	0.0151426	0.17326	GO:0042769
GO:0030177	BP	positive regulation of Wnt signaling pathway	35	0.0151828	0.17326	GO:0030177
GO:0097542	CC	ciliary tip	45	0.0152709	0.173706	GO:0097542
GO:0031648	BP	protein destabilization	46	0.015358	0.174139	GO:0031648
GO:0032456	BP	endocytic recycling	33	0.0154587	0.174723	GO:0032456
GO:0070507	BP	regulation of microtubule cytoskeleton organization	28	0.0161	0.181394	GO:0070507
GO:0045540	BP	regulation of cholesterol biosynthetic process	33	0.0162717	0.181649	GO:0045540
GO:0035050	BP	embryonic heart tube development	15	0.0162771	0.181649	GO:0035050
GO:0035735	BP	intraciliary transport involved in cilium assembly	40	0.0163407	0.181649	GO:0035735
GO:0014047	BP	glutamate secretion	28	0.0164452	0.181649	GO:0014047
GO:0060395	BP	SMAD protein signal transduction	32	0.0165721	0.181649	GO:0060395
GO:0003690	MF	double-stranded DNA binding	72	0.0166254	0.181649	GO:0003690
GO:0006412	BP	translation	165	0.0166462	0.181649	GO:0006412
GO:0090575	CC	RNA polymerase II transcription factor complex	46	0.0166791	0.181649	GO:0090575
GO:0042307	BP	positive regulation of protein import into nucleus	37	0.0166948	0.181649	GO:0042307
GO:0007368	BP	determination of left/right symmetry	55	0.0167035	0.181649	GO:0007368
GO:0051402	BP	neuron apoptotic process	38	0.0167206	0.181649	GO:0051402
GO:0098793	CC	presynapse	92	0.0167369	0.181649	GO:0098793
GO:0048557	BP	embryonic digestive tract morphogenesis	18	0.0171004	0.184356	GO:0048557
GO:0032465	BP	regulation of cytokinesis	36	0.0171028	0.184356	GO:0032465
GO:0050873	BP	brown fat cell differentiation	28	0.0171781	0.184356	GO:0050873
GO:0042475	BP	odontogenesis of dentin-containing tooth	55	0.0171941	0.184356	GO:0042475
GO:0001669	CC	acrosomal vesicle	82	0.0172789	0.184707	GO:0001669
GO:0030014	CC	CCR4-NOT complex	16	0.017357	0.184984	GO:0030014
GO:0000980	MF	RNA polymerase II distal enhancer sequence-specific DNA binding	87	0.0176532	0.187578	GO:0000980
GO:0070064	MF	proline-rich region binding	18	0.0178865	0.18949	GO:0070064
GO:0042149	BP	cellular response to glucose starvation	38	0.0180358	0.190504	GO:0042149
GO:0070300	MF	phosphatidic acid binding	18	0.0182361	0.192048	GO:0070300
GO:1904355	BP	positive regulation of telomere capping	17	0.0183465	0.192588	GO:1904355
GO:0048704	BP	embryonic skeletal system morphogenesis	34	0.018396	0.192588	GO:0048704
GO:0080025	MF	phosphatidylinositol-3,5-bisphosphate binding	25	0.0185035	0.193144	GO:0080025
GO:0000777	CC	condensed chromosome kinetochore	89	0.0186231	0.193822	GO:0000777
GO:0016887	MF	ATPase activity	116	0.0191006	0.196542	GO:0016887
GO:0000049	MF	tRNA binding	47	0.0191197	0.196542	GO:0000049
GO:0030214	BP	hyaluronan catabolic process	16	0.0191316	0.196542	GO:0030214
GO:0042472	BP	inner ear morphogenesis	54	0.0191559	0.196542	GO:0042472
GO:2000114	BP	regulation of establishment of cell polarity	18	0.0191613	0.196542	GO:2000114
GO:0005643	CC	nuclear pore	46	0.0192253	0.19663	GO:0005643
GO:0048041	BP	focal adhesion assembly	26	0.0193395	0.197229	GO:0048041
GO:0007569	BP	cell aging	25	0.0194189	0.197468	GO:0007569
GO:0043022	MF	ribosome binding	44	0.0194934	0.197468	GO:0043022
GO:0048666	BP	neuron development	41	0.0196631	0.197468	GO:0048666
GO:0061025	BP	membrane fusion	24	0.0196838	0.197468	GO:0061025
GO:0007059	BP	chromosome segregation	61	0.0197704	0.197468	GO:0007059
GO:0007219	BP	Notch signaling pathway	100	0.019794	0.197468	GO:0007219
GO:0030374	MF	nuclear receptor transcription coactivator activity	43	0.0197954	0.197468	GO:0030374
GO:0043044	BP	ATP-dependent chromatin remodeling	24	0.0198494	0.197468	GO:0043044
GO:0010972	BP	negative regulation of G2/M transition of mitotic cell cycle	58	0.0199155	0.197468	GO:0010972
GO:0004879	MF	nuclear receptor activity	46	0.0199193	0.197468	GO:0004879
GO:0097009	BP	energy homeostasis	34	0.0200777	0.198037	GO:0097009
GO:0007224	BP	smoothened signaling pathway	63	0.0201098	0.198037	GO:0007224
GO:0005844	CC	polysome	33	0.0201441	0.198037	GO:0005844
GO:0019058	BP	viral life cycle	30	0.0203048	0.199066	GO:0019058
GO:0035861	CC	site of double-strand break	51	0.0205004	0.200429	GO:0035861
GO:0048813	BP	dendrite morphogenesis	33	0.0205646	0.200505	GO:0048813
GO:0048010	BP	vascular endothelial growth factor receptor signaling pathway	64	0.0208846	0.203067	GO:0048010
GO:0032922	BP	circadian regulation of gene expression	61	0.021333	0.20686	GO:0032922
GO:0008643	BP	carbohydrate transport	22	0.0214649	0.207572	GO:0008643
GO:0097503	BP	sialylation	18	0.0215469	0.207799	GO:0097503
GO:0007346	BP	regulation of mitotic cell cycle	30	0.0216589	0.20782	GO:0007346
GO:0001837	BP	epithelial to mesenchymal transition	37	0.0216999	0.20782	GO:0001837
GO:0003730	MF	mRNA 3'-UTR binding	48	0.0217248	0.20782	GO:0003730
GO:0007051	BP	spindle organization	16	0.0220807	0.210127	GO:0007051
GO:0006513	BP	protein monoubiquitination	30	0.0220844	0.210127	GO:0006513
GO:0006464	BP	cellular protein modification process	86	0.0222648	0.211141	GO:0006464
GO:0005262	MF	calcium channel activity	38	0.0223656	0.211141	GO:0005262
GO:0035855	BP	megakaryocyte development	17	0.0224203	0.211141	GO:0035855
GO:0005689	CC	U12-type spliceosomal complex	24	0.0224289	0.211141	GO:0005689
GO:0005977	BP	glycogen metabolic process	27	0.0226378	0.212544	GO:0005977
GO:0048589	BP	developmental growth	23	0.022805	0.213172	GO:0048589
GO:0031011	CC	Ino80 complex	15	0.0228248	0.213172	GO:0031011
GO:0046330	BP	positive regulation of JNK cascade	66	0.0230149	0.214223	GO:0046330
GO:0008089	BP	anterograde axonal transport	28	0.0230581	0.214223	GO:0008089
GO:0006297	BP	nucleotide-excision repair, DNA gap filling	23	0.0232	0.214978	GO:0006297
GO:0038061	BP	NIK/NF-kappaB signaling	68	0.0232747	0.215109	GO:0038061
GO:0045666	BP	positive regulation of neuron differentiation	84	0.0233605	0.215342	GO:0045666
GO:0003148	BP	outflow tract septum morphogenesis	27	0.0235288	0.216331	GO:0003148
GO:0048844	BP	artery morphogenesis	23	0.0236621	0.216473	GO:0048844
GO:0001764	BP	neuron migration	106	0.0237125	0.216473	GO:0001764
GO:0042813	MF	Wnt-activated receptor activity	15	0.0237273	0.216473	GO:0042813
GO:0090314	BP	positive regulation of protein targeting to membrane	30	0.0239683	0.218112	GO:0090314
GO:0005913	CC	cell-cell adherens junction	65	0.0241268	0.218964	GO:0005913
GO:0022604	BP	regulation of cell morphogenesis	22	0.0241854	0.218964	GO:0022604
GO:0008543	BP	fibroblast growth factor receptor signaling pathway	78	0.0247114	0.223131	GO:0008543
GO:0030111	BP	regulation of Wnt signaling pathway	23	0.0247714	0.223131	GO:0030111
GO:0030145	MF	manganese ion binding	58	0.0248437	0.223216	GO:0030145
GO:2000737	BP	negative regulation of stem cell differentiation	15	0.0249149	0.22329	GO:2000737
GO:0005802	CC	trans-Golgi network	126	0.0250977	0.224275	GO:0005802
GO:0070830	BP	bicellular tight junction assembly	34	0.0251562	0.224275	GO:0070830
GO:0048538	BP	thymus development	44	0.0252556	0.224275	GO:0048538
GO:0007340	BP	acrosome reaction	14	0.0252839	0.224275	GO:0007340
GO:1901216	BP	positive regulation of neuron death	36	0.025347	0.224275	GO:1901216
GO:0010718	BP	positive regulation of epithelial to mesenchymal transition	46	0.025404	0.224275	GO:0010718
GO:0001709	BP	cell fate determination	17	0.0255247	0.224557	GO:0001709
GO:0060412	BP	ventricular septum morphogenesis	37	0.0255624	0.224557	GO:0060412
GO:0042995	CC	cell projection	77	0.0257375	0.225239	GO:0042995
GO:0016079	BP	synaptic vesicle exocytosis	16	0.0257669	0.225239	GO:0016079
GO:0046676	BP	negative regulation of insulin secretion	28	0.0258997	0.225461	GO:0046676
GO:0021542	BP	dentate gyrus development	15	0.0259194	0.225461	GO:0021542
GO:0010977	BP	negative regulation of neuron projection development	63	0.0261615	0.22701	GO:0010977
GO:0031647	BP	regulation of protein stability	74	0.0262575	0.227147	GO:0031647
GO:0046875	MF	ephrin receptor binding	25	0.0263052	0.227147	GO:0046875
GO:0003222	BP	ventricular trabecula myocardium morphogenesis	16	0.0265056	0.227471	GO:0003222
GO:1990381	MF	ubiquitin-specific protease binding	15	0.0265137	0.227471	GO:1990381
GO:0045211	CC	postsynaptic membrane	174	0.0265481	0.227471	GO:0045211
GO:0006997	BP	nucleus organization	21	0.0265991	0.227471	GO:0006997
GO:0050921	BP	positive regulation of chemotaxis	17	0.0267781	0.228451	GO:0050921
GO:0061512	BP	protein localization to cilium	23	0.0269765	0.229591	GO:0061512
GO:0001654	BP	eye development	32	0.0272989	0.23178	GO:0001654
GO:0004298	MF	threonine-type endopeptidase activity	21	0.0275568	0.233411	GO:0004298
GO:0048863	BP	stem cell differentiation	29	0.0276846	0.233935	GO:0048863
GO:0048665	BP	neuron fate specification	15	0.0279539	0.235585	GO:0048665
GO:0071013	CC	catalytic step 2 spliceosome	80	0.0280551	0.235585	GO:0071013
GO:0006378	BP	mRNA polyadenylation	20	0.0280791	0.235585	GO:0006378
GO:0007612	BP	learning	58	0.0281599	0.235625	GO:0007612
GO:0016197	BP	endosomal transport	68	0.0282165	0.235625	GO:0016197
GO:0001102	MF	RNA polymerase II activating transcription factor binding	37	0.0283573	0.236226	GO:0001102
GO:0040008	BP	regulation of growth	62	0.02846	0.236226	GO:0040008
GO:0060090	MF	molecular adaptor activity	42	0.0284882	0.236226	GO:0060090
GO:0032212	BP	positive regulation of telomere maintenance via telomerase	34	0.0286102	0.236685	GO:0032212
GO:0007041	BP	lysosomal transport	16	0.0289125	0.238182	GO:0007041
GO:0030182	BP	neuron differentiation	87	0.0289622	0.238182	GO:0030182
GO:0061001	BP	regulation of dendritic spine morphogenesis	15	0.0290503	0.238182	GO:0061001
GO:0004713	MF	protein tyrosine kinase activity	78	0.0290597	0.238182	GO:0004713
GO:0045737	BP	positive regulation of cyclin-dependent protein serine/threonine kinase activity	28	0.0292434	0.238877	GO:0045737
GO:0005681	CC	spliceosomal complex	72	0.0294928	0.238877	GO:0005681
GO:0032147	BP	activation of protein kinase activity	48	0.029503	0.238877	GO:0032147
GO:0048870	BP	cell motility	23	0.0296158	0.238877	GO:0048870
GO:0002244	BP	hematopoietic progenitor cell differentiation	54	0.0297118	0.238877	GO:0002244
GO:0042552	BP	myelination	42	0.0297714	0.238877	GO:0042552
GO:0030742	MF	GTP-dependent protein binding	22	0.0300164	0.238877	GO:0030742
GO:0016575	BP	histone deacetylation	22	0.0300179	0.238877	GO:0016575
GO:0004386	MF	helicase activity	71	0.0300298	0.238877	GO:0004386
GO:0032355	BP	response to estradiol	95	0.030153	0.238877	GO:0032355
GO:0071837	MF	HMG box domain binding	16	0.0301916	0.238877	GO:0071837
GO:0006325	BP	chromatin organization	121	0.0301942	0.238877	GO:0006325
GO:0042059	BP	negative regulation of epidermal growth factor receptor signaling pathway	34	0.0302191	0.238877	GO:0042059
GO:0005178	MF	integrin binding	111	0.0302239	0.238877	GO:0005178
GO:2000179	BP	positive regulation of neural precursor cell proliferation	21	0.0302521	0.238877	GO:2000179
GO:0006487	BP	protein N-linked glycosylation	21	0.0303319	0.238877	GO:0006487
GO:0098691	CC	dopaminergic synapse	14	0.030339	0.238877	GO:0098691
GO:0097718	MF	disordered domain specific binding	31	0.0303561	0.238877	GO:0097718
GO:0035326	MF	enhancer binding	15	0.0305953	0.239045	GO:0035326
GO:0097191	BP	extrinsic apoptotic signaling pathway	44	0.0306625	0.239045	GO:0097191
GO:0008320	MF	protein transmembrane transporter activity	10	0.0306689	0.239045	GO:0008320
GO:0001894	BP	tissue homeostasis	20	0.0306925	0.239045	GO:0001894
GO:0006417	BP	regulation of translation	51	0.030738	0.239045	GO:0006417
GO:0051457	BP	maintenance of protein location in nucleus	13	0.0307814	0.239045	GO:0051457
GO:0033683	BP	nucleotide-excision repair, DNA incision	38	0.0309286	0.239208	GO:0033683
GO:0042562	MF	hormone binding	11	0.0309719	0.239208	GO:0042562
GO:0090543	CC	Flemming body	28	0.0310047	0.239208	GO:0090543
GO:0001658	BP	branching involved in ureteric bud morphogenesis	43	0.0312479	0.240202	GO:0001658
GO:0005758	CC	mitochondrial intermembrane space	71	0.0312689	0.240202	GO:0005758
GO:0036498	BP	IRE1-mediated unfolded protein response	54	0.0315798	0.241829	GO:0036498
GO:0006939	BP	smooth muscle contraction	16	0.0316169	0.241829	GO:0006939
GO:0000729	BP	DNA double-strand break processing	15	0.031737	0.242075	GO:0000729
GO:0031490	MF	chromatin DNA binding	48	0.0317855	0.242075	GO:0031490
GO:0005095	MF	GTPase inhibitor activity	14	0.0318701	0.242199	GO:0005095
GO:0001656	BP	metanephros development	28	0.0320829	0.242427	GO:0001656
GO:0033137	BP	negative regulation of peptidyl-serine phosphorylation	25	0.0321737	0.242427	GO:0033137
GO:0042147	BP	retrograde transport, endosome to Golgi	62	0.0321844	0.242427	GO:0042147
GO:0035267	CC	NuA4 histone acetyltransferase complex	14	0.0322236	0.242427	GO:0035267
GO:1902017	BP	regulation of cilium assembly	20	0.0322417	0.242427	GO:1902017
GO:1903827	BP	regulation of cellular protein localization	15	0.0324346	0.243362	GO:1903827
GO:0009791	BP	post-embryonic development	70	0.0326264	0.244115	GO:0009791
GO:0042470	CC	melanosome	98	0.0326966	0.244115	GO:0042470
GO:0086091	BP	regulation of heart rate by cardiac conduction	36	0.032819	0.244115	GO:0086091
GO:0032543	BP	mitochondrial translation	22	0.0328725	0.244115	GO:0032543
GO:0017134	MF	fibroblast growth factor binding	21	0.0328788	0.244115	GO:0017134
GO:0050770	BP	regulation of axonogenesis	16	0.0329725	0.244299	GO:0050770
GO:0016791	MF	phosphatase activity	28	0.033097	0.244514	GO:0016791
GO:0045664	BP	regulation of neuron differentiation	15	0.0331674	0.244514	GO:0045664
GO:0016242	BP	negative regulation of macroautophagy	14	0.0332081	0.244514	GO:0016242
GO:0009954	BP	proximal/distal pattern formation	24	0.0333693	0.245192	GO:0009954
GO:0043195	CC	terminal bouton	35	0.0336684	0.246879	GO:0043195
GO:0050804	BP	modulation of chemical synaptic transmission	43	0.0337912	0.247268	GO:0050804
GO:0001938	BP	positive regulation of endothelial cell proliferation	67	0.0340204	0.248022	GO:0001938
GO:0035235	BP	ionotropic glutamate receptor signaling pathway	23	0.0340552	0.248022	GO:0035235
GO:0061024	BP	membrane organization	130	0.0341039	0.248022	GO:0061024
GO:0006402	BP	mRNA catabolic process	19	0.0342325	0.248055	GO:0006402
GO:0070534	BP	protein K63-linked ubiquitination	34	0.0342842	0.248055	GO:0070534
GO:0048148	BP	behavioral response to cocaine	14	0.0343182	0.248055	GO:0048148
GO:0007566	BP	embryo implantation	40	0.0345166	0.248809	GO:0007566
GO:0071363	BP	cellular response to growth factor stimulus	45	0.034679	0.248809	GO:0071363
GO:0001558	BP	regulation of cell growth	67	0.0346994	0.248809	GO:0001558
GO:0034709	CC	methylosome	12	0.0347028	0.248809	GO:0034709
GO:0061157	BP	mRNA destabilization	14	0.0348175	0.248893	GO:0061157
GO:0006296	BP	nucleotide-excision repair, DNA incision, 5'-to lesion	37	0.0349016	0.248893	GO:0006296
GO:0033147	BP	negative regulation of intracellular estrogen receptor signaling pathway	14	0.0349249	0.248893	GO:0033147
GO:0045727	BP	positive regulation of translation	68	0.0352869	0.250623	GO:0045727
GO:0007005	BP	mitochondrion organization	78	0.035341	0.250623	GO:0007005
GO:0008045	BP	motor neuron axon guidance	15	0.0353795	0.250623	GO:0008045
GO:0048715	BP	negative regulation of oligodendrocyte differentiation	13	0.0355948	0.251646	GO:0048715
GO:0090630	BP	activation of GTPase activity	47	0.0356909	0.251823	GO:0090630
GO:0098982	CC	GABA-ergic synapse	70	0.0358928	0.252224	GO:0098982
GO:0039702	BP	viral budding via host ESCRT complex	20	0.035956	0.252224	GO:0039702
GO:0006904	BP	vesicle docking involved in exocytosis	22	0.0359609	0.252224	GO:0006904
GO:0006418	BP	tRNA aminoacylation for protein translation	35	0.0362206	0.253544	GO:0006418
GO:0060441	BP	epithelial tube branching involved in lung morphogenesis	15	0.0363059	0.253641	GO:0060441
GO:0070412	MF	R-SMAD binding	23	0.0366574	0.255594	GO:0070412
GO:0042645	CC	mitochondrial nucleoid	42	0.0368275	0.256151	GO:0042645
GO:0061053	BP	somite development	14	0.0369921	0.256151	GO:0061053
GO:0006998	BP	nuclear envelope organization	14	0.0370356	0.256151	GO:0006998
GO:0010952	BP	positive regulation of peptidase activity	14	0.0370759	0.256151	GO:0010952
GO:0030521	BP	androgen receptor signaling pathway	34	0.0370982	0.256151	GO:0030521
GO:0033209	BP	tumor necrosis factor-mediated signaling pathway	115	0.0372628	0.256587	GO:0033209
GO:0043149	BP	stress fiber assembly	15	0.0373415	0.256587	GO:0043149
GO:0005905	CC	clathrin-coated pit	53	0.0373783	0.256587	GO:0005905
GO:0019003	MF	GDP binding	59	0.037561	0.257344	GO:0019003
GO:0008266	MF	poly(U) RNA binding	20	0.0376956	0.257768	GO:0008266
GO:0032469	BP	endoplasmic reticulum calcium ion homeostasis	14	0.0377737	0.257805	GO:0032469
GO:0005777	CC	peroxisome	100	0.037868	0.257953	GO:0005777
GO:0021987	BP	cerebral cortex development	62	0.0381986	0.258612	GO:0021987
GO:0007498	BP	mesoderm development	31	0.0382173	0.258612	GO:0007498
GO:0045746	BP	negative regulation of Notch signaling pathway	38	0.0382987	0.258612	GO:0045746
GO:0036459	MF	thiol-dependent ubiquitinyl hydrolase activity	53	0.0383545	0.258612	GO:0036459
GO:0042734	CC	presynaptic membrane	49	0.0383921	0.258612	GO:0042734
GO:0030325	BP	adrenal gland development	21	0.0384641	0.258612	GO:0030325
GO:0019005	CC	SCF ubiquitin ligase complex	35	0.0385332	0.258612	GO:0019005
GO:0014704	CC	intercalated disc	45	0.0385772	0.258612	GO:0014704
GO:0015631	MF	tubulin binding	43	0.0386349	0.258612	GO:0015631
GO:0043968	BP	histone H2A acetylation	13	0.0386935	0.258612	GO:0043968
GO:0007173	BP	epidermal growth factor receptor signaling pathway	46	0.0391676	0.261289	GO:0007173
GO:0042800	MF	histone methyltransferase activity (H3-K4 specific)	13	0.0394447	0.262644	GO:0042800
GO:0008138	MF	protein tyrosine/serine/threonine phosphatase activity	33	0.0395603	0.262921	GO:0008138
GO:0005911	CC	cell-cell junction	147	0.0397192	0.263099	GO:0005911
GO:0042692	BP	muscle cell differentiation	12	0.0397355	0.263099	GO:0042692
GO:0008631	BP	intrinsic apoptotic signaling pathway in response to oxidative stress	14	0.0398893	0.26343	GO:0008631
GO:0045663	BP	positive regulation of myoblast differentiation	19	0.039934	0.26343	GO:0045663
GO:0007093	BP	mitotic cell cycle checkpoint	31	0.0404049	0.266042	GO:0007093
GO:0032869	BP	cellular response to insulin stimulus	84	0.0408221	0.268292	GO:0032869
GO:0031624	MF	ubiquitin conjugating enzyme binding	14	0.0409427	0.268587	GO:0031624
GO:0016485	BP	protein processing	45	0.0414179	0.271204	GO:0016485
GO:0008334	BP	histone mRNA metabolic process	12	0.0420081	0.274257	GO:0008334
GO:0008053	BP	mitochondrial fusion	13	0.0420388	0.274257	GO:0008053
GO:2000300	BP	regulation of synaptic vesicle exocytosis	47	0.0426565	0.276839	GO:2000300
GO:0030198	BP	extracellular matrix organization	189	0.0426581	0.276839	GO:0030198
GO:0031224	CC	intrinsic component of membrane	12	0.0426686	0.276839	GO:0031224
GO:0007613	BP	memory	74	0.0427859	0.277093	GO:0007613
GO:0031234	CC	extrinsic component of cytoplasmic side of plasma membrane	46	0.0429323	0.277331	GO:0031234
GO:0051298	BP	centrosome duplication	13	0.0429789	0.277331	GO:0051298
GO:0051225	BP	spindle assembly	24	0.043123	0.277756	GO:0051225
GO:0048008	BP	platelet-derived growth factor receptor signaling pathway	28	0.0434225	0.278102	GO:0048008
GO:2001234	BP	negative regulation of apoptotic signaling pathway	27	0.043475	0.278102	GO:2001234
GO:0016310	BP	phosphorylation	92	0.0434853	0.278102	GO:0016310
GO:0034045	CC	phagophore assembly site membrane	14	0.0434902	0.278102	GO:0034045
GO:0071565	CC	nBAF complex	14	0.0436783	0.278231	GO:0071565
GO:0034774	CC	secretory granule lumen	115	0.0437381	0.278231	GO:0034774
GO:0042474	BP	middle ear morphogenesis	20	0.0437455	0.278231	GO:0042474
GO:0007628	BP	adult walking behavior	28	0.0439336	0.278927	GO:0007628
GO:0051865	BP	protein autoubiquitination	65	0.0441685	0.27959	GO:0051865
GO:2000377	BP	regulation of reactive oxygen species metabolic process	18	0.0441956	0.27959	GO:2000377
GO:0001932	BP	regulation of protein phosphorylation	41	0.0444503	0.280701	GO:0001932
GO:0006303	BP	double-strand break repair via nonhomologous end joining	61	0.0445485	0.280822	GO:0006303
GO:0008327	MF	methyl-CpG binding	19	0.044712	0.281353	GO:0008327
GO:0000242	CC	pericentriolar material	20	0.0449748	0.282473	GO:0000242
GO:0032580	CC	Golgi cisterna membrane	71	0.0450492	0.282473	GO:0032580
GO:0003007	BP	heart morphogenesis	34	0.0453836	0.283882	GO:0003007
GO:0001725	CC	stress fiber	56	0.045434	0.283882	GO:0001725
GO:0006744	BP	ubiquinone biosynthetic process	12	0.0456933	0.285001	GO:0006744
GO:0001784	MF	phosphotyrosine residue binding	37	0.0458677	0.285587	GO:0001784
GO:0033613	MF	activating transcription factor binding	28	0.0461633	0.286924	GO:0033613
GO:1904668	BP	positive regulation of ubiquitin protein ligase activity	12	0.0463214	0.286936	GO:1904668
GO:0031072	MF	heat shock protein binding	51	0.046327	0.286936	GO:0031072
GO:0045668	BP	negative regulation of osteoblast differentiation	51	0.0468305	0.289008	GO:0045668
GO:0032201	BP	telomere maintenance via semi-conservative replication	24	0.046952	0.289008	GO:0032201
GO:0045736	BP	negative regulation of cyclin-dependent protein serine/threonine kinase activity	33	0.0470158	0.289008	GO:0045736
GO:0005088	MF	Ras guanyl-nucleotide exchange factor activity	14	0.0470875	0.289008	GO:0005088
GO:0032993	CC	protein-DNA complex	45	0.0471475	0.289008	GO:0032993
GO:0051893	BP	regulation of focal adhesion assembly	21	0.0472527	0.289008	GO:0051893
GO:0043236	MF	laminin binding	21	0.0472856	0.289008	GO:0043236
GO:0030516	BP	regulation of axon extension	13	0.0474055	0.289008	GO:0030516
GO:0001659	BP	temperature homeostasis	20	0.0474428	0.289008	GO:0001659
GO:0008104	BP	protein localization	59	0.0476176	0.289008	GO:0008104
GO:0008203	BP	cholesterol metabolic process	62	0.0476331	0.289008	GO:0008203
GO:0048208	BP	COPII vesicle coating	64	0.0476699	0.289008	GO:0048208
GO:0022408	BP	negative regulation of cell-cell adhesion	14	0.0477201	0.289008	GO:0022408
GO:0060716	BP	labyrinthine layer blood vessel development	19	0.0479836	0.289889	GO:0060716
GO:0001578	BP	microtubule bundle formation	26	0.0480922	0.289889	GO:0001578
GO:0032099	BP	negative regulation of appetite	10	0.0483114	0.289889	GO:0032099
GO:0033189	BP	response to vitamin A	19	0.0483277	0.289889	GO:0033189
GO:0060612	BP	adipose tissue development	27	0.0484134	0.289889	GO:0060612
GO:0045778	BP	positive regulation of ossification	13	0.0484205	0.289889	GO:0045778
GO:0045454	BP	cell redox homeostasis	69	0.048731	0.289889	GO:0045454
GO:0051209	BP	release of sequestered calcium ion into cytosol	36	0.0487594	0.289889	GO:0051209
GO:0017025	MF	TBP-class protein binding	18	0.0487754	0.289889	GO:0017025
GO:0010821	BP	regulation of mitochondrion organization	13	0.0488488	0.289889	GO:0010821
GO:0046907	BP	intracellular transport	12	0.0488517	0.289889	GO:0046907
GO:0032963	BP	collagen metabolic process	12	0.0489018	0.289889	GO:0032963
GO:0031334	BP	positive regulation of protein complex assembly	26	0.0489274	0.289889	GO:0031334
GO:0061952	BP	midbody abscission	17	0.049079	0.290158	GO:0061952
GO:0033391	CC	chromatoid body	13	0.0491364	0.290158	GO:0033391
GO:0042771	BP	intrinsic apoptotic signaling pathway in response to DNA damage by p53 class mediator	27	0.0493377	0.290388	GO:0042771
GO:0006730	BP	one-carbon metabolic process	18	0.0493389	0.290388	GO:0006730
GO:0048536	BP	spleen development	33	0.0495167	0.290951	GO:0048536
GO:0021527	BP	spinal cord association neuron differentiation	13	0.0496204	0.291079	GO:0021527
GO:0017016	MF	Ras GTPase binding	14	0.0497195	0.291179	GO:0017016
GO:0010165	BP	response to X-ray	18	0.0499769	0.291594	GO:0010165
GO:0031054	BP	pre-miRNA processing	12	0.0499893	0.291594	GO:0031054
GO:0060644	BP	mammary gland epithelial cell differentiation	13	0.0500687	0.291594	GO:0060644
GO:0001223	MF	transcription coactivator binding	18	0.050254	0.291594	GO:0001223
GO:0015459	MF	potassium channel regulator activity	36	0.050314	0.291594	GO:0015459
GO:0043666	BP	regulation of phosphoprotein phosphatase activity	39	0.0503918	0.291594	GO:0043666
GO:0030127	CC	COPII vesicle coat	12	0.0504453	0.291594	GO:0030127
GO:0005545	MF	1-phosphatidylinositol binding	14	0.0504477	0.291594	GO:0005545
GO:0071498	BP	cellular response to fluid shear stress	12	0.0507823	0.29296	GO:0071498
GO:0035108	BP	limb morphogenesis	13	0.0508491	0.29296	GO:0035108
GO:0030008	CC	TRAPP complex	11	0.0510022	0.293333	GO:0030008
GO:0051233	CC	spindle midzone	19	0.0511182	0.293333	GO:0051233
GO:0010811	BP	positive regulation of cell-substrate adhesion	32	0.0513357	0.293333	GO:0010811
GO:0002931	BP	response to ischemia	50	0.0513608	0.293333	GO:0002931
GO:0007020	BP	microtubule nucleation	13	0.0514608	0.293333	GO:0007020
GO:0001954	BP	positive regulation of cell-matrix adhesion	26	0.0515601	0.293333	GO:0001954
GO:0048255	BP	mRNA stabilization	19	0.0515743	0.293333	GO:0048255
GO:0035023	BP	regulation of Rho protein signal transduction	82	0.0516539	0.293333	GO:0035023
GO:0061700	CC	GATOR2 complex	11	0.0516886	0.293333	GO:0061700
GO:0005089	MF	Rho guanyl-nucleotide exchange factor activity	65	0.0517403	0.293333	GO:0005089
GO:0003756	MF	protein disulfide isomerase activity	12	0.051828	0.293361	GO:0003756
GO:0043616	BP	keratinocyte proliferation	11	0.0519586	0.293632	GO:0043616
GO:0051693	BP	actin filament capping	13	0.0520498	0.29368	GO:0051693
GO:0019774	CC	proteasome core complex, beta-subunit complex	11	0.0522896	0.294565	GO:0019774
GO:0010717	BP	regulation of epithelial to mesenchymal transition	13	0.0525436	0.295527	GO:0010717
GO:0006626	BP	protein targeting to mitochondrion	30	0.0527178	0.295639	GO:0006626
GO:1904115	CC	axon cytoplasm	54	0.0527303	0.295639	GO:1904115
GO:0090305	BP	nucleic acid phosphodiester bond hydrolysis	67	0.0530368	0.296292	GO:0090305
GO:0046332	MF	SMAD binding	44	0.0531678	0.296292	GO:0046332
GO:0006405	BP	RNA export from nucleus	42	0.0532672	0.296292	GO:0006405
GO:0050772	BP	positive regulation of axonogenesis	21	0.0533329	0.296292	GO:0050772
GO:0030676	MF	Rac guanyl-nucleotide exchange factor activity	14	0.0533636	0.296292	GO:0030676
GO:0097110	MF	scaffold protein binding	58	0.0534206	0.296292	GO:0097110
GO:0046854	BP	phosphatidylinositol phosphorylation	27	0.0534312	0.296292	GO:0046854
GO:0030099	BP	myeloid cell differentiation	18	0.053599	0.296667	GO:0030099
GO:0070987	BP	error-free translesion synthesis	19	0.0536659	0.296667	GO:0070987
GO:0090162	BP	establishment of epithelial cell polarity	13	0.0538342	0.297135	GO:0090162
GO:0030315	CC	T-tubule	42	0.0539371	0.29724	GO:0030315
GO:0008630	BP	intrinsic apoptotic signaling pathway in response to DNA damage	31	0.0542301	0.297832	GO:0008630
GO:0007417	BP	central nervous system development	99	0.0543754	0.297832	GO:0007417
GO:0060999	BP	positive regulation of dendritic spine development	22	0.0543965	0.297832	GO:0060999
GO:0004722	MF	protein serine/threonine phosphatase activity	37	0.0544353	0.297832	GO:0004722
GO:0060425	BP	lung morphogenesis	12	0.0544781	0.297832	GO:0060425
GO:0019827	BP	stem cell population maintenance	52	0.0545715	0.297832	GO:0019827
GO:0099056	CC	integral component of presynaptic membrane	60	0.054698	0.297832	GO:0099056
GO:0050796	BP	regulation of insulin secretion	64	0.0547297	0.297832	GO:0050796
GO:0006309	BP	apoptotic DNA fragmentation	11	0.0547997	0.297832	GO:0006309
GO:0006284	BP	base-excision repair	24	0.0549561	0.297977	GO:0006284
GO:0098686	CC	hippocampal mossy fiber to CA3 synapse	33	0.0550683	0.297977	GO:0098686
GO:0060291	BP	long-term synaptic potentiation	37	0.0551493	0.297977	GO:0060291
GO:0010458	BP	exit from mitosis	12	0.0551622	0.297977	GO:0010458
GO:0035329	BP	hippo signaling	27	0.0552518	0.298007	GO:0035329
GO:0023019	BP	signal transduction involved in regulation of gene expression	19	0.0553587	0.298131	GO:0023019
GO:0060218	BP	hematopoietic stem cell differentiation	13	0.0555686	0.298807	GO:0060218
GO:0061351	BP	neural precursor cell proliferation	11	0.0556898	0.299006	GO:0061351
GO:0031492	MF	nucleosomal DNA binding	30	0.0558505	0.299416	GO:0031492
GO:0000289	BP	nuclear-transcribed mRNA poly(A) tail shortening	20	0.0560131	0.299505	GO:0000289
GO:1902894	BP	negative regulation of pri-miRNA transcription by RNA polymerase II	13	0.0560359	0.299505	GO:1902894
GO:0008360	BP	regulation of cell shape	119	0.0563113	0.299779	GO:0008360
GO:0010212	BP	response to ionizing radiation	43	0.0563302	0.299779	GO:0010212
GO:0034605	BP	cellular response to heat	46	0.0563405	0.299779	GO:0034605
GO:0001934	BP	positive regulation of protein phosphorylation	148	0.0565016	0.300186	GO:0001934
GO:0034236	MF	protein kinase A catalytic subunit binding	13	0.0568281	0.300876	GO:0034236
GO:0045494	BP	photoreceptor cell maintenance	37	0.0568461	0.300876	GO:0045494
GO:0031418	MF	L-ascorbic acid binding	20	0.0569772	0.300876	GO:0031418
GO:0005080	MF	protein kinase C binding	46	0.0570743	0.300876	GO:0005080
GO:0060252	BP	positive regulation of glial cell proliferation	17	0.0572282	0.300876	GO:0060252
GO:0014066	BP	regulation of phosphatidylinositol 3-kinase signaling	20	0.0572383	0.300876	GO:0014066
GO:0099151	BP	regulation of postsynaptic density assembly	11	0.0573294	0.300876	GO:0099151
GO:0070059	BP	intrinsic apoptotic signaling pathway in response to endoplasmic reticulum stress	30	0.0573721	0.300876	GO:0070059
GO:0034399	CC	nuclear periphery	12	0.0573944	0.300876	GO:0034399
GO:0035102	CC	PRC1 complex	12	0.0576679	0.301863	GO:0035102
GO:0032091	BP	negative regulation of protein binding	73	0.0577876	0.302044	GO:0032091
GO:0019855	MF	calcium channel inhibitor activity	11	0.0579982	0.302281	GO:0019855
GO:0032026	BP	response to magnesium ion	12	0.0580033	0.302281	GO:0032026
GO:0004521	MF	endoribonuclease activity	18	0.0581355	0.302359	GO:0004521
GO:0005778	CC	peroxisomal membrane	55	0.0583743	0.302359	GO:0005778
GO:0031464	CC	Cul4A-RING E3 ubiquitin ligase complex	12	0.0584025	0.302359	GO:0031464
GO:0061029	BP	eyelid development in camera-type eye	13	0.0584352	0.302359	GO:0061029
GO:0030178	BP	negative regulation of Wnt signaling pathway	37	0.0585104	0.302359	GO:0030178
GO:0001094	MF	TFIID-class transcription factor complex binding	11	0.0585293	0.302359	GO:0001094
GO:0034614	BP	cellular response to reactive oxygen species	35	0.0586495	0.302539	GO:0034614
GO:0048511	BP	rhythmic process	64	0.0589133	0.302873	GO:0048511
GO:0035770	CC	ribonucleoprotein granule	10	0.059066	0.302873	GO:0035770
GO:0001892	BP	embryonic placenta development	19	0.0591883	0.302873	GO:0001892
GO:0045747	BP	positive regulation of Notch signaling pathway	50	0.059215	0.302873	GO:0045747
GO:0032148	BP	activation of protein kinase B activity	34	0.0593121	0.302873	GO:0032148
GO:0001942	BP	hair follicle development	38	0.0593432	0.302873	GO:0001942
GO:0030879	BP	mammary gland development	20	0.0594171	0.302873	GO:0030879
GO:0051091	BP	positive regulation of DNA-binding transcription factor activity	109	0.0594224	0.302873	GO:0051091
GO:0010863	BP	positive regulation of phospholipase C activity	13	0.0595243	0.302873	GO:0010863
GO:1904903	BP	ESCRT III complex disassembly	10	0.0595676	0.302873	GO:1904903
GO:0000932	CC	P-body	63	0.0599634	0.304449	GO:0000932
GO:0033077	BP	T cell differentiation in thymus	29	0.0601068	0.304741	GO:0033077
GO:0071564	CC	npBAF complex	12	0.0602877	0.30488	GO:0071564
GO:0035641	BP	locomotory exploration behavior	12	0.060306	0.30488	GO:0035641
GO:0010884	BP	positive regulation of lipid storage	11	0.0604023	0.304933	GO:0010884
GO:0005795	CC	Golgi stack	34	0.0605073	0.305029	GO:0005795
GO:0045599	BP	negative regulation of fat cell differentiation	50	0.0606705	0.30532	GO:0045599
GO:0016572	BP	histone phosphorylation	12	0.0608739	0.30532	GO:0016572
GO:0000380	BP	alternative mRNA splicing, via spliceosome	17	0.061017	0.30532	GO:0000380
GO:0071542	BP	dopaminergic neuron differentiation	19	0.0610336	0.30532	GO:0071542
GO:0004725	MF	protein tyrosine phosphatase activity	83	0.0610768	0.30532	GO:0004725
GO:0048711	BP	positive regulation of astrocyte differentiation	11	0.0610812	0.30532	GO:0048711
GO:0008076	CC	voltage-gated potassium channel complex	73	0.0612065	0.305516	GO:0008076
GO:0004721	MF	phosphoprotein phosphatase activity	30	0.0613768	0.305936	GO:0004721
GO:0051496	BP	positive regulation of stress fiber assembly	51	0.0615526	0.306206	GO:0051496
GO:0050768	BP	negative regulation of neurogenesis	20	0.061665	0.306206	GO:0050768
GO:0008353	MF	RNA polymerase II CTD heptapeptide repeat kinase activity	17	0.0619251	0.306206	GO:0008353
GO:2000045	BP	regulation of G1/S transition of mitotic cell cycle	11	0.0620553	0.306206	GO:2000045
GO:0035259	MF	glucocorticoid receptor binding	12	0.0621358	0.306206	GO:0035259
GO:0071480	BP	cellular response to gamma radiation	29	0.0621549	0.306206	GO:0071480
GO:0006446	BP	regulation of translational initiation	24	0.0622173	0.306206	GO:0006446
GO:0016514	CC	SWI/SNF complex	19	0.0623467	0.306206	GO:0016514
GO:0031167	BP	rRNA methylation	10	0.0623891	0.306206	GO:0031167
GO:0015949	BP	nucleobase-containing small molecule interconversion	27	0.062426	0.306206	GO:0015949
GO:2000178	BP	negative regulation of neural precursor cell proliferation	12	0.0625166	0.306206	GO:2000178
GO:0044344	BP	cellular response to fibroblast growth factor stimulus	29	0.062572	0.306206	GO:0044344
GO:0004715	MF	non-membrane spanning protein tyrosine kinase activity	37	0.0625804	0.306206	GO:0004715
GO:1904874	BP	positive regulation of telomerase RNA localization to Cajal body	15	0.062639	0.306206	GO:1904874
GO:0001786	MF	phosphatidylserine binding	35	0.0628624	0.306666	GO:0001786
GO:0006099	BP	tricarboxylic acid cycle	27	0.0629058	0.306666	GO:0006099
GO:0001974	BP	blood vessel remodeling	32	0.0631319	0.307346	GO:0001974
GO:0001222	MF	transcription corepressor binding	11	0.0632824	0.307617	GO:0001222
GO:0030155	BP	regulation of cell adhesion	42	0.0633854	0.307617	GO:0030155
GO:0031463	CC	Cul3-RING ubiquitin ligase complex	34	0.0635764	0.307617	GO:0031463
GO:0050999	BP	regulation of nitric-oxide synthase activity	20	0.0636604	0.307617	GO:0050999
GO:0001944	BP	vasculature development	12	0.0637892	0.307617	GO:0001944
GO:0030878	BP	thyroid gland development	20	0.0638274	0.307617	GO:0030878
GO:0045165	BP	cell fate commitment	26	0.0638665	0.307617	GO:0045165
GO:0086012	BP	membrane depolarization during cardiac muscle cell action potential	12	0.0640036	0.307617	GO:0086012
GO:0032786	BP	positive regulation of DNA-templated transcription, elongation	11	0.0641908	0.307617	GO:0032786
GO:0019902	MF	phosphatase binding	49	0.0642447	0.307617	GO:0019902
GO:0046685	BP	response to arsenic-containing substance	12	0.0642875	0.307617	GO:0046685
GO:0045879	BP	negative regulation of smoothened signaling pathway	24	0.064316	0.307617	GO:0045879
GO:0014003	BP	oligodendrocyte development	23	0.064396	0.307617	GO:0014003
GO:0034332	BP	adherens junction organization	35	0.064501	0.307617	GO:0034332
GO:0035097	CC	histone methyltransferase complex	23	0.0645639	0.307617	GO:0035097
GO:0019933	BP	cAMP-mediated signaling	27	0.0646287	0.307617	GO:0019933
GO:0038003	BP	opioid receptor signaling pathway	10	0.0647069	0.307617	GO:0038003
GO:0033270	CC	paranode region of axon	12	0.0647479	0.307617	GO:0033270
GO:0034260	BP	negative regulation of GTPase activity	49	0.0649421	0.307845	GO:0034260
GO:0035631	CC	CD40 receptor complex	11	0.0650524	0.307845	GO:0035631
GO:0030203	BP	glycosaminoglycan metabolic process	10	0.065056	0.307845	GO:0030203
GO:0031076	BP	embryonic camera-type eye development	12	0.0653328	0.308155	GO:0031076
GO:2000772	BP	regulation of cellular senescence	12	0.0653604	0.308155	GO:2000772
GO:0017112	MF	Rab guanyl-nucleotide exchange factor activity	33	0.0653887	0.308155	GO:0017112
GO:0050679	BP	positive regulation of epithelial cell proliferation	58	0.06554	0.308155	GO:0050679
GO:0035418	BP	protein localization to synapse	12	0.0656322	0.308155	GO:0035418
GO:0035019	BP	somatic stem cell population maintenance	63	0.0656425	0.308155	GO:0035019
GO:0008610	BP	lipid biosynthetic process	11	0.0659557	0.30896	GO:0008610
GO:0032007	BP	negative regulation of TOR signaling	31	0.0660073	0.30896	GO:0032007
GO:0090103	BP	cochlea morphogenesis	24	0.0661346	0.30896	GO:0090103
GO:0061179	BP	negative regulation of insulin secretion involved in cellular response to glucose stimulus	10	0.0662094	0.30896	GO:0061179
GO:0051642	BP	centrosome localization	12	0.0662972	0.30896	GO:0051642
GO:0042462	BP	eye photoreceptor cell development	18	0.0664119	0.30896	GO:0042462
GO:0010608	BP	posttranscriptional regulation of gene expression	24	0.0664234	0.30896	GO:0010608
GO:0031594	CC	neuromuscular junction	60	0.0666752	0.309287	GO:0031594
GO:0043548	MF	phosphatidylinositol 3-kinase binding	19	0.0667302	0.309287	GO:0043548
GO:1901030	BP	positive regulation of mitochondrial outer membrane permeabilization involved in apoptotic signaling pathway	10	0.066872	0.309287	GO:1901030
GO:0070273	MF	phosphatidylinositol-4-phosphate binding	24	0.0668829	0.309287	GO:0070273
GO:0007413	BP	axonal fasciculation	20	0.066954	0.309287	GO:0007413
GO:0070301	BP	cellular response to hydrogen peroxide	68	0.0670165	0.309287	GO:0070301
GO:0006882	BP	cellular zinc ion homeostasis	11	0.0671435	0.309471	GO:0006882
GO:0032433	CC	filopodium tip	18	0.0675888	0.311119	GO:0032433
GO:0032801	BP	receptor catabolic process	12	0.0679376	0.312319	GO:0032801
GO:0045669	BP	positive regulation of osteoblast differentiation	65	0.0680992	0.312657	GO:0045669
GO:0070979	BP	protein K11-linked ubiquitination	28	0.0682271	0.31284	GO:0070979
GO:0001570	BP	vasculogenesis	58	0.0684005	0.31323	GO:0001570
GO:0005741	CC	mitochondrial outer membrane	153	0.068589	0.313336	GO:0005741
GO:0001678	BP	cellular glucose homeostasis	16	0.0686001	0.313336	GO:0001678
GO:0007268	BP	chemical synaptic transmission	146	0.0688413	0.313928	GO:0007268
GO:0071805	BP	potassium ion transmembrane transport	65	0.0689947	0.313928	GO:0071805
GO:0000226	BP	microtubule cytoskeleton organization	59	0.0689952	0.313928	GO:0000226
GO:0031398	BP	positive regulation of protein ubiquitination	70	0.0691839	0.314126	GO:0031398
GO:0004004	MF	ATP-dependent RNA helicase activity	23	0.0692157	0.314126	GO:0004004
GO:0031065	BP	positive regulation of histone deacetylation	12	0.0693234	0.314172	GO:0031065
GO:1990909	CC	Wnt signalosome	12	0.0694029	0.314172	GO:1990909
GO:0034451	CC	centriolar satellite	30	0.0699197	0.31595	GO:0034451
GO:0043153	BP	entrainment of circadian clock by photoperiod	19	0.0699826	0.31595	GO:0043153
GO:0050680	BP	negative regulation of epithelial cell proliferation	61	0.0700628	0.31595	GO:0050680
GO:0006783	BP	heme biosynthetic process	21	0.0704477	0.317283	GO:0006783
GO:0000077	BP	DNA damage checkpoint	28	0.0707443	0.317967	GO:0000077
GO:0030136	CC	clathrin-coated vesicle	54	0.0708316	0.317967	GO:0030136
GO:0031252	CC	cell leading edge	42	0.0708683	0.317967	GO:0031252
GO:0072001	BP	renal system development	12	0.0710512	0.318119	GO:0072001
GO:0006812	BP	cation transport	26	0.0710815	0.318119	GO:0006812
GO:0043531	MF	ADP binding	35	0.0711859	0.318126	GO:0043531
GO:0051881	BP	regulation of mitochondrial membrane potential	29	0.0712624	0.318126	GO:0051881
GO:1900740	BP	positive regulation of protein insertion into mitochondrial membrane involved in apoptotic signaling pathway	25	0.0715227	0.318417	GO:1900740
GO:0042592	BP	homeostatic process	12	0.0717261	0.318417	GO:0042592
GO:0016922	MF	nuclear receptor binding	18	0.0717569	0.318417	GO:0016922
GO:0032793	BP	positive regulation of CREB transcription factor activity	18	0.0718374	0.318417	GO:0032793
GO:0005975	BP	carbohydrate metabolic process	118	0.0718506	0.318417	GO:0005975
GO:0098981	CC	cholinergic synapse	11	0.0718829	0.318417	GO:0098981
GO:0051059	MF	NF-kappaB binding	29	0.0719612	0.318417	GO:0051059
GO:0001569	BP	branching involved in blood vessel morphogenesis	26	0.0720559	0.318417	GO:0001569
GO:0006139	BP	nucleobase-containing compound metabolic process	33	0.0722067	0.318417	GO:0006139
GO:0034450	MF	ubiquitin-ubiquitin ligase activity	11	0.0722536	0.318417	GO:0034450
GO:0060074	BP	synapse maturation	12	0.0723145	0.318417	GO:0060074
GO:0031116	BP	positive regulation of microtubule polymerization	25	0.072536	0.318997	GO:0031116
GO:0032266	MF	phosphatidylinositol-3-phosphate binding	38	0.07296	0.320335	GO:0032266
GO:0001755	BP	neural crest cell migration	24	0.0732288	0.320335	GO:0001755
GO:0007229	BP	integrin-mediated signaling pathway	83	0.0732325	0.320335	GO:0007229
GO:0030968	BP	endoplasmic reticulum unfolded protein response	33	0.0732623	0.320335	GO:0030968
GO:0033539	BP	fatty acid beta-oxidation using acyl-CoA dehydrogenase	10	0.0732916	0.320335	GO:0033539
GO:0005657	CC	replication fork	23	0.073417	0.320444	GO:0005657
GO:2000036	BP	regulation of stem cell population maintenance	12	0.0735494	0.320444	GO:2000036
GO:0007265	BP	Ras protein signal transduction	67	0.0735876	0.320444	GO:0007265
GO:0050855	BP	regulation of B cell receptor signaling pathway	11	0.0740561	0.321751	GO:0050855
GO:0051019	MF	mitogen-activated protein kinase binding	18	0.0740688	0.321751	GO:0051019
GO:0070182	MF	DNA polymerase binding	17	0.0742325	0.321765	GO:0070182
GO:0010923	BP	negative regulation of phosphatase activity	50	0.0742534	0.321765	GO:0010923
GO:0030955	MF	potassium ion binding	11	0.0743779	0.321911	GO:0030955
GO:0001662	BP	behavioral fear response	29	0.0745313	0.322182	GO:0001662
GO:0046834	BP	lipid phosphorylation	12	0.0747786	0.32244	GO:0046834
GO:0008179	MF	adenylate cyclase binding	11	0.0748022	0.32244	GO:0008179
GO:0048596	BP	embryonic camera-type eye morphogenesis	12	0.0749581	0.32244	GO:0048596
GO:0071230	BP	cellular response to amino acid stimulus	49	0.0749654	0.32244	GO:0071230
GO:0060213	BP	positive regulation of nuclear-transcribed mRNA poly(A) tail shortening	10	0.0750451	0.32244	GO:0060213
GO:0031080	CC	nuclear pore outer ring	10	0.0753514	0.323364	GO:0031080
GO:0051966	BP	regulation of synaptic transmission, glutamatergic	18	0.0754729	0.323494	GO:0051966
GO:0043425	MF	bHLH transcription factor binding	24	0.0757358	0.324229	GO:0043425
GO:0019905	MF	syntaxin binding	37	0.0759756	0.324799	GO:0019905
GO:0031519	CC	PcG protein complex	24	0.0760518	0.324799	GO:0031519
GO:0036477	CC	somatodendritic compartment	12	0.0762476	0.325244	GO:0036477
GO:0043034	CC	costamere	18	0.0763527	0.325301	GO:0043034
GO:0007519	BP	skeletal muscle tissue development	48	0.0767238	0.32649	GO:0007519
GO:0097192	BP	extrinsic apoptotic signaling pathway in absence of ligand	22	0.0768416	0.3266	GO:0097192
GO:0034244	BP	negative regulation of transcription elongation from RNA polymerase II promoter	10	0.0775481	0.328651	GO:0034244
GO:0021522	BP	spinal cord motor neuron differentiation	17	0.0776642	0.328651	GO:0021522
GO:0043539	MF	protein serine/threonine kinase activator activity	27	0.0776849	0.328651	GO:0043539
GO:0045335	CC	phagocytic vesicle	58	0.0776946	0.328651	GO:0045335
GO:0016050	BP	vesicle organization	11	0.0778975	0.328776	GO:0016050
GO:0007626	BP	locomotory behavior	83	0.0779094	0.328776	GO:0007626
GO:0045600	BP	positive regulation of fat cell differentiation	53	0.0780223	0.328861	GO:0045600
GO:0005885	CC	Arp2/3 protein complex	10	0.0782658	0.329496	GO:0005885
GO:0048786	CC	presynaptic active zone	31	0.0784826	0.330018	GO:0048786
GO:0090110	BP	cargo loading into COPII-coated vesicle	11	0.0786439	0.330304	GO:0090110
GO:0060037	BP	pharyngeal system development	18	0.0791549	0.331162	GO:0060037
GO:0032183	MF	SUMO binding	11	0.079178	0.331162	GO:0032183
GO:0012505	CC	endomembrane system	53	0.079178	0.331162	GO:0012505
GO:0032045	CC	guanyl-nucleotide exchange factor complex	11	0.0792214	0.331162	GO:0032045
GO:0048812	BP	neuron projection morphogenesis	42	0.079473	0.331823	GO:0048812
GO:0001946	BP	lymphangiogenesis	11	0.0797441	0.331953	GO:0001946
GO:0044320	BP	cellular response to leptin stimulus	10	0.0799146	0.331953	GO:0044320
GO:0009653	BP	anatomical structure morphogenesis	81	0.0799463	0.331953	GO:0009653
GO:0048681	BP	negative regulation of axon regeneration	11	0.0799706	0.331953	GO:0048681
GO:0009953	BP	dorsal/ventral pattern formation	30	0.0800617	0.331953	GO:0009953
GO:0017137	MF	Rab GTPase binding	84	0.0801496	0.331953	GO:0017137
GO:0017119	CC	Golgi transport complex	11	0.0802838	0.331953	GO:0017119
GO:0045807	BP	positive regulation of endocytosis	22	0.0803343	0.331953	GO:0045807
GO:0030073	BP	insulin secretion	33	0.080369	0.331953	GO:0030073
GO:0005697	CC	telomerase holoenzyme complex	19	0.0804393	0.331953	GO:0005697
GO:0048490	BP	anterograde synaptic vesicle transport	16	0.0807769	0.332958	GO:0048490
GO:0034237	MF	protein kinase A regulatory subunit binding	17	0.0809326	0.3332	GO:0034237
GO:0048706	BP	embryonic skeletal system development	31	0.0810232	0.3332	GO:0048706
GO:0031113	BP	regulation of microtubule polymerization	10	0.0813365	0.333249	GO:0031113
GO:0009651	BP	response to salt stress	10	0.0813406	0.333249	GO:0009651
GO:0005720	CC	nuclear heterochromatin	20	0.0814243	0.333249	GO:0005720
GO:0001501	BP	skeletal system development	120	0.0815497	0.333249	GO:0001501
GO:0035646	BP	endosome to melanosome transport	10	0.0815801	0.333249	GO:0035646
GO:0051539	MF	4 iron, 4 sulfur cluster binding	35	0.0816029	0.333249	GO:0051539
GO:0055072	BP	iron ion homeostasis	23	0.0817519	0.333249	GO:0055072
GO:0043087	BP	regulation of GTPase activity	54	0.0817863	0.333249	GO:0043087
GO:0050434	BP	positive regulation of viral transcription	27	0.0821306	0.334268	GO:0050434
GO:0006879	BP	cellular iron ion homeostasis	55	0.082297	0.334561	GO:0006879
GO:1903146	BP	regulation of autophagy of mitochondrion	16	0.0826892	0.335771	GO:1903146
GO:0051020	MF	GTPase binding	33	0.0830613	0.336897	GO:0051020
GO:0010314	MF	phosphatidylinositol-5-phosphate binding	17	0.0836075	0.338361	GO:0010314
GO:0035307	BP	positive regulation of protein dephosphorylation	25	0.0837639	0.338361	GO:0035307
GO:0021915	BP	neural tube development	26	0.0837981	0.338361	GO:0021915
GO:0018279	BP	protein N-linked glycosylation via asparagine	31	0.0838768	0.338361	GO:0018279
GO:0090503	BP	RNA phosphodiester bond hydrolysis, exonucleolytic	33	0.0840451	0.338361	GO:0090503
GO:0005640	CC	nuclear outer membrane	24	0.0840588	0.338361	GO:0005640
GO:0061635	BP	regulation of protein complex stability	10	0.0840897	0.338361	GO:0061635
GO:0002223	BP	stimulatory C-type lectin receptor signaling pathway	113	0.0844057	0.338687	GO:0002223
GO:0051726	BP	regulation of cell cycle	93	0.0844872	0.338687	GO:0051726
GO:0043220	CC	Schmidt-Lanterman incisure	11	0.0845112	0.338687	GO:0043220
GO:0032874	BP	positive regulation of stress-activated MAPK cascade	16	0.0846259	0.338687	GO:0032874
GO:0030957	MF	Tat protein binding	10	0.0848189	0.338687	GO:0030957
GO:0043162	BP	ubiquitin-dependent protein catabolic process via the multivesicular body sorting pathway	15	0.0851095	0.338687	GO:0043162
GO:1903358	BP	regulation of Golgi organization	11	0.0851608	0.338687	GO:1903358
GO:0051781	BP	positive regulation of cell division	47	0.0851751	0.338687	GO:0051781
GO:0060174	BP	limb bud formation	11	0.0852163	0.338687	GO:0060174
GO:0060173	BP	limb development	31	0.0852266	0.338687	GO:0060173
GO:0033116	CC	endoplasmic reticulum-Golgi intermediate compartment membrane	69	0.0852879	0.338687	GO:0033116
GO:0009611	BP	response to wounding	62	0.0853746	0.338687	GO:0009611
GO:0032495	BP	response to muramyl dipeptide	11	0.0854701	0.338687	GO:0032495
GO:0070491	MF	repressing transcription factor binding	34	0.0855068	0.338687	GO:0070491
GO:0060349	BP	bone morphogenesis	25	0.085627	0.338785	GO:0060349
GO:0032367	BP	intracellular cholesterol transport	10	0.0858132	0.339072	GO:0032367
GO:0045995	BP	regulation of embryonic development	19	0.0858907	0.339072	GO:0045995
GO:2000378	BP	negative regulation of reactive oxygen species metabolic process	23	0.0863907	0.339763	GO:2000378
GO:0003149	BP	membranous septum morphogenesis	10	0.0863921	0.339763	GO:0003149
GO:0051262	BP	protein tetramerization	35	0.0864421	0.339763	GO:0051262
GO:1904262	BP	negative regulation of TORC1 signaling	15	0.0864486	0.339763	GO:1904262
GO:0005876	CC	spindle microtubule	31	0.0865823	0.339912	GO:0005876
GO:0031982	CC	vesicle	130	0.0870608	0.340977	GO:0031982
GO:0010225	BP	response to UV-C	10	0.0870778	0.340977	GO:0010225
GO:0003281	BP	ventricular septum development	33	0.0871417	0.340977	GO:0003281
GO:0030877	CC	beta-catenin destruction complex	11	0.0874684	0.341878	GO:0030877
GO:0090084	BP	negative regulation of inclusion body assembly	10	0.0879985	0.343572	GO:0090084
GO:0030901	BP	midbrain development	27	0.0882524	0.343676	GO:0030901
GO:0034629	BP	cellular protein-containing complex localization	10	0.0882908	0.343676	GO:0034629
GO:0016208	MF	AMP binding	10	0.0883156	0.343676	GO:0016208
GO:1990869	BP	cellular response to chemokine	16	0.0885003	0.344017	GO:1990869
GO:0051145	BP	smooth muscle cell differentiation	11	0.0886282	0.344137	GO:0051145
GO:0070411	MF	I-SMAD binding	11	0.0887845	0.344367	GO:0070411
GO:0060325	BP	face morphogenesis	30	0.0890599	0.344631	GO:0060325
GO:0007095	BP	mitotic G2 DNA damage checkpoint	16	0.089192	0.344631	GO:0007095
GO:0051186	BP	cofactor metabolic process	10	0.0892037	0.344631	GO:0051186
GO:0048839	BP	inner ear development	46	0.089336	0.344631	GO:0048839
GO:0007043	BP	cell-cell junction assembly	17	0.0894777	0.344631	GO:0007043
GO:0060285	BP	cilium-dependent cell motility	11	0.089552	0.344631	GO:0060285
GO:0005774	CC	vacuolar membrane	10	0.0895596	0.344631	GO:0005774
GO:0060078	BP	regulation of postsynaptic membrane potential	24	0.0896292	0.344631	GO:0060078
GO:0071711	BP	basement membrane organization	11	0.0899201	0.345375	GO:0071711
GO:0034622	BP	cellular protein-containing complex assembly	19	0.09017	0.345738	GO:0034622
GO:0032802	BP	low-density lipoprotein particle receptor catabolic process	10	0.0904033	0.345738	GO:0032802
GO:0000175	MF	3'-5'-exoribonuclease activity	21	0.0904761	0.345738	GO:0000175
GO:0046580	BP	negative regulation of Ras protein signal transduction	22	0.0905047	0.345738	GO:0046580
GO:0006024	BP	glycosaminoglycan biosynthetic process	37	0.0905658	0.345738	GO:0006024
GO:0005811	CC	lipid droplet	70	0.0905991	0.345738	GO:0005811
GO:2000463	BP	positive regulation of excitatory postsynaptic potential	25	0.0911759	0.347306	GO:2000463
GO:0009725	BP	response to hormone	34	0.0912057	0.347306	GO:0009725
GO:1901799	BP	negative regulation of proteasomal protein catabolic process	10	0.0915638	0.348296	GO:1901799
GO:0097242	BP	amyloid-beta clearance	11	0.0917029	0.348452	GO:0097242
GO:0010803	BP	regulation of tumor necrosis factor-mediated signaling pathway	29	0.0919423	0.348747	GO:0010803
GO:0031032	BP	actomyosin structure organization	17	0.0919773	0.348747	GO:0031032
GO:0019888	MF	protein phosphatase regulator activity	29	0.0922541	0.349194	GO:0019888
GO:0071313	BP	cellular response to caffeine	10	0.0922919	0.349194	GO:0071313
GO:0008340	BP	determination of adult lifespan	16	0.0927722	0.350637	GO:0008340
GO:0006605	BP	protein targeting	40	0.0928738	0.350648	GO:0006605
GO:0044297	CC	cell body	73	0.0934958	0.352621	GO:0044297
GO:0042593	BP	glucose homeostasis	102	0.09394	0.35392	GO:0042593
GO:0045786	BP	negative regulation of cell cycle	41	0.0941249	0.354241	GO:0045786
GO:0005246	MF	calcium channel regulator activity	29	0.0943436	0.354252	GO:0005246
GO:0042169	MF	SH2 domain binding	35	0.0944155	0.354252	GO:0042169
GO:0031532	BP	actin cytoskeleton reorganization	47	0.0944273	0.354252	GO:0031532
GO:0032481	BP	positive regulation of type I interferon production	50	0.0948021	0.355144	GO:0032481
GO:0071539	BP	protein localization to centrosome	18	0.0949317	0.355144	GO:0071539
GO:0045070	BP	positive regulation of viral genome replication	26	0.0949764	0.355144	GO:0045070
GO:0043278	BP	response to morphine	29	0.0950654	0.355144	GO:0043278
GO:0010470	BP	regulation of gastrulation	10	0.0952734	0.355547	GO:0010470
GO:0019903	MF	protein phosphatase binding	83	0.095385	0.35559	GO:0019903
GO:0045647	BP	negative regulation of erythrocyte differentiation	10	0.095787	0.356372	GO:0045647
GO:0003951	MF	NAD+ kinase activity	17	0.0958146	0.356372	GO:0003951
GO:1904322	BP	cellular response to forskolin	11	0.0958962	0.356372	GO:1904322
GO:0060976	BP	coronary vasculature development	26	0.0960305	0.356498	GO:0060976
GO:0008286	BP	insulin receptor signaling pathway	74	0.0962172	0.356598	GO:0008286
GO:0031434	MF	mitogen-activated protein kinase kinase binding	11	0.0962583	0.356598	GO:0031434
GO:0031929	BP	TOR signaling	17	0.096418	0.356817	GO:0031929
GO:0030509	BP	BMP signaling pathway	69	0.0966336	0.357189	GO:0030509
GO:0016442	CC	RISC complex	10	0.0967199	0.357189	GO:0016442
GO:0005154	MF	epidermal growth factor receptor binding	29	0.0969229	0.357205	GO:0005154
GO:0017157	BP	regulation of exocytosis	17	0.0970266	0.357205	GO:0017157
GO:0006635	BP	fatty acid beta-oxidation	36	0.0971573	0.357205	GO:0006635
GO:0030992	CC	intraciliary transport particle B	16	0.0972939	0.357205	GO:0030992
GO:0016070	BP	RNA metabolic process	44	0.0973108	0.357205	GO:0016070
GO:0017146	CC	NMDA selective glutamate receptor complex	11	0.0973281	0.357205	GO:0017146
GO:0010975	BP	regulation of neuron projection development	22	0.0976921	0.358171	GO:0010975
GO:0006307	BP	DNA dealkylation involved in DNA repair	10	0.098207	0.359372	GO:0006307
GO:0042162	MF	telomeric DNA binding	23	0.0983196	0.359372	GO:0042162
GO:0030522	BP	intracellular receptor signaling pathway	34	0.0983235	0.359372	GO:0030522
GO:0070509	BP	calcium ion import	16	0.0987146	0.359887	GO:0070509
GO:0007052	BP	mitotic spindle organization	34	0.0987484	0.359887	GO:0007052
GO:0008637	BP	apoptotic mitochondrial changes	14	0.0989801	0.359887	GO:0008637
GO:0031667	BP	response to nutrient levels	30	0.099106	0.359887	GO:0031667
GO:0010586	BP	miRNA metabolic process	16	0.0993333	0.359887	GO:0010586
GO:0061028	BP	establishment of endothelial barrier	16	0.099414	0.359887	GO:0061028
GO:0031122	BP	cytoplasmic microtubule organization	21	0.0994258	0.359887	GO:0031122
GO:0003214	BP	cardiac left ventricle morphogenesis	10	0.0994782	0.359887	GO:0003214
GO:0070063	MF	RNA polymerase binding	16	0.0994826	0.359887	GO:0070063
GO:0071679	BP	commissural neuron axon guidance	11	0.099497	0.359887	GO:0071679
GO:0003777	MF	microtubule motor activity	31	0.0997741	0.359887	GO:0003777
GO:0022038	BP	corpus callosum development	10	0.0997768	0.359887	GO:0022038
GO:0032435	BP	negative regulation of proteasomal ubiquitin-dependent protein catabolic process	30	0.0998568	0.359887	GO:0032435
GO:0000307	CC	cyclin-dependent protein kinase holoenzyme complex	10	0.0998841	0.359887	GO:0000307
GO:0090037	BP	positive regulation of protein kinase C signaling	10	0.100032	0.359977	GO:0090037
GO:0099524	CC	postsynaptic cytosol	17	0.100189	0.359977	GO:0099524
GO:0060964	BP	regulation of gene silencing by miRNA	81	0.100213	0.359977	GO:0060964
GO:0010738	BP	regulation of protein kinase A signaling	10	0.10041	0.360318	GO:0010738
GO:0045732	BP	positive regulation of protein catabolic process	57	0.100847	0.361521	GO:0045732
GO:2000679	BP	positive regulation of transcription regulatory region DNA binding	16	0.10137	0.362165	GO:2000679
GO:0045445	BP	myoblast differentiation	17	0.101559	0.362165	GO:0045445
GO:0048566	BP	embryonic digestive tract development	16	0.101712	0.362165	GO:0048566
GO:0007080	BP	mitotic metaphase plate congression	36	0.101716	0.362165	GO:0007080
GO:0043406	BP	positive regulation of MAP kinase activity	54	0.101732	0.362165	GO:0043406
GO:0043923	BP	positive regulation by host of viral transcription	17	0.101757	0.362165	GO:0043923
GO:0032008	BP	positive regulation of TOR signaling	32	0.101986	0.362165	GO:0032008
GO:0032060	BP	bleb assembly	10	0.102285	0.362165	GO:0032060
GO:0090398	BP	cellular senescence	24	0.102289	0.362165	GO:0090398
GO:0070262	BP	peptidyl-serine dephosphorylation	10	0.102342	0.362165	GO:0070262
GO:0030279	BP	negative regulation of ossification	17	0.102349	0.362165	GO:0030279
GO:0045880	BP	positive regulation of smoothened signaling pathway	29	0.102358	0.362165	GO:0045880
GO:0008277	BP	regulation of G protein-coupled receptor signaling pathway	40	0.102568	0.362165	GO:0008277
GO:0002479	BP	antigen processing and presentation of exogenous peptide antigen via MHC class I, TAP-dependent	75	0.102663	0.362165	GO:0002479
GO:0001836	BP	release of cytochrome c from mitochondria	20	0.102665	0.362165	GO:0001836
GO:0021904	BP	dorsal/ventral neural tube patterning	10	0.102675	0.362165	GO:0021904
GO:1990907	CC	beta-catenin-TCF complex	10	0.102819	0.362165	GO:1990907
GO:0034098	CC	VCP-NPL4-UFD1 AAA ATPase complex	10	0.102863	0.362165	GO:0034098
GO:0000793	CC	condensed chromosome	23	0.102983	0.362193	GO:0000793
GO:0043407	BP	negative regulation of MAP kinase activity	36	0.103076	0.362193	GO:0043407
GO:0032940	BP	secretion by cell	10	0.10353	0.363378	GO:0032940
GO:0001702	BP	gastrulation with mouth forming second	15	0.103618	0.363378	GO:0001702
GO:0097440	CC	apical dendrite	16	0.10376	0.363519	GO:0097440
GO:1905515	BP	non-motile cilium assembly	39	0.104173	0.363676	GO:1905515
GO:0032588	CC	trans-Golgi network membrane	85	0.104365	0.363676	GO:0032588
GO:0031018	BP	endocrine pancreas development	21	0.104434	0.363676	GO:0031018
GO:0048661	BP	positive regulation of smooth muscle cell proliferation	57	0.10447	0.363676	GO:0048661
GO:0022011	BP	myelination in peripheral nervous system	17	0.104494	0.363676	GO:0022011
GO:0051272	BP	positive regulation of cellular component movement	10	0.104543	0.363676	GO:0051272
GO:0005086	MF	ARF guanyl-nucleotide exchange factor activity	16	0.10461	0.363676	GO:0005086
GO:0021772	BP	olfactory bulb development	17	0.104642	0.363676	GO:0021772
GO:1900153	BP	positive regulation of nuclear-transcribed mRNA catabolic process, deadenylation-dependent decay	15	0.104727	0.363676	GO:1900153
GO:0035729	BP	cellular response to hepatocyte growth factor stimulus	16	0.10495	0.364093	GO:0035729
GO:0008373	MF	sialyltransferase activity	10	0.105266	0.364678	GO:0008373
GO:0031201	CC	SNARE complex	26	0.105324	0.364678	GO:0031201
GO:0051480	BP	regulation of cytosolic calcium ion concentration	30	0.105645	0.365431	GO:0051480
GO:0043401	BP	steroid hormone mediated signaling pathway	52	0.106023	0.36625	GO:0043401
GO:0016571	BP	histone methylation	16	0.106088	0.36625	GO:0016571
GO:0051403	BP	stress-activated MAPK cascade	27	0.106246	0.366441	GO:0051403
GO:0034613	BP	cellular protein localization	37	0.106499	0.366708	GO:0034613
GO:0000070	BP	mitotic sister chromatid segregation	20	0.10653	0.366708	GO:0000070
GO:0030838	BP	positive regulation of actin filament polymerization	43	0.107088	0.367655	GO:0030838
GO:0010507	BP	negative regulation of autophagy	49	0.107098	0.367655	GO:0010507
GO:0048854	BP	brain morphogenesis	18	0.10715	0.367655	GO:0048854
GO:0010944	BP	negative regulation of transcription by competitive promoter binding	10	0.10722	0.367655	GO:0010944
GO:0060324	BP	face development	16	0.107506	0.36828	GO:0060324
GO:0070365	BP	hepatocyte differentiation	10	0.108068	0.369604	GO:0070365
GO:0005680	CC	anaphase-promoting complex	21	0.108101	0.369604	GO:0005680
GO:0048660	BP	regulation of smooth muscle cell proliferation	10	0.108395	0.370254	GO:0048660
GO:0048935	BP	peripheral nervous system neuron development	10	0.108975	0.371877	GO:0048935
GO:0030517	BP	negative regulation of axon extension	15	0.109193	0.372165	GO:0030517
GO:0032402	BP	melanosome transport	19	0.109269	0.372165	GO:0032402
GO:2000049	BP	positive regulation of cell-cell adhesion mediated by cadherin	10	0.10954	0.372681	GO:2000049
GO:0048167	BP	regulation of synaptic plasticity	42	0.10963	0.372681	GO:0048167
GO:0032012	BP	regulation of ARF protein signal transduction	16	0.1101	0.37388	GO:0032012
GO:0003774	MF	motor activity	44	0.110194	0.37388	GO:0003774
GO:0031915	BP	positive regulation of synaptic plasticity	10	0.110376	0.37414	GO:0031915
GO:0007099	BP	centriole replication	14	0.110716	0.37436	GO:0007099
GO:1901741	BP	positive regulation of myoblast fusion	15	0.110889	0.37436	GO:1901741
GO:0035869	CC	ciliary transition zone	22	0.110964	0.37436	GO:0035869
GO:0008408	MF	3'-5' exonuclease activity	13	0.110995	0.37436	GO:0008408
GO:0043627	BP	response to estrogen	61	0.111049	0.37436	GO:0043627
GO:0005721	CC	pericentric heterochromatin	14	0.111074	0.37436	GO:0005721
GO:0000187	BP	activation of MAPK activity	116	0.111381	0.374784	GO:0000187
GO:0007163	BP	establishment or maintenance of cell polarity	22	0.111521	0.374784	GO:0007163
GO:0061077	BP	chaperone-mediated protein folding	21	0.111596	0.374784	GO:0061077
GO:0048477	BP	oogenesis	30	0.111823	0.374784	GO:0048477
GO:0045197	BP	establishment or maintenance of epithelial cell apical/basal polarity	10	0.111878	0.374784	GO:0045197
GO:0031305	CC	integral component of mitochondrial inner membrane	27	0.112004	0.374784	GO:0031305
GO:0090136	BP	epithelial cell-cell adhesion	10	0.11209	0.374784	GO:0090136
GO:0006027	BP	glycosaminoglycan catabolic process	25	0.112113	0.374784	GO:0006027
GO:0034199	BP	activation of protein kinase A activity	17	0.112258	0.374784	GO:0034199
GO:0044305	CC	calyx of Held	23	0.112359	0.374784	GO:0044305
GO:1990841	MF	promoter-specific chromatin binding	46	0.112505	0.374784	GO:1990841
GO:0040014	BP	regulation of multicellular organism growth	27	0.112669	0.374784	GO:0040014
GO:0015918	BP	sterol transport	10	0.112707	0.374784	GO:0015918
GO:0006891	BP	intra-Golgi vesicle-mediated transport	16	0.112764	0.374784	GO:0006891
GO:0016504	MF	peptidase activator activity	10	0.112848	0.374784	GO:0016504
GO:0048484	BP	enteric nervous system development	10	0.112889	0.374784	GO:0048484
GO:0003707	MF	steroid hormone receptor activity	50	0.113259	0.375661	GO:0003707
GO:1905606	BP	regulation of presynapse assembly	27	0.113468	0.375864	GO:1905606
GO:0002020	MF	protease binding	97	0.113532	0.375864	GO:0002020
GO:0002092	BP	positive regulation of receptor internalization	22	0.113824	0.376429	GO:0002092
GO:0070102	BP	interleukin-6-mediated signaling pathway	16	0.113915	0.376429	GO:0070102
GO:1903351	BP	cellular response to dopamine	14	0.114609	0.37837	GO:1903351
GO:0045787	BP	positive regulation of cell cycle	35	0.11532	0.380035	GO:0045787
GO:0097062	BP	dendritic spine maintenance	10	0.115328	0.380035	GO:0097062
GO:0036312	MF	phosphatidylinositol 3-kinase regulatory subunit binding	10	0.115623	0.380654	GO:0036312
GO:0040029	BP	regulation of gene expression, epigenetic	14	0.115772	0.380793	GO:0040029
GO:0016787	MF	hydrolase activity	71	0.116274	0.382088	GO:0016787
GO:0030276	MF	clathrin binding	22	0.116845	0.383611	GO:0030276
GO:0000062	MF	fatty-acyl-CoA binding	15	0.117109	0.384121	GO:0000062
GO:0000775	CC	chromosome, centromeric region	52	0.11773	0.385632	GO:0000775
GO:0043560	MF	insulin receptor substrate binding	10	0.117896	0.385632	GO:0043560
GO:0070016	MF	armadillo repeat domain binding	10	0.118089	0.385632	GO:0070016
GO:0014850	BP	response to muscle activity	21	0.11811	0.385632	GO:0014850
GO:0070050	BP	neuron cellular homeostasis	15	0.118155	0.385632	GO:0070050
GO:0002076	BP	osteoblast development	16	0.118221	0.385632	GO:0002076
GO:0070317	BP	negative regulation of G0 to G1 transition	41	0.118488	0.385928	GO:0070317
GO:0004712	MF	protein serine/threonine/tyrosine kinase activity	29	0.11853	0.385928	GO:0004712
GO:0035970	BP	peptidyl-threonine dephosphorylation	16	0.119208	0.38778	GO:0035970
GO:0006306	BP	DNA methylation	22	0.11963	0.388797	GO:0006306
GO:0035458	BP	cellular response to interferon-beta	19	0.119763	0.388874	GO:0035458
GO:0044224	CC	juxtaparanode region of axon	10	0.119922	0.389033	GO:0044224
GO:0008584	BP	male gonad development	91	0.120034	0.389042	GO:0008584
GO:0045022	BP	early endosome to late endosome transport	22	0.120329	0.38962	GO:0045022
GO:0010765	BP	positive regulation of sodium ion transport	15	0.120432	0.38962	GO:0010765
GO:0000900	MF	translation repressor activity, mRNA regulatory element binding	14	0.120631	0.38991	GO:0000900
GO:0000375	BP	RNA splicing, via transesterification reactions	25	0.120856	0.390021	GO:0000375
GO:0007281	BP	germ cell development	32	0.120886	0.390021	GO:0007281
GO:0045295	MF	gamma-catenin binding	10	0.121266	0.390892	GO:0045295
GO:0008654	BP	phospholipid biosynthetic process	22	0.122085	0.392454	GO:0008654
GO:0003725	MF	double-stranded RNA binding	59	0.122153	0.392454	GO:0003725
GO:0000083	BP	regulation of transcription involved in G1/S transition of mitotic cell cycle	24	0.122177	0.392454	GO:0000083
GO:0007076	BP	mitotic chromosome condensation	15	0.122193	0.392454	GO:0007076
GO:0006839	BP	mitochondrial transport	14	0.122346	0.392593	GO:0006839
GO:0090502	BP	RNA phosphodiester bond hydrolysis, endonucleolytic	63	0.122525	0.392812	GO:0090502
GO:0000166	MF	nucleotide binding	59	0.123588	0.395692	GO:0000166
GO:0001741	CC	XY body	13	0.123647	0.395692	GO:0001741
GO:0044295	CC	axonal growth cone	28	0.124027	0.396216	GO:0044295
GO:0042789	BP	mRNA transcription by RNA polymerase II	18	0.124039	0.396216	GO:0042789
GO:0001158	MF	enhancer sequence-specific DNA binding	23	0.124145	0.396216	GO:0001158
GO:0010800	BP	positive regulation of peptidyl-threonine phosphorylation	29	0.124641	0.397288	GO:0010800
GO:0007016	BP	cytoskeletal anchoring at plasma membrane	10	0.124705	0.397288	GO:0007016
GO:0071333	BP	cellular response to glucose stimulus	64	0.124963	0.397352	GO:0071333
GO:0008066	MF	glutamate receptor activity	10	0.125228	0.397352	GO:0008066
GO:0034704	CC	calcium channel complex	22	0.125242	0.397352	GO:0034704
GO:0048873	BP	homeostasis of number of cells within a tissue	28	0.125246	0.397352	GO:0048873
GO:0051018	MF	protein kinase A binding	23	0.125285	0.397352	GO:0051018
GO:0005912	CC	adherens junction	55	0.125455	0.397535	GO:0005912
GO:0031083	CC	BLOC-1 complex	14	0.125663	0.397708	GO:0031083
GO:0005248	MF	voltage-gated sodium channel activity	16	0.125734	0.397708	GO:0005248
GO:0033617	BP	mitochondrial respiratory chain complex IV assembly	15	0.126149	0.398668	GO:0033617
GO:0016578	BP	histone deubiquitination	13	0.126293	0.398766	GO:0016578
GO:0005978	BP	glycogen biosynthetic process	19	0.12642	0.398813	GO:0005978
GO:1901653	BP	cellular response to peptide	14	0.126685	0.399292	GO:1901653
GO:0061608	MF	nuclear import signal receptor activity	15	0.126983	0.3996	GO:0061608
GO:0006687	BP	glycosphingolipid metabolic process	40	0.127128	0.3996	GO:0006687
GO:0038007	BP	netrin-activated signaling pathway	10	0.127221	0.3996	GO:0038007
GO:0016323	CC	basolateral plasma membrane	178	0.127355	0.3996	GO:0016323
GO:2000573	BP	positive regulation of DNA biosynthetic process	15	0.127371	0.3996	GO:2000573
GO:0005763	CC	mitochondrial small ribosomal subunit	27	0.12752	0.3996	GO:0005763
GO:0046655	BP	folic acid metabolic process	19	0.127683	0.3996	GO:0046655
GO:0006370	BP	7-methylguanosine mRNA capping	33	0.127729	0.3996	GO:0006370
GO:0046579	BP	positive regulation of Ras protein signal transduction	29	0.127853	0.3996	GO:0046579
GO:0035035	MF	histone acetyltransferase binding	26	0.127908	0.3996	GO:0035035
GO:0045111	CC	intermediate filament cytoskeleton	47	0.128471	0.401007	GO:0045111
GO:0005104	MF	fibroblast growth factor receptor binding	21	0.128903	0.401755	GO:0005104
GO:0046835	BP	carbohydrate phosphorylation	21	0.128938	0.401755	GO:0046835
GO:0070935	BP	3'-UTR-mediated mRNA stabilization	12	0.129092	0.401882	GO:0070935
GO:0008542	BP	visual learning	47	0.129374	0.402297	GO:0008542
GO:0001833	BP	inner cell mass cell proliferation	13	0.129451	0.402297	GO:0001833
GO:0008344	BP	adult locomotory behavior	47	0.12994	0.403463	GO:0008344
GO:0005903	CC	brush border	49	0.130216	0.403966	GO:0005903
GO:1903955	BP	positive regulation of protein targeting to mitochondrion	31	0.13039	0.404151	GO:1903955
GO:0010494	CC	cytoplasmic stress granule	55	0.130555	0.40431	GO:0010494
GO:0051899	BP	membrane depolarization	22	0.131002	0.40517	GO:0051899
GO:1903508	BP	positive regulation of nucleic acid-templated transcription	83	0.131061	0.40517	GO:1903508
GO:0030513	BP	positive regulation of BMP signaling pathway	31	0.131682	0.406271	GO:0030513
GO:0000421	CC	autophagosome membrane	26	0.131712	0.406271	GO:0000421
GO:0030139	CC	endocytic vesicle	49	0.13185	0.406271	GO:0030139
GO:0000976	MF	transcription regulatory region sequence-specific DNA binding	38	0.131875	0.406271	GO:0000976
GO:0004526	MF	ribonuclease P activity	12	0.132406	0.407554	GO:0004526
GO:0030695	MF	GTPase regulator activity	14	0.132701	0.407755	GO:0030695
GO:0036503	BP	ERAD pathway	15	0.132701	0.407755	GO:0036503
GO:0007517	BP	muscle organ development	91	0.132939	0.408133	GO:0007517
GO:0071902	BP	positive regulation of protein serine/threonine kinase activity	47	0.133566	0.409407	GO:0071902
GO:0051289	BP	protein homotetramerization	87	0.133585	0.409407	GO:0051289
GO:0035255	MF	ionotropic glutamate receptor binding	26	0.133908	0.409689	GO:0035255
GO:0016235	CC	aggresome	42	0.133908	0.409689	GO:0016235
GO:0071889	MF	14-3-3 protein binding	30	0.134219	0.410288	GO:0071889
GO:0043069	BP	negative regulation of programmed cell death	15	0.134789	0.410967	GO:0043069
GO:0005200	MF	structural constituent of cytoskeleton	77	0.134863	0.410967	GO:0005200
GO:0050885	BP	neuromuscular process controlling balance	44	0.134929	0.410967	GO:0050885
GO:0030433	BP	ubiquitin-dependent ERAD pathway	49	0.135114	0.410967	GO:0030433
GO:0050699	MF	WW domain binding	21	0.135145	0.410967	GO:0050699
GO:0042176	BP	regulation of protein catabolic process	16	0.135192	0.410967	GO:0042176
GO:1902236	BP	negative regulation of endoplasmic reticulum stress-induced intrinsic apoptotic signaling pathway	19	0.135252	0.410967	GO:1902236
GO:1901673	BP	regulation of mitotic spindle assembly	20	0.135618	0.411704	GO:1901673
GO:0043525	BP	positive regulation of neuron apoptotic process	53	0.135794	0.411704	GO:0043525
GO:0034389	BP	lipid droplet organization	19	0.135843	0.411704	GO:0034389
GO:0006289	BP	nucleotide-excision repair	29	0.13656	0.413524	GO:0006289
GO:0030175	CC	filopodium	67	0.136885	0.414155	GO:0030175
GO:0007004	BP	telomere maintenance via telomerase	18	0.137635	0.416021	GO:0007004
GO:0008378	MF	galactosyltransferase activity	18	0.137856	0.416021	GO:0008378
GO:0051017	BP	actin filament bundle assembly	23	0.137943	0.416021	GO:0051017
GO:0046426	BP	negative regulation of JAK-STAT cascade	17	0.138072	0.416021	GO:0046426
GO:0030515	MF	snoRNA binding	13	0.138176	0.416021	GO:0030515
GO:0007129	BP	synapsis	18	0.138205	0.416021	GO:0007129
GO:0035269	BP	protein O-linked mannosylation	18	0.138799	0.417456	GO:0035269
GO:0001958	BP	endochondral ossification	27	0.13912	0.418068	GO:0001958
GO:0043024	MF	ribosomal small subunit binding	12	0.139561	0.418471	GO:0043024
GO:0050965	BP	detection of temperature stimulus involved in sensory perception of pain	15	0.1397	0.418471	GO:0050965
GO:0005001	MF	transmembrane receptor protein tyrosine phosphatase activity	17	0.139816	0.418471	GO:0005001
GO:0046686	BP	response to cadmium ion	24	0.13983	0.418471	GO:0046686
GO:0006796	BP	phosphate-containing compound metabolic process	15	0.139844	0.418471	GO:0006796
GO:0001964	BP	startle response	13	0.140001	0.418589	GO:0001964
GO:0022008	BP	neurogenesis	31	0.140144	0.418614	GO:0022008
GO:0033146	BP	regulation of intracellular estrogen receptor signaling pathway	15	0.140246	0.418614	GO:0033146
GO:0045862	BP	positive regulation of proteolysis	19	0.140583	0.418885	GO:0045862
GO:0000118	CC	histone deacetylase complex	29	0.14065	0.418885	GO:0000118
GO:1903543	BP	positive regulation of exosomal secretion	15	0.140808	0.418885	GO:1903543
GO:0031314	CC	extrinsic component of mitochondrial inner membrane	11	0.140809	0.418885	GO:0031314
GO:0043277	BP	apoptotic cell clearance	19	0.141211	0.418891	GO:0043277
GO:0035371	CC	microtubule plus-end	16	0.141272	0.418891	GO:0035371
GO:0030334	BP	regulation of cell migration	64	0.14144	0.418891	GO:0030334
GO:0045471	BP	response to ethanol	104	0.141448	0.418891	GO:0045471
GO:0030217	BP	T cell differentiation	32	0.14149	0.418891	GO:0030217
GO:0045177	CC	apical part of cell	70	0.141519	0.418891	GO:0045177
GO:0003712	MF	transcription coregulator activity	60	0.141801	0.419376	GO:0003712
GO:0015012	BP	heparan sulfate proteoglycan biosynthetic process	14	0.142481	0.420734	GO:0015012
GO:0030837	BP	negative regulation of actin filament polymerization	14	0.142497	0.420734	GO:0030837
GO:0045616	BP	regulation of keratinocyte differentiation	17	0.142815	0.421323	GO:0045616
GO:0005881	CC	cytoplasmic microtubule	46	0.143212	0.422141	GO:0005881
GO:0008023	CC	transcription elongation factor complex	21	0.143612	0.422724	GO:0008023
GO:0051492	BP	regulation of stress fiber assembly	14	0.143706	0.422724	GO:0051492
GO:0005847	CC	mRNA cleavage and polyadenylation specificity factor complex	12	0.143767	0.422724	GO:0005847
GO:0019725	BP	cellular homeostasis	14	0.14395	0.422913	GO:0019725
GO:0015914	BP	phospholipid transport	21	0.144619	0.423695	GO:0015914
GO:0043202	CC	lysosomal lumen	92	0.144621	0.423695	GO:0043202
GO:0051604	BP	protein maturation	13	0.144841	0.423695	GO:0051604
GO:0050690	BP	regulation of defense response to virus by virus	27	0.144922	0.423695	GO:0050690
GO:0031258	CC	lamellipodium membrane	22	0.144967	0.423695	GO:0031258
GO:0015030	CC	Cajal body	71	0.145026	0.423695	GO:0015030
GO:0097202	BP	activation of cysteine-type endopeptidase activity	14	0.1452	0.423695	GO:0097202
GO:0006165	BP	nucleoside diphosphate phosphorylation	18	0.145271	0.423695	GO:0006165
GO:0072546	CC	ER membrane protein complex	10	0.145291	0.423695	GO:0072546
GO:0010259	BP	multicellular organism aging	18	0.145654	0.424405	GO:0010259
GO:0030169	MF	low-density lipoprotein particle binding	15	0.146081	0.424855	GO:0030169
GO:0030902	BP	hindbrain development	16	0.146092	0.424855	GO:0030902
GO:0045638	BP	negative regulation of myeloid cell differentiation	18	0.14627	0.424855	GO:0045638
GO:1990126	BP	retrograde transport, endosome to plasma membrane	17	0.146287	0.424855	GO:1990126
GO:0010369	CC	chromocenter	12	0.14671	0.425736	GO:0010369
GO:0071560	BP	cellular response to transforming growth factor beta stimulus	56	0.14695	0.426084	GO:0071560
GO:0021549	BP	cerebellum development	46	0.147358	0.426918	GO:0021549
GO:0043551	BP	regulation of phosphatidylinositol 3-kinase activity	15	0.147928	0.428218	GO:0043551
GO:0010824	BP	regulation of centrosome duplication	18	0.148061	0.428255	GO:0010824
GO:0051491	BP	positive regulation of filopodium assembly	30	0.148285	0.428553	GO:0051491
GO:0035925	MF	mRNA 3'-UTR AU-rich region binding	25	0.148518	0.428876	GO:0035925
GO:0032088	BP	negative regulation of NF-kappaB transcription factor activity	85	0.149405	0.43092	GO:0032088
GO:0009083	BP	branched-chain amino acid catabolic process	19	0.149528	0.43092	GO:0009083
GO:0120163	BP	negative regulation of cold-induced thermogenesis	47	0.149688	0.43092	GO:0120163
GO:0030194	BP	positive regulation of blood coagulation	14	0.149917	0.43092	GO:0030194
GO:0044389	MF	ubiquitin-like protein ligase binding	19	0.150039	0.43092	GO:0044389
GO:0005868	CC	cytoplasmic dynein complex	17	0.150059	0.43092	GO:0005868
GO:0072583	BP	clathrin-dependent endocytosis	21	0.150186	0.43092	GO:0072583
GO:0072657	BP	protein localization to membrane	15	0.150197	0.43092	GO:0072657
GO:0017022	MF	myosin binding	19	0.150653	0.431278	GO:0017022
GO:0035176	BP	social behavior	50	0.150864	0.431278	GO:0035176
GO:0043394	MF	proteoglycan binding	14	0.150865	0.431278	GO:0043394
GO:0042551	BP	neuron maturation	13	0.150868	0.431278	GO:0042551
GO:0031623	BP	receptor internalization	38	0.150929	0.431278	GO:0031623
GO:0030126	CC	COPI vesicle coat	13	0.151197	0.431697	GO:0030126
GO:0006661	BP	phosphatidylinositol biosynthetic process	76	0.151489	0.432181	GO:0006661
GO:0007213	BP	G protein-coupled acetylcholine receptor signaling pathway	15	0.152238	0.433971	GO:0007213
GO:0070006	MF	metalloaminopeptidase activity	14	0.152773	0.434512	GO:0070006
GO:0008156	BP	negative regulation of DNA replication	18	0.153065	0.434512	GO:0008156
GO:0006913	BP	nucleocytoplasmic transport	17	0.153097	0.434512	GO:0006913
GO:0046889	BP	positive regulation of lipid biosynthetic process	13	0.153145	0.434512	GO:0046889
GO:0030173	CC	integral component of Golgi membrane	35	0.153251	0.434512	GO:0030173
GO:0016018	MF	cyclosporin A binding	13	0.153258	0.434512	GO:0016018
GO:1900273	BP	positive regulation of long-term synaptic potentiation	22	0.153285	0.434512	GO:1900273
GO:0002028	BP	regulation of sodium ion transport	15	0.153741	0.435457	GO:0002028
GO:0035145	CC	exon-exon junction complex	19	0.153899	0.435557	GO:0035145
GO:0000407	CC	phagophore assembly site	13	0.154102	0.43563	GO:0000407
GO:0000381	BP	regulation of alternative mRNA splicing, via spliceosome	41	0.154171	0.43563	GO:0000381
GO:0003678	MF	DNA helicase activity	14	0.15452	0.436271	GO:0003678
GO:0000387	BP	spliceosomal snRNP assembly	27	0.154885	0.436954	GO:0000387
GO:0033673	BP	negative regulation of kinase activity	13	0.155089	0.43718	GO:0033673
GO:0010996	BP	response to auditory stimulus	13	0.155429	0.437701	GO:0010996
GO:0051602	BP	response to electrical stimulus	28	0.155572	0.437701	GO:0051602
GO:0090181	BP	regulation of cholesterol metabolic process	13	0.155644	0.437701	GO:0090181
GO:0046940	BP	nucleoside monophosphate phosphorylation	13	0.1563	0.439199	GO:0046940
GO:0035196	BP	production of miRNAs involved in gene silencing by miRNA	14	0.156732	0.439812	GO:0035196
GO:0000794	CC	condensed nuclear chromosome	27	0.156857	0.439812	GO:0000794
GO:0030833	BP	regulation of actin filament polymerization	12	0.156993	0.439812	GO:0030833
GO:0042177	BP	negative regulation of protein catabolic process	35	0.157014	0.439812	GO:0042177
GO:0009650	BP	UV protection	13	0.157399	0.44015	GO:0009650
GO:0004550	MF	nucleoside diphosphate kinase activity	14	0.157421	0.44015	GO:0004550
GO:0055007	BP	cardiac muscle cell differentiation	21	0.157506	0.44015	GO:0055007
GO:0000266	BP	mitochondrial fission	13	0.157968	0.440717	GO:0000266
GO:0030220	BP	platelet formation	19	0.157978	0.440717	GO:0030220
GO:0097421	BP	liver regeneration	32	0.158082	0.440717	GO:0097421
GO:0044615	CC	nuclear pore nuclear basket	11	0.158655	0.441647	GO:0044615
GO:0072332	BP	intrinsic apoptotic signaling pathway by p53 class mediator	23	0.158665	0.441647	GO:0072332
GO:0035774	BP	positive regulation of insulin secretion involved in cellular response to glucose stimulus	31	0.159062	0.442406	GO:0035774
GO:0004407	MF	histone deacetylase activity	18	0.159724	0.443445	GO:0004407
GO:0043433	BP	negative regulation of DNA-binding transcription factor activity	73	0.159775	0.443445	GO:0043433
GO:0045190	BP	isotype switching	17	0.159812	0.443445	GO:0045190
GO:0043295	MF	glutathione binding	11	0.159935	0.443445	GO:0043295
GO:0001708	BP	cell fate specification	14	0.160335	0.444084	GO:0001708
GO:0019216	BP	regulation of lipid metabolic process	86	0.160488	0.444084	GO:0019216
GO:0030285	CC	integral component of synaptic vesicle membrane	29	0.160549	0.444084	GO:0030285
GO:0050790	BP	regulation of catalytic activity	48	0.160666	0.444084	GO:0050790
GO:0032515	BP	negative regulation of phosphoprotein phosphatase activity	48	0.160835	0.444205	GO:0032515
GO:0043198	CC	dendritic shaft	36	0.161407	0.44515	GO:0043198
GO:0010390	BP	histone monoubiquitination	12	0.161524	0.44515	GO:0010390
GO:0042060	BP	wound healing	74	0.161553	0.44515	GO:0042060
GO:0021762	BP	substantia nigra development	43	0.161996	0.445782	GO:0021762
GO:0009303	BP	rRNA transcription	13	0.162034	0.445782	GO:0009303
GO:0007520	BP	myoblast fusion	19	0.162376	0.446333	GO:0007520
GO:0017048	MF	Rho GTPase binding	30	0.162486	0.446333	GO:0017048
GO:0048169	BP	regulation of long-term neuronal synaptic plasticity	20	0.163653	0.448996	GO:0048169
GO:0001664	MF	G protein-coupled receptor binding	41	0.163708	0.448996	GO:0001664
GO:0010288	BP	response to lead ion	19	0.164195	0.449642	GO:0010288
GO:0034097	BP	response to cytokine	38	0.164223	0.449642	GO:0034097
GO:0005980	BP	glycogen catabolic process	16	0.164324	0.449642	GO:0005980
GO:0006493	BP	protein O-linked glycosylation	36	0.164493	0.449688	GO:0006493
GO:0004861	MF	cyclin-dependent protein serine/threonine kinase inhibitor activity	12	0.164594	0.449688	GO:0004861
GO:0005923	CC	bicellular tight junction	118	0.165047	0.450579	GO:0005923
GO:0060384	BP	innervation	20	0.1655	0.451468	GO:0060384
GO:0005161	MF	platelet-derived growth factor receptor binding	14	0.165654	0.451541	GO:0005161
GO:0080009	BP	mRNA methylation	13	0.165848	0.451724	GO:0080009
GO:0051560	BP	mitochondrial calcium ion homeostasis	13	0.1661	0.452062	GO:0051560
GO:0030148	BP	sphingolipid biosynthetic process	43	0.166229	0.452066	GO:0030148
GO:0030018	CC	Z disc	106	0.166581	0.452401	GO:0030018
GO:0009898	CC	cytoplasmic side of plasma membrane	50	0.166685	0.452401	GO:0009898
GO:0045860	BP	positive regulation of protein kinase activity	50	0.166734	0.452401	GO:0045860
GO:0003755	MF	peptidyl-prolyl cis-trans isomerase activity	26	0.167794	0.454929	GO:0003755
GO:1900272	BP	negative regulation of long-term synaptic potentiation	13	0.168005	0.455152	GO:1900272
GO:0043523	BP	regulation of neuron apoptotic process	18	0.168245	0.455454	GO:0043523
GO:0048485	BP	sympathetic nervous system development	15	0.170586	0.461117	GO:0048485
GO:0004708	MF	MAP kinase kinase activity	13	0.170798	0.461117	GO:0004708
GO:0035024	BP	negative regulation of Rho protein signal transduction	21	0.170898	0.461117	GO:0035024
GO:0030552	MF	cAMP binding	20	0.171139	0.461117	GO:0030552
GO:0048709	BP	oligodendrocyte differentiation	24	0.171203	0.461117	GO:0048709
GO:0022904	BP	respiratory electron transport chain	13	0.171236	0.461117	GO:0022904
GO:0032968	BP	positive regulation of transcription elongation from RNA polymerase II promoter	12	0.171376	0.461117	GO:0032968
GO:0022010	BP	central nervous system myelination	13	0.171376	0.461117	GO:0022010
GO:0017160	MF	Ral GTPase binding	12	0.171575	0.461303	GO:0017160
GO:0006893	BP	Golgi to plasma membrane transport	13	0.172058	0.462144	GO:0006893
GO:0033268	CC	node of Ranvier	15	0.172321	0.462144	GO:0033268
GO:0001968	MF	fibronectin binding	24	0.172332	0.462144	GO:0001968
GO:0042254	BP	ribosome biogenesis	24	0.172409	0.462144	GO:0042254
GO:0004843	MF	thiol-dependent ubiquitin-specific protease activity	73	0.172602	0.462313	GO:0004843
GO:0007416	BP	synapse assembly	59	0.172839	0.462597	GO:0007416
GO:0032794	MF	GTPase activating protein binding	15	0.173526	0.463749	GO:0032794
GO:0051489	BP	regulation of filopodium assembly	12	0.173532	0.463749	GO:0051489
GO:0006241	BP	CTP biosynthetic process	10	0.173661	0.463749	GO:0006241
GO:0034394	BP	protein localization to cell surface	22	0.174334	0.465198	GO:0034394
GO:0030371	MF	translation repressor activity	10	0.174468	0.465204	GO:0030371
GO:0019886	BP	antigen processing and presentation of exogenous peptide antigen via MHC class II	97	0.174951	0.465992	GO:0019886
GO:0031638	BP	zymogen activation	11	0.175026	0.465992	GO:0031638
GO:1904659	BP	glucose transmembrane transport	23	0.175549	0.467034	GO:1904659
GO:0043194	CC	axon initial segment	15	0.17613	0.468229	GO:0043194
GO:0060038	BP	cardiac muscle cell proliferation	13	0.176866	0.469834	GO:0060038
GO:0008144	MF	drug binding	58	0.177277	0.470573	GO:0008144
GO:0000422	BP	autophagy of mitochondrion	17	0.178004	0.472149	GO:0000422
GO:0033148	BP	positive regulation of intracellular estrogen receptor signaling pathway	11	0.178391	0.472824	GO:0033148
GO:0016592	CC	mediator complex	24	0.178541	0.472868	GO:0016592
GO:0016491	MF	oxidoreductase activity	76	0.178689	0.472906	GO:0016491
GO:1901222	BP	regulation of NIK/NF-kappaB signaling	11	0.178846	0.47297	GO:1901222
GO:0005666	CC	RNA polymerase III complex	10	0.179003	0.473033	GO:0005666
GO:0045766	BP	positive regulation of angiogenesis	147	0.179224	0.473204	GO:0045766
GO:0031091	CC	platelet alpha granule	14	0.179711	0.473204	GO:0031091
GO:0070374	BP	positive regulation of ERK1 and ERK2 cascade	184	0.179895	0.473204	GO:0070374
GO:0071850	BP	mitotic cell cycle arrest	13	0.179983	0.473204	GO:0071850
GO:0007088	BP	regulation of mitotic nuclear division	19	0.180009	0.473204	GO:0007088
GO:0046328	BP	regulation of JNK cascade	15	0.180056	0.473204	GO:0046328
GO:0031226	CC	intrinsic component of plasma membrane	37	0.180067	0.473204	GO:0031226
GO:0003184	BP	pulmonary valve morphogenesis	15	0.180137	0.473204	GO:0003184
GO:0000149	MF	SNARE binding	20	0.180479	0.473204	GO:0000149
GO:0045182	MF	translation regulator activity	13	0.180489	0.473204	GO:0045182
GO:0043046	BP	DNA methylation involved in gamete generation	20	0.180767	0.473204	GO:0043046
GO:0030674	MF	protein binding, bridging	72	0.180798	0.473204	GO:0030674
GO:0002040	BP	sprouting angiogenesis	20	0.180869	0.473204	GO:0002040
GO:0106074	BP	aminoacyl-tRNA metabolism involved in translational fidelity	13	0.180935	0.473204	GO:0106074
GO:0008047	MF	enzyme activator activity	45	0.181663	0.474516	GO:0008047
GO:0006400	BP	tRNA modification	25	0.181922	0.474516	GO:0006400
GO:0009168	BP	purine ribonucleoside monophosphate biosynthetic process	13	0.182035	0.474516	GO:0009168
GO:0061631	MF	ubiquitin conjugating enzyme activity	21	0.182243	0.474516	GO:0061631
GO:0001085	MF	RNA polymerase II transcription factor binding	42	0.182272	0.474516	GO:0001085
GO:0006479	BP	protein methylation	28	0.18233	0.474516	GO:0006479
GO:0070885	BP	negative regulation of calcineurin-NFAT signaling cascade	17	0.182666	0.474516	GO:0070885
GO:0004697	MF	protein kinase C activity	15	0.182678	0.474516	GO:0004697
GO:0042445	BP	hormone metabolic process	13	0.18278	0.474516	GO:0042445
GO:0006293	BP	nucleotide-excision repair, preincision complex stabilization	21	0.182907	0.474516	GO:0006293
GO:0006295	BP	nucleotide-excision repair, DNA incision, 3'-to lesion	21	0.182907	0.474516	GO:0006295
GO:0001508	BP	action potential	14	0.183136	0.474763	GO:0001508
GO:0001829	BP	trophectodermal cell differentiation	13	0.184537	0.477599	GO:0001829
GO:0042532	BP	negative regulation of tyrosine phosphorylation of STAT protein	13	0.18474	0.477599	GO:0042532
GO:0032420	CC	stereocilium	33	0.184761	0.477599	GO:0032420
GO:0120162	BP	positive regulation of cold-induced thermogenesis	97	0.184769	0.477599	GO:0120162
GO:0090734	CC	site of DNA damage	17	0.18501	0.477599	GO:0090734
GO:0098656	BP	anion transmembrane transport	19	0.185038	0.477599	GO:0098656
GO:0010820	BP	positive regulation of T cell chemotaxis	14	0.185227	0.477741	GO:0010820
GO:0030511	BP	positive regulation of transforming growth factor beta receptor signaling pathway	28	0.186141	0.479608	GO:0030511
GO:0030673	CC	axolemma	15	0.186221	0.479608	GO:0030673
GO:1900006	BP	positive regulation of dendrite development	14	0.186869	0.480928	GO:1900006
GO:0015293	MF	symporter activity	42	0.18759	0.482432	GO:0015293
GO:0031996	MF	thioesterase binding	11	0.187869	0.4828	GO:0031996
GO:0009411	BP	response to UV	40	0.188318	0.483422	GO:0009411
GO:0002052	BP	positive regulation of neuroblast proliferation	20	0.188383	0.483422	GO:0002052
GO:0008219	BP	cell death	35	0.188566	0.48354	GO:0008219
GO:0048593	BP	camera-type eye morphogenesis	18	0.188989	0.483982	GO:0048593
GO:0030330	BP	DNA damage response, signal transduction by p53 class mediator	17	0.189259	0.483982	GO:0030330
GO:0010634	BP	positive regulation of epithelial cell migration	37	0.189265	0.483982	GO:0010634
GO:0031047	BP	gene silencing by RNA	34	0.189283	0.483982	GO:0031047
GO:0032967	BP	positive regulation of collagen biosynthetic process	26	0.189426	0.483999	GO:0032967
GO:0036342	BP	post-anal tail morphogenesis	18	0.190581	0.486148	GO:0036342
GO:0048188	CC	Set1C/COMPASS complex	11	0.190678	0.486148	GO:0048188
GO:0060389	BP	pathway-restricted SMAD protein phosphorylation	13	0.190678	0.486148	GO:0060389
GO:0045410	BP	positive regulation of interleukin-6 biosynthetic process	12	0.191588	0.487844	GO:0045410
GO:1904851	BP	positive regulation of establishment of protein localization to telomere	10	0.191763	0.487844	GO:1904851
GO:0007623	BP	circadian rhythm	68	0.191976	0.487844	GO:0007623
GO:0005158	MF	insulin receptor binding	20	0.192032	0.487844	GO:0005158
GO:0005845	CC	mRNA cap binding complex	11	0.192097	0.487844	GO:0005845
GO:0034380	BP	high-density lipoprotein particle assembly	11	0.192168	0.487844	GO:0034380
GO:0032956	BP	regulation of actin cytoskeleton organization	49	0.192457	0.488226	GO:0032956
GO:0033365	BP	protein localization to organelle	14	0.193257	0.489907	GO:0033365
GO:0014059	BP	regulation of dopamine secretion	12	0.194294	0.491836	GO:0014059
GO:0032839	CC	dendrite cytoplasm	29	0.194309	0.491836	GO:0032839
GO:0004535	MF	poly(A)-specific ribonuclease activity	13	0.194434	0.491836	GO:0004535
GO:0022624	CC	proteasome accessory complex	17	0.194659	0.492055	GO:0022624
GO:0046949	BP	fatty-acyl-CoA biosynthetic process	12	0.194834	0.492089	GO:0046949
GO:0005109	MF	frizzled binding	22	0.19495	0.492089	GO:0005109
GO:0045648	BP	positive regulation of erythrocyte differentiation	30	0.195419	0.492625	GO:0045648
GO:0010468	BP	regulation of gene expression	102	0.19544	0.492625	GO:0010468
GO:0001682	BP	tRNA 5'-leader removal	11	0.195724	0.492777	GO:0001682
GO:0002024	BP	diet induced thermogenesis	11	0.19591	0.492777	GO:0002024
GO:0009416	BP	response to light stimulus	18	0.195917	0.492777	GO:0009416
GO:0007205	BP	protein kinase C-activating G protein-coupled receptor signaling pathway	26	0.196527	0.493712	GO:0007205
GO:1902895	BP	positive regulation of pri-miRNA transcription by RNA polymerase II	30	0.196612	0.493712	GO:1902895
GO:0046966	MF	thyroid hormone receptor binding	27	0.196706	0.493712	GO:0046966
GO:0071339	CC	MLL1 complex	29	0.197268	0.494002	GO:0071339
GO:0007160	BP	cell-matrix adhesion	82	0.197426	0.494002	GO:0007160
GO:0017075	MF	syntaxin-1 binding	19	0.197509	0.494002	GO:0017075
GO:0007094	BP	mitotic spindle assembly checkpoint	18	0.197666	0.494002	GO:0007094
GO:0034362	CC	low-density lipoprotein particle	14	0.197799	0.494002	GO:0034362
GO:0006294	BP	nucleotide-excision repair, preincision complex assembly	29	0.19783	0.494002	GO:0006294
GO:0006695	BP	cholesterol biosynthetic process	37	0.197981	0.494002	GO:0006695
GO:0000979	MF	RNA polymerase II core promoter sequence-specific DNA binding	21	0.198029	0.494002	GO:0000979
GO:0055089	BP	fatty acid homeostasis	15	0.19832	0.494002	GO:0055089
GO:0051092	BP	positive regulation of NF-kappaB transcription factor activity	149	0.198322	0.494002	GO:0051092
GO:0010862	BP	positive regulation of pathway-restricted SMAD protein phosphorylation	30	0.198519	0.494002	GO:0010862
GO:0044782	BP	cilium organization	11	0.198559	0.494002	GO:0044782
GO:0051287	MF	NAD binding	37	0.198631	0.494002	GO:0051287
GO:0035909	BP	aorta morphogenesis	14	0.198962	0.494479	GO:0035909
GO:0001503	BP	ossification	70	0.199387	0.495188	GO:0001503
GO:2000649	BP	regulation of sodium ion transmembrane transporter activity	12	0.19963	0.495229	GO:2000649
GO:0060339	BP	negative regulation of type I interferon-mediated signaling pathway	11	0.199682	0.495229	GO:0060339
GO:0017156	BP	calcium ion regulated exocytosis	12	0.199873	0.495355	GO:0017156
GO:1900029	BP	positive regulation of ruffle assembly	13	0.20011	0.495472	GO:1900029
GO:0043001	BP	Golgi to plasma membrane protein transport	23	0.200199	0.495472	GO:0043001
GO:0021983	BP	pituitary gland development	27	0.201242	0.497676	GO:0021983
GO:0043200	BP	response to amino acid	27	0.20137	0.497676	GO:0043200
GO:0000186	BP	activation of MAPKK activity	39	0.201834	0.497689	GO:0000186
GO:0005669	CC	transcription factor TFIID complex	32	0.202004	0.497689	GO:0005669
GO:0060287	BP	epithelial cilium movement involved in determination of left/right asymmetry	10	0.202123	0.497689	GO:0060287
GO:0099060	CC	integral component of postsynaptic specialization membrane	25	0.202154	0.497689	GO:0099060
GO:0043588	BP	skin development	34	0.202183	0.497689	GO:0043588
GO:0003215	BP	cardiac right ventricle morphogenesis	13	0.202217	0.497689	GO:0003215
GO:0006111	BP	regulation of gluconeogenesis	11	0.202536	0.49813	GO:0006111
GO:0099523	CC	presynaptic cytosol	13	0.203324	0.499588	GO:0099523
GO:0030159	MF	receptor signaling complex scaffold activity	18	0.203622	0.499588	GO:0030159
GO:0060326	BP	cell chemotaxis	41	0.203635	0.499588	GO:0060326
GO:0071260	BP	cellular response to mechanical stimulus	77	0.203802	0.499588	GO:0071260
GO:0007032	BP	endosome organization	32	0.203833	0.499588	GO:0007032
GO:0007175	BP	negative regulation of epidermal growth factor-activated receptor activity	12	0.203984	0.499613	GO:0007175
GO:0006353	BP	DNA-templated transcription, termination	10	0.204243	0.499903	GO:0006353
GO:0007254	BP	JNK cascade	48	0.204519	0.500233	GO:0007254
GO:0005251	MF	delayed rectifier potassium channel activity	19	0.20473	0.500253	GO:0005251
GO:0046983	MF	protein dimerization activity	158	0.204809	0.500253	GO:0046983
GO:0045931	BP	positive regulation of mitotic cell cycle	29	0.205256	0.500947	GO:0045931
GO:0001890	BP	placenta development	36	0.205375	0.500947	GO:0001890
GO:0045055	BP	regulated exocytosis	19	0.205686	0.50136	GO:0045055
GO:0042391	BP	regulation of membrane potential	42	0.205916	0.501577	GO:0042391
GO:0043679	CC	axon terminus	44	0.206086	0.501646	GO:0043679
GO:0016601	BP	Rac protein signal transduction	19	0.206303	0.50183	GO:0016601
GO:0060707	BP	trophoblast giant cell differentiation	12	0.206568	0.50213	GO:0060707
GO:0045591	BP	positive regulation of regulatory T cell differentiation	11	0.206797	0.502342	GO:0045591
GO:0006884	BP	cell volume homeostasis	13	0.207335	0.50315	GO:0006884
GO:0097730	CC	non-motile cilium	23	0.207429	0.50315	GO:0097730
GO:0055119	BP	relaxation of cardiac muscle	12	0.207656	0.50315	GO:0055119
GO:0010001	BP	glial cell differentiation	13	0.207696	0.50315	GO:0010001
GO:0010508	BP	positive regulation of autophagy	45	0.208003	0.503261	GO:0010508
GO:0060997	BP	dendritic spine morphogenesis	17	0.208026	0.503261	GO:0060997
GO:0007223	BP	Wnt signaling pathway, calcium modulating pathway	37	0.208581	0.503954	GO:0007223
GO:0048037	MF	cofactor binding	18	0.208596	0.503954	GO:0048037
GO:0042127	BP	regulation of cell proliferation	112	0.209136	0.504915	GO:0042127
GO:0030897	CC	HOPS complex	13	0.209984	0.506618	GO:0030897
GO:0033572	BP	transferrin transport	36	0.210919	0.508526	GO:0033572
GO:0071277	BP	cellular response to calcium ion	63	0.21108	0.50857	GO:0071277
GO:0043951	BP	negative regulation of cAMP-mediated signaling	13	0.211277	0.508699	GO:0043951
GO:0035066	BP	positive regulation of histone acetylation	16	0.211525	0.508941	GO:0035066
GO:0033120	BP	positive regulation of RNA splicing	13	0.211777	0.508941	GO:0033120
GO:1990023	CC	mitotic spindle midzone	11	0.211809	0.508941	GO:1990023
GO:0061621	BP	canonical glycolysis	27	0.212025	0.508941	GO:0061621
GO:0040018	BP	positive regulation of multicellular organism growth	32	0.212166	0.508941	GO:0040018
GO:0030914	CC	STAGA complex	12	0.212478	0.508941	GO:0030914
GO:0030539	BP	male genitalia development	19	0.212488	0.508941	GO:0030539
GO:0099149	BP	regulation of postsynaptic neurotransmitter receptor internalization	11	0.212604	0.508941	GO:0099149
GO:0007266	BP	Rho protein signal transduction	41	0.212668	0.508941	GO:0007266
GO:1903204	BP	negative regulation of oxidative stress-induced neuron death	13	0.212869	0.509077	GO:1903204
GO:0032870	BP	cellular response to hormone stimulus	23	0.213182	0.509485	GO:0032870
GO:0014912	BP	negative regulation of smooth muscle cell migration	13	0.213371	0.509593	GO:0014912
GO:0008409	MF	5'-3' exonuclease activity	11	0.213707	0.509899	GO:0008409
GO:0061337	BP	cardiac conduction	45	0.213882	0.509899	GO:0061337
GO:0060317	BP	cardiac epithelial to mesenchymal transition	13	0.213984	0.509899	GO:0060317
GO:0090399	BP	replicative senescence	13	0.214074	0.509899	GO:0090399
GO:2001241	BP	positive regulation of extrinsic apoptotic signaling pathway in absence of ligand	11	0.214793	0.510986	GO:2001241
GO:0022625	CC	cytosolic large ribosomal subunit	52	0.214819	0.510986	GO:0022625
GO:0031293	BP	membrane protein intracellular domain proteolysis	17	0.215184	0.511514	GO:0031293
GO:0031396	BP	regulation of protein ubiquitination	16	0.215341	0.511543	GO:0031396
GO:0045652	BP	regulation of megakaryocyte differentiation	70	0.215811	0.512317	GO:0045652
GO:0050771	BP	negative regulation of axonogenesis	21	0.216423	0.513256	GO:0050771
GO:0035722	BP	interleukin-12-mediated signaling pathway	47	0.216496	0.513256	GO:0035722
GO:0019789	MF	SUMO transferase activity	15	0.216655	0.51329	GO:0019789
GO:0043117	BP	positive regulation of vascular permeability	11	0.216885	0.513491	GO:0043117
GO:0007162	BP	negative regulation of cell adhesion	43	0.217264	0.514047	GO:0007162
GO:0042405	CC	nuclear inclusion body	12	0.217478	0.514085	GO:0042405
GO:0050435	BP	amyloid-beta metabolic process	11	0.21757	0.514085	GO:0050435
GO:0007193	BP	adenylate cyclase-inhibiting G protein-coupled receptor signaling pathway	56	0.217847	0.514291	GO:0007193
GO:0050678	BP	regulation of epithelial cell proliferation	13	0.21815	0.514291	GO:0050678
GO:0032781	BP	positive regulation of ATPase activity	39	0.218286	0.514291	GO:0032781
GO:0060411	BP	cardiac septum morphogenesis	13	0.218407	0.514291	GO:0060411
GO:0007398	BP	ectoderm development	13	0.218599	0.514291	GO:0007398
GO:0055093	BP	response to hyperoxia	14	0.218653	0.514291	GO:0055093
GO:0071897	BP	DNA biosynthetic process	27	0.218672	0.514291	GO:0071897
GO:0042326	BP	negative regulation of phosphorylation	16	0.218956	0.514619	GO:0042326
GO:0007010	BP	cytoskeleton organization	132	0.219235	0.514895	GO:0007010
GO:0034383	BP	low-density lipoprotein particle clearance	24	0.219364	0.514895	GO:0034383
GO:0022409	BP	positive regulation of cell-cell adhesion	12	0.219552	0.514996	GO:0022409
GO:0070971	CC	endoplasmic reticulum exit site	16	0.219893	0.515457	GO:0070971
GO:0000902	BP	cell morphogenesis	52	0.220316	0.516106	GO:0000902
GO:0051168	BP	nuclear export	12	0.220637	0.516519	GO:0051168
GO:0043123	BP	positive regulation of I-kappaB kinase/NF-kappaB signaling	168	0.220801	0.51656	GO:0043123
GO:2001237	BP	negative regulation of extrinsic apoptotic signaling pathway	35	0.221139	0.517012	GO:2001237
GO:1904886	BP	beta-catenin destruction complex disassembly	21	0.221537	0.517599	GO:1904886
GO:0000245	BP	spliceosomal complex assembly	23	0.221922	0.518106	GO:0000245
GO:0080182	BP	histone H3-K4 trimethylation	14	0.222048	0.518106	GO:0080182
GO:0042276	BP	error-prone translesion synthesis	18	0.222191	0.518106	GO:0042276
GO:0043015	MF	gamma-tubulin binding	22	0.222787	0.519153	GO:0043015
GO:0010592	BP	positive regulation of lamellipodium assembly	20	0.223209	0.519795	GO:0010592
GO:0051895	BP	negative regulation of focal adhesion assembly	18	0.223497	0.520126	GO:0051895
GO:0043621	MF	protein self-association	56	0.223954	0.520688	GO:0043621
GO:0008406	BP	gonad development	11	0.224032	0.520688	GO:0008406
GO:0048026	BP	positive regulation of mRNA splicing, via spliceosome	18	0.224644	0.521769	GO:0048026
GO:2000637	BP	positive regulation of gene silencing by miRNA	11	0.225248	0.52274	GO:2000637
GO:0071168	BP	protein localization to chromatin	13	0.225565	0.52274	GO:0071168
GO:0042220	BP	response to cocaine	33	0.225565	0.52274	GO:0042220
GO:0060828	BP	regulation of canonical Wnt signaling pathway	24	0.225666	0.52274	GO:0060828
GO:0009968	BP	negative regulation of signal transduction	39	0.225799	0.52274	GO:0009968
GO:0014075	BP	response to amine	11	0.226054	0.522989	GO:0014075
GO:0030501	BP	positive regulation of bone mineralization	38	0.226505	0.52337	GO:0030501
GO:0045446	BP	endothelial cell differentiation	11	0.226513	0.52337	GO:0045446
GO:0017056	MF	structural constituent of nuclear pore	14	0.226793	0.523543	GO:0017056
GO:0061462	BP	protein localization to lysosome	10	0.226961	0.523543	GO:0061462
GO:0032418	BP	lysosome localization	24	0.227031	0.523543	GO:0032418
GO:0072425	BP	signal transduction involved in G2 DNA damage checkpoint	11	0.227256	0.523723	GO:0072425
GO:0046034	BP	ATP metabolic process	33	0.227636	0.524197	GO:0046034
GO:0048487	MF	beta-tubulin binding	38	0.227758	0.524197	GO:0048487
GO:0042641	CC	actomyosin	13	0.22828	0.524664	GO:0042641
GO:0030512	BP	negative regulation of transforming growth factor beta receptor signaling pathway	74	0.228421	0.524664	GO:0030512
GO:0070198	BP	protein localization to chromosome, telomeric region	10	0.228424	0.524664	GO:0070198
GO:0006809	BP	nitric oxide biosynthetic process	13	0.228552	0.524664	GO:0006809
GO:0001568	BP	blood vessel development	36	0.228853	0.52471	GO:0001568
GO:0032438	BP	melanosome organization	18	0.228868	0.52471	GO:0032438
GO:0071732	BP	cellular response to nitric oxide	16	0.229024	0.52473	GO:0071732
GO:0007492	BP	endoderm development	21	0.229318	0.524815	GO:0007492
GO:0048662	BP	negative regulation of smooth muscle cell proliferation	30	0.229357	0.524815	GO:0048662
GO:0007616	BP	long-term memory	33	0.229943	0.525689	GO:0007616
GO:0042359	BP	vitamin D metabolic process	12	0.230035	0.525689	GO:0042359
GO:0002088	BP	lens development in camera-type eye	32	0.230288	0.525929	GO:0002088
GO:0098869	BP	cellular oxidant detoxification	78	0.230514	0.526106	GO:0098869
GO:0009749	BP	response to glucose	67	0.231208	0.527156	GO:0009749
GO:0035327	CC	transcriptionally active chromatin	22	0.231271	0.527156	GO:0035327
GO:0000815	CC	ESCRT III complex	10	0.231954	0.528059	GO:0000815
GO:0008237	MF	metallopeptidase activity	61	0.232014	0.528059	GO:0008237
GO:0090161	BP	Golgi ribbon formation	12	0.232114	0.528059	GO:0090161
GO:0003743	MF	translation initiation factor activity	41	0.232352	0.528217	GO:0003743
GO:0016254	BP	preassembly of GPI anchor in ER membrane	17	0.232481	0.528217	GO:0016254
GO:0030206	BP	chondroitin sulfate biosynthetic process	26	0.232639	0.528237	GO:0030206
GO:0030681	CC	multimeric ribonuclease P complex	10	0.233193	0.528534	GO:0030681
GO:0033204	MF	ribonuclease P RNA binding	10	0.233193	0.528534	GO:0033204
GO:0008589	BP	regulation of smoothened signaling pathway	22	0.233216	0.528534	GO:0008589
GO:0017049	MF	GTP-Rho binding	12	0.23446	0.530561	GO:0017049
GO:0060413	BP	atrial septum morphogenesis	13	0.234624	0.530561	GO:0060413
GO:0004693	MF	cyclin-dependent protein serine/threonine kinase activity	14	0.234648	0.530561	GO:0004693
GO:0000731	BP	DNA synthesis involved in DNA repair	10	0.234709	0.530561	GO:0000731
GO:0070932	BP	histone H3 deacetylation	17	0.234905	0.530667	GO:0070932
GO:0006476	BP	protein deacetylation	11	0.235226	0.531053	GO:0006476
GO:0035257	MF	nuclear hormone receptor binding	23	0.235512	0.531362	GO:0035257
GO:0000400	MF	four-way junction DNA binding	16	0.236139	0.532086	GO:0000400
GO:0009267	BP	cellular response to starvation	62	0.236251	0.532086	GO:0009267
GO:0090201	BP	negative regulation of release of cytochrome c from mitochondria	19	0.236283	0.532086	GO:0090201
GO:0009887	BP	animal organ morphogenesis	78	0.236621	0.532223	GO:0009887
GO:0008135	MF	translation factor activity, RNA binding	20	0.236791	0.532223	GO:0008135
GO:0019843	MF	rRNA binding	27	0.236874	0.532223	GO:0019843
GO:0046415	BP	urate metabolic process	10	0.236943	0.532223	GO:0046415
GO:0071257	BP	cellular response to electrical stimulus	12	0.237309	0.532617	GO:0071257
GO:0010801	BP	negative regulation of peptidyl-threonine phosphorylation	20	0.237419	0.532617	GO:0010801
GO:0060236	BP	regulation of mitotic spindle organization	17	0.237939	0.532806	GO:0060236
GO:0043507	BP	positive regulation of JUN kinase activity	36	0.238006	0.532806	GO:0043507
GO:0046325	BP	negative regulation of glucose import	16	0.238138	0.532806	GO:0046325
GO:0032981	BP	mitochondrial respiratory chain complex I assembly	64	0.238209	0.532806	GO:0032981
GO:0006471	BP	protein ADP-ribosylation	16	0.238254	0.532806	GO:0006471
GO:0016706	MF	oxidoreductase activity, acting on paired donors, with incorporation or reduction of molecular oxygen, 2-oxoglutarate as one donor, and incorporation of one atom each of oxygen into both donors	13	0.238623	0.533296	GO:0016706
GO:0001893	BP	maternal placenta development	11	0.239018	0.533554	GO:0001893
GO:0005521	MF	lamin binding	13	0.23904	0.533554	GO:0005521
GO:0007584	BP	response to nutrient	61	0.239466	0.533976	GO:0007584
GO:0016529	CC	sarcoplasmic reticulum	38	0.239529	0.533976	GO:0016529
GO:0046856	BP	phosphatidylinositol dephosphorylation	19	0.239775	0.534041	GO:0046856
GO:0032570	BP	response to progesterone	42	0.239859	0.534041	GO:0032570
GO:0010842	BP	retina layer formation	22	0.240302	0.534692	GO:0010842
GO:0030971	MF	receptor tyrosine kinase binding	48	0.240461	0.534709	GO:0030971
GO:0098609	BP	cell-cell adhesion	101	0.240836	0.534809	GO:0098609
GO:0001750	CC	photoreceptor outer segment	48	0.241204	0.534809	GO:0001750
GO:0043085	BP	positive regulation of catalytic activity	75	0.241308	0.534809	GO:0043085
GO:0005675	CC	transcription factor TFIIH holo complex	10	0.241376	0.534809	GO:0005675
GO:0097194	BP	execution phase of apoptosis	17	0.241488	0.534809	GO:0097194
GO:0010575	BP	positive regulation of vascular endothelial growth factor production	29	0.241587	0.534809	GO:0010575
GO:1900181	BP	negative regulation of protein localization to nucleus	17	0.24169	0.534809	GO:1900181
GO:0008235	MF	metalloexopeptidase activity	12	0.24186	0.534809	GO:0008235
GO:0004602	MF	glutathione peroxidase activity	16	0.242074	0.534809	GO:0004602
GO:0030282	BP	bone mineralization	43	0.242084	0.534809	GO:0030282
GO:0060314	BP	regulation of ryanodine-sensitive calcium-release channel activity	15	0.242164	0.534809	GO:0060314
GO:0006554	BP	lysine catabolic process	12	0.242484	0.534985	GO:0006554
GO:0005184	MF	neuropeptide hormone activity	20	0.242545	0.534985	GO:0005184
GO:0005245	MF	voltage-gated calcium channel activity	30	0.242707	0.535011	GO:0005245
GO:0007017	BP	microtubule-based process	15	0.243261	0.535635	GO:0007017
GO:0042277	MF	peptide binding	26	0.243292	0.535635	GO:0042277
GO:0045176	BP	apical protein localization	11	0.243557	0.535885	GO:0045176
GO:0097320	BP	plasma membrane tubulation	12	0.244271	0.537099	GO:0097320
GO:0004402	MF	histone acetyltransferase activity	38	0.24442	0.537099	GO:0004402
GO:0045597	BP	positive regulation of cell differentiation	33	0.244649	0.537099	GO:0045597
GO:0098962	BP	regulation of postsynaptic neurotransmitter receptor activity	12	0.244714	0.537099	GO:0098962
GO:0006259	BP	DNA metabolic process	23	0.245075	0.53756	GO:0006259
GO:0008093	MF	cytoskeletal adaptor activity	13	0.245261	0.537636	GO:0008093
GO:0005160	MF	transforming growth factor beta receptor binding	11	0.245499	0.537674	GO:0005160
GO:0048172	BP	regulation of short-term neuronal synaptic plasticity	11	0.245822	0.537674	GO:0048172
GO:0004709	MF	MAP kinase kinase kinase activity	16	0.245843	0.537674	GO:0004709
GO:0019068	BP	virion assembly	11	0.245965	0.537674	GO:0019068
GO:0060170	CC	ciliary membrane	52	0.246036	0.537674	GO:0060170
GO:0046627	BP	negative regulation of insulin receptor signaling pathway	29	0.246622	0.538312	GO:0046627
GO:0033558	MF	protein deacetylase activity	11	0.24678	0.538312	GO:0033558
GO:0032332	BP	positive regulation of chondrocyte differentiation	19	0.246783	0.538312	GO:0032332
GO:0043276	BP	anoikis	11	0.247049	0.53856	GO:0043276
GO:0043240	CC	Fanconi anaemia nuclear complex	13	0.247873	0.539538	GO:0043240
GO:0030534	BP	adult behavior	31	0.247892	0.539538	GO:0030534
GO:0016580	CC	Sin3 complex	12	0.247953	0.539538	GO:0016580
GO:0050919	BP	negative chemotaxis	16	0.248512	0.540209	GO:0050919
GO:0001047	MF	core promoter binding	11	0.248566	0.540209	GO:0001047
GO:0030866	BP	cortical actin cytoskeleton organization	23	0.248861	0.540288	GO:0030866
GO:0061564	BP	axon development	13	0.248907	0.540288	GO:0061564
GO:0005227	MF	calcium activated cation channel activity	12	0.249215	0.540626	GO:0005227
GO:0051481	BP	negative regulation of cytosolic calcium ion concentration	12	0.249475	0.540858	GO:0051481
GO:0060009	BP	Sertoli cell development	10	0.249774	0.541178	GO:0060009
GO:0051010	MF	microtubule plus-end binding	13	0.250214	0.541799	GO:0051010
GO:1990573	BP	potassium ion import across plasma membrane	17	0.250485	0.542057	GO:1990573
GO:0060674	BP	placenta blood vessel development	11	0.251164	0.542973	GO:0060674
GO:0007077	BP	mitotic nuclear envelope disassembly	12	0.251439	0.542973	GO:0007077
GO:0045945	BP	positive regulation of transcription by RNA polymerase III	10	0.251511	0.542973	GO:0045945
GO:0007015	BP	actin filament organization	58	0.251641	0.542973	GO:0007015
GO:0005385	MF	zinc ion transmembrane transporter activity	11	0.251694	0.542973	GO:0005385
GO:0035987	BP	endodermal cell differentiation	28	0.251827	0.542973	GO:0035987
GO:1902430	BP	negative regulation of amyloid-beta formation	12	0.252129	0.543294	GO:1902430
GO:0019233	BP	sensory perception of pain	53	0.252736	0.544091	GO:0019233
GO:0060253	BP	negative regulation of glial cell proliferation	10	0.252823	0.544091	GO:0060253
GO:0001671	MF	ATPase activator activity	21	0.252959	0.544091	GO:0001671
GO:0035725	BP	sodium ion transmembrane transport	58	0.253486	0.544713	GO:0035725
GO:0042711	BP	maternal behavior	11	0.253677	0.544713	GO:0042711
GO:2001022	BP	positive regulation of response to DNA damage stimulus	10	0.253708	0.544713	GO:2001022
GO:0030141	CC	secretory granule	60	0.25454	0.545883	GO:0030141
GO:0034063	BP	stress granule assembly	15	0.254561	0.545883	GO:0034063
GO:2000781	BP	positive regulation of double-strand break repair	12	0.255316	0.546249	GO:2000781
GO:0044849	BP	estrous cycle	16	0.255323	0.546249	GO:0044849
GO:0022857	MF	transmembrane transporter activity	51	0.255351	0.546249	GO:0022857
GO:0032688	BP	negative regulation of interferon-beta production	12	0.255447	0.546249	GO:0032688
GO:0031954	BP	positive regulation of protein autophosphorylation	21	0.255501	0.546249	GO:0031954
GO:0009100	BP	glycoprotein metabolic process	10	0.255781	0.546518	GO:0009100
GO:0003323	BP	type B pancreatic cell development	12	0.256249	0.546533	GO:0003323
GO:0060076	CC	excitatory synapse	27	0.256273	0.546533	GO:0060076
GO:0009743	BP	response to carbohydrate	11	0.256466	0.546533	GO:0009743
GO:0034356	BP	NAD biosynthesis via nicotinamide riboside salvage pathway	15	0.256654	0.546533	GO:0034356
GO:0005790	CC	smooth endoplasmic reticulum	24	0.256699	0.546533	GO:0005790
GO:0016234	CC	inclusion body	19	0.256712	0.546533	GO:0016234
GO:0008652	BP	cellular amino acid biosynthetic process	25	0.257363	0.547591	GO:0008652
GO:0003341	BP	cilium movement	26	0.257686	0.547698	GO:0003341
GO:0032868	BP	response to insulin	62	0.25782	0.547698	GO:0032868
GO:0070034	MF	telomerase RNA binding	21	0.257958	0.547698	GO:0070034
GO:0007084	BP	mitotic nuclear envelope reassembly	10	0.258166	0.547698	GO:0007084
GO:0000176	CC	nuclear exosome (RNase complex)	10	0.258185	0.547698	GO:0000176
GO:0017166	MF	vinculin binding	11	0.258692	0.548322	GO:0017166
GO:0000346	CC	transcription export complex	13	0.258788	0.548322	GO:0000346
GO:0043410	BP	positive regulation of MAPK cascade	95	0.259342	0.549168	GO:0043410
GO:0003746	MF	translation elongation factor activity	12	0.259844	0.549902	GO:0003746
GO:0007528	BP	neuromuscular junction development	20	0.260031	0.54997	GO:0007528
GO:0004143	MF	diacylglycerol kinase activity	11	0.260675	0.551003	GO:0004143
GO:0030316	BP	osteoclast differentiation	30	0.261408	0.551998	GO:0030316
GO:0009312	BP	oligosaccharide biosynthetic process	11	0.261456	0.551998	GO:0009312
GO:0030163	BP	protein catabolic process	26	0.261828	0.552247	GO:0030163
GO:0010875	BP	positive regulation of cholesterol efflux	16	0.261886	0.552247	GO:0010875
GO:0070166	BP	enamel mineralization	11	0.262091	0.552249	GO:0070166
GO:0005041	MF	low-density lipoprotein particle receptor activity	12	0.262198	0.552249	GO:0005041
GO:0050852	BP	T cell receptor signaling pathway	152	0.262566	0.552306	GO:0050852
GO:0006336	BP	DNA replication-independent nucleosome assembly	26	0.262731	0.552306	GO:0006336
GO:0018345	BP	protein palmitoylation	24	0.262787	0.552306	GO:0018345
GO:0048240	BP	sperm capacitation	18	0.262847	0.552306	GO:0048240
GO:0033630	BP	positive regulation of cell adhesion mediated by integrin	14	0.263022	0.552346	GO:0033630
GO:0006983	BP	ER overload response	11	0.263236	0.552468	GO:0006983
GO:0014070	BP	response to organic cyclic compound	46	0.263675	0.553064	GO:0014070
GO:0051592	BP	response to calcium ion	56	0.264048	0.553519	GO:0051592
GO:0070106	BP	interleukin-27-mediated signaling pathway	11	0.26423	0.553573	GO:0070106
GO:1902902	BP	negative regulation of autophagosome assembly	13	0.26451	0.553831	GO:1902902
GO:0070986	BP	left/right axis specification	12	0.264702	0.553908	GO:0070986
GO:0042982	BP	amyloid precursor protein metabolic process	11	0.265663	0.55559	GO:0042982
GO:0015035	MF	protein disulfide oxidoreductase activity	20	0.266037	0.556045	GO:0015035
GO:0048675	BP	axon extension	23	0.266477	0.556637	GO:0048675
GO:0045821	BP	positive regulation of glycolytic process	20	0.266811	0.557007	GO:0045821
GO:0061099	BP	negative regulation of protein tyrosine kinase activity	12	0.267176	0.557015	GO:0061099
GO:0018242	BP	protein O-linked glycosylation via serine	10	0.267905	0.557015	GO:0018242
GO:0070757	BP	interleukin-35-mediated signaling pathway	11	0.267906	0.557015	GO:0070757
GO:0008289	MF	lipid binding	125	0.267929	0.557015	GO:0008289
GO:0016311	BP	dephosphorylation	82	0.267965	0.557015	GO:0016311
GO:0048009	BP	insulin-like growth factor receptor signaling pathway	13	0.268155	0.557015	GO:0048009
GO:0048872	BP	homeostasis of number of cells	15	0.268302	0.557015	GO:0048872
GO:0071782	CC	endoplasmic reticulum tubular network	12	0.268348	0.557015	GO:0071782
GO:0006310	BP	DNA recombination	61	0.268652	0.557015	GO:0006310
GO:0040015	BP	negative regulation of multicellular organism growth	11	0.268914	0.557015	GO:0040015
GO:0000185	BP	activation of MAPKKK activity	11	0.26915	0.557015	GO:0000185
GO:0070584	BP	mitochondrion morphogenesis	20	0.269297	0.557015	GO:0070584
GO:0070373	BP	negative regulation of ERK1 and ERK2 cascade	74	0.269353	0.557015	GO:0070373
GO:0006930	BP	substrate-dependent cell migration, cell extension	10	0.269408	0.557015	GO:0006930
GO:0030030	BP	cell projection organization	35	0.269509	0.557015	GO:0030030
GO:0032924	BP	activin receptor signaling pathway	16	0.269785	0.557015	GO:0032924
GO:0043491	BP	protein kinase B signaling	39	0.269889	0.557015	GO:0043491
GO:0071407	BP	cellular response to organic cyclic compound	46	0.269946	0.557015	GO:0071407
GO:0018146	BP	keratan sulfate biosynthetic process	28	0.270384	0.557015	GO:0018146
GO:0033130	MF	acetylcholine receptor binding	10	0.270594	0.557015	GO:0033130
GO:0099055	CC	integral component of postsynaptic membrane	46	0.270672	0.557015	GO:0099055
GO:0060122	BP	inner ear receptor cell stereocilium organization	16	0.270903	0.557015	GO:0060122
GO:0031012	CC	extracellular matrix	108	0.270924	0.557015	GO:0031012
GO:0050750	MF	low-density lipoprotein particle receptor binding	21	0.270956	0.557015	GO:0050750
GO:0048027	MF	mRNA 5'-UTR binding	23	0.271217	0.557015	GO:0048027
GO:0051568	BP	histone H3-K4 methylation	19	0.271238	0.557015	GO:0051568
GO:0018095	BP	protein polyglutamylation	11	0.271283	0.557015	GO:0018095
GO:0050884	BP	neuromuscular process controlling posture	11	0.271351	0.557015	GO:0050884
GO:0000002	BP	mitochondrial genome maintenance	11	0.271366	0.557015	GO:0000002
GO:0008306	BP	associative learning	27	0.271676	0.557328	GO:0008306
GO:0021670	BP	lateral ventricle development	11	0.272368	0.558179	GO:0021670
GO:0014065	BP	phosphatidylinositol 3-kinase signaling	28	0.272481	0.558179	GO:0014065
GO:0005746	CC	mitochondrial respiratory chain	14	0.272981	0.558179	GO:0005746
GO:0007026	BP	negative regulation of microtubule depolymerization	21	0.273045	0.558179	GO:0007026
GO:0006672	BP	ceramide metabolic process	19	0.273099	0.558179	GO:0006672
GO:0046135	BP	pyrimidine nucleoside catabolic process	11	0.273219	0.558179	GO:0046135
GO:0045824	BP	negative regulation of innate immune response	16	0.273336	0.558179	GO:0045824
GO:0001881	BP	receptor recycling	10	0.273497	0.558179	GO:0001881
GO:0030295	MF	protein kinase activator activity	21	0.273506	0.558179	GO:0030295
GO:0009880	BP	embryonic pattern specification	19	0.273912	0.558672	GO:0009880
GO:0009948	BP	anterior/posterior axis specification	14	0.274062	0.558672	GO:0009948
GO:0035914	BP	skeletal muscle cell differentiation	39	0.274627	0.559051	GO:0035914
GO:1902230	BP	negative regulation of intrinsic apoptotic signaling pathway in response to DNA damage	15	0.274711	0.559051	GO:1902230
GO:0098641	MF	cadherin binding involved in cell-cell adhesion	17	0.274825	0.559051	GO:0098641
GO:0006625	BP	protein targeting to peroxisome	65	0.275048	0.559051	GO:0006625
GO:0048365	MF	Rac GTPase binding	38	0.275336	0.559051	GO:0048365
GO:0005249	MF	voltage-gated potassium channel activity	31	0.275353	0.559051	GO:0005249
GO:0006829	BP	zinc ion transport	10	0.275605	0.559051	GO:0006829
GO:0032743	BP	positive regulation of interleukin-2 production	14	0.275607	0.559051	GO:0032743
GO:0004177	MF	aminopeptidase activity	26	0.275666	0.559051	GO:0004177
GO:0005513	BP	detection of calcium ion	12	0.275869	0.559142	GO:0005513
GO:0004180	MF	carboxypeptidase activity	14	0.276301	0.559511	GO:0004180
GO:0002064	BP	epithelial cell development	12	0.276705	0.559511	GO:0002064
GO:0019992	MF	diacylglycerol binding	12	0.276731	0.559511	GO:0019992
GO:0006349	BP	regulation of gene expression by genetic imprinting	15	0.27679	0.559511	GO:0006349
GO:0008209	BP	androgen metabolic process	15	0.277256	0.559511	GO:0008209
GO:0043388	BP	positive regulation of DNA binding	30	0.277452	0.559511	GO:0043388
GO:0031362	CC	anchored component of external side of plasma membrane	14	0.27748	0.559511	GO:0031362
GO:0009615	BP	response to virus	103	0.277489	0.559511	GO:0009615
GO:0071005	CC	U2-type precatalytic spliceosome	48	0.277494	0.559511	GO:0071005
GO:1990138	BP	neuron projection extension	19	0.277668	0.559511	GO:1990138
GO:0021819	BP	layer formation in cerebral cortex	12	0.277785	0.559511	GO:0021819
GO:0051291	BP	protein heterooligomerization	64	0.278119	0.559867	GO:0051291
GO:0070911	BP	global genome nucleotide-excision repair	26	0.2784	0.560115	GO:0070911
GO:0072358	BP	cardiovascular system development	10	0.278658	0.560316	GO:0072358
GO:0006814	BP	sodium ion transport	78	0.279085	0.560857	GO:0006814
GO:0009060	BP	aerobic respiration	18	0.279509	0.561392	GO:0009060
GO:0070423	BP	nucleotide-binding oligomerization domain containing signaling pathway	22	0.280003	0.562065	GO:0070423
GO:0004864	MF	protein phosphatase inhibitor activity	27	0.280264	0.56227	GO:0004864
GO:0030238	BP	male sex determination	12	0.28086	0.562875	GO:0030238
GO:0009313	BP	oligosaccharide catabolic process	11	0.280992	0.562875	GO:0009313
GO:0050662	MF	coenzyme binding	10	0.281041	0.562875	GO:0050662
GO:0031307	CC	integral component of mitochondrial outer membrane	17	0.281681	0.563751	GO:0031307
GO:0051000	BP	positive regulation of nitric-oxide synthase activity	22	0.281918	0.563751	GO:0051000
GO:0050860	BP	negative regulation of T cell receptor signaling pathway	19	0.282285	0.563751	GO:0050860
GO:0008157	MF	protein phosphatase 1 binding	16	0.282333	0.563751	GO:0008157
GO:2001028	BP	positive regulation of endothelial cell chemotaxis	10	0.282379	0.563751	GO:2001028
GO:0046902	BP	regulation of mitochondrial membrane permeability	11	0.282431	0.563751	GO:0046902
GO:0019882	BP	antigen processing and presentation	19	0.282872	0.564123	GO:0019882
GO:0046329	BP	negative regulation of JNK cascade	29	0.283097	0.564123	GO:0046329
GO:0008250	CC	oligosaccharyltransferase complex	12	0.283186	0.564123	GO:0008250
GO:0043647	BP	inositol phosphate metabolic process	47	0.283322	0.564123	GO:0043647
GO:0008094	MF	DNA-dependent ATPase activity	30	0.283413	0.564123	GO:0008094
GO:1901379	BP	regulation of potassium ion transmembrane transport	16	0.284358	0.564772	GO:1901379
GO:0010906	BP	regulation of glucose metabolic process	25	0.284392	0.564772	GO:0010906
GO:0005687	CC	U4 snRNP	11	0.284478	0.564772	GO:0005687
GO:0046622	BP	positive regulation of organ growth	11	0.284513	0.564772	GO:0046622
GO:0042805	MF	actinin binding	10	0.284534	0.564772	GO:0042805
GO:0048514	BP	blood vessel morphogenesis	17	0.285261	0.565897	GO:0048514
GO:0016322	BP	neuron remodeling	11	0.285572	0.566199	GO:0016322
GO:0001935	BP	endothelial cell proliferation	15	0.285788	0.566309	GO:0001935
GO:0034080	BP	CENP-A containing nucleosome assembly	42	0.286152	0.566716	GO:0034080
GO:0003899	MF	DNA-directed 5'-3' RNA polymerase activity	17	0.286737	0.567558	GO:0003899
GO:0030122	CC	AP-2 adaptor complex	11	0.286936	0.567635	GO:0030122
GO:0045672	BP	positive regulation of osteoclast differentiation	22	0.287455	0.568344	GO:0045672
GO:0002102	CC	podosome	28	0.288168	0.569343	GO:0002102
GO:0090557	BP	establishment of endothelial intestinal barrier	10	0.288466	0.569343	GO:0090557
GO:0006414	BP	translational elongation	13	0.288932	0.569343	GO:0006414
GO:0006636	BP	unsaturated fatty acid biosynthetic process	15	0.288978	0.569343	GO:0006636
GO:0044319	BP	wound healing, spreading of cells	14	0.289073	0.569343	GO:0044319
GO:0006851	BP	mitochondrial calcium ion transmembrane transport	23	0.289092	0.569343	GO:0006851
GO:0003785	MF	actin monomer binding	23	0.289263	0.569343	GO:0003785
GO:0021854	BP	hypothalamus development	12	0.289311	0.569343	GO:0021854
GO:0006469	BP	negative regulation of protein kinase activity	71	0.289404	0.569343	GO:0006469
GO:0031333	BP	negative regulation of protein complex assembly	19	0.289921	0.569961	GO:0031333
GO:0004860	MF	protein kinase inhibitor activity	27	0.290039	0.569961	GO:0004860
GO:0005614	CC	interstitial matrix	11	0.290294	0.570145	GO:0005614
GO:0090200	BP	positive regulation of release of cytochrome c from mitochondria	28	0.290499	0.570232	GO:0090200
GO:0043434	BP	response to peptide hormone	36	0.290696	0.570305	GO:0043434
GO:0007259	BP	JAK-STAT cascade	28	0.290927	0.570442	GO:0007259
GO:0005875	CC	microtubule associated complex	28	0.291893	0.572019	GO:0005875
GO:0006536	BP	glutamate metabolic process	14	0.292486	0.572552	GO:0006536
GO:0002218	BP	activation of innate immune response	24	0.292563	0.572552	GO:0002218
GO:0071470	BP	cellular response to osmotic stress	10	0.292648	0.572552	GO:0071470
GO:0061136	BP	regulation of proteasomal protein catabolic process	16	0.293397	0.572765	GO:0061136
GO:0003727	MF	single-stranded RNA binding	36	0.293402	0.572765	GO:0003727
GO:0015485	MF	cholesterol binding	42	0.293529	0.572765	GO:0015485
GO:0000030	MF	mannosyltransferase activity	13	0.293814	0.572765	GO:0000030
GO:0071949	MF	FAD binding	25	0.293944	0.572765	GO:0071949
GO:0045667	BP	regulation of osteoblast differentiation	11	0.293945	0.572765	GO:0045667
GO:0045947	BP	negative regulation of translational initiation	13	0.294146	0.572765	GO:0045947
GO:0051965	BP	positive regulation of synapse assembly	61	0.294159	0.572765	GO:0051965
GO:0043586	BP	tongue development	11	0.294346	0.572765	GO:0043586
GO:0016409	MF	palmitoyltransferase activity	18	0.294371	0.572765	GO:0016409
GO:0043083	CC	synaptic cleft	11	0.295103	0.573366	GO:0043083
GO:0048266	BP	behavioral response to pain	11	0.295155	0.573366	GO:0048266
GO:1903364	BP	positive regulation of cellular protein catabolic process	13	0.295164	0.573366	GO:1903364
GO:0044183	MF	protein binding involved in protein folding	14	0.295389	0.573442	GO:0044183
GO:0033344	BP	cholesterol efflux	22	0.295527	0.573442	GO:0033344
GO:0071375	BP	cellular response to peptide hormone stimulus	16	0.296432	0.574472	GO:0071375
GO:0046039	BP	GTP metabolic process	14	0.296928	0.574472	GO:0046039
GO:0043030	BP	regulation of macrophage activation	10	0.297021	0.574472	GO:0043030
GO:0031593	MF	polyubiquitin modification-dependent protein binding	23	0.297115	0.574472	GO:0031593
GO:0031100	BP	animal organ regeneration	43	0.297192	0.574472	GO:0031100
GO:0045907	BP	positive regulation of vasoconstriction	24	0.297738	0.574472	GO:0045907
GO:0071372	BP	cellular response to follicle-stimulating hormone stimulus	11	0.297938	0.574472	GO:0071372
GO:0006826	BP	iron ion transport	16	0.298162	0.574472	GO:0006826
GO:0007339	BP	binding of sperm to zona pellucida	33	0.298192	0.574472	GO:0007339
GO:0097431	CC	mitotic spindle pole	26	0.298209	0.574472	GO:0097431
GO:0032467	BP	positive regulation of cytokinesis	36	0.29843	0.574472	GO:0032467
GO:0031435	MF	mitogen-activated protein kinase kinase kinase binding	17	0.298532	0.574472	GO:0031435
GO:0007257	BP	activation of JUN kinase activity	35	0.298614	0.574472	GO:0007257
GO:2000786	BP	positive regulation of autophagosome assembly	11	0.29863	0.574472	GO:2000786
GO:0002063	BP	chondrocyte development	17	0.298702	0.574472	GO:0002063
GO:0051013	BP	microtubule severing	11	0.298805	0.574472	GO:0051013
GO:0005902	CC	microvillus	59	0.29881	0.574472	GO:0005902
GO:0060445	BP	branching involved in salivary gland morphogenesis	11	0.299388	0.575271	GO:0060445
GO:0030514	BP	negative regulation of BMP signaling pathway	44	0.299627	0.57542	GO:0030514
GO:0033235	BP	positive regulation of protein sumoylation	10	0.300331	0.576094	GO:0033235
GO:2000060	BP	positive regulation of ubiquitin-dependent protein catabolic process	15	0.30039	0.576094	GO:2000060
GO:0030532	CC	small nuclear ribonucleoprotein complex	14	0.300562	0.576094	GO:0030532
GO:0007405	BP	neuroblast proliferation	16	0.300627	0.576094	GO:0007405
GO:0004540	MF	ribonuclease activity	13	0.300908	0.576321	GO:0004540
GO:0009116	BP	nucleoside metabolic process	12	0.301238	0.576641	GO:0009116
GO:0042311	BP	vasodilation	19	0.30145	0.576737	GO:0042311
GO:0046427	BP	positive regulation of JAK-STAT cascade	24	0.302069	0.577282	GO:0046427
GO:0003950	MF	NAD+ ADP-ribosyltransferase activity	15	0.302178	0.577282	GO:0003950
GO:0051247	BP	positive regulation of protein metabolic process	10	0.302249	0.577282	GO:0051247
GO:0006261	BP	DNA-dependent DNA replication	10	0.302386	0.577282	GO:0006261
GO:0048185	MF	activin binding	11	0.302625	0.577428	GO:0048185
GO:0060348	BP	bone development	42	0.302839	0.577526	GO:0060348
GO:0035457	BP	cellular response to interferon-alpha	11	0.303221	0.577944	GO:0035457
GO:1990825	MF	sequence-specific mRNA binding	12	0.303659	0.578468	GO:1990825
GO:0006094	BP	gluconeogenesis	43	0.304656	0.580055	GO:0006094
GO:0051146	BP	striated muscle cell differentiation	11	0.304821	0.580058	GO:0051146
GO:0097352	BP	autophagosome maturation	23	0.305239	0.580544	GO:0097352
GO:0060088	BP	auditory receptor cell stereocilium organization	10	0.305569	0.580859	GO:0060088
GO:0019915	BP	lipid storage	20	0.305906	0.581035	GO:0019915
GO:0001823	BP	mesonephros development	11	0.306052	0.581035	GO:0001823
GO:0006098	BP	pentose-phosphate shunt	13	0.306153	0.581035	GO:0006098
GO:0045840	BP	positive regulation of mitotic nuclear division	28	0.306431	0.581042	GO:0045840
GO:0046513	BP	ceramide biosynthetic process	24	0.306484	0.581042	GO:0046513
GO:0014032	BP	neural crest cell development	20	0.30688	0.581483	GO:0014032
GO:0002087	BP	regulation of respiratory gaseous exchange by neurological system process	13	0.307087	0.581564	GO:0002087
GO:0033574	BP	response to testosterone	31	0.307366	0.581637	GO:0033574
GO:0030041	BP	actin filament polymerization	27	0.307506	0.581637	GO:0030041
GO:0043280	BP	positive regulation of cysteine-type endopeptidase activity involved in apoptotic process	46	0.307617	0.581637	GO:0043280
GO:0006270	BP	DNA replication initiation	25	0.30862	0.582924	GO:0006270
GO:0036002	MF	pre-mRNA binding	15	0.308828	0.582924	GO:0036002
GO:0016594	MF	glycine binding	12	0.308985	0.582924	GO:0016594
GO:0060402	BP	calcium ion transport into cytosol	12	0.309102	0.582924	GO:0060402
GO:0031103	BP	axon regeneration	15	0.309289	0.582924	GO:0031103
GO:0003333	BP	amino acid transmembrane transport	10	0.309454	0.582924	GO:0003333
GO:0031005	MF	filamin binding	11	0.309565	0.582924	GO:0031005
GO:0045088	BP	regulation of innate immune response	17	0.309699	0.582924	GO:0045088
GO:0030864	CC	cortical actin cytoskeleton	34	0.309786	0.582924	GO:0030864
GO:0003180	BP	aortic valve morphogenesis	28	0.30994	0.582924	GO:0003180
GO:0008033	BP	tRNA processing	16	0.310318	0.583326	GO:0008033
GO:0097067	BP	cellular response to thyroid hormone stimulus	13	0.310959	0.584102	GO:0097067
GO:0003376	BP	sphingosine-1-phosphate receptor signaling pathway	10	0.311257	0.584102	GO:0003376
GO:0001540	MF	amyloid-beta binding	71	0.311343	0.584102	GO:0001540
GO:0006103	BP	2-oxoglutarate metabolic process	15	0.311389	0.584102	GO:0006103
GO:0030666	CC	endocytic vesicle membrane	68	0.311656	0.584293	GO:0030666
GO:0006342	BP	chromatin silencing	17	0.311965	0.584565	GO:0006342
GO:2000273	BP	positive regulation of signaling receptor activity	10	0.312779	0.585536	GO:2000273
GO:0004197	MF	cysteine-type endopeptidase activity	43	0.312856	0.585536	GO:0004197
GO:0005719	CC	nuclear euchromatin	24	0.313219	0.585536	GO:0005719
GO:0070886	BP	positive regulation of calcineurin-NFAT signaling cascade	16	0.313297	0.585536	GO:0070886
GO:0005518	MF	collagen binding	59	0.313309	0.585536	GO:0005518
GO:0097284	BP	hepatocyte apoptotic process	11	0.313711	0.585793	GO:0097284
GO:0051321	BP	meiotic cell cycle	50	0.313776	0.585793	GO:0051321
GO:0086002	BP	cardiac muscle cell action potential involved in contraction	16	0.314331	0.586281	GO:0086002
GO:0009636	BP	response to toxic substance	62	0.314368	0.586281	GO:0009636
GO:0045820	BP	negative regulation of glycolytic process	13	0.314758	0.5867	GO:0045820
GO:0016301	MF	kinase activity	67	0.315966	0.588641	GO:0016301
GO:2001224	BP	positive regulation of neuron migration	13	0.316583	0.589146	GO:2001224
GO:1902188	BP	positive regulation of viral release from host cell	10	0.316624	0.589146	GO:1902188
GO:0016829	MF	lyase activity	13	0.316735	0.589146	GO:0016829
GO:0043296	CC	apical junction complex	11	0.317724	0.590677	GO:0043296
GO:0043027	MF	cysteine-type endopeptidase inhibitor activity involved in apoptotic process	19	0.318091	0.59105	GO:0043027
GO:0034719	CC	SMN-Sm protein complex	17	0.318417	0.591182	GO:0034719
GO:0071044	BP	histone mRNA catabolic process	10	0.318656	0.591182	GO:0071044
GO:0071356	BP	cellular response to tumor necrosis factor	106	0.318662	0.591182	GO:0071356
GO:0048747	BP	muscle fiber development	14	0.319471	0.591311	GO:0048747
GO:0090336	BP	positive regulation of brown fat cell differentiation	10	0.31948	0.591311	GO:0090336
GO:0007568	BP	aging	169	0.319548	0.591311	GO:0007568
GO:0017080	MF	sodium channel regulator activity	24	0.31968	0.591311	GO:0017080
GO:0099738	CC	cell cortex region	11	0.319691	0.591311	GO:0099738
GO:0045499	MF	chemorepellent activity	10	0.319731	0.591311	GO:0045499
GO:0051216	BP	cartilage development	58	0.320423	0.592281	GO:0051216
GO:0030948	BP	negative regulation of vascular endothelial growth factor receptor signaling pathway	11	0.320646	0.592385	GO:0030948
GO:0007009	BP	plasma membrane organization	15	0.32154	0.593543	GO:0007009
GO:0033689	BP	negative regulation of osteoblast proliferation	15	0.321607	0.593543	GO:0033689
GO:0048012	BP	hepatocyte growth factor receptor signaling pathway	11	0.321826	0.593638	GO:0048012
GO:0097755	BP	positive regulation of blood vessel diameter	19	0.322259	0.594129	GO:0097755
GO:0036513	CC	Derlin-1 retrotranslocation complex	10	0.322837	0.594336	GO:0036513
GO:2000147	BP	positive regulation of cell motility	21	0.322838	0.594336	GO:2000147
GO:0016573	BP	histone acetylation	35	0.322949	0.594336	GO:0016573
GO:0030278	BP	regulation of ossification	11	0.323041	0.594336	GO:0030278
GO:0098911	BP	regulation of ventricular cardiac muscle cell action potential	11	0.324429	0.596306	GO:0098911
GO:0006509	BP	membrane protein ectodomain proteolysis	20	0.324448	0.596306	GO:0006509
GO:0032516	BP	positive regulation of phosphoprotein phosphatase activity	14	0.324737	0.596481	GO:0032516
GO:0051259	BP	protein complex oligomerization	71	0.324879	0.596481	GO:0051259
GO:0050839	MF	cell adhesion molecule binding	49	0.32511	0.596595	GO:0050839
GO:0048407	MF	platelet-derived growth factor binding	11	0.325598	0.597132	GO:0048407
GO:0010762	BP	regulation of fibroblast migration	11	0.325852	0.597132	GO:0010762
GO:0035082	BP	axoneme assembly	15	0.325907	0.597132	GO:0035082
GO:0050431	MF	transforming growth factor beta binding	21	0.326535	0.597592	GO:0050431
GO:0032508	BP	DNA duplex unwinding	44	0.32662	0.597592	GO:0032508
GO:0044030	BP	regulation of DNA methylation	16	0.326761	0.597592	GO:0044030
GO:0060079	BP	excitatory postsynaptic potential	58	0.326832	0.597592	GO:0060079
GO:0030665	CC	clathrin-coated vesicle membrane	53	0.327213	0.597681	GO:0030665
GO:0043473	BP	pigmentation	24	0.327369	0.597681	GO:0043473
GO:0005539	MF	glycosaminoglycan binding	19	0.327386	0.597681	GO:0005539
GO:0051085	BP	chaperone cofactor-dependent protein refolding	13	0.327689	0.597813	GO:0051085
GO:2000310	BP	regulation of NMDA receptor activity	29	0.327795	0.597813	GO:2000310
GO:0005884	CC	actin filament	58	0.328263	0.598123	GO:0005884
GO:2001235	BP	positive regulation of apoptotic signaling pathway	24	0.328342	0.598123	GO:2001235
GO:0030168	BP	platelet activation	101	0.32847	0.598123	GO:0030168
GO:0006112	BP	energy reserve metabolic process	14	0.329033	0.598841	GO:0006112
GO:0034185	MF	apolipoprotein binding	15	0.329738	0.599815	GO:0034185
GO:1901800	BP	positive regulation of proteasomal protein catabolic process	19	0.330646	0.601035	GO:1901800
GO:0010595	BP	positive regulation of endothelial cell migration	56	0.330747	0.601035	GO:0010595
GO:0042119	BP	neutrophil activation	12	0.331255	0.601649	GO:0042119
GO:0033198	BP	response to ATP	15	0.331725	0.602195	GO:0033198
GO:0003887	MF	DNA-directed DNA polymerase activity	21	0.33202	0.602203	GO:0003887
GO:0006825	BP	copper ion transport	14	0.332147	0.602203	GO:0006825
GO:0034620	BP	cellular response to unfolded protein	16	0.332238	0.602203	GO:0034620
GO:0045595	BP	regulation of cell differentiation	24	0.333689	0.604524	GO:0045595
GO:0032464	BP	positive regulation of protein homooligomerization	10	0.334882	0.606375	GO:0032464
GO:0050727	BP	regulation of inflammatory response	63	0.335357	0.60666	GO:0050727
GO:0001917	CC	photoreceptor inner segment	43	0.335381	0.60666	GO:0001917
GO:0030904	CC	retromer complex	21	0.335768	0.607051	GO:0030904
GO:0000178	CC	exosome (RNase complex)	16	0.336075	0.607297	GO:0000178
GO:0070530	MF	K63-linked polyubiquitin modification-dependent protein binding	16	0.336811	0.608129	GO:0070530
GO:0032259	BP	methylation	66	0.336951	0.608129	GO:0032259
GO:0031941	CC	filamentous actin	19	0.337075	0.608129	GO:0031941
GO:0042053	BP	regulation of dopamine metabolic process	10	0.337221	0.608129	GO:0042053
GO:0005891	CC	voltage-gated calcium channel complex	21	0.337746	0.608765	GO:0005891
GO:0014067	BP	negative regulation of phosphatidylinositol 3-kinase signaling	16	0.338599	0.609993	GO:0014067
GO:0035253	CC	ciliary rootlet	10	0.339235	0.610829	GO:0035253
GO:0044291	CC	cell-cell contact zone	20	0.339452	0.61091	GO:0044291
GO:0001502	BP	cartilage condensation	19	0.339885	0.611164	GO:0001502
GO:0015171	MF	amino acid transmembrane transporter activity	28	0.339937	0.611164	GO:0015171
GO:0101031	CC	chaperone complex	10	0.341289	0.613054	GO:0101031
GO:0030507	MF	spectrin binding	27	0.34145	0.613054	GO:0030507
GO:0014894	BP	response to denervation involved in regulation of muscle adaptation	10	0.341608	0.613054	GO:0014894
GO:0005201	MF	extracellular matrix structural constituent	105	0.341679	0.613054	GO:0005201
GO:0000159	CC	protein phosphatase type 2A complex	14	0.343091	0.615189	GO:0000159
GO:0060068	BP	vagina development	10	0.343216	0.615189	GO:0060068
GO:0006506	BP	GPI anchor biosynthetic process	18	0.343791	0.615492	GO:0006506
GO:0034587	BP	piRNA metabolic process	15	0.343902	0.615492	GO:0034587
GO:0060444	BP	branching involved in mammary gland duct morphogenesis	10	0.34443	0.615492	GO:0060444
GO:0048147	BP	negative regulation of fibroblast proliferation	32	0.344492	0.615492	GO:0048147
GO:0051571	BP	positive regulation of histone H3-K4 methylation	15	0.344616	0.615492	GO:0051571
GO:0032809	CC	neuronal cell body membrane	24	0.344654	0.615492	GO:0032809
GO:0006665	BP	sphingolipid metabolic process	13	0.344931	0.615492	GO:0006665
GO:0090383	BP	phagosome acidification	28	0.345173	0.615492	GO:0090383
GO:0000050	BP	urea cycle	11	0.345188	0.615492	GO:0000050
GO:0001782	BP	B cell homeostasis	19	0.345344	0.615492	GO:0001782
GO:0003724	MF	RNA helicase activity	10	0.34581	0.615492	GO:0003724
GO:0086009	BP	membrane repolarization	10	0.345972	0.615492	GO:0086009
GO:0090656	BP	t-circle formation	12	0.345973	0.615492	GO:0090656
GO:0031639	BP	plasminogen activation	11	0.346051	0.615492	GO:0031639
GO:0006878	BP	cellular copper ion homeostasis	10	0.346185	0.615492	GO:0006878
GO:0010569	BP	regulation of double-strand break repair via homologous recombination	16	0.346342	0.615492	GO:0010569
GO:0030140	CC	trans-Golgi network transport vesicle	13	0.34662	0.615492	GO:0030140
GO:0071157	BP	negative regulation of cell cycle arrest	23	0.34687	0.615492	GO:0071157
[truncated: 1,555 more rows]

## Sheet: Sup. Table 3 Results regions
Supplementary Table S3. Signficant Differentially Methylated Regions
Chr	Start	End	Width	Number of CpGs	minfdr	Stouffer	maxbetafc	meanbetafc	Gene	Overlapping Promoters
10	48208808	48208812	5	2	1.39077e-15	0.00280211	-0.0734212	-0.0509448	RNA5SP313	RNA5SP313-201
7	150648283	150648497	215	2	4.21869e-15	0.00752823	-0.0600409	-0.0316795	NA	NA
2	217675069	217675198	130	2	1.08326e-13	0.00944008	-0.0488546	-0.0320632	NA	NA
4	128981985	128982454	470	5	1.47391e-11	0.0157244	0.00914337	0.00558791	LARP1B	LARP1B-201	LARP1B-001	LARP1B-202	LARP1B-003	LARP1B-203	LARP1B-004	LARP1B-204	LARP1B-002	LARP1B-005
5	177557697	177557817	121	3	2.64964e-10	0.017298	0.00524641	0.00380663	RMND5B	RMND5B-001	RMND5B-011	RMND5B-008	RMND5B-003	RMND5B-007	RMND5B-009	RMND5B-002	RMND5B-201
12	105724410	105724818	409	4	2.73991e-10	0.0191355	0.00503674	0.0042712	C12orf75	C12orf75-001	C12orf75-005	C12orf75-003	C12orf75-008	C12orf75-006
19	19779476	19779880	405	6	4.70316e-16	0.0200501	0.0165511	0.00856401	ZNF101	ZNF101-001	ZNF101-005	ZNF101-002	ZNF101-003	ZNF101-004
5	1295073	1295274	202	3	5.57689e-11	0.0203045	0.0150813	0.00772123	TERT	TERT-201	TERT-001	TERT-005	TERT-004	TERT-006	TERT-008
4	85887382	85887769	388	5	2.12013e-13	0.0211183	0.0201205	0.00889235	WDFY3	WDFY3-001	WDFY3-AS2-002	WDFY3-201	WDFY3-AS2-001	WDFY3-006	WDFY3-005
6	110299415	110299618	204	5	2.63618e-12	0.0220173	0.00901922	0.00501603	GPR6	GPR6-001	GPR6-201
4	6784379	6785080	702	4	4.39771e-12	0.0229474	0.0162935	0.00821805	KIAA0232	KIAA0232-001	KIAA0232-201	KIAA0232-003	KIAA0232-004
6	7142610	7142638	29	2	2.31198e-09	0.0239973	-0.0129414	-0.00928752	NA	NA
4	1795490	1795506	17	3	2.18349e-09	0.0241045	0.0122679	0.00669961	FGFR3	FGFR3-001	FGFR3-201	FGFR3-002	FGFR3-202	FGFR3-203	FGFR3-006
18	21083211	21083641	431	7	4.38083e-12	0.0252293	0.00665258	0.00440853	C18orf8	C18orf8-001	C18orf8-007	C18orf8-005	C18orf8-003	C18orf8-008	C18orf8-004	C18orf8-002	C18orf8-006
12	48744457	48744556	100	3	5.66508e-12	0.025658	0.0121111	0.00733783	ZNF641	ZNF641-201	ZNF641-003	ZNF641-001	ZNF641-006	RP11-370I10.6-001	ZNF641-008	ZNF641-010	ZNF641-004	ZNF641-005
1	2193454	2193741	288	2	5.94023e-12	0.0273602	-0.134034	-0.0718233	NA	NA
8	22436420	22436813	394	5	1.87264e-10	0.0276055	0.0253882	0.00795258	PDLIM2	PDLIM2-004	PDLIM2-001	PDLIM2-201	PDLIM2-202	PDLIM2-002	PDLIM2-005	PDLIM2-003	PDLIM2-014	PDLIM2-012	PDLIM2-013	PDLIM2-011	PDLIM2-009	PDLIM2-008
12	6652176	6652604	429	3	8.6652e-14	0.0295698	-0.0899678	-0.0577822	RP5	RP5-940J5.8-001
11	2595718	2595800	83	2	5.08521e-18	0.0297479	-0.0358134	-0.0266135	NA	NA
11	33757569	33758121	553	5	1.22328e-12	0.0299525	0.00596365	0.00464192	CD59	CD59-001	CD59-002	CD59-005	CD59-006	CD59-010
1	1446840	1447567	728	9	6.67511e-14	0.0329082	0.00946403	0.0036056	ATAD3A	ATAD3A-002	ATAD3A-003	ATAD3A-001	ATAD3A-201
1	43997446	43997516	71	2	2.65243e-10	0.0331402	0.0289985	0.0186993	PTPRF	PTPRF-001	PTPRF-003	PTPRF-002
10	43600706	43601095	390	3	2.45164e-12	0.0332182	0.00892199	0.00584299	RET	RET-004
4	85504048	85504053	6	3	1.53672e-09	0.0370511	0.0124607	0.00681586	CDS1	CDS1-001	CDS1-002
5	158758075	158758139	65	2	3.10447e-11	0.0380936	0.143234	0.0849692	IL12B	IL12B-001	AC008697.1-001
16	87416985	87417448	464	6	6.67779e-11	0.0391968	0.00749461	0.00372954	FBXO31	FBXO31-001	MAP1LC3B-007	MAP1LC3B-006	FBXO31-004	FBXO31-002
20	11871743	11872261	519	4	5.37186e-12	0.0395183	0.00851771	0.00663032	BTBD3	BTBD3-002	BTBD3-003	BTBD3-001	BTBD3-005	BTBD3-006	BTBD3-004
11	8284312	8284746	435	2	1.71872e-16	0.0404624	0.0224873	0.0138852	LMO1	LMO1-001	LMO1-002	LMO1-004
16	1755402	1756061	660	6	3.58802e-11	0.0418175	0.0470919	0.0100328	MAPK8IP3	MAPK8IP3-001	MAPK8IP3-007	MAPK8IP3-003	MAPK8IP3-002
19	58740253	58740455	203	3	7.77138e-10	0.0431797	0.00439557	0.00291901	ZNF544	ZNF544-201	ZNF544-202	ZNF544-013	ZNF544-010	ZNF544-017	ZNF544-012	ZNF544-002	ZNF544-005	ZNF544-003	ZNF544-016	ZNF544-011	ZNF544-009	ZNF544-015	ZNF544-001	ZNF544-018	ZNF544-007	CTD-3138B18.4-001	ZNF544-004	ZNF544-006	ZNF544-014	ZNF544-008
1	16085597	16085642	46	2	3.54561e-10	0.0440492	0.0239501	0.0131587	FBLIM1	FBLIM1-002	FBLIM1-201	FBLIM1-007	FBLIM1-012	FBLIM1-011	FBLIM1-013	FBLIM1-010
18	48086302	48086680	379	6	3.32703e-10	0.0440677	0.0158099	0.00779316	MAPK4	MAPK4-001	MAPK4-005	MAPK4-003	MAPK4-002
6	158981441	158981615	175	2	3.74829e-10	0.0452931	0.0112831	0.00681395	NA	NA
1	179712281	179713349	1069	7	9.96681e-17	0.0455726	0.040491	0.0108318	FAM163A	FAM163A-001	RP11-12M5.1-002
8	146012773	146012904	132	4	1.22279e-09	0.0455941	0.0055199	0.00425664	ZNF34	ZNF34-006	ZNF34-002	ZNF34-004	ZNF34-003
2	70995349	70995522	174	6	8.06668e-10	0.047743	0.00963858	0.00623572	ADD2	ADD2-001	ADD2-002	ADD2-007	ADD2-008	ADD2-005	ADD2-010	ADD2-006	ADD2-012	ADD2-013	ADD2-011
1	934390	934662	273	3	7.18967e-10	0.0478179	0.0160444	0.0075214	HES4	HES4-001	HES4-002	HES4-003	HES4-004	RP11-54O7.17-001
18	55102754	55102922	169	5	2.01953e-12	0.051191	0.0285976	0.0162112	ONECUT2	ONECUT2-001	AC090340.1-201
3	196730265	196730303	39	3	1.3515e-09	0.0530695	0.0218454	0.010811	MFI2	MFI2-AS1-004	MFI2-AS1-001	MFI2-AS1-003	MFI2-AS1-005	MFI2-009
1	204121458	204121503	46	4	7.8266e-10	0.0531654	0.0059054	0.00385854	ETNK2	ETNK2-202	ETNK2-002	ETNK2-001	ETNK2-010
1	38259386	38259884	499	8	7.33331e-12	0.0537728	0.0148492	0.00515889	MANEAL	MANEAL-001	MANEAL-002	MANEAL-005	MANEAL-003	MANEAL-004
5	1769385	1769471	87	2	1.34369e-10	0.0544798	-0.0122387	-0.0121025	NA	NA
7	65670215	65670474	260	4	1.55797e-09	0.0557148	0.00508426	0.00375261	TPST1	TPST1-001	TPST1-003	TPST1-002
7	44788027	44788431	405	7	7.6767e-10	0.0632669	0.00682991	0.00391552	ZMIZ2	ZMIZ2-001	ZMIZ2-003	ZMIZ2-008	ZMIZ2-007
3	190231663	190231933	271	6	7.944e-10	0.0636441	0.00640773	0.00310941	IL1RAP	IL1RAP-001	IL1RAP-006	IL1RAP-009	IL1RAP-201	IL1RAP-004	IL1RAP-003	IL1RAP-010	IL1RAP-008	IL1RAP-007	IL1RAP-002	IL1RAP-202	IL1RAP-005	IL1RAP-012	IL1RAP-011	IL1RAP-013
21	43639067	43639122	56	5	2.20599e-09	0.0641386	0.00504882	0.0039948	ABCG1	ABCG1-005	ABCG1-006	ABCG1-001	ABCG1-010
16	84224901	84225080	180	2	1.56668e-14	0.0649918	-0.0482671	-0.0251258	ADAD2	ADAD2-001	ADAD2-004	ADAD2-003	ADAD2-006	ADAD2-007
14	94640653	94640828	176	2	1.82332e-10	0.0651224	0.0311201	0.0218454	PPP4R4	PPP4R4-001	PPP4R4-002	PPP4R4-006	PPP4R4-004	PPP4R4-005
15	41136353	41136779	427	7	3.5509e-10	0.0659344	0.00528773	0.00355045	SPINT1	SPINT1-001	SPINT1-201	SPINT1-003	SPINT1-006	RP11-532F12.5-004	RP11-532F12.5-001	RP11-532F12.5-005	RP11-532F12.5-002	SPINT1-005	SPINT1-013
6	159240077	159240453	377	5	1.1495e-10	0.0659713	0.0132214	0.005926	EZR	EZR-002	EZR-001	EZR-201	EZR-AS1-001	EZR-003
17	1953268	1953823	556	8	1.17923e-11	0.0661591	0.0196157	0.0072562	MIR212	MIR212-001	MIR132-001
8	134583731	134584692	962	7	3.06751e-12	0.067772	0.0113331	0.00646349	ST3GAL1	ST3GAL1-201	ST3GAL1-005	ST3GAL1-002	ST3GAL1-006	ST3GAL1-001	ST3GAL1-004	ST3GAL1-003	ST3GAL1-013	RP11-629O1.2-001
14	92572917	92573075	159	5	9.69307e-10	0.0687639	0.0221124	0.00408735	ATXN3	ATXN3-003	ATXN3-002	ATXN3-001	ATXN3-201	ATXN3-006	ATXN3-004	ATXN3-005	ATXN3-011	ATXN3-008	ATXN3-010	ATXN3-012	ATXN3-007	ATXN3-015	ATXN3-202	ATXN3-044	ATXN3-045	ATXN3-024	ATXN3-032	ATXN3-048	ATXN3-039	ATXN3-033	ATXN3-025	ATXN3-034	ATXN3-043	ATXN3-046	ATXN3-026	ATXN3-019	ATXN3-022	ATXN3-040	ATXN3-017	ATXN3-021	ATXN3-038	ATXN3-049	ATXN3-029	ATXN3-036	ATXN3-035	ATXN3-027	ATXN3-037	ATXN3-031	ATXN3-023
12	1099985	1100388	404	7	7.54792e-12	0.068812	0.0153163	0.00569813	ERC1	ERC1-008	ERC1-014	ERC1-201	RAD52-008	ERC1-013	RP11-359B12.2-004	RP11-359B12.2-001	ERC1-010	ERC1-001	RP11-359B12.2-003	ERC1-005	RP11-359B12.2-002	ERC1-004	ERC1-015	ERC1-023	ERC1-006
10	17244376	17244758	383	4	5.2599e-10	0.0695373	-0.0695027	-0.0386447	TRDMT1	TRDMT1-201	TRDMT1-006	TRDMT1-202	TRDMT1-203	TRDMT1-001	TRDMT1-204	TRDMT1-008	TRDMT1-010	TRDMT1-205	TRDMT1-011	TRDMT1-012	TRDMT1-005	TRDMT1-007	TRDMT1-002
1	211751907	211752620	714	6	3.56042e-12	0.0696899	0.00639183	0.00383152	SLC30A1	SLC30A1-001
12	75604326	75604484	159	2	2.79253e-10	0.0702284	-0.13487	-0.0816721	KCNC2	KCNC2-201	KCNC2-202	KCNC2-004	KCNC2-002	KCNC2-003	KCNC2-001
5	61602044	61602127	84	5	2.95338e-11	0.0718488	0.00843475	0.00508181	KIF2A	KIF2A-001	KIF2A-003	KIF2A-002	KIF2A-007	KIF2A-010	KIF2A-004	KIF2A-006
5	37249405	37249599	195	3	7.1353e-10	0.0718549	0.00825723	0.00619977	C5orf42	C5orf42-201	C5orf42-202	C5orf42-001
11	129900945	129901261	317	2	6.37114e-12	0.0719355	-0.0961286	-0.0519842	TCEB2P2	TCEB2P2-001	TCEB2P2-201
16	87426147	87426171	25	3	1.75544e-10	0.0741013	0.00794742	0.00552731	MAP1LC3B	MAP1LC3B-001	MAP1LC3B-201	MAP1LC3B-004	MAP1LC3B-003	MAP1LC3B-005	FBXO31-007	FBXO31-008	MAP1LC3B-002
9	133588314	133588623	310	2	2.68353e-10	0.0746611	0.0120646	0.00758635	ABL1	ABL1-002	ABL1-003
5	176900001	176900447	447	6	3.78501e-10	0.075347	0.00333682	0.00200887	DBN1	DBN1-002	DBN1-001	DBN1-004	DBN1-003	DBN1-009	DBN1-010	DBN1-011	DBN1-008
2	74374909	74375507	599	8	1.04278e-13	0.0771754	0.00977738	0.00439279	BOLA3	BOLA3-002	BOLA3-001	BOLA3-AS1-001	BOLA3-004	BOLA3-003	BOLA3-AS1-002	BOLA3-AS1-003
3	48130378	48130514	137	4	4.18214e-10	0.0775592	0.0278963	0.0156526	MAP4	MAP4-001	MAP4-202	MAP4-006	MAP4-005	MAP4-003	MAP4-014
19	5112710	5112928	219	2	1.19739e-14	0.0777821	-0.0587214	-0.0242915	KDM4B	KDM4B-010
19	55770037	55770062	26	5	2.13555e-09	0.0779737	0.00980078	0.00459197	PPP6R1	PPP6R1-001
12	49483619	49484169	551	7	2.56999e-11	0.078464	-0.00682741	0.00283925	RP11	RP11-386G11.8-002	RP11-386G11.8-001
4	184366198	184366236	39	3	5.01148e-10	0.0790389	0.0242502	0.015961	CDKN2AIP	CDKN2AIP-002	CDKN2AIP-006	CDKN2AIP-001	CDKN2AIP-005	CDKN2AIP-004
8	95716654	95716890	237	2	4.66006e-13	0.0820291	-0.146573	-0.0839125	ESRP1	ESRP1-007
8	67525656	67525849	194	3	5.36277e-10	0.0829397	0.0343141	0.0137644	MYBL1	MYBL1-006	MYBL1-003	MYBL1-001	MYBL1-005	MYBL1-002
5	60139708	60139941	234	3	7.28064e-11	0.0836795	0.0100661	0.00548586	ELOVL7	ELOVL7-201	ELOVL7-202	ELOVL7-002	ELOVL7-003	ELOVL7-001	ELOVL7-004	ELOVL7-005
5	133340302	133340577	276	6	7.67375e-10	0.0852557	0.0119966	0.00655443	VDAC1	VDAC1-002	VDAC1-003	VDAC1-001	VDAC1-004	VDAC1-005	CTB-113I20.2-001
1	85155872	85156269	398	4	5.66807e-10	0.0859272	0.0104484	0.00736833	SSX2IP	SSX2IP-001	SSX2IP-201	SSX2IP-007	SSX2IP-202	SSX2IP-002	SSX2IP-006	SSX2IP-009	SSX2IP-008
1	211432377	211432754	378	7	4.58781e-10	0.0861931	0.00416759	0.00300807	RCOR3	RCOR3-001	RCOR3-002	RCOR3-006	RCOR3-007	RCOR3-003	RCOR3-009	RCOR3-008	RCOR3-010	RCOR3-012	RCOR3-011
19	38397635	38397769	135	6	2.32684e-09	0.0870264	0.0072739	0.00392768	SIPA1L3	SIPA1L3-001	WDR87-002	WDR87-001	WDR87-003	SIPA1L3-004
1	228634724	228634806	83	2	1.34131e-09	0.087416	-0.0704897	-0.0460475	NA	NA
20	32972747	32972757	11	2	9.00986e-15	0.0878703	-0.12393	-0.064368	Y_RNA.284	Y_RNA.284-201
5	133450238	133450709	472	5	2.67834e-11	0.0883549	0.0118059	0.00533752	TCF7	TCF7-201	TCF7-202	TCF7-001	TCF7-004	TCF7-203	TCF7-003	TCF7-002	TCF7-204	TCF7-020	TCF7-011	TCF7-010	TCF7-006	TCF7-017	TCF7-013	TCF7-018	TCF7-024	TCF7-012	TCF7-015	TCF7-005
20	62680970	62681003	34	6	2.49296e-09	0.0891666	0.0159863	0.00609803	SOX18	SOX18-001	ZNF512B-202	TCEA2-010
16	30087031	30087414	384	5	9.81933e-12	0.089168	0.0179826	0.00690734	PPP4C	PPP4C-001	PPP4C-008	PPP4C-007	PPP4C-014	PPP4C-003	PPP4C-004	PPP4C-005	PPP4C-012	PPP4C-002	PPP4C-010	PPP4C-006	PPP4C-009	PPP4C-013
19	899547	899652	106	3	2.75558e-11	0.0905329	-0.0331118	-0.0091473	R3HDM4	R3HDM4-008
7	75988212	75988247	36	2	1.81107e-09	0.0917204	0.00878675	0.00739112	YWHAG	YWHAG-001
22	18893811	18894283	473	4	3.31489e-12	0.0972221	0.0117486	0.00601469	DGCR6	DGCR6-001	DGCR6-002	DGCR6-006	DGCR6-003	DGCR6-007	DGCR6-005	DGCR6-004	DGCR6-008
17	48943588	48943872	285	6	2.92347e-10	0.0987537	0.0150593	0.00754822	TOB1	TOB1-002	TOB1-AS1-001	TOB1-001	TOB1-003	TOB1-AS1-002	TOB1-AS1-004
8	22423014	22423091	78	4	1.82671e-09	0.103186	0.00629106	0.00443551	SORBS3	SORBS3-201	RP11-582J16.3-001	SORBS3-018	SORBS3-013	SORBS3-009	SORBS3-016	SORBS3-011	SORBS3-012	SORBS3-019	SORBS3-021	SORBS3-010	SORBS3-014	SORBS3-020
6	158210955	158211003	49	2	3.06751e-12	0.103373	-0.0435947	-0.0265704	NA	NA
6	150184969	150185369	401	4	4.888e-10	0.104013	0.00799663	0.00390816	LRP11	LRP11-001	LRP11-002	LRP11-201	RP11-244K5.8-201	RP11-244K5.8-001
7	151216272	151216373	102	3	1.20264e-10	0.108741	0.0483168	0.0178638	RHEB	RHEB-001	RHEB-007	RHEB-003	RHEB-004	RHEB-002
2	63277672	63277708	37	3	4.16827e-10	0.108996	0.0233616	0.0111308	OTX1	OTX1-001	OTX1-002	OTX1-005	AC009501.4-002	OTX1-006	OTX1-004	OTX1-003
12	112819495	112820060	566	5	1.57087e-10	0.109185	0.0184471	0.00665486	HECTD4	HECTD4-201	HECTD4-202	HECTD4-001	HECTD4-006
10	93335091	93335196	106	3	1.41599e-09	0.109827	0.126598	0.039878	NA	NA
20	25176379	25176907	529	4	4.28354e-10	0.113514	0.0120886	0.00556891	ENTPD6	ENTPD6-004	ENTPD6-005	ENTPD6-020	ENTPD6-008	ENTPD6-013	ENTPD6-014	ENTPD6-012	ENTPD6-019	ENTPD6-009	ENTPD6-007	ENTPD6-010
18	61034556	61034973	418	8	3.09927e-10	0.116547	0.0199537	0.00594307	KDSR	KDSR-010	KDSR-001	KDSR-006	KDSR-005	KDSR-008	RP11-635N19.1-001	KDSR-004	KDSR-013
13	21635420	21635427	8	2	7.62365e-10	0.118039	0.00629521	0.00437484	LATS2	LATS2-001	LATS2-201
17	53498958	53499213	256	3	1.54411e-09	0.119538	0.0112998	0.00569549	MMD	MMD-001	MMD-003	MMD-004
1	150551925	150551983	59	3	1.99746e-09	0.120358	0.00766985	0.00584098	MCL1	MCL1-002	MCL1-001	MCL1-003
1	43919477	43919813	337	8	1.92059e-10	0.120898	0.0194563	0.0064771	HYI	HYI-201	HYI-202	HYI-003	HYI-001	HYI-002	HYI-005	HYI-004	HYI-AS1-001	HYI-011	HYI-008	HYI-009	HYI-006	HYI-010	HYI-203
3	44551900	44552139	240	3	5.5558e-11	0.121592	0.0668613	0.0249376	ZNF852	ZNF852-001	ZNF852-002
7	130353136	130353913	778	9	4.59125e-12	0.12165	0.0278767	0.0091701	COPG2	COPG2-002	COPG2-201
7	144107974	144108266	293	3	4.11415e-13	0.122062	-0.0677937	-0.00483708	NOBOX	NOBOX-002	NOBOX-001
17	8370397	8370548	152	3	2.98116e-10	0.124509	-0.0329388	-0.0167422	NA	NA
11	111473361	111473380	20	2	1.70947e-09	0.125034	0.00729662	0.004818	SIK2	SIK2-001
9	138987085	138987818	734	7	1.74745e-11	0.125457	-0.022774	0.00167683	NACC2	NACC2-201
10	105253551	105253716	166	4	4.55076e-10	0.129596	0.0128617	0.00578635	NEURL1	NEURL1-001
2	20212423	20212831	409	8	6.57763e-11	0.129919	0.0300136	0.00539655	MATN3	MATN3-001	MATN3-201
6	170893725	170894141	417	9	7.54204e-13	0.132079	0.0137564	0.00430381	PDCD2	PDCD2-009	PDCD2-007	PDCD2-004	PDCD2-002	PDCD2-005	PDCD2-014	PDCD2-011	PDCD2-001	PDCD2-006	PDCD2-003	PDCD2-013	PDCD2-012	PDCD2-010
2	232394702	232395061	360	4	2.96593e-10	0.132547	0.00875806	0.00574652	NMUR1	NMUR1-001
16	30886591	30886742	152	2	1.32279e-09	0.132886	0.0044416	0.00300349	MIR4519	MIR4519-003	MIR4519-001	MIR4519-002	MIR4519-201
22	41032662	41032833	172	8	1.45989e-09	0.133838	0.00494052	0.00299375	MKL1	MKL1-001	MKL1-201	MKL1-002	MKL1-004	MKL1-005
19	32896872	32897255	384	7	9.15628e-10	0.133897	0.00355334	0.00285291	DPY19L3	DPY19L3-001	DPY19L3-201	DPY19L3-002	DPY19L3-007	DPY19L3-003	DPY19L3-013	AC007773.2-001	AC007773.3-201	AC007773.2-201
1	155145180	155145555	376	6	1.12228e-10	0.135482	0.00416591	0.00300358	KRTCAP2	KRTCAP2-001	TRIM46-001	TRIM46-002	TRIM46-004	TRIM46-003	TRIM46-201	KRTCAP2-011	KRTCAP2-005	TRIM46-007	TRIM46-006	KRTCAP2-009	TRIM46-005	KRTCAP2-012	KRTCAP2-008	KRTCAP2-003	KRTCAP2-006	KRTCAP2-010	KRTCAP2-004	TRIM46-202	TRIM46-203
16	3451187	3451472	286	5	8.59781e-11	0.140046	0.00489404	0.00206554	ZNF174	ZNF174-001	ZSCAN32-001	ZNF174-002	ZSCAN32-002	ZSCAN32-004	ZSCAN32-007	ZSCAN32-012	ZNF174-005	ZNF174-003	ZSCAN32-005	ZSCAN32-011	ZNF174-004	ZSCAN32-006
7	143058944	143059300	357	5	8.891e-11	0.145376	0.072303	0.0186578	FAM131B	FAM131B-004	FAM131B-002	FAM131B-005	FAM131B-003	FAM131B-001	FAM131B-007	FAM131B-008	FAM131B-009	RP11-563K23.1-001
10	32217547	32217968	422	9	1.14405e-09	0.146746	0.00611099	0.00437072	ARHGAP12	ARHGAP12-009	ARHGAP12-201	ARHGAP12-008	ARHGAP12-202
11	65383542	65383549	8	2	1.43613e-09	0.148373	0.00685119	0.0060618	MAP3K11	MAP3K11-001	PCNXL3-001	MAP3K11-002	MAP3K11-012	MAP3K11-003	MAP3K11-013
6	56819912	56820386	475	5	4.17003e-12	0.149736	0.00773003	0.00441688	BEND6	BEND6-003	BEND6-004	BEND6-201	BEND6-202	DST-202	DST-009
3	148709334	148709802	469	7	3.69138e-10	0.152528	0.0222461	0.00986176	GYG1	GYG1-002	GYG1-001	GYG1-008	GYG1-009	GYG1-006	GYG1-003	GYG1-004	GYG1-007
7	77428232	77428337	106	3	1.54373e-10	0.154154	0.00231236	0.00210186	TMEM60	TMEM60-001	PHTF2-002	PHTF2-003	PHTF2-004	PHTF2-001	PHTF2-010
3	130745442	130745959	518	14	2.7704e-12	0.154306	0.0521036	0.0131242	ASTE1	ASTE1-001	NEK11-201	NEK11-003	NEK11-202	NEK11-203	ASTE1-007	ASTE1-009	ASTE1-005	NEK11-002	NEK11-001	NEK11-017	ASTE1-002	ASTE1-006	NEK11-009	NEK11-006	NEK11-005	NEK11-004	NEK11-019	ASTE1-003	NEK11-007
3	49591628	49591974	347	7	2.46833e-13	0.156801	0.0767088	0.0162556	BSN	BSN-001	BSN-AS2-001	BSN-AS2-003
10	43724742	43725411	670	8	2.01056e-11	0.157623	0.0213145	0.00556749	RASGEF1A	RASGEF1A-002
4	668131	668309	179	5	1.3469e-09	0.158033	0.0174462	0.00537274	ATP5I	ATP5I-001	MYL5-005	MYL5-003	MYL5-009	ATP5I-002	ATP5I-003	MYL5-002	MYL5-004	ATP5I-005	ATP5I-004
21	27011788	27012066	279	4	3.26432e-10	0.159382	0.0265196	0.00972478	JAM2	JAM2-201	JAM2-003	JAM2-202	JAM2-001
6	33160604	33160976	373	7	1.29876e-10	0.162222	-0.0263488	-0.000817117	COL11A2	COL11A2-201	COL11A2-202	COL11A2-203	COL11A2-001	COL11A2-204	COL11A2-205	COL11A2-206	COL11A2-003	COL11A2-207	COL11A2-002
4	56412743	56412880	138	3	1.45952e-09	0.16286	0.00379431	0.0033431	CLOCK	CLOCK-002	CLOCK-010	CLOCK-011	CLOCK-009	CLOCK-008	CLOCK-001	RP11-528I4.2-001
8	90914101	90914612	512	3	4.61884e-10	0.163024	-0.01417	-0.000131293	OSGIN2	OSGIN2-002	RNU6-925P-201	OSGIN2-001	OSGIN2-003
1	8938701	8938815	115	5	6.65785e-10	0.163455	0.00548727	0.00322033	ENO1	ENO1-001	ENO1-IT1-001	ENO1-AS1-001	ENO1-005	ENO1-008	ENO1-006	ENO1-004
15	31507807	31508272	466	7	2.51671e-12	0.166234	0.027918	0.00683758	RP11	RP11-16E12.1-002	RP11-16E12.1-001
11	64059453	64059594	142	3	3.96785e-10	0.16928	0.00542836	0.00324185	KCNK4	KCNK4-003	KCNK4-001	KCNK4-005	KCNK4-006	KCNK4-007	RP11-783K16.10-001	KCNK4-002	KCNK4-008	KCNK4-004	KCNK4-009
19	3802504	3802558	55	2	3.1997e-10	0.170199	-0.0758574	-0.0435532	MATK	MATK-001	MATK-014	MATK-005	MATK-011	MATK-012	MATK-013
2	101436923	101436927	5	2	1.75759e-09	0.171015	0.00336508	0.0030345	NPAS2	NPAS2-001	NPAS2-004	NPAS2-201
12	132378994	132379564	571	8	9.46007e-11	0.171251	0.0963046	0.0137973	ULK1	ULK1-001
11	61734675	61735327	653	8	1.32172e-11	0.172318	0.00676096	0.00301375	FTH1	FTH1-001	FTH1-003	FTH1-005	FTH1-011	FTH1-006	FTH1-007	FTH1-010	FTH1-004	FTH1-008	FTH1-002	FTH1-009	AP003733.1-201
1	21044031	21044770	740	8	1.67757e-12	0.174274	0.00808428	0.00366683	KIF17	KIF17-009	KIF17-001	KIF17-004
5	179160673	179160712	40	2	2.93132e-10	0.175514	0.0291518	0.0186363	MAML1	MAML1-001	MAML1-005
17	35715686	35716418	733	8	1.43593e-11	0.175717	0.0196083	0.00540922	ACACA	ACACA-008	ACACA-009	ACACA-011	ACACA-018
2	27717709	27718336	628	8	4.09079e-11	0.176452	0.00978514	0.00469423	FNDC4	FNDC4-001	GCKR-001	GCKR-003	GCKR-201	GCKR-004	GCKR-002	FNDC4-003	FNDC4-002
7	43908858	43909259	402	7	2.84075e-11	0.178443	0.0397924	0.00808888	MRPS24	MRPS24-001	MRPS24-002	MRPS24-004	MRPS24-003	MRPS24-005
10	99446788	99447216	429	7	7.25234e-11	0.179422	0.00655609	0.00311194	AVPI1	AVPI1-001
20	37554817	37555079	263	7	4.86085e-10	0.17962	0.029628	0.00681787	FAM83D	FAM83D-001
3	171758173	171758366	194	6	1.64199e-10	0.185495	0.0156359	0.00575354	FNDC3B	FNDC3B-001	FNDC3B-201	FNDC3B-004	FNDC3B-002	FNDC3B-008	FNDC3B-005
5	32174322	32174578	257	5	2.6105e-12	0.187554	0.0230465	0.00698269	GOLPH3	GOLPH3-001	GOLPH3-004	GOLPH3-003	CTD-2186M15.3-001
19	3464765	3465071	307	5	6.7719e-13	0.188546	-0.0710237	-0.0149214	NA	NA
14	71275530	71275936	407	6	7.89063e-11	0.190308	0.0087449	0.00371321	MAP3K9	MAP3K9-003	RP6-65G23.3-002	MAP3K9-001	MAP3K9-002	RP6-65G23.3-001
13	77460298	77460723	426	8	3.47732e-10	0.193307	0.0129681	0.00469204	KCTD12	KCTD12-201	KCTD12-001	AC000403.1-201
19	17322527	17322956	430	4	5.96047e-15	0.193534	-0.0608337	-0.0219836	MYO9B	MYO9B-017	MYO9B-018
18	48572727	48572756	30	2	1.15255e-10	0.193975	-0.104738	-0.0581831	SMAD4	SMAD4-004	SMAD4-011	SMAD4-010	SMAD4-005
2	27651571	27652102	532	3	1.77233e-12	0.194435	0.0254334	0.0106065	NRBP1	NRBP1-001	NRBP1-002	NRBP1-003	NRBP1-006
3	52809942	52810468	527	4	2.64922e-16	0.195942	-0.0476646	-0.0227313	ITIH1	ITIH1-001	ITIH1-004	ITIH1-203
10	133835822	133835927	106	3	1.39992e-09	0.198134	-0.0262675	-0.0185999	NA	NA
9	130649009	130649107	99	3	3.53174e-11	0.198606	-0.019435	-0.0090754	RP11	RP11-203J24.9-003	RP11-203J24.9-001
11	62554681	62554900	220	4	8.23524e-12	0.199598	0.00438692	0.00256239	TMEM179B	TMEM179B-001	TMEM179B-004	TMEM179B-005	TMEM179B-003	TMEM179B-002	RP11-727F15.12-001
22	45405333	45405627	295	4	8.01461e-10	0.200356	0.00503487	0.00278144	PHF21B	PHF21B-001	PHF21B-201	PHF21B-003	PHF21B-202	PHF21B-010	PHF21B-008	PHF21B-203	PHF21B-005	PHF21B-007	PHF21B-004	PHF21B-006
1	2344089	2344586	498	9	3.85273e-10	0.203119	0.0422413	0.00750294	PEX10	PEX10-001	PEX10-002	PEX10-008	PEX10-007	PEX10-003	PEX10-004	PEX10-005	PEX10-006
22	31088724	31088964	241	2	5.02122e-13	0.203996	-0.117202	-0.0562817	OSBP2	OSBP2-001	OSBP2-201	OSBP2-202	OSBP2-002	OSBP2-010	OSBP2-005
3	24536323	24537407	1085	15	3.0488e-13	0.205565	0.0155781	0.00375773	THRB	THRB-001	THRB-201	THRB-011	THRB-005	THRB-004	THRB-012	THRB-009	THRB-008	THRB-AS1-001	THRB-AS1-002	THRB-010	THRB-006	THRB-002	THRB-AS1-004	THRB-AS1-005
2	54013931	54014491	561	13	5.56355e-10	0.206399	0.00659673	0.0030595	ERLEC1	ERLEC1-001	GPR75-ASB3-001	ERLEC1-002	GPR75-ASB3-002	ERLEC1-003	GPR75-ASB3-003	GPR75-ASB3-009	GPR75-ASB3-018	ERLEC1-005
17	48638091	48638103	13	3	1.38547e-09	0.209115	0.00415245	0.00269001	CACNA1G	CACNA1G-001	CACNA1G-201	CACNA1G-027	CACNA1G-013	CACNA1G-008	CACNA1G-023	CACNA1G-007	CACNA1G-019	CACNA1G-031	CACNA1G-017	CACNA1G-005	CACNA1G-033	CACNA1G-014	CACNA1G-032	CACNA1G-AS1-002	CACNA1G-AS1-001	CACNA1G-012	CACNA1G-011	CACNA1G-009	CACNA1G-016	CACNA1G-028	CACNA1G-AS1-003	CACNA1G-018	CACNA1G-004	CACNA1G-010	CACNA1G-030	CACNA1G-024	CACNA1G-015	CACNA1G-002	CACNA1G-026	CACNA1G-021	CACNA1G-003	CACNA1G-020	CACNA1G-034	CACNA1G-025
3	197024963	197025150	188	5	7.62595e-10	0.210852	0.01673	0.00763352	DLG1	DLG1-201	DLG1-001	DLG1-202	DLG1-003	DLG1-006	DLG1-013	DLG1-002	DLG1-AS1-002	DLG1-018	DLG1-008	DLG1-009	DLG1-019	DLG1-AS1-001	DLG1-004	DLG1-005	DLG1-007	DLG1-027	DLG1-023	DLG1-017	DLG1-010	DLG1-022
20	48532070	48532416	347	8	3.57494e-11	0.212283	0.0273589	0.00738501	SPATA2	SPATA2-001	SPATA2-201	SPATA2-202
12	124246434	124246976	543	8	9.0622e-10	0.214674	0.00701914	0.00348955	DNAH10	DNAH10-001
18	34408844	34409063	220	8	4.69144e-10	0.217701	-0.00383138	0.00148627	KIAA1328	KIAA1328-001	TPGS2-001	TPGS2-002	KIAA1328-201	KIAA1328-202	TPGS2-007	TPGS2-019	KIAA1328-008	TPGS2-017	TPGS2-006	TPGS2-016	TPGS2-009	TPGS2-005	TPGS2-018	KIAA1328-004	TPGS2-010	TPGS2-004	TPGS2-008	TPGS2-011	KIAA1328-003	KIAA1328-002	TPGS2-003
16	66834841	66834984	144	2	3.83809e-10	0.22014	-0.0144849	-0.00295551	CCDC79	CCDC79-001	CCDC79-201	CCDC79-202	CCDC79-203	CCDC79-204	CCDC79-003	CCDC79-005	CCDC79-004
11	8932380	8932965	586	11	1.12824e-11	0.221228	0.0117737	0.00421627	AKIP1	AKIP1-005	AKIP1-004	AKIP1-001	AKIP1-009	AKIP1-006	AKIP1-002	AKIP1-003	AKIP1-011	AKIP1-008	ST5-012	ST5-001	AKIP1-010	AKIP1-007
1	38274017	38274248	232	3	1.27766e-09	0.221744	0.0153305	0.00922845	C1orf122	C1orf122-001	C1orf122-002	YRDC-001	C1orf122-006	C1orf122-201	C1orf122-003
19	1237242	1237453	212	2	7.26724e-11	0.223186	0.0152984	0.00891173	C19orf26	C19orf26-201	C19orf26-202	C19orf26-002	C19orf26-001	AC004221.2-001
12	57082088	57082200	113	4	1.94202e-09	0.231145	0.00445909	0.00281691	PTGES3	PTGES3-001	PTGES3-003	PTGES3-006	PTGES3-004	PTGES3-002	PTGES3-007
13	52026439	52027481	1043	15	3.08272e-15	0.237212	0.0244862	0.00596247	INTS6	INTS6-001	INTS6-007	INTS6-201	INTS6-202	INTS6-AS1-001	INTS6-203	INTS6-002	INTS6-204	INTS6-010	INTS6-003	INTS6-013	INTS6-014	INTS6-015	INTS6-016	INTS6-018	INTS6-009	INTS6-017	INTS6-AS1-019	INTS6-AS1-003	INTS6-AS1-008	INTS6-AS1-010	INTS6-AS1-012	INTS6-AS1-015	INTS6-AS1-013	INTS6-AS1-006	INTS6-AS1-007	INTS6-AS1-004	RPS4XP16-003	INTS6-AS1-009	INTS6-AS1-005	INTS6-AS1-020	INTS6-AS1-021	RPS4XP16-002	INTS6-AS1-016	INTS6-AS1-017	INTS6-AS1-002	INTS6-AS1-024	INTS6-AS1-018	INTS6-AS1-014	INTS6-AS1-023
6	91006592	91006647	56	7	1.80059e-09	0.238318	0.00606714	0.00315181	BACH2	BACH2-003	BACH2-005	BACH2-002	BACH2-007	BACH2-001	BACH2-008	BACH2-004	BACH2-201
9	140099722	140100410	689	10	2.00064e-11	0.23976	0.00630272	0.00306306	TMEM203	TMEM203-001	NDOR1-001	NDOR1-002	NDOR1-003	NDOR1-004	TMEM203-201	TPRN-004
7	6144367	6144402	36	5	1.70921e-09	0.241681	0.00543819	0.00257251	USP42	USP42-005	USP42-004	USP42-003	USP42-008	USP42-007	USP42-009
17	54991398	54991993	596	12	7.40163e-11	0.244787	0.00714396	0.00367315	TRIM25	TRIM25-001	TRIM25-201	TRIM25-002	TRIM25-004
15	89877906	89878452	547	9	1.734e-10	0.246117	0.0064738	0.00409034	POLG	POLG-001	POLG-002	POLG-011	RP11-217B1.2-001	RP11-217B1.2-002
2	86850757	86851318	562	9	6.61265e-11	0.247897	-0.0104337	0.00226923	RNF103	RNF103-001	RNF103-CHMP3-001	RNF103-006	RNF103-003	RNF103-004	RNF103-005
9	140445760	140446458	699	10	1.0292e-11	0.249682	0.00766325	0.00311871	PNPLA7	PNPLA7-007	MRPL41-001	PNPLA7-201
17	65373386	65374072	687	9	5.52286e-11	0.250923	0.00535233	0.00307144	PITPNC1	PITPNC1-201	PITPNC1-202	PITPNC1-001	PITPNC1-002	PITPNC1-004
21	19191630	19192138	509	7	1.22839e-09	0.253484	0.0152517	0.00461722	C21orf91	C21orf91-003	C21orf91-002	C21orf91-001	C21orf91-005	C21orf91-006	C21orf91-004
22	50312165	50312357	193	4	1.36581e-09	0.254505	0.013936	0.00504505	CRELD2	CRELD2-001	ALG12-001	CRELD2-005	CRELD2-002	CRELD2-003	CRELD2-008	CRELD2-006	CRELD2-004
12	6976631	6977465	835	7	2.69982e-12	0.255333	0.01045	0.00220339	TPI1	TPI1-001	TPI1-008	TPI1-004	TPI1-007	TPI1-006	TPI1-002	TPI1-003	TPI1-005	TPI1-201
5	65440099	65440627	529	7	4.95639e-11	0.256886	0.00767522	0.00333612	SREK1	SREK1-001	SREK1-002	SREK1-010	SREK1-004	AC025442.3-001	SREK1-005	SREK1-008	SREK1-016
12	100536345	100537139	795	11	2.48948e-11	0.260162	-0.0489388	-0.000211212	UHRF1BP1L	UHRF1BP1L-001	UHRF1BP1L-002	UHRF1BP1L-004	RP11-175P13.2-001
9	80850795	80851119	325	8	5.55621e-11	0.261255	0.0174492	0.0057841	CEP78	CEP78-009	CEP78-008	CEP78-003	CEP78-004	CEP78-001	CEP78-010	CEP78-006
19	2269397	2269889	493	7	7.40032e-10	0.261745	0.0103616	0.00412109	OAZ1	OAZ1-201	OAZ1-003	OAZ1-004	OAZ1-005	OAZ1-007	OAZ1-001	OAZ1-011	OAZ1-008	JSRP1-002	OAZ1-012	OAZ1-009	OAZ1-006	JSRP1-001	OAZ1-002
2	233497827	233498259	433	9	1.97892e-11	0.264095	-0.0125102	0.00320118	EFHD1	EFHD1-001	EFHD1-006
14	101531403	101531768	366	6	4.81178e-10	0.267258	-0.0282129	-0.0108497	MIR412	MIR412-201	MIR369-201	MIR410-201	MIR409-201	MIR656-201	MIR541-201
11	561340	561360	21	3	1.40488e-09	0.26892	0.00498736	0.00407933	C11orf35	C11orf35-001	RASSF7-201	RASSF7-001	RASSF7-003	RASSF7-005	RASSF7-002	C11orf35-004	RASSF7-004	C11orf35-005	C11orf35-003	RASSF7-006	RASSF7-007	RASSF7-008	RP11-496I9.1-002
16	3108458	3108898	441	4	1.81678e-10	0.270062	0.0117182	0.00205832	RP11	RP11-473M20.7-007	RP11-473M20.7-010	RP11-473M20.7-005	RP11-473M20.7-004	RP11-473M20.7-008	RP11-473M20.7-006	MMP25-004	RP11-473M20.7-001
4	1713762	1714399	638	8	3.77687e-11	0.270083	0.0107691	0.00343583	SLBP	SLBP-004	SLBP-002	SLBP-006	SLBP-007	SLBP-003	SLBP-001	RP11-572O17.1-001
[truncated: 172 more rows]
[truncated: 6 more columns]
